# Supplementary material for: A systematic review of the prevalence of DNA damage response gene mutations in prostate cancer
Source: PubMed Central journal article supplement — Int J Oncol. 2019 Jul 16;55(3):597–616. doi: 10.3892/ijo.2019.4842 (PMC6685596; doi:10.3892/ijo.2019.4842), 2019-07-16

## Data S1

### Appendix S1. Inclusion criteria.

| Item          | Included                                                                                                                                                                                                                                                                                                                                                                                                                                                                                                                                                                                | Excluded                                                                                                                                                                                                                                                                    |
|---------------|-----------------------------------------------------------------------------------------------------------------------------------------------------------------------------------------------------------------------------------------------------------------------------------------------------------------------------------------------------------------------------------------------------------------------------------------------------------------------------------------------------------------------------------------------------------------------------------------|-----------------------------------------------------------------------------------------------------------------------------------------------------------------------------------------------------------------------------------------------------------------------------|
| Population    | <ul style="list-style-type: none"> <li>Men (aged <math>\geq 18</math> yrs) with known DDR status with:               <ul style="list-style-type: none"> <li>mCRPC</li> <li>mPC</li> <li>CRPC</li> <li>Any type of PC</li> </ul> </li> </ul>                                                                                                                                                                                                                                                                                                                                             | <ul style="list-style-type: none"> <li>Pediatric or adolescent populations</li> <li>Upregulated or downregulated wild-type DDR genes</li> </ul>                                                                                                                             |
| Interventions | Not relevant                                                                                                                                                                                                                                                                                                                                                                                                                                                                                                                                                                            | Not relevant                                                                                                                                                                                                                                                                |
| Comparator    | Not relevant                                                                                                                                                                                                                                                                                                                                                                                                                                                                                                                                                                            | Not relevant                                                                                                                                                                                                                                                                |
| Outcomes      | <ul style="list-style-type: none"> <li>Incidence/prevalence rates of DDR+ (germline or somatic mutations)</li> <li>Incidence/prevalence of DDR (germline or somatic mutations) expressed as a percentage</li> <li>Incidence/prevalence of DDR (germline or somatic mutations) expressed as a proportion</li> </ul> <p><i>Note:</i> The 11 DDR genes of interest are listed below.</p> <p><i>Note:</i> These data may be based on archival and/or fresh tissue samples and/or liquid (eg, blood) samples. Both patient-level and sample-level data will be included, where relevant.</p> | <ul style="list-style-type: none"> <li>Incidence/prevalence of individual polymorphisms—unless proven to be</li> </ul>                                                                                                                                                      |
| Study design  | <ul style="list-style-type: none"> <li>Any observational study (retrospective, prospective, cross-sectional)</li> <li>Database/registry studies</li> <li>Systematic reviews (these will be checked for primary studies)</li> </ul>                                                                                                                                                                                                                                                                                                                                                      | <ul style="list-style-type: none"> <li>Clinical trials, experimental studies, and interventional studies involving highly selected patient populations</li> <li>Studies that analyze only cell lines rather than primary patient specimens</li> <li>Case reports</li> </ul> |
| DDR           | <ul style="list-style-type: none"> <li>Any of the following individual genes: <i>ATM</i>, <i>ATR</i>, <i>BRCA1</i>, <i>BRCA2</i>, <i>CHEK2</i>, <i>FANCA</i>, <i>MLH1</i>, <i>MRE11A</i>, <i>NBN</i>, <i>PALB2</i>, and <i>RAD51C</i>. DDR defined as any combination of the listed genes.</li> </ul>                                                                                                                                                                                                                                                                                   | <ul style="list-style-type: none"> <li>When the prevalence of multiple variants for a given gene were presented (or single nucleotide polymorphisms), only those described as pathogenic were extracted; others were excluded.</li> </ul>                                   |

*ATM*, ataxia telangiectasia mutated; *ATR*, ataxia telangiectasia and *Rad3*-related protein; *BRCA*, breast cancer susceptibility gene; *CHEK2*, checkpoint kinase 2; CRPC, castration-resistant PC; DDR, DNA damage repair; *FANCA*, Fanconi anemia complementation group A; m, metastatic; *MLH1*, mutL homolog 1; *MRE11A*, *MRE11* homolog A, double-strand break repair nuclease; *NBN*, nibrin; *PALB2*, partner and localizer of *BRCA2*; PC, prostate cancer; *RAD51C*, *RAD51* paralog C.

### Appendix S2. Literature searches.

Searches were carried out to identify studies in the treatment and epidemiology of DDR-positive prostate cancer. All search methods were conducted to follow best practice standards in systematic reviews (1,2).

Search strategies were developed specifically for each database and the key words adapted according to the configuration of each database. Only studies conducted in humans were sought. Searches were not limited by language or publication status (unpublished or published).

The following databases were searched from study inception to December 2017:

- MEDLINE (Ovid): 1946-2017/11/wk 4
- MEDLINE In-Process Citations, Medline Daily Update & Epub Ahead of Print (Ovid): up to 2017/12/05
- Embase (Ovid): 1974-2017/12/04
- Cochrane Database of Systematic Reviews (CDSR) (Wiley): Issue 12/Dec 2017
- Cochrane Central Register of Controlled Trials (CENTRAL) (Wiley): Issue 11/Nov 2017
- Database of Abstracts of Reviews of Effects (DARE) (Wiley): Issue 4/April 2015
- Health Technology Assessment Database (HTA) (Wiley): Issue 4/Oct 2016
- NHS Economic Evaluation Database (NHS EED) (Wiley): Issue 4/April 2015
- PubMed (NLM) (Internet): up to 2017/12/11
- CINAHL (EBSCO): 1981-2017/12/06
- LILACS (BIRME): up to 2017/12/11

Supplementary searches were undertaken in the following trial registers:

- ClinicalTrials.gov (Internet): up to 2017/12/11 <http://www.clinicaltrials.gov/>
- WHO International Clinical Trials Registry Platform (ICTRP): up to 2017/12/12 <http://www.who.int/ictrp/en/>

Conference abstracts and proceedings were identified as part of a 3-stage approach:

- The main Ovid Embase search strategy was employed to include conference abstracts and proceedings;
- A second tailored search was conducted using the Northern Light Life Sciences Conference Abstracts database via Ovid (2016-2017/wk 47)
- Limited internet scanning was conducted for any unindexed conference proceedings, selected by Pfizer.

The named conference proceedings were checked against Embase and Northern Light to determine which proceedings were indexed within the databases. The following proceedings were indexed and included in the Embase and Northern Light database searches:

- American Society for Clinical Oncology (ASCO): 2016 & 2017
- ASCO Genitourinary Cancers Symposium: 2016 & 2017

- European Society for Medical Oncology (ESMO): 2016 only
- European CanCer Organisation (ECCO): 2017 only
- American Urological Association (AUA): 2016 & 2017
- European Association of Urology (EAU): 2016 & 2017
- American Association for Cancer Research (AACR): 2016 & 2017

Limited additional scanning of internet conference proceedings was carried for the following unindexed proceedings (2016-2017 only):

- European Society for Medical Oncology (ESMO): 2017 only
- National Comprehensive Cancer Network (NCCN): 2016 & 2017
- Society of Urologic Oncology (SUO): 2016 & 2017

#### *Handling of citations*

Identified references were downloaded into Endnote X8 software for further assessment and handling. Individual records within the Endnote reference library were tagged with searching information, such as searcher, date searched, database host, database searched, strategy name and iteration, theme or search question.

#### *Quality assurance within the search process*

The main Embase strategy was independently peer reviewed by a second Information specialist. Strategy peer review was informed by items based on the CADTH checklist (3,4).

### **Search Strategies**

Embase (Ovid): 1974-2017/12/04

Searched 5.12.17

- 1 exp prostate cancer/ (183779)
- 2 exp prostate tumor/ (208063)
- 3 (prostat\$ adj4 (cancer\$ or neoplas\$ or carcinoma\$ or malignan\$ or adenocarcinoma\$ or tumo?r\$ or adenoma\$ or met or mets or metasta\$)).ti,ab,ot. (184826)
- 4 (prostat\$ adj3 (castrat\$ resist\$ or hormone refrac\$ or androgen independ\$ or androgen insensit\$ or androgen in-sensit\$ or androgen resist\$)).ti,ab,ot. (14783)
- 5 (mpc or mcrpc or crpc).ti,ab,ot. (11297)
- 6 or/1-5 (235566)
- 7 exp DNA damage/ (128563)
- 8 exp DNA repair/ (82299)
- 9 (DNA adj2 damag\$).ti,ab,ot. (93314)
- 10 (DNA adj2 repair\$).ti,ab,ot. (60659)
- 11 (DNA adj2 injur\$).ti,ab,ot. (753)

- 12 DDR\$.ti,ab,ot. (6742)
- 13 (base excision repair\$ or BER).ti,ab,ot. (7366)
- 14 (deoxyribonucleic acid adj3 (damag\$ or injur\$)).ti,ab,ot. (315)
- 15 (dna adj2 lesion\$).ti,ab,ot. (9081)
- 16 ((photoinduced or photo induced) adj2 dna).ti,ab,ot. (208)
- 17 (genotoxic adj2 stress\$).ti,ab,ot. (3467)
- 18 (Homologous recombination deficit\$ or HRD).ti,ab,ot. (653)
- 19 (double strand break\$ or DSB).ti,ab,ot. (21165)
- 20 (single strand break\$ or SSB).ti,ab,ot. (9297)
- 21 (H2AX or pH2AX or phosphorylated H2AX or phosphorylated-H2AX or gamma-H2AX or gamma H2AX or yH2AX).ti,ab,ot. (6742)
- 22 comet assay/ (11267)
- 23 (comet adj2 assay\$).ti,ab,ot. (11305)
- 24 BRCA1 protein/ (14056)
- 25 BRCA2 protein/ (10158)
- 26 (BRCA\$ or gBRCA or BRIP1 or BACH1).ti,ab,ot. (24734)
- 27 Rad51 protein/ (4150)
- 28 RAD51c\$.ti,ab,ot. (506)
- 29 Fanconi anemia/ (5758)
- 30 Fanconi anemia protein/ or Fanconi anemia group A protein/ (956)
- 31 (FANCA or FA-H or FA1 or FAA or FACA or FAH or FANCH or "Fanconi anemia complementation group A" or Fam175a).ti,ab,ot. (3110)
- 32 ((familial or hereditary) adj3 hypoplastic\$ adj3 an?emia).ti,ab,ot. (7)
- 33 ((familial or hereditary) adj3 aplastic\$ adj3 an?emia).ti,ab,ot. (35)
- 34 (fanconi\$ adj3 an?emia).ti,ab,ot. (5138)
- 35 ((fanconi\$ or congenital) adj3 pancytop?enia).ti,ab,ot. (81)
- 36 mckusick 2276\$.ti,ab,ot. (0)
- 37 checkpoint kinase 2/ (3796)
- 38 ((Checkpoint adj2 Kinase) or CHEK2 or CHK2 or HuCds or HCds1 or CDS1).ti,ab,ot. (4937)
- 39 cyclin dependent kinase/ (9776)
- 40 ((cyclin or cycle) adj3 kinase).ti,ab,ot. (19964)
- 41 (Cdc2 or CRKRS or CRK7 or KIAA0904 or HCDK12 or CRKR).ti,ab,ot. (5709)

- 42 (PALB2 or PNCA3).ti,ab,ot. (929)
- 43 (MRE11\$ or Meiotic Recombination or AT-Like Disease\$ or HNGS1).ti,ab,ot. or MRE11 protein/ (4761)
- 44 nibrin/ (1157)
- 45 (nibrin or NBN or NBS1 or Nijmegen breakage syndrome\$).ti,ab,ot. (2271)
- 46 (KIAA1794 or Protein FANCD1).ti,ab,ot. (2)
- 47 ATM protein/ (8350)
- 48 (ATM or Ataxia Telangiectasia or A-T Mutated or Telomere Maintenance 1 or AT Mutated).ti,ab,ot. (20754)
- 49 ATR protein/ (3016)
- 50 (ATR or FRP1 or Mitosis Entry Checkpoint).ti,ab,ot. (10857)
- 51 (FANCD1\$ or FA-D2 or FANCD2 or FA4).ti,ab,ot. (315)
- 52 MutL protein homolog 1/ (567)
- 53 (MLH1 or MLH3 or COXA2 or HNPCC7 or (MutL adj3 homolog)).ti,ab,ot. (5322)
- 54 or/7-53 (304179)
- 55 exp nicotinamide adenine dinucleotide adenosine diphosphate ribosyltransferase inhibitor/ (8926)
- 56 ((PARP\$ or PARP\$) adj3 inhibitor\$).ti,ab,ot,rm. (5297)
- 57 talazoparib/ (292)
- 58 (talazoparib or BMN-673 or bmn673 or BMN-673ts or bmn673ts or 1207456-01-6 or 1373431-65-2).ti,ab,ot,rm. (348)
- 59 olaparib/ (2790)
- 60 (olaparib or Lynparza or AZD-2281 or AZD2281 or ku-0059436 or ku0059436 or ku-59436 or ku59436 or 763113-22-0).ti,ab,ot,rm. (2867)
- 61 veliparib/ (1334)
- 62 (Veliparib or ABT-888 or abt888 or 912444-00-9).ti,ab,ot,rm. (1490)
- 63 rucaparib/ (594)
- 64 (Rucaparib or rubraca or ag-014699 or ag014699 or ag-14447 or ag14447 or ag14699 or ag-14699 or co-338 or co338 or pf-01367338 or pf1367338 or pf01367338 or pf-1367338 or pf1367338bw or pf-1367338bw or 859053-21-6 or 283173-50-2 or 459868-92-9).ti,ab,ot,rm. (625)
- 65 niraparib/ (385)
- 66 (Niraparib or Zejula or MK-4827 or MK4827 or 038915-60-4).ti,ab,ot,rm. (403)
- 67 or/55-66 (9985)
- 68 54 or 67 (308401)

69 6 and 68 (6611)

70 animal/ or animal experiment/ (3989568)

71 (rat or rats or mouse or mice or murine or rodent or rodents or hamster or hamsters or pig or pigs or porcine or rabbit or rabbits or animal or animals or dogs or dog or cats or cow or bovine or sheep or ovine or monkey or monkeys).ti,ab,ot,hw. (6682078)

72 70 or 71 (6682078)

73 exp human/ or human experiment/ (19273429)

74 72 not (72 and 73) (5205450)

75 (letter or editorial or note).pt. (2256220)

76 69 not (74 or 75) (5987)

**Appendix S3. A. Studies not included in the analysis of prevalence in the unselected population or in subgroup analysis.**

| Author, year                 | Country | PC Group   | Selected population | Germline or somatic mutation | Mutation Definition                                                            | Period of data collection | Gene         | % prevalence | No. patients | References |
|------------------------------|---------|------------|---------------------|------------------------------|--------------------------------------------------------------------------------|---------------------------|--------------|--------------|--------------|------------|
| Unselected population        |         |            |                     |                              |                                                                                |                           |              |              |              |            |
| Liu <i>et al</i> , 2016      | NR      | PC         | Unselected          | Somatic                      | Undefined                                                                      | NR                        | <i>ATM</i>   | 5.6          | 36           | (5)        |
|                              |         |            |                     |                              |                                                                                |                           | <i>MLH1</i>  | 5.6          | 36           |            |
| Sonpavde <i>et al</i> , 2017 | NR      | mCRPC      | Unselected          | Somatic                      | Undefined                                                                      | NR                        | <i>BRCA1</i> | 5.0          | 514          | (6)        |
|                              |         |            |                     |                              |                                                                                |                           | <i>BRCA2</i> | 5.0          | 514          |            |
| Tanaka <i>et al</i> , 2009   | Japan   | PC         | Unselected          | Somatic                      | <i>MLH1</i> T/A at codon 384 (genotype)                                        | 1997 to 2003              | <i>MLH1</i>  | 3.4          | 177          | (7)        |
| Dall'Era <i>et al</i> , 2017 | USA     | Primary PC | Unselected          | NR/<br>unclear               | 85 DDR genes associated with cancer predisposition syndromes (undefined)       | NR                        | DDR          | 20.1         | 936          | (8)        |
| Dall'Era <i>et al</i> , 2017 | USA     | mPC        | Unselected          | NR/<br>unclear               | 85 DDR genes associated with cancer predisposition syndromes (undefined)       | NR                        | DDR          | 18.8         | 936          | (8)        |
| Daniel <i>et al</i> , 2017   | USA     | mPC        | Unselected          | NR/<br>unclear               | ≥1 deleterious <i>BRCA</i> GA ( <i>BRCA1</i> or <i>BRCA2</i> )                 | NR                        | DDR          | 11.3         | 1911         | (9)        |
| Feldman <i>et al</i> , 2014  | USA     | PC         | Unselected          | NR/<br>unclear               | <i>ATM</i> (undefined)                                                         | NR                        | <i>ATM</i>   | 5            | >330         | (10)       |
| Dawson <i>et al</i> , 2016   | USA     | PC         | Unselected          | NR/<br>unclear               | Alterations in ≥1 DNA repair gene (tested using a 592 gene hybrid capture NGS) | NR                        | DDR          | 84           | 31           | (11)       |
|                              | USA     | PC         | Unselected          | NR/<br>unclear               | <i>BRCA2</i> (undefined)                                                       | NR                        | <i>BRCA2</i> | 6            | 437          |            |

| Author, year                     | Country | PC Group   | Selected population | Germline or somatic mutation | Mutation Definition                                                                               | Period of data collection | Gene         | % prevalence | No. patients | References |
|----------------------------------|---------|------------|---------------------|------------------------------|---------------------------------------------------------------------------------------------------|---------------------------|--------------|--------------|--------------|------------|
| Uchida <i>et al</i> , 1999       | Japan   | Primary PC | Unselected          | NR/<br>unclear               | LOH at $\geq 1$ loci on chr17q (D17S250, D17S1320, D17S855, D17S1322, D17S1323, D17S579, D17S588) | NR                        | <i>BRCA1</i> | 16.7         | 24           | (12)       |
| Angele <i>et al</i> , 2004       | UK      | PC         | Unselected          | Germline                     | <i>ATM</i> 3161C>G                                                                                | 1993 to 2002              | <i>ATM</i>   | 7.4          | 226          | (13)       |
| Browning <i>et al</i> , 2006     | USA     | PC         | Unselected          | Germline                     | <i>ATM</i> heterozygous IVS62+60G/A polymorphism                                                  | 1997                      | <i>ATM</i>   | 30.61        | 98           | (14)       |
|                                  |         |            |                     |                              | <i>ATM</i> homozygous IVS62+60G/G                                                                 | 1997                      | <i>ATM</i>   | 18.37        | 98           |            |
|                                  |         |            |                     |                              | <i>ATM</i> homozygous IVS62+60A/A                                                                 | 1997                      | <i>ATM</i>   | 51.02        | 98           |            |
| Nam <i>et al</i> , 2005          | Canada  | PC         | Unselected          | Germline                     | All <i>CHEK2</i> (1100delC)                                                                       | Jun 1998 to Jan 2003      | <i>CHEK2</i> | 0.2          | 996          | (15)       |
| Naslund Koch <i>et al</i> , 2016 | Denmark | PC         | Unselected          | Germline                     | All <i>CHEK2</i> *1100delC                                                                        | 2003-2010                 | <i>CHEK2</i> | 0.74         | 39014        | (16)       |
| Gambhira <i>et al</i> , 2016     | USA     | mCRPC      | Unselected          | Somatic                      | <i>BRCA1</i> , <i>BRCA2</i> , <i>ATM</i> , <i>CDK12</i> , <i>MLH1</i> and/or <i>MSH2</i>          | NR                        | <i>DDR</i>   | 54           | 13           | (17)       |
| Xia <i>et al</i> , 2015          | USA     | PC         | Unselected          | Somatic                      | All <i>ATM</i> (c.8012T>G (p.V2671G))                                                             | NR                        | <i>ATM</i>   | 5.0          | 20           | (18)       |
|                                  |         |            |                     |                              | All <i>ATR</i> (c.7762G>A (p.A2588T))                                                             |                           | <i>ATR</i>   | 5.0          | 20           |            |
|                                  |         |            |                     |                              | All ( <i>CHEK2</i> c.721G>A (p.V241I))                                                            |                           | <i>CHEK2</i> | 5.0          | 20           |            |



| Author, year                  | Country | PC Group | Selected population | Germline or somatic mutation | Mutation Definition                                            | Period of data collection | Gene         | % prevalence | No. patients | References |
|-------------------------------|---------|----------|---------------------|------------------------------|----------------------------------------------------------------|---------------------------|--------------|--------------|--------------|------------|
|                               |         |          |                     |                              | <i>FANCA</i> c.1626G>T (pE542D)                                |                           | <i>FANCA</i> | 5.0          | 20           |            |
|                               |         |          |                     |                              | <i>FANCA</i> c.4009delA (p.S1337fs)                            |                           | <i>FANCA</i> | 5.0          | 20           |            |
|                               |         |          |                     |                              | All <i>FANCA</i> (c.4009delA (p.S1337fs); c.1626G>T (pE542D))  |                           | <i>FANCA</i> | 10.0         | 20           |            |
|                               |         |          |                     |                              | All <i>MLH1</i> (c.547T>A (p.Y183N))                           |                           | <i>MLH1</i>  | 5.0          | 20           |            |
|                               |         |          |                     |                              | All <i>NBN</i> (c.2186T>A (p.V729E))                           |                           | <i>NBN</i>   | 5.0          | 20           |            |
|                               |         |          |                     |                              | DDR mutations                                                  |                           | DDR          | 25           | 20           |            |
| Beltran <i>et al</i> , 2015   | USA     | mPC      | Unselected          | Somatic                      | <i>FANCA</i> deletion                                          | Feb 2013 to Sep 2014      | <i>FANCA</i> | 14           | 29           | (19)       |
| Palapattu <i>et al</i> , 2015 | USA     | PC       | Unselected          | Somatic                      | All (K2524fs)                                                  | NR                        | <i>BRCA2</i> | 11.1         | 9            | (20)       |
| Robbins <i>et al</i> , 2011   | USA     | mPC      | Unselected          | Somatic                      | All. 7840C>T likely damaging                                   | NR                        | <i>BRCA2</i> | 12.5         | 8            | (21)       |
| Beltran <i>et al</i> , 2013   | USA     | CRPC     | Unselected          | Somatic                      | DNA alterations in <i>ATM</i> in CRPC                          | NR                        | <i>ATM</i>   | 8            | 25           | (22)       |
|                               |         | CRPC     |                     |                              | DNA alterations in <i>BRCA2</i> in CRPC                        | NR                        | <i>BRCA2</i> | 12           | 25           |            |
|                               |         | mPC      |                     |                              | DNA alterations in <i>ATM</i> in metastatic hormone-naïve PC   | NR                        | <i>ATM</i>   | 0            | 4            |            |
|                               |         | mPC      |                     |                              | DNA alterations in <i>BRCA2</i> in metastatic hormone-naïve PC | NR                        | <i>BRCA2</i> | 25           | 4            |            |

| Author, year                | Country   | PC Group   | Selected population | Germline or somatic mutation | Mutation Definition                                                                                                                  | Period of data collection | Gene         | % prevalence | No. patients | References |
|-----------------------------|-----------|------------|---------------------|------------------------------|--------------------------------------------------------------------------------------------------------------------------------------|---------------------------|--------------|--------------|--------------|------------|
|                             |           | Primary PC |                     |                              | DNA alterations in <i>ATM</i> in clinically localized PC                                                                             | NR                        | <i>ATM</i>   | 0            | 16           |            |
|                             |           | Primary PC |                     |                              | DNA alterations in <i>BRCA2</i> in clinically localized PC                                                                           | NR                        | <i>BRCA2</i> | 6.25         | 16           |            |
|                             |           | CRPC       |                     |                              | Total mutations across 182 cancer-related genes (3230 exons) and 14 commonly rearranged genes (37 introns) in CRPC                   | NR                        | DDR          | 100          | 25           |            |
|                             |           | mPC        |                     |                              |                                                                                                                                      | NR                        | DDR          | 100          | 4            |            |
|                             |           | Primary PC |                     |                              |                                                                                                                                      | NR                        | DDR          | 56.25        | 16           |            |
| Subgroups                   |           |            |                     |                              |                                                                                                                                      |                           |              |              |              |            |
| Cheng <i>et al</i> , 2011   | Australia | PC         | Familial            | NR/<br>unclear               | Undefined                                                                                                                            | NR                        | <i>BRCA2</i> | 26.5         | 147          | (23)       |
| Nicolas <i>et al</i> , 2015 | USA       | PC         | Familial            | Germline                     | One affected gene; high-value DDR or androgen signalling pathway gene variants that may contribute to familial prostate risk         | NR                        | DDR          | 91.7         | 12           | (24)       |
|                             |           |            |                     |                              | ≥2 or more affected genes: high-value DDR or androgen signalling pathway gene variants that may contribute to familial prostate risk | NR                        |              | 41.7         | 12           |            |
| Meyer <i>et al</i> , 2007   | Germany   | Primary PC | Treatment           | Germline                     | <i>ATM</i> missense variant P1054R                                                                                                   | Oct 2000 to Apr 2006      | <i>ATM</i>   | 9.6          | 261          | (25)       |

| Author, year                  | Country | PC Group          | Selected population | Germline or somatic mutation | Mutation Definition                      | Period of data collection | Gene         | % prevalence | No. patients | References                      |
|-------------------------------|---------|-------------------|---------------------|------------------------------|------------------------------------------|---------------------------|--------------|--------------|--------------|---------------------------------|
| Damaraju <i>et al</i> , 2006  | Canada  | Primary PC        | Treatment           | Germline                     | <i>MLH1</i> C>T, Val219Ile               | Sept 1996 to Dec 2000     | <i>MLH1</i>  | 11           | 84           | (26)                            |
|                               |         |                   |                     |                              | <i>NBN</i> G>C, Glu185Gln                |                           | <i>NBN</i>   | 83           | 84           |                                 |
|                               |         |                   |                     |                              | <i>BRCA1</i> G>A, Met1652Ile             |                           | <i>BRCA1</i> | 6            | 83           |                                 |
|                               |         |                   |                     |                              | <i>BRCA1</i> A>G, Arg356Gln              |                           | <i>BRCA1</i> | 11           | 83           |                                 |
|                               |         |                   |                     |                              | <i>BRCA2</i> A>G, Lys1132Lys             |                           | <i>BRCA2</i> | 57           | 83           |                                 |
|                               |         |                   |                     |                              | <i>ATM</i> A>G, Asp1853Asn               |                           | <i>ATM</i>   | 69           | 84           |                                 |
| Schweizer <i>et al</i> , 2016 | USA     | Ductal PC         | Ductal PC           | Somatic                      | All (c.5946delT+likely LOH)              | NR                        | <i>BRCA2</i> | 11.1         | 9            | (27)<br>[Linked: True 2017(28)] |
|                               |         |                   |                     |                              | All (c.1100delC+LOH)                     | NR                        | <i>CHEK2</i> | 11.1         | 9            |                                 |
|                               |         |                   |                     |                              | All (exon 19+ 3'UTR homozygous deletion) | NR                        | <i>MLH1</i>  | 11.1         | 9            |                                 |
|                               |         |                   |                     |                              | <i>CHEK2, BRCA2, MSH6, MSH2, MLH1</i>    | NR                        | DDR          | 66.7         | 9            |                                 |
| Stephens <i>et al</i> , 2016  | NR      | Neuroendocrine PC | Neuroendocrine PC   | Somatic                      | Undefined                                | NR                        | DDR          | 14           | 32           | (29)                            |

Red text indicates criteria that led to studies being deemed irrelevant to the analysis. *ATM*, ataxia telangiectasia mutated; *ATR*, ataxia telangiectasia and Rad3-related protein; *BRCA*, breast cancer susceptibility gene; *CHEK2*, checkpoint kinase 2; CRPC, castration-resistant PC; DDR, DNA damage repair; *FANCA*, Fanconi anemia complementation group A; LOH, loss of heterozygosity; m, metastatic; *MLH1*, mutL homolog 1; *MRE11A*, *MRE11* homolog A, double-strand break repair nuclease; MSH, MutS homolog; *NBN*, nibrin; *PALB2*, partner and localizer of *BRCA2*; PC, prostate cancer; *RAD51C*, *RAD51* paralog C.

## B. Excluded records at full paper screening.

| Reference                                                                                                                                                                                                                                                                                                                                                                                                                                                                                                                                                                                                                                                                                                                                                                                                                                                                                                                                                                                                                                                                                                                                                                                                    | Reason for exclusion         |
|--------------------------------------------------------------------------------------------------------------------------------------------------------------------------------------------------------------------------------------------------------------------------------------------------------------------------------------------------------------------------------------------------------------------------------------------------------------------------------------------------------------------------------------------------------------------------------------------------------------------------------------------------------------------------------------------------------------------------------------------------------------------------------------------------------------------------------------------------------------------------------------------------------------------------------------------------------------------------------------------------------------------------------------------------------------------------------------------------------------------------------------------------------------------------------------------------------------|------------------------------|
| <p>[1] Abida W, Brennan R, Armenia J, Curtis KR, Gopalan A, Arcila ME, et al. Genomic characterization of primary and metastatic prostate cancer (PC) using a targeted next-generation sequencing assay. In: American Society of Clinical Oncology Genitourinary Cancers Symposium 2016; 07-Jan-2016, 2016. Available from: American Society of Clinical Oncology (ASCO)<br/> <a href="https://discovery.northernlight.com/document.php?datasource=PHE&amp;docid=PE20160202020001400&amp;context=WK%40northernlight.com&amp;doctype=abstract&amp;docurl=http%3A%2F%2Fmeetinglibrary.asco.org%2Fcontent%2F158192-172&amp;token=b3e6fad5b65095aa7eeacfd610b2e1b">https://discovery.northernlight.com/document.php?datasource=PHE&amp;docid=PE20160202020001400&amp;context=WK%40northernlight.com&amp;doctype=abstract&amp;docurl=http%3A%2F%2Fmeetinglibrary.asco.org%2Fcontent%2F158192-172&amp;token=b3e6fad5b65095aa7eeacfd610b2e1b</a><br/> <a href="http://ovidsp.ovid.com/ovidweb.cgi?T=JS&amp;CSC=Y&amp;NEWS=N&amp;PAGE=fulltext&amp;D=dscv6&amp;AN=PE20160202020001400">http://ovidsp.ovid.com/ovidweb.cgi?T=JS&amp;CSC=Y&amp;NEWS=N&amp;PAGE=fulltext&amp;D=dscv6&amp;AN=PE20160202020001400</a></p> | Duplicate                    |
| <p>[2] A'Hern R, De Bono J, Sandhu S, Kalaitzaki E, Usdin M, Hall EE. Phase II investigation of a PARP inhibitor (olaparib) in castration resistant prostate cancer (CRPC) which incorporates the possibility that treatment effect may be restricted to biomarker defined subgroups. <i>Trials</i> 2011.</p>                                                                                                                                                                                                                                                                                                                                                                                                                                                                                                                                                                                                                                                                                                                                                                                                                                                                                                | No relevant outcome          |
| <p>[3] A'Hern R, De Bono J, Sandhu S, Kalaitzaki E, Usdin M, Hall E. A two stage phase II design incorporating the possibility that the treatment effect may be restricted to a biomarker defined subgroup: Investigation of a PARP inhibitor (Olaparib) in Castration Resistant Prostate Cancer (CRPC). <i>Clin Trials</i> 2012;9(4):552-553.</p>                                                                                                                                                                                                                                                                                                                                                                                                                                                                                                                                                                                                                                                                                                                                                                                                                                                           | No relevant outcome          |
| <p>[4] Allen-Brady K, Farnham JM, Camp NJ, Karlins E, Ostrander EA, Cannon-Albright LA. No evidence of BRCA2 mutations in chromosome 13q-linked Utah high-risk prostate cancer pedigrees. <i>BMC Res Notes</i> 2009;2:94.</p>                                                                                                                                                                                                                                                                                                                                                                                                                                                                                                                                                                                                                                                                                                                                                                                                                                                                                                                                                                                | Not a relevant population    |
| <p>[5] Annala M, Struss WJ, Warner EW, Beja K, Vandekerkhove G, Wong A, et al. Treatment outcomes and tumor loss of heterozygosity in germline DNA repair-deficient prostate cancer. <i>Eur Urol</i> 2017;72(1):34-42.</p>                                                                                                                                                                                                                                                                                                                                                                                                                                                                                                                                                                                                                                                                                                                                                                                                                                                                                                                                                                                   | Not relevant study design    |
| <p>[6] Anonymous. Repair-Gene Mutations Uncovered in Metastatic Prostate Cancer. <i>Cancer Discovery</i> 2016;6(9):OF3.</p>                                                                                                                                                                                                                                                                                                                                                                                                                                                                                                                                                                                                                                                                                                                                                                                                                                                                                                                                                                                                                                                                                  | Not primary research         |
| <p>[7] Evans JR. (S028) patient-level DNA damage and repair pathway profiles are prognostic after prostatectomy for high-risk prostate cancer. <i>Oncology</i> 2015;29(4 Suppl 1):21.</p>                                                                                                                                                                                                                                                                                                                                                                                                                                                                                                                                                                                                                                                                                                                                                                                                                                                                                                                                                                                                                    | No DDR mutation/not relevant |
| <p>[8] Armenia J, Mullane S, Gao J, Chakravarty D, Kundra R, Huang F, et al. The long tail of significantly mutated genes in prostate cancer. <i>Cancer Res</i> 2017.</p>                                                                                                                                                                                                                                                                                                                                                                                                                                                                                                                                                                                                                                                                                                                                                                                                                                                                                                                                                                                                                                    | No data (abstract)           |
| <p>[9] Armenia J, Mullane SA, Gao JJ, Chakravarty D, Kundra R, Huang FW, et al. The long tail of significantly mutated genes in prostate cancer. <i>J Clin Oncol</i> 2017.</p>                                                                                                                                                                                                                                                                                                                                                                                                                                                                                                                                                                                                                                                                                                                                                                                                                                                                                                                                                                                                                               | No data (abstract)           |
| <p>[10] AstraZeneca. Open label study to assess efficacy and safety of olaparib in confirmed genetic BRCA1 or BRCA2 mutation pats. NCT01078662. In: <i>ClinicalTrials.gov</i> [Internet]. Bethesda (MD): National Library of Medicine (US). 2012 [accessed 11.12.17]. Available from: <a href="https://ClinicalTrials.gov/show/NCT01078662">https://ClinicalTrials.gov/show/NCT01078662</a>.</p>                                                                                                                                                                                                                                                                                                                                                                                                                                                                                                                                                                                                                                                                                                                                                                                                             | No relevant outcome          |

|                                                                                                                                                                                                                                                                                                                                                                                                                                                                                                                                                                                                                                                                                                                                                                                                                      |                     |
|----------------------------------------------------------------------------------------------------------------------------------------------------------------------------------------------------------------------------------------------------------------------------------------------------------------------------------------------------------------------------------------------------------------------------------------------------------------------------------------------------------------------------------------------------------------------------------------------------------------------------------------------------------------------------------------------------------------------------------------------------------------------------------------------------------------------|---------------------|
| [11] AstraZeneca. Study of Olaparib (Lynparza™) Versus enzalutamide or abiraterone acetate in men with metastatic castration-resistant prostate cancer (PROfound Study). NCT02987543. In: WHO International Clinical Trials Registry Platform (ICTRP) [Internet]. Geneva: World Health Organization (WHO). 2016 [accessed 12.12.17]. Available from: <a href="https://clinicaltrials.gov/show/NCT02987543">https://clinicaltrials.gov/show/NCT02987543</a> .                                                                                                                                                                                                                                                                                                                                                         | No relevant outcome |
| [12] AstraZeneca. Study of Olaparib (Lynparza™) Versus enzalutamide or abiraterone acetate in men with metastatic castration-resistant prostate cancer (PROfound Study). EUCTR2016-000300-28-SE. In: WHO International Clinical Trials Registry Platform (ICTRP) [Internet]. Geneva: World Health Organization (WHO). 2017 [accessed 12.12.17]. Available from: <a href="https://www.clinicaltrialsregister.eu/ctr-search/search?query=eudract_number:2016-000300-28">https://www.clinicaltrialsregister.eu/ctr-search/search?query=eudract_number:2016-000300-28</a> .                                                                                                                                                                                                                                              | No relevant outcome |
| [13] AstraZeneca. Study of olaparib (Lynparza™) versus enzalutamide or abiraterone acetate in men with metastatic castration-resistant prostate cancer (PROfound Study). NCT02987543. In: ClinicalTrials.gov [Internet]. Bethesda (MD): National Library of Medicine (US). 2020 [accessed 11.12.17]. Available from: <a href="https://ClinicalTrials.gov/show/NCT02987543">https://ClinicalTrials.gov/show/NCT02987543</a> .                                                                                                                                                                                                                                                                                                                                                                                         | Duplicate           |
| [14] Aurelius Omlin. Carboplatin in castration-resistant prostate cancer. NCT02311764. In: WHO International Clinical Trials Registry Platform (ICTRP) [Internet]. Geneva: World Health Organization (WHO). 2014 [accessed 12.12.17]. Available from: <a href="https://clinicaltrials.gov/show/NCT02311764">https://clinicaltrials.gov/show/NCT02311764</a> .                                                                                                                                                                                                                                                                                                                                                                                                                                                        | No relevant outcome |
| [15] Banks P, San Leong H, Ryland G, Beshay V, Tran B, Toner G, et al. DNA repair gene defects in Australian men with metastatic castration-resistant prostate cancer (mCRPC). BJU Int 2017.                                                                                                                                                                                                                                                                                                                                                                                                                                                                                                                                                                                                                         | No data (abstract)  |
| [16] Banks P, Leong HS, Ryland G, Beshay V, Tran B, Toner G, et al. DNA repair gene defects in Australian men with metastatic castration-resistant prostate cancer (MCRPC). Asia Pac J Clin Oncol 2017.                                                                                                                                                                                                                                                                                                                                                                                                                                                                                                                                                                                                              | No data (abstract)  |
| [17] Barrett A, Schwartz LE. Morphologic and clinical comparison of BRCA+ And BRCA prostate carcinoma. In: United States & Canadian Academy of Pathology Annual Meeting 2017; 04-Mar-2017, 2017. Available from: United States & Canadian Academy of Pathology (USCAP). <a href="https://discovery.northernlight.com/document.php?datasource=PHE&amp;docid=PE20170228000002090&amp;context=WK%40northernlight.com">https://discovery.northernlight.com/document.php?datasource=PHE&amp;docid=PE20170228000002090&amp;context=WK%40northernlight.com</a><br><a href="http://ovidsp.ovid.com/ovidweb.cgi?T=JS&amp;CSC=Y&amp;NEWS=N&amp;PAGE=fulltext&amp;D=dscv6&amp;AN=PE20170228000002090">http://ovidsp.ovid.com/ovidweb.cgi?T=JS&amp;CSC=Y&amp;NEWS=N&amp;PAGE=fulltext&amp;D=dscv6&amp;AN=PE20170228000002090</a> | Duplicate           |
| [18] Barrett A, Schwartz LE. Morphologic and clinical comparison of BRCA+ and brcaprostate carcinoma. Lab Invest 2017.                                                                                                                                                                                                                                                                                                                                                                                                                                                                                                                                                                                                                                                                                               | No relevant outcome |
| [19] Basu S, Majumder S, Bhowal A, Ghosh A, Naskar S, Nandy S, et al. A study of molecular signals deregulating mismatch repair genes in prostate cancer compared to benign prostatic hyperplasia. PLoS One 2015;10(5):e0125560.                                                                                                                                                                                                                                                                                                                                                                                                                                                                                                                                                                                     | No relevant outcome |
| [20] Bednarz N, Eltze E, Semjonow A, Rink M, Andreas A, Mulder L, et al. BRCA1 loss preexisting in small subpopulations of prostate cancer is associated with advanced disease and metastatic spread to lymph nodes and peripheral blood. Clin Cancer Res 2010;16(13):3340-3348.                                                                                                                                                                                                                                                                                                                                                                                                                                                                                                                                     | No relevant outcome |

|                                                                                                                                                                                                                                                                                                                                                                                                                                                                                                                                                                                                                                                                                                                                                                                                                                                                                                                                                                         |                           |
|-------------------------------------------------------------------------------------------------------------------------------------------------------------------------------------------------------------------------------------------------------------------------------------------------------------------------------------------------------------------------------------------------------------------------------------------------------------------------------------------------------------------------------------------------------------------------------------------------------------------------------------------------------------------------------------------------------------------------------------------------------------------------------------------------------------------------------------------------------------------------------------------------------------------------------------------------------------------------|---------------------------|
| [21] Bednarz N, Semjonow A, Osher PJ, Brandt B. BRCA1 loss in prostate cancer is associated with metastatic spread: Novel predictor of parp-inhibitory therapy? <i>Biochimica Clinica</i> 2013;37:S160.                                                                                                                                                                                                                                                                                                                                                                                                                                                                                                                                                                                                                                                                                                                                                                 | No relevant outcome       |
| [22] BeiGene Usa Inc, Myriad Genetics Inc, BeiGene. Study to assess safety, tolerability and clinical activity of BGB-290 in combination with temozolomide (TMZ) in subjects with locally advanced or metastatic solid tumors. NCT03150810. In: <i>ClinicalTrials.gov</i> [Internet]. Bethesda (MD): National Library of Medicine (US). 2020 [accessed 11.12.17]. Available from: <a href="https://ClinicalTrials.gov/show/NCT03150810">https://ClinicalTrials.gov/show/NCT03150810</a> .                                                                                                                                                                                                                                                                                                                                                                                                                                                                               | No relevant outcome       |
| [23] Beltran H, Stephens PJ, Mosquera JM, Cronin MT, Rubin MA, Yelensky R, et al. Massively parallel DNA-sequencing of aggressive prostate cancer reveals disease heterogeneity and identifies targetable mutations. <i>Cancer Res</i> 2012.                                                                                                                                                                                                                                                                                                                                                                                                                                                                                                                                                                                                                                                                                                                            | Not a relevant population |
| [24] Beltran H, Yelensky R, Frampton G, Park K, Downing S, Macdonald T, et al. Targeted next-generation sequencing (NGS) of advanced prostate cancer (PCA) using formalin-fixed tissue. <i>J Clin Oncol</i> 2012.                                                                                                                                                                                                                                                                                                                                                                                                                                                                                                                                                                                                                                                                                                                                                       | Not a relevant population |
| [25] Beltran H, Eng K, Mosquera JM, Sigaras A, Romanel A, Rennart H, et al. Precision cancer medicine program for whole-exome sequencing of metastatic tumors reveals biomarkers of response. <i>Cancer Res</i> 2015.                                                                                                                                                                                                                                                                                                                                                                                                                                                                                                                                                                                                                                                                                                                                                   | No data (abstract)        |
| [26] Bolton D, Thorne H, Willems A, Ho I, Niedemeyer E, Cheng Y, et al. Increased prostate cancer-specific mortality of men with germline BRCA2 mutations from multiple breast cancer families. <i>BJU Int</i> 2011;107:30-31.                                                                                                                                                                                                                                                                                                                                                                                                                                                                                                                                                                                                                                                                                                                                          | No relevant outcome       |
| [27] Bonnet C, Castanon Alvarez E, Michot JM, Bigot F, Varga A, Gazzah A, et al. Patients with metastatic prostate cancer enrolled in phase 1 trials: Outcomes and molecular alterations. <i>Ann Oncol</i> 2016.                                                                                                                                                                                                                                                                                                                                                                                                                                                                                                                                                                                                                                                                                                                                                        | Not relevant study design |
| [28] Bono JSD, Hussain M, Thiery-Vuillemin A, Mateo J, Sartor AO, Chi KN, et al. PROfound: A randomized phase iii trial evaluating olaparib in patients with metastatic castration-resistant prostate cancer and a deleterious homologous recombination DNA repair aberration. In: American Society of Clinical Oncology Annual Meeting 2017; 02-Jun-2017, 2017. Available from: American Society of Clinical Oncology (ASCO) <a href="https://discovery.northernlight.com/document.php?datasource=PHE&amp;docid=PE20170614080002190&amp;context=WK%40northernlight.com">https://discovery.northernlight.com/document.php?datasource=PHE&amp;docid=PE20170614080002190&amp;context=WK%40northernlight.com</a> <a href="http://ovidsp.ovid.com/ovidweb.cgi?T=JS&amp;CSC=Y&amp;NEWS=N&amp;PAGE=fulltext&amp;D=dscv6&amp;AN=PE20170614080002190">http://ovidsp.ovid.com/ovidweb.cgi?T=JS&amp;CSC=Y&amp;NEWS=N&amp;PAGE=fulltext&amp;D=dscv6&amp;AN=PE20170614080002190</a> | No relevant outcome       |
| [29] Boudadi K, Suzman DL, Lubner B, Hao W, Silberstein J, Sullivan R, et al. Phase 2 biomarker-driven study of ipilimumab plus nivolumab (ipi/nivo) For ARV7-positive metastatic castrate-resistant prostate cancer (MCRPC). In: American Society of Clinical Oncology Annual Meeting 2017; 02-Jun-2017, 2017. Available from: American Society of Clinical Oncology (ASCO) <a href="https://discovery.northernlight.com/document.php?datasource=PHE&amp;docid=PE20170614000002210&amp;context=WK%40northernlight.com">https://discovery.northernlight.com/document.php?datasource=PHE&amp;docid=PE20170614000002210&amp;context=WK%40northernlight.com</a> <a href="http://ovidsp.ovid.com/ovidweb.cgi?T=JS&amp;CSC=Y&amp;NEWS=N&amp;PAGE=fulltext&amp;D=dscv6&amp;AN=PE20170614000002210">http://ovidsp.ovid.com/ovidweb.cgi?T=JS&amp;CSC=Y&amp;NEWS=N&amp;PAGE=fulltext&amp;D=dscv6&amp;AN=PE20170614000002210</a>                                                  | Duplicate                 |

|                                                                                                                                                                                                                                                                                                                                                                                                                                                                                                                                                                                                                                                                                                                                                                                                                                                                                                                                                                                                                                                                                                           |                              |
|-----------------------------------------------------------------------------------------------------------------------------------------------------------------------------------------------------------------------------------------------------------------------------------------------------------------------------------------------------------------------------------------------------------------------------------------------------------------------------------------------------------------------------------------------------------------------------------------------------------------------------------------------------------------------------------------------------------------------------------------------------------------------------------------------------------------------------------------------------------------------------------------------------------------------------------------------------------------------------------------------------------------------------------------------------------------------------------------------------------|------------------------------|
| [30] Boudadi K, Suzman DL, Lubner B, Wang H, Silberstein J, Sullivan R, et al. Phase 2 biomarker-driven study of ipilimumab plus nivolumab (Ipi/Nivo) for ARV7-positive metastatic castrate-resistant prostate cancer (mCRPC). <i>J Clin Oncol</i> 2017.                                                                                                                                                                                                                                                                                                                                                                                                                                                                                                                                                                                                                                                                                                                                                                                                                                                  | Not relevant study design    |
| [31] Bowling L, Espenschied C, Jackson M, Mak B, LaDuca H. Gender Disparity: overlooking hereditary prostate cancer. In: American Society of Clinical Oncology Genitourinary Cancers Symposium 2017; 16-Feb-2017, 2017. Available from: American Society of Clinical Oncology (ASCO) <a href="https://discovery.northernlight.com/document.php?datasource=PHE&amp;docid=PE20170223020000060&amp;context=WK%40northernlight.com&amp;doctype=abstract&amp;docurl=http%3A%2F%2Fmeetinglibrary.asco.org%2Fcontent%2F179589-197&amp;token=351b27608e0aee43edf9449ed2eeec">https://discovery.northernlight.com/document.php?datasource=PHE&amp;docid=PE20170223020000060&amp;context=WK%40northernlight.com&amp;doctype=abstract&amp;docurl=http%3A%2F%2Fmeetinglibrary.asco.org%2Fcontent%2F179589-197&amp;token=351b27608e0aee43edf9449ed2eeec</a><br><a href="http://ovidsp.ovid.com/ovidweb.cgi?T=JS&amp;CSC=Y&amp;NEWS=N&amp;PAGE=fulltext&amp;D=dscv6&amp;AN=PE2017022302000060">http://ovidsp.ovid.com/ovidweb.cgi?T=JS&amp;CSC=Y&amp;NEWS=N&amp;PAGE=fulltext&amp;D=dscv6&amp;AN=PE2017022302000060</a> | Not a relevant population    |
| [32] Bristow RG, Ishkanian AS, Malloff C, Milosevic M, Pintilie M, Van Der Kwast T, et al. Use of genetic instability to predict biochemical recurrence in intermediate-risk prostate cancer. <i>J Clin Oncol</i> 2011.                                                                                                                                                                                                                                                                                                                                                                                                                                                                                                                                                                                                                                                                                                                                                                                                                                                                                   | No data (abstract)           |
| [33] Brown C, McDonald J, Abbas M, Dunston G, Kanaan Y, Ricks-Santi L. BRCA1 and BRCA2 mutational spectra in African American men with prostate cancer. <i>Cancer Epidemiol Biomark Prev</i> 2016.                                                                                                                                                                                                                                                                                                                                                                                                                                                                                                                                                                                                                                                                                                                                                                                                                                                                                                        | No data (abstract)           |
| [34] Brown K, Calip GS, Bernhisel R, Evans B, Rosenthal ET, Saam J, et al. Multi-gene hereditary cancer testing among men with breast cancer. <i>J Clin Oncol</i> 2017.                                                                                                                                                                                                                                                                                                                                                                                                                                                                                                                                                                                                                                                                                                                                                                                                                                                                                                                                   | Not a relevant population    |
| [35] Burger M, Denzinger S, Hammerschmied CG, Tannapfel A, Obermann EC, Wieland WF, et al. Elevated microsatellite alterations at selected tetranucleotides (EMAST) and mismatch repair gene expression in prostate cancer. <i>J Mol Med</i> 2006;84(10):833-841.                                                                                                                                                                                                                                                                                                                                                                                                                                                                                                                                                                                                                                                                                                                                                                                                                                         | No DDR mutation/not relevant |
| [36] Castro E, Goh C, Olmos D, Saunders E, Leongamornlert D, Tymrakiewicz M, et al. Germline BRCA mutations are associated with nodal involvement, distant metastasis and poor survival in prostate cancer. <i>Curr Oncol</i> 2012;19(2):e85.                                                                                                                                                                                                                                                                                                                                                                                                                                                                                                                                                                                                                                                                                                                                                                                                                                                             | No relevant outcome          |
| [37] Castro E, Olmos D, Goh CL, Saunders E, Leongamornlert D, Tymrakiewicz M, et al. BRCA carrier status as an independent prognostic factor associated with earlier biochemical relapse in local prostate cancer. <i>J Clin Oncol</i> 2012.                                                                                                                                                                                                                                                                                                                                                                                                                                                                                                                                                                                                                                                                                                                                                                                                                                                              | No relevant outcome          |
| [38] Castro E, Goh C, Olmos D, Saunders E, Leongamornlert D, Tymrakiewicz M, et al. Germline BRCA mutations are associated with higher risk of nodal involvement, distant metastasis, and poor survival outcomes in prostate cancer. <i>J Clin Oncol</i> 2013;31(14):1748-1757.                                                                                                                                                                                                                                                                                                                                                                                                                                                                                                                                                                                                                                                                                                                                                                                                                           | No relevant outcome          |
| [39] Castro E, Olmos D, Goh CL, Saunders E, Leongamornlert D, Tymrakiewicz M, et al. Effect of germ-line BRCA mutations in biochemical relapse and survival after treatment for localized prostate cancer. <i>J Clin Oncol</i> 2013.                                                                                                                                                                                                                                                                                                                                                                                                                                                                                                                                                                                                                                                                                                                                                                                                                                                                      | No relevant outcome          |
| [41] Castro E, Goh C, Leongamornlert D, Saunders E, Tymrakiewicz M, Dadaev T, et al. Effect of BRCA mutations on metastatic relapse and cause-specific survival after radical treatment for localised prostate cancer. <i>Eur Urol</i> 2015;68(2):186-193.                                                                                                                                                                                                                                                                                                                                                                                                                                                                                                                                                                                                                                                                                                                                                                                                                                                | No relevant outcome          |

|                                                                                                                                                                                                                                                                                                                                                                                                                                                                                                                                                                                                                                                                                                                                                                                                                                                                                                                                                                                                                                                                                                                                                                        |                           |
|------------------------------------------------------------------------------------------------------------------------------------------------------------------------------------------------------------------------------------------------------------------------------------------------------------------------------------------------------------------------------------------------------------------------------------------------------------------------------------------------------------------------------------------------------------------------------------------------------------------------------------------------------------------------------------------------------------------------------------------------------------------------------------------------------------------------------------------------------------------------------------------------------------------------------------------------------------------------------------------------------------------------------------------------------------------------------------------------------------------------------------------------------------------------|---------------------------|
| <p>[42] Cheng HH, Pritchard CC, Nelson P, Montgomery RB. Biallelic inactivation of BRCA2 in metastatic castration-resistant prostate cancer and platinum sensitivity. In: American Society of Clinical Oncology Genitourinary Cancers Symposium 2016; 07-Jan-2016, 2016. Available from: American Society of Clinical Oncology (ASCO) <a href="https://discovery.northernlight.com/document.php?datasource=PHE&amp;docid=PE20160202070001300&amp;context=WK%40northernlight.com&amp;doctype=abstract&amp;docurl=http%3A%2F%2Fmeetinglibrary.asco.org%2Fcontent%2F156239-172&amp;token=7d62a3d0c6916c8889c64b7dc56a40e2">https://discovery.northernlight.com/document.php?datasource=PHE&amp;docid=PE20160202070001300&amp;context=WK%40northernlight.com&amp;doctype=abstract&amp;docurl=http%3A%2F%2Fmeetinglibrary.asco.org%2Fcontent%2F156239-172&amp;token=7d62a3d0c6916c8889c64b7dc56a40e2</a><br/> <a href="http://ovidsp.ovid.com/ovidweb.cgi?T=JS&amp;CSC=Y&amp;NEWS=N&amp;PAGE=fulltext&amp;D=dscv6&amp;AN=PE20160202070001300">http://ovidsp.ovid.com/ovidweb.cgi?T=JS&amp;CSC=Y&amp;NEWS=N&amp;PAGE=fulltext&amp;D=dscv6&amp;AN=PE20160202070001300</a></p> | Duplicate                 |
| <p>[43] Cheng HH, Klemfuss N, Montgomery B, Higano CS, Schweizer MT, Mostaghel EA, et al. A pilot study of clinical targeted next generation sequencing for prostate cancer: consequences for treatment and genetic counseling. <i>Prostate</i> 2016;76(14):1303-1311.</p>                                                                                                                                                                                                                                                                                                                                                                                                                                                                                                                                                                                                                                                                                                                                                                                                                                                                                             | Not a relevant population |
| <p>[44] Cheng HH, Pritchard CC, Boyd T, Nelson PS, Montgomery B. Biallelic inactivation of BRCA2 in platinum-sensitive metastatic castration-resistant prostate cancer. <i>Eur Urol</i> 2016;69(6):992-995.</p>                                                                                                                                                                                                                                                                                                                                                                                                                                                                                                                                                                                                                                                                                                                                                                                                                                                                                                                                                        | Not relevant study design |
| <p>[45] Cheng HH, Klemfuss N, Montgomery RB, Higano CS, Schweizer MT, Mostaghel EA, et al. Pilot study of clinical targeted next generation sequencing for prostate cancer: Consequences for treatment and genetic counseling. <i>J Clin Oncol</i> 2016.</p>                                                                                                                                                                                                                                                                                                                                                                                                                                                                                                                                                                                                                                                                                                                                                                                                                                                                                                           | Not a relevant population |
| <p>[46] Cheng HH, Pritchard CC, Nelson P, Montgomery RB. Biallelic inactivation of BRCA2 in metastatic castration-resistant prostate cancer and platinum sensitivity. <i>J Clin Oncol</i> 2016.</p>                                                                                                                                                                                                                                                                                                                                                                                                                                                                                                                                                                                                                                                                                                                                                                                                                                                                                                                                                                    | Not relevant study design |
| <p>[47] Cheng ML, Abida W, Rathkopf DE, Arcila ME, Barron D, Autio KA, et al. Next-generation sequencing (NGS) of tissue and cell free DNA (CfDNA) to identify somatic and germline alterations in advanced prostate cancer. In: American Society of Clinical Oncology Annual Meeting 2017; 02-Jun-2017, 2017. Available from: American Society of Clinical Oncology (ASCO) <a href="https://discovery.northernlight.com/document.php?datasource=PHE&amp;docid=PE20170614070002110&amp;context=WK%40northernlight.com">https://discovery.northernlight.com/document.php?datasource=PHE&amp;docid=PE20170614070002110&amp;context=WK%40northernlight.com</a><br/> <a href="http://ovidsp.ovid.com/ovidweb.cgi?T=JS&amp;CSC=Y&amp;NEWS=N&amp;PAGE=fulltext&amp;D=dscv6&amp;AN=PE20170614070002110">http://ovidsp.ovid.com/ovidweb.cgi?T=JS&amp;CSC=Y&amp;NEWS=N&amp;PAGE=fulltext&amp;D=dscv6&amp;AN=PE20170614070002110</a></p>                                                                                                                                                                                                                                         | Duplicate                 |
| <p>[48] Chi KN, Annala M, Sunderland K, Khalaf D, Finch D, Oja CD, et al. A randomized phase ii cross-over study of abiraterone + prednisone (ABI) vs enzalutamide (ENZ) for patients (pts) with metastatic, castration-resistant prostate cancer (MCRPC). In: American Society of Clinical Oncology Annual Meeting 2017; 02-Jun-2017, 2017. Available from: American Society of Clinical Oncology (ASCO) <a href="https://discovery.northernlight.com/document.php?datasource=PHE&amp;docid=PE20170614070002060&amp;context=WK%40northernlight.com">https://discovery.northernlight.com/document.php?datasource=PHE&amp;docid=PE20170614070002060&amp;context=WK%40northernlight.com</a><br/> <a href="http://ovidsp.ovid.com/ovidweb.cgi?T=JS&amp;CSC=Y&amp;NEWS=N&amp;PAGE=fulltext&amp;D=dscv6&amp;AN=PE20170614070002060">http://ovidsp.ovid.com/ovidweb.cgi?T=JS&amp;CSC=Y&amp;NEWS=N&amp;PAGE=fulltext&amp;D=dscv6&amp;AN=PE20170614070002060</a></p>                                                                                                                                                                                                           | Duplicate                 |



|                                                                                                                                                                                                                                                                                                                                                                                                                                                                                                                                                                                                                                                                                                                                                                                                                                                                                                                                                                 |                              |
|-----------------------------------------------------------------------------------------------------------------------------------------------------------------------------------------------------------------------------------------------------------------------------------------------------------------------------------------------------------------------------------------------------------------------------------------------------------------------------------------------------------------------------------------------------------------------------------------------------------------------------------------------------------------------------------------------------------------------------------------------------------------------------------------------------------------------------------------------------------------------------------------------------------------------------------------------------------------|------------------------------|
| 2060                                                                                                                                                                                                                                                                                                                                                                                                                                                                                                                                                                                                                                                                                                                                                                                                                                                                                                                                                            |                              |
| [49] Chi KN, Annala M, Sunderland K, Khalaf D, Finch D, Oja CD, et al. A randomized phase II cross-over study of abiraterone + prednisone (ABI) vs enzalutamide (ENZ) for patients (pts) with metastatic, castration-resistant prostate cancer (mCRPC). <i>J Clin Oncol</i> 2017.                                                                                                                                                                                                                                                                                                                                                                                                                                                                                                                                                                                                                                                                               | No relevant outcome          |
| [50] Chiorean EG, McDonough S, Philip PA, Swisher EM, Pishvaian MJ, Guthrie K, et al. Randomized phase II study of 2nd-line FOLFIRI versus modified FOLFIRI with PARP inhibitor ABT-888 (Veliparib) (NSC-737664) in metastatic pancreatic cancer (MPC): SWOG S1513. In: American Society of Clinical Oncology Annual Meeting 2017; 02-Jun-2017, 2017. Available from: American Society of Clinical Oncology (ASCO) <a href="https://discovery.northernlight.com/document.php?datasource=PHE&amp;docid=PE20170614080001880&amp;context=WK%40northernlight.com">https://discovery.northernlight.com/document.php?datasource=PHE&amp;docid=PE20170614080001880&amp;context=WK%40northernlight.com</a><br><a href="http://ovidsp.ovid.com/ovidweb.cgi?T=JS&amp;CSC=Y&amp;NEWS=N&amp;PAGE=fulltext&amp;D=dscv6&amp;AN=PE20170614080001880">http://ovidsp.ovid.com/ovidweb.cgi?T=JS&amp;CSC=Y&amp;NEWS=N&amp;PAGE=fulltext&amp;D=dscv6&amp;AN=PE20170614080001880</a> | Not a relevant population    |
| [51] Christie Hospital NHS Foundation Trust. Study of DNA mutations in predicting the effect of external-beam radiation therapy in patients with early breast cancer, localized prostate cancer, or gynecological cancer. NCT00601406. In: WHO International Clinical Trials Registry Platform (ICTRP) [Internet]. Geneva: World Health Organization (WHO). 2008 [accessed 12.12.17]. Available from: <a href="http://clinicaltrials.gov/show/NCT00601406">http://clinicaltrials.gov/show/NCT00601406</a>                                                                                                                                                                                                                                                                                                                                                                                                                                                       | Not relevant study design    |
| [52]. Bell DW, Kim SH, Godwin AK, Schiripo TA, Harris PL, Haserlat SM, et al. Genetic and functional analysis of CHEK2 (CHK2) variants in multiethnic cohorts. <i>Int J Cancer</i> 2007;121(12):2661-2667.                                                                                                                                                                                                                                                                                                                                                                                                                                                                                                                                                                                                                                                                                                                                                      | Not a relevant population    |
| [53] Cintra HS, Pinezi JC, Machado GD, de Carvalho GM, Carvalho AT, dos Santos TE, et al. Investigation of genetic polymorphisms related to the outcome of radiotherapy for prostate cancer patients. <i>Dis Markers</i> 2013;35(6):701-710.                                                                                                                                                                                                                                                                                                                                                                                                                                                                                                                                                                                                                                                                                                                    | Not a relevant population    |
| [54] Cintra HS, Pinezi JCD, Carvalho ATS, Santos TED, Marciano RD, Soares RBA. Investigation of ATM, TP53 and MDM2 polymorphisms and their association with outcome of radiotherapy for prostate cancer. <i>BMC Proceedings</i> 2013.                                                                                                                                                                                                                                                                                                                                                                                                                                                                                                                                                                                                                                                                                                                           | No data (abstract)           |
| [55] Clarke NW, Shepard R, Spencer S, Jones RH. Olaparib combined with abiraterone in patients with metastatic prostate cancer: Safety run-in from a phase II study. <i>J Clin Oncol</i> 2015.                                                                                                                                                                                                                                                                                                                                                                                                                                                                                                                                                                                                                                                                                                                                                                  | No DDR mutation/not relevant |
| [56] Cliniques universitaires Saint-Luc- Université Catholique de Louvain. Evaluation and predictive value of genetic polymorphisms in the management of hormonal treatment of prostate cancer. NCT02440802. In: WHO International Clinical Trials Registry Platform (ICTRP) [Internet]. Geneva: World Health Organization (WHO). 2015 [accessed 12.12.17]. Available from: <a href="https://clinicaltrials.gov/show/NCT02440802">https://clinicaltrials.gov/show/NCT02440802</a>                                                                                                                                                                                                                                                                                                                                                                                                                                                                               | No DDR mutation/not relevant |
| [57] Clovis Oncology Inc. A study of rucaparib verses physician's choice of therapy in patients with metastatic castration-resistant prostate cancer and homologous recombination gene deficiency. NCT02975934. In: WHO International Clinical Trials Registry Platform (ICTRP) [Internet]. Geneva: World Health Organization (WHO). 2016 [accessed 12.12.17]. Available from: <a href="https://clinicaltrials.gov/show/NCT02975934">https://clinicaltrials.gov/show/NCT02975934</a>                                                                                                                                                                                                                                                                                                                                                                                                                                                                            | No relevant outcome          |

|                                                                                                                                                                                                                                                                                                                                                                                                                                                                                                                                                                                                                                                                                                                                                                                                                                                                                                                                                                                                                                                                                                                                                     |                           |
|-----------------------------------------------------------------------------------------------------------------------------------------------------------------------------------------------------------------------------------------------------------------------------------------------------------------------------------------------------------------------------------------------------------------------------------------------------------------------------------------------------------------------------------------------------------------------------------------------------------------------------------------------------------------------------------------------------------------------------------------------------------------------------------------------------------------------------------------------------------------------------------------------------------------------------------------------------------------------------------------------------------------------------------------------------------------------------------------------------------------------------------------------------|---------------------------|
| [58] Clovis Oncology I. A study of rucaparib in patients with metastatic castration-resistant prostate cancer and homologous recombination gene deficiency. NCT02952534. In: WHO International Clinical Trials Registry Platform (ICTRP) [Internet]. Geneva: World Health Organization (WHO). 2016 [accessed 12.12.17]. Available from: <a href="https://clinicaltrials.gov/show/NCT02952534">https://clinicaltrials.gov/show/NCT02952534</a>                                                                                                                                                                                                                                                                                                                                                                                                                                                                                                                                                                                                                                                                                                       | Duplicate                 |
| [59] Clovis Oncology I. A study to evaluate rucaparib versus physician's choice of therapy in patients with metastatic castration-resistant prostate cancer. EUCTR2016-003163-20-GB. In: WHO International Clinical Trials Registry Platform (ICTRP) [Internet]. Geneva: World Health Organization (WHO). 2017 [accessed 12.12.17]. Available from: <a href="https://www.clinicaltrialsregister.eu/ctr-search/search?query=eudract_number:2016-003163-20">https://www.clinicaltrialsregister.eu/ctr-search/search?query=eudract_number:2016-003163-20</a>                                                                                                                                                                                                                                                                                                                                                                                                                                                                                                                                                                                           | No relevant outcome       |
| [60] Clovis Oncology Inc, Foundation Medicine. A study of rucaparib in patients with metastatic castration-resistant prostate cancer and homologous recombination gene deficiency. NCT02952534. In: ClinicalTrials.gov [Internet]. Bethesda (MD): National Library of Medicine (US). 2019 [accessed 11.12.17]. Available from: <a href="https://ClinicalTrials.gov/show/NCT02952534">https://ClinicalTrials.gov/show/NCT02952534</a>                                                                                                                                                                                                                                                                                                                                                                                                                                                                                                                                                                                                                                                                                                                | No relevant outcome       |
| [61] Clovis Oncology Inc, Foundation Medicine. A study of rucaparib versus physician's choice of therapy in patients with metastatic castration-resistant prostate cancer and homologous recombination gene deficiency. NCT02975934. In: ClinicalTrials.gov [Internet]. Bethesda (MD): National Library of Medicine (US). 2022 [accessed 11.12.17]. Available from: <a href="https://ClinicalTrials.gov/show/NCT02975934">https://ClinicalTrials.gov/show/NCT02975934</a>                                                                                                                                                                                                                                                                                                                                                                                                                                                                                                                                                                                                                                                                           | Duplicate                 |
| [62] Corcoran NM, Clarkson MJ, Stuchbery R, McCoy P, Hovens CM. Aberrations in DNA repair pathway genes are enriched in human metastasis. <i>BJU Int</i> 2016.                                                                                                                                                                                                                                                                                                                                                                                                                                                                                                                                                                                                                                                                                                                                                                                                                                                                                                                                                                                      | No data (abstract)        |
| [63] Cybulski C. Selected aspects of inherited susceptibility to prostate cancer and tumours of different site of origin. <i>Hered Cancer Clin Pract</i> 2007;5(3):164-179.                                                                                                                                                                                                                                                                                                                                                                                                                                                                                                                                                                                                                                                                                                                                                                                                                                                                                                                                                                         | Not primary research      |
| [64] Cybulski C, Wokolorczyk D, Kluzniak W, Kashyap A, Golab A, Slojewski M, et al. A personalised approach to prostate cancer screening based on genotyping of risk founder alleles. <i>Br J Cancer</i> 2013;108(12):2601-2609.                                                                                                                                                                                                                                                                                                                                                                                                                                                                                                                                                                                                                                                                                                                                                                                                                                                                                                                    | Not a relevant population |
| [65] Dall'Era M, Glass A, Lara P, Hartmaier R, deVere RW, McPherson J. Frequency of DNA repair gene mutations in localized and metastatic prostate cancer. In: American Society of Clinical Oncology Genitourinary Cancers Symposium 2017; 16-Feb-2017, 2017. Available from: American Society of Clinical Oncology (ASCO) <a href="https://discovery.northernlight.com/document.php?datasource=PHE&amp;docid=PE20170223050000060&amp;context=WK%40northernlight.com&amp;doctype=abstract&amp;docurl=http%3A%2F%2Fmeetinglibrary.asco.org%2Fcontent%2F179460-197&amp;token=6c8fa3dcb8f6bc79c4bb3ea2302ea70e">https://discovery.northernlight.com/document.php?datasource=PHE&amp;docid=PE20170223050000060&amp;context=WK%40northernlight.com&amp;doctype=abstract&amp;docurl=http%3A%2F%2Fmeetinglibrary.asco.org%2Fcontent%2F179460-197&amp;token=6c8fa3dcb8f6bc79c4bb3ea2302ea70e</a><br><a href="http://ovidsp.ovid.com/ovidweb.cgi?T=JS&amp;CSC=Y&amp;NEWS=N&amp;PAGE=fulltext&amp;D=dscv6&amp;AN=PE2017022305000060">http://ovidsp.ovid.com/ovidweb.cgi?T=JS&amp;CSC=Y&amp;NEWS=N&amp;PAGE=fulltext&amp;D=dscv6&amp;AN=PE2017022305000060</a> | Duplicate                 |
| [66] Daniel S, Gornstein E, Frampton GM, Sun J, Morley S, Heilmann A, et al. BRCA1/2 Reversion mutations in prostate cancer identified from clinical tissue and liquid biopsy samples. In: American Society of Clinical Oncology Annual Meeting 2017; 02-Jun-2017, 2017. Available from: American Society of Clinical Oncology (ASCO)                                                                                                                                                                                                                                                                                                                                                                                                                                                                                                                                                                                                                                                                                                                                                                                                               | Duplicate                 |

|                                                                                                                                                                                                                                                                                                                                                                                                                                                                                                                                                                                                                                                                                                                                                                                                                                                                                                                                                                                                                                                                                                                                                                                                                                                                     |                              |
|---------------------------------------------------------------------------------------------------------------------------------------------------------------------------------------------------------------------------------------------------------------------------------------------------------------------------------------------------------------------------------------------------------------------------------------------------------------------------------------------------------------------------------------------------------------------------------------------------------------------------------------------------------------------------------------------------------------------------------------------------------------------------------------------------------------------------------------------------------------------------------------------------------------------------------------------------------------------------------------------------------------------------------------------------------------------------------------------------------------------------------------------------------------------------------------------------------------------------------------------------------------------|------------------------------|
| <p><a href="https://discovery.northernlight.com/document.php?datasource=PHE&amp;docid=PE20170614020002170&amp;context=WK%40northernlight.com">https://discovery.northernlight.com/document.php?datasource=PHE&amp;docid=PE20170614020002170&amp;context=WK%40northernlight.com</a><br/> <a href="http://ovidsp.ovid.com/ovidweb.cgi?T=JS&amp;CSC=Y&amp;NEWS=N&amp;PAGE=fulltext&amp;D=dscv6&amp;AN=PE20170614020002170">http://ovidsp.ovid.com/ovidweb.cgi?T=JS&amp;CSC=Y&amp;NEWS=N&amp;PAGE=fulltext&amp;D=dscv6&amp;AN=PE20170614020002170</a></p>                                                                                                                                                                                                                                                                                                                                                                                                                                                                                                                                                                                                                                                                                                               |                              |
| <p>[67] Davidson CJ, Walker S, McCabe N, Hill L, Parkes E, Jain S, et al. An innate immune response to intrinsic DNA damage predicts resistance to docetaxel in prostate cancer. In: European Society for Medical Oncology Congress 2016; 07-Oct-2016, 2016. Available from: European Society for Medical Oncology (ESMO)<br/> <a href="https://discovery.northernlight.com/document.php?datasource=PHE&amp;docid=PE20161025710000950&amp;context=WK%40northernlight.com&amp;doctype=abstract&amp;docurl=http%3A%2F%2Fwww.esmo.org%2Fcontent%2Fdownload%2F88721%2F1622334%2Ffile%2FESMO-2016-abstracts.pdf%23page%3D268&amp;token=1df42a332125cd0b231b576affac32d">https://discovery.northernlight.com/document.php?datasource=PHE&amp;docid=PE20161025710000950&amp;context=WK%40northernlight.com&amp;doctype=abstract&amp;docurl=http%3A%2F%2Fwww.esmo.org%2Fcontent%2Fdownload%2F88721%2F1622334%2Ffile%2FESMO-2016-abstracts.pdf%23page%3D268&amp;token=1df42a332125cd0b231b576affac32d</a><br/> <a href="http://ovidsp.ovid.com/ovidweb.cgi?T=JS&amp;CSC=Y&amp;NEWS=N&amp;PAGE=fulltext&amp;D=dscv6&amp;AN=PE20161025710000950">http://ovidsp.ovid.com/ovidweb.cgi?T=JS&amp;CSC=Y&amp;NEWS=N&amp;PAGE=fulltext&amp;D=dscv6&amp;AN=PE20161025710000950</a></p> | Duplicate                    |
| <p>[68] Davidson CJ, Walker S, McCabe N, Hill L, Parkes E, Jain S, et al. An innate immune response to intrinsic DNA damage predicts resistance to docetaxel in prostate cancer. <i>Ann Oncol</i> 2016.</p>                                                                                                                                                                                                                                                                                                                                                                                                                                                                                                                                                                                                                                                                                                                                                                                                                                                                                                                                                                                                                                                         | No DDR mutation/not relevant |
| <p>[69] Dawson NA, Heath EI, Feldman R, Reddy SK, Spetzler D, Poste GH, et al. Use of panomic assessment to reveal DNA repair alterations and to predict potential therapeutic response to taxane-platinum combination therapy in prostate cancer. In: American Society of Clinical Oncology Annual Meeting 2016; 03-Jun-2016, 2016. Available from: American Society of Clinical Oncology (ASCO)<br/> <a href="https://discovery.northernlight.com/document.php?datasource=PHE&amp;docid=PE20160617030000961&amp;context=WK%40northernlight.com&amp;doctype=abstract&amp;docurl=http%3A%2F%2Fmeetinglibrary.asco.org%2Fcontent%2F169293-176&amp;token=e02e1ed54f93f58ea46b8572f93fd612">https://discovery.northernlight.com/document.php?datasource=PHE&amp;docid=PE20160617030000961&amp;context=WK%40northernlight.com&amp;doctype=abstract&amp;docurl=http%3A%2F%2Fmeetinglibrary.asco.org%2Fcontent%2F169293-176&amp;token=e02e1ed54f93f58ea46b8572f93fd612</a><br/> <a href="http://ovidsp.ovid.com/ovidweb.cgi?T=JS&amp;CSC=Y&amp;NEWS=N&amp;PAGE=fulltext&amp;D=dscv6&amp;AN=PE20160617030000961">http://ovidsp.ovid.com/ovidweb.cgi?T=JS&amp;CSC=Y&amp;NEWS=N&amp;PAGE=fulltext&amp;D=dscv6&amp;AN=PE20160617030000961</a></p>                             | Duplicate                    |
| <p>[70] De Bono JS, Hussain M, Thiery-Vuillemin A, Mateo J, Sartor AO, Chi KN, et al. PROfound: A randomized phase III trial evaluating olaparib in patients with metastatic castration-resistant prostate cancer and a deleterious homologous recombination DNA repair aberration. <i>J Clin Oncol</i> 2017.</p>                                                                                                                                                                                                                                                                                                                                                                                                                                                                                                                                                                                                                                                                                                                                                                                                                                                                                                                                                   | No relevant outcome          |
| <p>[71] Dhawan MS, Bartelink IH, Aggarwal RR, Leng J, Zhang JZ, Pawlowska N, et al. Differential toxicity in patients with and without DNA repair mutations: Phase I study of carboplatin and talazoparib in advanced solid tumors. <i>Clin Cancer Res</i> 2017;23(21):6400-6410.</p>                                                                                                                                                                                                                                                                                                                                                                                                                                                                                                                                                                                                                                                                                                                                                                                                                                                                                                                                                                               | No relevant outcome          |
| <p>[72] Dombernowsky SL, Weischer M, Hojgaard Allin K, Bojesen SE, Tybjaerg-Hansen A, Nordestgaard BG. Risk of cancer by ATM missense mutations in the general population. <i>J Clin Oncol</i> 2008;26(15 suppl):11036.</p>                                                                                                                                                                                                                                                                                                                                                                                                                                                                                                                                                                                                                                                                                                                                                                                                                                                                                                                                                                                                                                         | No relevant outcome          |
| <p>[73] Douglas JA, Levin AM, Zuhlke KA, Ray AM, Johnson GR, Lange EM, et al. Common variation in the BRCA1 gene and prostate cancer risk. <i>Cancer Epidemiol Biomarkers Prev</i> 2007;16(7):1510-1516.</p>                                                                                                                                                                                                                                                                                                                                                                                                                                                                                                                                                                                                                                                                                                                                                                                                                                                                                                                                                                                                                                                        | Not a relevant population    |

|                                                                                                                                                                                                                                                                                                                                                                                                                                                                                                                                                                                                                                                                                                                                                                                                                                                                                                                                                                              |                              |
|------------------------------------------------------------------------------------------------------------------------------------------------------------------------------------------------------------------------------------------------------------------------------------------------------------------------------------------------------------------------------------------------------------------------------------------------------------------------------------------------------------------------------------------------------------------------------------------------------------------------------------------------------------------------------------------------------------------------------------------------------------------------------------------------------------------------------------------------------------------------------------------------------------------------------------------------------------------------------|------------------------------|
| [74] Dulaney C, Rais-Bahrami S, Della Manna D, Gordetsky J, Nix J, Yang ES. Clinical and radiographic correlates of canonical cancer pathway deregulation in malignant intraprostatic lesions. <i>Int J Radiat Oncol</i> 2016.                                                                                                                                                                                                                                                                                                                                                                                                                                                                                                                                                                                                                                                                                                                                               | No DDR mutation/not relevant |
| [75] Dulaney CR, Rais-Bahrami S, Manna DD, Gordetsky JB, Nix JW, Yang ES. DNA repair deregulation in discrete prostate cancer lesions identified on multi-parametric MRI and targeted by MRI/ultrasound fusion-guided biopsy. <i>Oncotarget</i> 2017;8(40):68038-68046.                                                                                                                                                                                                                                                                                                                                                                                                                                                                                                                                                                                                                                                                                                      | No DDR mutation/not relevant |
| [76] Eeles R, Castro E, Olmos D, Saunders E, Leongamornlert D, Tymrakiewicz M, et al. Effect of BRCA mutations on biochemical relapse and survival after treatment for localized prostate cancer. <i>Curr Oncol</i> 2014;21(2):e362.                                                                                                                                                                                                                                                                                                                                                                                                                                                                                                                                                                                                                                                                                                                                         | No relevant outcome          |
| [77] Efstathiou E, Tsikkinis A, Wen S, Li Ning Tapia E, Hoang A, Aparicio A, et al. Abiraterone acetate (AA) followed by randomization to dasatinib (D) or sunitinib malate (S) in metastatic castrate resistant prostate cancer (mCRPC). <i>Ann Oncol</i> 2016.                                                                                                                                                                                                                                                                                                                                                                                                                                                                                                                                                                                                                                                                                                             | No DDR mutation/not relevant |
| [78] El-Saghire H, Vandevorde C, Ost P, Monsieurs P, Michaux A, De Meerleer G, et al. Intensity modulated radiotherapy induces pro-inflammatory and pro-survival responses in prostate cancer patients. <i>Int J Oncol</i> 2014;44(4):1073-1083.                                                                                                                                                                                                                                                                                                                                                                                                                                                                                                                                                                                                                                                                                                                             | No DDR mutation/not relevant |
| [79] Evans JR, Zhao SG, Tomlins SA, Knudsen KE, De Bono JS, Rubin MA, et al. Patient-level DNA damage and repair pathway profiles are prognostic after prostatectomy for high-risk prostate cancer. <i>Int J Radiat Oncol Biol Phys</i> 2015;93(3 SUPPL. 1):S134-S135.                                                                                                                                                                                                                                                                                                                                                                                                                                                                                                                                                                                                                                                                                                       | No DDR mutation/not relevant |
| [80] Fachal L, Gomez-Caamano A, Peleteiro P, Carballo A, Calvo-Crespo P, Sanchez-Garcia M, et al. Association of a XRCC3 polymorphism and rectum mean dose with the risk of acute radio-induced gastrointestinal toxicity in prostate cancer patients. <i>Radiother Oncol</i> 2012;105(3):321-328.                                                                                                                                                                                                                                                                                                                                                                                                                                                                                                                                                                                                                                                                           | Not a relevant population    |
| [81] Fachal L, Gomez-Caamano A, Peleteiro P, Carballo A, Calvo-Crespo P, Sanchez-Garcia M, et al. SNPS in DNA repair and damage detection genes and acute normal tissue toxicity in prostate cancer patients. <i>Radiother Oncol</i> 2012;103:S213.                                                                                                                                                                                                                                                                                                                                                                                                                                                                                                                                                                                                                                                                                                                          | Not a relevant population    |
| [82] Farooqi AA, Kamran Majeed SM, Mansoor Q, Ismail M. Population-specific genetic variation at microRNA-629-binding site in the 3'-UTR of NBS1 gene in prostate cancer patients. <i>J Exp Ther Oncol</i> 2017;11(2):161-163.                                                                                                                                                                                                                                                                                                                                                                                                                                                                                                                                                                                                                                                                                                                                               | No DDR mutation/not relevant |
| [83] Feldman R, Reddy SK, Gatalica Z, Mahanes JR, Myers CE. Biomarker patterns of localized and metastatic prostate cancer. <i>J Clin Oncol</i> 2015.                                                                                                                                                                                                                                                                                                                                                                                                                                                                                                                                                                                                                                                                                                                                                                                                                        | No data (abstract)           |
| [84] Feng FY, Daignault-Newton S, Jendrisak A, Wang Y, Greene S, Rodriguez A, et al. Prediction of PARP inhibitor response and resistance utilizing a CTC phenotypic classifier in patients (pts) with metastatic castration-resistant prostate cancer (MCRPC): Results from the NCI 9012 trial. In: European Society for Medical Oncology Congress 2016; 07-Oct-2016, 2016. Available from: European Society for Medical Oncology (ESMO) <a href="https://discovery.northernlight.com/document.php?datasource=PHE&amp;docid=PE2016102587000083&amp;context=WK%40northernlight.com">https://discovery.northernlight.com/document.php?datasource=PHE&amp;docid=PE2016102587000083&amp;context=WK%40northernlight.com</a><br><a href="http://ovidsp.ovid.com/ovidweb.cgi?T=JS&amp;CSC=Y&amp;NEWS=N&amp;PAGE=fulltext&amp;D=dscv6&amp;AN=PE2016102587000">http://ovidsp.ovid.com/ovidweb.cgi?T=JS&amp;CSC=Y&amp;NEWS=N&amp;PAGE=fulltext&amp;D=dscv6&amp;AN=PE2016102587000</a> | Duplicate                    |

|                                                                                                                                                                                                                                                                                                                                                                                                                                                                                                                                                                                                                                                                                                                                                                                                                                                                                                                                                                                                                   |                              |
|-------------------------------------------------------------------------------------------------------------------------------------------------------------------------------------------------------------------------------------------------------------------------------------------------------------------------------------------------------------------------------------------------------------------------------------------------------------------------------------------------------------------------------------------------------------------------------------------------------------------------------------------------------------------------------------------------------------------------------------------------------------------------------------------------------------------------------------------------------------------------------------------------------------------------------------------------------------------------------------------------------------------|------------------------------|
| 0830                                                                                                                                                                                                                                                                                                                                                                                                                                                                                                                                                                                                                                                                                                                                                                                                                                                                                                                                                                                                              |                              |
| [85] Feng FY, Daignault-Newton S, Jendrisak A, Wang Y, Greene S, Rodriguez A, et al. Prediction of PARP inhibitor response and resistance utilizing a CTC phenotypic classifier in patients (pts) with metastatic castration-resistant prostate cancer (mCRPC): Results from the NCI 9012 trial. <i>Ann Oncol</i> 2016.                                                                                                                                                                                                                                                                                                                                                                                                                                                                                                                                                                                                                                                                                           | No DDR mutation/not relevant |
| [86] Fong PC, Boss DS, Yap TA, Tutt A, Wu P, Mergui-Roelvink M, et al. Inhibition of poly(ADP-ribose) polymerase in tumors from BRCA mutation carriers. <i>N Engl J Med</i> 2009;361(2):123-134.                                                                                                                                                                                                                                                                                                                                                                                                                                                                                                                                                                                                                                                                                                                                                                                                                  | Not a relevant population    |
| [87] Foulkes WD. DNA-repair gene mutations in metastatic prostate cancer. <i>N Engl J Med</i> 2016:1803-1803.                                                                                                                                                                                                                                                                                                                                                                                                                                                                                                                                                                                                                                                                                                                                                                                                                                                                                                     | Not primary research         |
| [88] Freedland S, Aronson W. Commentary on "Biallelic inactivation of BRCA2 in platinum-sensitive metastatic castration-resistant prostate cancer". Cheng HH, Pritchard CC, Boyd T, Nelson PS, Montgomery B. <i>Eur Urol</i> . Jun 2016;69(6):992-995. <i>Urol Oncol</i> 2017;35(8):536.                                                                                                                                                                                                                                                                                                                                                                                                                                                                                                                                                                                                                                                                                                                          | Not primary research         |
| [89] Freedland SJ, Aronson WJ. Commentary on "Integrative clinical genomics of advanced prostate cancer". Robinson D, Van Allen EM, Wu YM, Schultz N, Lonigro RJ, Mosquera JM, Montgomery B, Taplin ME, Pritchard CC, Attard G, Beltran H, Abida W, Bradley RK, Vinson J, Cao X, Vats P, Kunju LP, Hussain M, Feng FY, Tomlins SA, Cooney KA, Smith DC, Brennan C, Siddiqui J, Mehra R, Chen Y, Rathkopf DE, Morris MJ, Solomon SB, Durack JC, Reuter VE, Gopalan A, Gao J, Loda M, Lis RT, Bowden M, Balk SP, Gaviola G, Sougnez C, Gupta M, Yu EY, Mostaghel EA, Cheng HH, Mulcahy H, True LD, Plymate SR, Dvigne H, Ferraldeschi R, Flohr P, Miranda S, Zafeiriou Z, Tunariu N, Mateo J, Perez-Lopez R, Demichelis F, Robinson BD, Schiffman M, Nanus DM, Tagawa ST, Sigaras A, Eng KW, Elemento O, Sboner A, Heath EI, Scher HI, Pienta KJ, Kantoff P, de Bono JS, Rubin MA, Nelson PS, Garraway LA, Sawyers CL, Chinnaiyan AM. <i>Cell</i> . 21 May 2015;161(5):1215-1228. <i>Urol Oncol</i> 2017;35(8):535. | Not primary research         |
| [90] Freedland SJ, Aronson WJ. Commentary on "Inherited DNA-repair gene mutations in men with metastatic prostate cancer". Pritchard CC, Mateo J, Walsh MF, De Sarkar N, Abida W, Beltran H, Garofalo A, Gulati R, Carreira S, Eeles R, Elemento O, Rubin MA, Robinson D, Lonigro R, Hussain M, Chinnaiyan A, Vinson J, Filipenko J, Garraway L, Taplin ME, AlDubayan S, Han GC, Beightol M, Morrissey C, Nghiem B, Cheng HH, Montgomery B, Walsh T, Casadei S, Berger M, Zhang L, Zehir A, Vijai J, Scher HI, Sawyers C, Schultz N, Kantoff PW, Solit D, Robson M, Van Allen EM, Offit K, de Bono J, Nelson PS. <i>N Engl J Med</i> . 2016;375(5):443-53. <i>Urol Oncol</i> 2017;35(8):536-537.                                                                                                                                                                                                                                                                                                                  | Not primary research         |
| [91] Gao X, Porter AT, Honn KV. Involvement of the multiple tumor suppressor genes and 12-lipoxygenase in human prostate cancer. Therapeutic implications. <i>Adv Exp Med Biol</i> 1997;407:41-53.                                                                                                                                                                                                                                                                                                                                                                                                                                                                                                                                                                                                                                                                                                                                                                                                                | Not primary research         |
| [92] Glass A, Lara P, Hartmaier R, White Rd, McPherson J, Dall'Era M. Frequency of DNA Repair Gene Mutations in Localized and Metastatic Prostate Cancer. In: American Urological Association Annual Meeting 2017; 12-May-2017, 2017. Available from: American Urological Association (AUA) <a href="https://discovery.northernlight.com/document.php?datasource=PHE&amp;docid=PE20170518010000050&amp;context=WK%40northernlight.com">https://discovery.northernlight.com/document.php?datasource=PHE&amp;docid=PE20170518010000050&amp;context=WK%40northernlight.com</a>                                                                                                                                                                                                                                                                                                                                                                                                                                       | Duplicate                    |

|                                                                                                                                                                                                                                                                                                                                                                                                                                                                                                                                                                                                                                                                                                                                                                                                                                                                                                                                                                                                                                                                                                                                                                                                                                     |                              |
|-------------------------------------------------------------------------------------------------------------------------------------------------------------------------------------------------------------------------------------------------------------------------------------------------------------------------------------------------------------------------------------------------------------------------------------------------------------------------------------------------------------------------------------------------------------------------------------------------------------------------------------------------------------------------------------------------------------------------------------------------------------------------------------------------------------------------------------------------------------------------------------------------------------------------------------------------------------------------------------------------------------------------------------------------------------------------------------------------------------------------------------------------------------------------------------------------------------------------------------|------------------------------|
| <a href="http://ovidsp.ovid.com/ovidweb.cgi?T=JS&amp;CSC=Y&amp;NEWS=N&amp;PAGE=fulltext&amp;D=dscv6&amp;AN=PE2017051801000050">http://ovidsp.ovid.com/ovidweb.cgi?T=JS&amp;CSC=Y&amp;NEWS=N&amp;PAGE=fulltext&amp;D=dscv6&amp;AN=PE2017051801000050</a>                                                                                                                                                                                                                                                                                                                                                                                                                                                                                                                                                                                                                                                                                                                                                                                                                                                                                                                                                                             |                              |
| [93] Golan T, Oh D-Y, Reni M, Macarulla TM, Tortora G, Hall MJ, et al. POLO: A randomized phase III trial of olaparib maintenance monotherapy in patients (pts) with metastatic pancreatic cancer (MPC) who have a germline BRCA1/2 mutation (GBRCAm). In: American Society of Clinical Oncology Annual Meeting 2016; 03-Jun-2016, 2016. Available from: American Society of Clinical Oncology (ASCO)<br><a href="https://discovery.northernlight.com/document.php?datasource=PHE&amp;docid=PE20160617990000670&amp;context=WK%40northernlight.com&amp;doctype=abstract&amp;docurl=http%3A%2F%2Fmeetinglibrary.asco.org%2Fcontent%2F165421-176&amp;token=23da85c589294515d5108c1f65afaf74">https://discovery.northernlight.com/document.php?datasource=PHE&amp;docid=PE20160617990000670&amp;context=WK%40northernlight.com&amp;doctype=abstract&amp;docurl=http%3A%2F%2Fmeetinglibrary.asco.org%2Fcontent%2F165421-176&amp;token=23da85c589294515d5108c1f65afaf74</a><br><a href="http://ovidsp.ovid.com/ovidweb.cgi?T=JS&amp;CSC=Y&amp;NEWS=N&amp;PAGE=fulltext&amp;D=dscv6&amp;AN=PE20160617990000670">http://ovidsp.ovid.com/ovidweb.cgi?T=JS&amp;CSC=Y&amp;NEWS=N&amp;PAGE=fulltext&amp;D=dscv6&amp;AN=PE20160617990000670</a> | Duplicate                    |
| [94] Golan T, Oh DY, Reni M, Macarulla TM, Tortora G, Hall MJ, et al. POLO: A randomized phase III trial of olaparib maintenance monotherapy in patients (pts) with metastatic pancreatic cancer (mPC) who have a germline BRCA1/2 mutation (gBRCAm). J Clin Oncol 2016.                                                                                                                                                                                                                                                                                                                                                                                                                                                                                                                                                                                                                                                                                                                                                                                                                                                                                                                                                            | Not a relevant population    |
| [95] Goodall J, Mateo J, Yuan W, Mossop H, Porta N, Miranda S, et al. Circulating cell-free DNA to guide prostate cancer treatment with parp inhibition. Cancer Discovery 2017;7(9):1006-1017.                                                                                                                                                                                                                                                                                                                                                                                                                                                                                                                                                                                                                                                                                                                                                                                                                                                                                                                                                                                                                                      | Not relevant study design    |
| [96] Gopalan A, Abida W, Middha S, Armenia J, Sirintrapun JS, Chen YB, et al. Microsatellite unstable (MSI-H) prostate cancer (PCA): Correlation of morphology, mismatch repair immunohistochemistry (MMR-IHC) and next generation sequencing (NGS). Lab Invest 2017.                                                                                                                                                                                                                                                                                                                                                                                                                                                                                                                                                                                                                                                                                                                                                                                                                                                                                                                                                               | No DDR mutation/not relevant |
| [97] Henriquez Hernandez L, Riveros-Perez A, Valenciano A, Rodriguez-Melcon JI, Lloret M, Pinar B, et al. Quality of life of prostate cancer patients is influenced by single nucleotide polymorphisms in DNA repair genes. Radiother Oncol 2014;111:S298.                                                                                                                                                                                                                                                                                                                                                                                                                                                                                                                                                                                                                                                                                                                                                                                                                                                                                                                                                                          | No data (abstract)           |
| [98] Henriquez-Hernandez LA, Valenciano A, Foro-Arnalot P, Alvarez-Cubero MJ, Cozar JM, Suarez-Novo JF, et al. Polymorphisms in DNA-repair genes in a cohort of prostate cancer patients from different areas in Spain: heterogeneity between populations as a confounding factor in association studies. PLoS One 2013;8(7):e69735.                                                                                                                                                                                                                                                                                                                                                                                                                                                                                                                                                                                                                                                                                                                                                                                                                                                                                                | No data (abstract)           |
| [99] Henriquez-Hernandez LA, Valenciano A, Foro-Arnalot P, Alvarez-Cubero MJ, Cozar JM, Suarez-Novo JF, et al. Polymorphisms in DNA-repair genes in a cohort of prostate cancer patients from different areas in Spain: Heterogeneity between populations as a confounding factor in association studies. PLoS One 2013;8(7):no pagination.                                                                                                                                                                                                                                                                                                                                                                                                                                                                                                                                                                                                                                                                                                                                                                                                                                                                                         | Duplicate                    |
| [100] Henriquez-Hernandez LA, Valenciano A, Foro-Arnalot P, Alvarez-Cubero MJ, Cozar JM, Suarez-Novo JF, et al. Single nucleotide polymorphisms in DNA repair genes as risk factors associated to prostate cancer progression. BMC Med Genet 2014;15:143.                                                                                                                                                                                                                                                                                                                                                                                                                                                                                                                                                                                                                                                                                                                                                                                                                                                                                                                                                                           | No relevant outcome          |
| [101] Hoh I, Thorne H, Willems A, Li J, Hopper J, Fox S, et al. BRCA2 mutation confers an increased risk of aggressive prostate cancer in Australia and New Zealand. Urology 2009; conference publication:(var.pagings). 74(4                                                                                                                                                                                                                                                                                                                                                                                                                                                                                                                                                                                                                                                                                                                                                                                                                                                                                                                                                                                                       | No relevant outcome          |

|                                                                                                                                                                                                                                                                                                                                                                                                                                                                                                                                                                                                                                                                                                                                                                                                                                                                                                                                                                                                                                                                                    |                              |
|------------------------------------------------------------------------------------------------------------------------------------------------------------------------------------------------------------------------------------------------------------------------------------------------------------------------------------------------------------------------------------------------------------------------------------------------------------------------------------------------------------------------------------------------------------------------------------------------------------------------------------------------------------------------------------------------------------------------------------------------------------------------------------------------------------------------------------------------------------------------------------------------------------------------------------------------------------------------------------------------------------------------------------------------------------------------------------|------------------------------|
| SUPPL S):S6.                                                                                                                                                                                                                                                                                                                                                                                                                                                                                                                                                                                                                                                                                                                                                                                                                                                                                                                                                                                                                                                                       |                              |
| [102] Hoh IM, Thorne HJ, Willems AJ, Li J, Hopper JL, Fox SB, et al. BRCA2 antigen status confers high risk of disease progression in prostate cancer patients from high risk families in Australia and New Zealand. <i>BJU Int</i> 2010;105:1-2.                                                                                                                                                                                                                                                                                                                                                                                                                                                                                                                                                                                                                                                                                                                                                                                                                                  | No relevant outcome          |
| [103] Hoque A, Albanes D, Lippman SM, Spitz MR, Taylor PR, Klein EA, et al. Molecular epidemiologic studies within the Selenium and Vitamin E Cancer Prevention Trial (SELECT). <i>Cancer Causes Control</i> 2001;12(7):627-633.                                                                                                                                                                                                                                                                                                                                                                                                                                                                                                                                                                                                                                                                                                                                                                                                                                                   | Not primary research         |
| [104] Hospital Moinhos de Vento. Nivolumab in prostate cancer with DNA repair defects (ImmunoProst Trial). NCT03040791. In: WHO International Clinical Trials Registry Platform (ICTRP) [Internet]. Geneva: World Health Organization (WHO). 2017 [accessed 12.12.17]. Available from: <a href="https://clinicaltrials.gov/show/NCT03040791">https://clinicaltrials.gov/show/NCT03040791</a>                                                                                                                                                                                                                                                                                                                                                                                                                                                                                                                                                                                                                                                                                       | No relevant outcome          |
| [105] Hospital Moinhos de Vento, Bristol-Myers Squibb. Nivolumab in prostate cancer with DNA repair defects (ImmunoProst Trial). NCT03040791. In: ClinicalTrials.gov [Internet]. Bethesda (MD): National Library of Medicine (US). 2019 [accessed 11.12.17]. Available from: <a href="https://ClinicalTrials.gov/show/NCT03040791">https://ClinicalTrials.gov/show/NCT03040791</a>                                                                                                                                                                                                                                                                                                                                                                                                                                                                                                                                                                                                                                                                                                 | Duplicate                    |
| [106] Hu JJ, Stoyanova R, Deasy JO, Chung R, Martin E, Buyyounouski MK, et al. Genetic polymorphisms of DNA repair and inflammatory responses as determinants of late toxicity in prostate cancer patients who received radiotherapy in a randomized trial. <i>Int J Radiat Oncol Biol Phys</i> 2011;81(2 SUPPL. 1):S109-S110.                                                                                                                                                                                                                                                                                                                                                                                                                                                                                                                                                                                                                                                                                                                                                     | No relevant outcome          |
| [107] Huadong Hospital, Fudan University. DNA-repair defects and platinum-based chemotherapy in metastatic castration-resistant prostate cancer. ChiCTR-OPC-16009563. In: WHO International Clinical Trials Registry Platform (ICTRP) [Internet]. Geneva: World Health Organization (WHO). 2016 [accessed 12.12.17]. Available from: <a href="http://www.chictr.org.cn/showproj.aspx?proj=15795">http://www.chictr.org.cn/showproj.aspx?proj=15795</a>                                                                                                                                                                                                                                                                                                                                                                                                                                                                                                                                                                                                                             | No relevant outcome          |
| [108] Hummerich J, Werle-Schneider G, Popanda O, Celebi O, Chang-Claude J, Kropp S, et al. Constitutive mRNA expression of DNA repair-related genes as a biomarker for clinical radio-resistance: A pilot study in prostate cancer patients receiving radiotherapy. <i>Int J Radiat Biol</i> 2006;82(8):593-604.                                                                                                                                                                                                                                                                                                                                                                                                                                                                                                                                                                                                                                                                                                                                                                   | No DDR mutation/not relevant |
| [109] Hussain M, Carducci MA, Slovin S, Cetnar J, Qian J, McKeegan EM, et al. Targeting DNA repair with combination veliparib (ABT-888) and temozolomide in patients with metastatic castration-resistant prostate cancer. <i>Invest New Drugs</i> 2014;32(5):904-912.                                                                                                                                                                                                                                                                                                                                                                                                                                                                                                                                                                                                                                                                                                                                                                                                             | No DDR mutation/not relevant |
| [110] Hussain M, Daignault S, Twardowski P, Albany C, Stein MN, Kunju LP, et al. Co-targeting androgen receptor (AR) and DNA repair: A randomized ETS gene fusion-stratified trial of abiraterone + prednisone (Abi) +/- the PARP1 inhibitor veliparib for metastatic castration-resistant prostate cancer (MCRPC) patients (Pts) (NCI9012) A University of Chicago phase II consortium trial. In: American Society of Clinical Oncology Annual Meeting 2016; 03-Jun-2016, 2016. Available from: American Society of Clinical Oncology (ASCO) <a href="https://discovery.northernlight.com/document.php?datasource=PHE&amp;docid=PE20160617970000920&amp;context=WK%40northernlight.com">https://discovery.northernlight.com/document.php?datasource=PHE&amp;docid=PE20160617970000920&amp;context=WK%40northernlight.com</a><br><a href="http://ovidsp.ovid.com/ovidweb.cgi?T=JS&amp;CSC=Y&amp;NEWS=N&amp;PAGE=fulltext&amp;D=dscv6&amp;AN=PE2016061797000">http://ovidsp.ovid.com/ovidweb.cgi?T=JS&amp;CSC=Y&amp;NEWS=N&amp;PAGE=fulltext&amp;D=dscv6&amp;AN=PE2016061797000</a> | Duplicate                    |

|                                                                                                                                                                                                                                                                                                                                                                                                                                                                                                                                                                                                                                                                                                                                                                                                                                                                                                                                                           |                           |
|-----------------------------------------------------------------------------------------------------------------------------------------------------------------------------------------------------------------------------------------------------------------------------------------------------------------------------------------------------------------------------------------------------------------------------------------------------------------------------------------------------------------------------------------------------------------------------------------------------------------------------------------------------------------------------------------------------------------------------------------------------------------------------------------------------------------------------------------------------------------------------------------------------------------------------------------------------------|---------------------------|
| 0920                                                                                                                                                                                                                                                                                                                                                                                                                                                                                                                                                                                                                                                                                                                                                                                                                                                                                                                                                      |                           |
| [111] Hussain M, Daignault S, Twardowski P, Albany C, Stein MN, Kunju LP, et al. Co-targeting androgen receptor (AR) and DNA repair: A randomized ETS gene fusion-stratified trial of abiraterone + prednisone (Abi) +/- the PARP1 inhibitor veliparib for metastatic castration-resistant prostate cancer (mCRPC) patients (pts) (NCI9012)-A University of Chicago phase II consortium trial. <i>J Clin Oncol</i> 2016.                                                                                                                                                                                                                                                                                                                                                                                                                                                                                                                                  | Not relevant study design |
| [112] Hussain M, Daignault S, Twardowski P, Albany C, Stein MN, Kunju LP, et al. Abiraterone + prednisone (Abi) +/- veliparib (Vel) for patients (pts) with metastatic castration-resistant prostate cancer (CRPC): NCI 9012 updated clinical and genomics data. In: American Society of Clinical Oncology Annual Meeting 2017; 02-Jun-2017, 2017. Available from: American Society of Clinical Oncology (ASCO) <a href="https://discovery.northernlight.com/document.php?datasource=PHE&amp;docid=PE20170614080002130&amp;context=WK%40northernlight.com">https://discovery.northernlight.com/document.php?datasource=PHE&amp;docid=PE20170614080002130&amp;context=WK%40northernlight.com</a> <a href="http://ovidsp.ovid.com/ovidweb.cgi?T=JS&amp;CSC=Y&amp;NEWS=N&amp;PAGE=fulltext&amp;D=dscv6&amp;AN=PE20170614080002130">http://ovidsp.ovid.com/ovidweb.cgi?T=JS&amp;CSC=Y&amp;NEWS=N&amp;PAGE=fulltext&amp;D=dscv6&amp;AN=PE20170614080002130</a> | Duplicate                 |
| [113] Hussain M, Daignault S, Twardowski P, Albany C, Stein MN, Kunju LP, et al. Abiraterone + prednisone (Abi) +/- veliparib (Vel) for patients (pts) with metastatic castration-resistant prostate cancer (CRPC): NCI 9012 updated clinical and genomics data. <i>J Clin Oncol</i> 2017.                                                                                                                                                                                                                                                                                                                                                                                                                                                                                                                                                                                                                                                                | Not relevant study design |
| [114] Iddawela M, Pazarco C, Lawrence M, Furic L, Taylor R, Risbridger G. Association of "DNA damage signature" with poor outcome in early prostate cancer. <i>J Clin Oncol</i> 2015.                                                                                                                                                                                                                                                                                                                                                                                                                                                                                                                                                                                                                                                                                                                                                                     | No data (abstract)        |
| [115] Iddawela M, Boyd S, Frydenberg M, Risbridger G, Nim H. Gene expression profiling and prostate cancer: Using molecular basis of early prostate cancer to improve on gleason score. <i>Asia Pac J Clin Oncol</i> 2016.                                                                                                                                                                                                                                                                                                                                                                                                                                                                                                                                                                                                                                                                                                                                | No data (abstract)        |
| [116] Institute of Cancer Research United Kingdom, Royal Marsden N. H. S. Foundation Trust. TOPARP: A phase II trial of olaparib in patients with advanced castration resistant prostate cancer. NCT01682772. In: <i>ClinicalTrials.gov</i> [Internet]. Bethesda (MD): National Library of Medicine (US). 2016 [accessed 11.12.17]. Available from: <a href="https://ClinicalTrials.gov/show/NCT01682772">https://ClinicalTrials.gov/show/NCT01682772</a>                                                                                                                                                                                                                                                                                                                                                                                                                                                                                                 | Not relevant study design |
| [117] Institute of Cancer Research UK. The BARCODE 2 Study - The use of genetic profiling to guide prostate cancer treatment. NCT02955082. In: WHO International Clinical Trials Registry Platform (ICTRP) [Internet]. Geneva: World Health Organization (WHO). 2016 [accessed 12.12.17]. Available from: <a href="https://clinicaltrials.gov/show/NCT02955082">https://clinicaltrials.gov/show/NCT02955082</a>                                                                                                                                                                                                                                                                                                                                                                                                                                                                                                                                           | Not relevant study design |
| [118] Institute of Cancer Research UK. Analysing outcomes after prostate cancer diagnosis and treatment in carriers of rare germline mutations. NCT02705846. In: WHO International Clinical Trials Registry Platform (ICTRP) [Internet]. Geneva: World Health Organization (WHO). 2016 [accessed 12.12.17]. Available from: <a href="https://clinicaltrials.gov/show/NCT02705846">https://clinicaltrials.gov/show/NCT02705846</a>                                                                                                                                                                                                                                                                                                                                                                                                                                                                                                                         | Not relevant study design |
| [119] Janssen Research, Development L. L. C. A safety and pharmacokinetics study of niraparib plus an androgen receptor-targeted therapy in men with metastatic castration-resistant prostate cancer (BEDIVERE). NCT02924766. In:                                                                                                                                                                                                                                                                                                                                                                                                                                                                                                                                                                                                                                                                                                                         | Not relevant study design |



|                                                                                                                                                                                                                                                                                                                                                                                                                                                                                                                                                                                                                                                                                                                                                                                                                                                                                                                                                                                                                                                                                                                                                                                                |                              |
|------------------------------------------------------------------------------------------------------------------------------------------------------------------------------------------------------------------------------------------------------------------------------------------------------------------------------------------------------------------------------------------------------------------------------------------------------------------------------------------------------------------------------------------------------------------------------------------------------------------------------------------------------------------------------------------------------------------------------------------------------------------------------------------------------------------------------------------------------------------------------------------------------------------------------------------------------------------------------------------------------------------------------------------------------------------------------------------------------------------------------------------------------------------------------------------------|------------------------------|
| ClinicalTrials.gov [Internet]. Bethesda (MD): National Library of Medicine (US). 2018 [accessed 11.12.17]. Available from: <a href="https://ClinicalTrials.gov/show/NCT02924766">https://ClinicalTrials.gov/show/NCT02924766</a>                                                                                                                                                                                                                                                                                                                                                                                                                                                                                                                                                                                                                                                                                                                                                                                                                                                                                                                                                               |                              |
| [120] Janssen Research, Development L. L. C. An efficacy and safety study of niraparib in men with metastatic castration-resistant prostate cancer and DNA-repair anomalies. NCT02854436. In: ClinicalTrials.gov [Internet]. Bethesda (MD): National Library of Medicine (US). 2019 [accessed 11.12.17]. Available from: <a href="https://ClinicalTrials.gov/show/NCT02854436">https://ClinicalTrials.gov/show/NCT02854436</a>                                                                                                                                                                                                                                                                                                                                                                                                                                                                                                                                                                                                                                                                                                                                                                 | Not relevant study design    |
| [121] Kachakova D, Vlahova A, Mihova K, Mitkova A, Popov I, Popov E, et al. Targeted next generation sequencing of Bulgarian prostate cancer patients finds new somatic mutations and reflects disease heterogeneity. Eur J Cancer 2016.                                                                                                                                                                                                                                                                                                                                                                                                                                                                                                                                                                                                                                                                                                                                                                                                                                                                                                                                                       | No data (abstract)           |
| [122] Karzai F, Madan RA, Owens H, Hankin A, Couvillon A, Cordes LM, et al. Combination of PDL-1 and PARP inhibition in an unselected population with metastatic castrate-resistant prostate cancer (mCRPC). J Clin Oncol 2017.                                                                                                                                                                                                                                                                                                                                                                                                                                                                                                                                                                                                                                                                                                                                                                                                                                                                                                                                                                | Not relevant study design    |
| [123] Karzai F, Madan RA, Owens H, Hankin A, Couvillon A, Houston ND, et al. A phase II study of the anti-programmed death ligand-1 antibody durvalumab (D; MEDI4736) in combination with PARP inhibitor, olaparib (O), in metastatic castration-resistant prostate cancer (mCRPC). J Clin Oncol 2017.                                                                                                                                                                                                                                                                                                                                                                                                                                                                                                                                                                                                                                                                                                                                                                                                                                                                                         | Not relevant study design    |
| [124] Kaufman B, Shapira-Frommer R, Schmutzler RK, Audeh MW, Friedlander M, Balmana J, et al. Olaparib monotherapy in patients with advanced cancer and a germline BRCA1/2 mutation. J Clin Oncol 2015;33(3):244-50.                                                                                                                                                                                                                                                                                                                                                                                                                                                                                                                                                                                                                                                                                                                                                                                                                                                                                                                                                                           | No relevant outcome          |
| [125] Kilpinen S, Ojala K, Kallioniemi O. Analysis of kinase gene expression patterns across 5681 human tissue samples reveals functional genomic taxonomy of the kinome. PLoS One 2010;5(12):e15068.                                                                                                                                                                                                                                                                                                                                                                                                                                                                                                                                                                                                                                                                                                                                                                                                                                                                                                                                                                                          | No DDR mutation/not relevant |
| [126] Kindler HL, Locker GY, Mann H, Golan T. POLO: A randomized phase III trial of olaparib tablets in patients with metastatic pancreatic cancer (mPC) and a germline BRCA1/2mutation (gBRCAm) who have not progressed following firstline chemotherapy. J Clin Oncol 2015.                                                                                                                                                                                                                                                                                                                                                                                                                                                                                                                                                                                                                                                                                                                                                                                                                                                                                                                  | Not a relevant population    |
| [127] Kolinsky M, Mateo J, Sumanasuriya S, Rescigno P, Bianchini D, Zafeiriou Z, et al. Clinical Characteristics of Metastatic Castration-Resistant Prostate Cancer (MCRPC) Patients with DNA repair (DNAr) defects. In: American Society of Clinical Oncology Annual Meeting 2016; 03-Jun-2016, 2016. Available from: American Society of Clinical Oncology (ASCO) <a href="https://discovery.northernlight.com/document.php?datasource=PHE&amp;docid=PE20160617920000690&amp;context=WK%40northernlight.com&amp;doctype=abstract&amp;docurl=http%3A%2F%2Fmeetinglibrary.asco.org%2Fcontent%2F164344-176&amp;token=9745aabd8b2c60ef3483d75b10d738cd">https://discovery.northernlight.com/document.php?datasource=PHE&amp;docid=PE20160617920000690&amp;context=WK%40northernlight.com&amp;doctype=abstract&amp;docurl=http%3A%2F%2Fmeetinglibrary.asco.org%2Fcontent%2F164344-176&amp;token=9745aabd8b2c60ef3483d75b10d738cd</a><br><a href="http://ovidsp.ovid.com/ovidweb.cgi?T=JS&amp;CSC=Y&amp;NEWS=N&amp;PAGE=fulltext&amp;D=dscv6&amp;AN=PE20160617920000690">http://ovidsp.ovid.com/ovidweb.cgi?T=JS&amp;CSC=Y&amp;NEWS=N&amp;PAGE=fulltext&amp;D=dscv6&amp;AN=PE20160617920000690</a> | Duplicate                    |
| [128] Kolinsky M, Mateo J, Sumanasuriya S, Rescigno P, Bianchini D, Zafeiriou Z, et al. Clinical characteristics of metastatic castration-resistant prostate cancer (mCRPC) patients with DNA repair (DNAr) defects. J Clin Oncol 2016.                                                                                                                                                                                                                                                                                                                                                                                                                                                                                                                                                                                                                                                                                                                                                                                                                                                                                                                                                        | No relevant outcome          |
| [129] Koochekpour S, Majumdar S, Scioneaux R, Subramani D, Willard S, Azabdaftari G, et al. Cortisol serum levels                                                                                                                                                                                                                                                                                                                                                                                                                                                                                                                                                                                                                                                                                                                                                                                                                                                                                                                                                                                                                                                                              | No data (abstract)           |

|                                                                                                                                                                                                                                                                                                                                                                                                                                                                                                                                                                                                                                                                                                                                                                                                                                                                                   |                              |
|-----------------------------------------------------------------------------------------------------------------------------------------------------------------------------------------------------------------------------------------------------------------------------------------------------------------------------------------------------------------------------------------------------------------------------------------------------------------------------------------------------------------------------------------------------------------------------------------------------------------------------------------------------------------------------------------------------------------------------------------------------------------------------------------------------------------------------------------------------------------------------------|------------------------------|
| are increased and induce genomic instability in advanced prostate cancer. <i>J Urol</i> 2012;187(4 SUPPL. 1):e326.                                                                                                                                                                                                                                                                                                                                                                                                                                                                                                                                                                                                                                                                                                                                                                |                              |
| [130] Kote-Jarai Z, Leongamornlert DA, Saunders EJ, Wakerell S, Whitmore I, Dadaev T, et al. Rare DNA repair gene mutations predispose to young onset and lethal prostate cancer in the UK. In: American Society of Human Genetics Annual Meeting 2017; 17-Oct-2017, 2017. Available from: American Society of Human Genetics (ASHG) <a href="https://discovery.northernlight.com/document.php?datasource=PHE&amp;docid=PE20170927030003390&amp;context=WK%40northernlight.com">https://discovery.northernlight.com/document.php?datasource=PHE&amp;docid=PE20170927030003390&amp;context=WK%40northernlight.com</a><br><a href="http://ovidsp.ovid.com/ovidweb.cgi?T=JS&amp;CSC=Y&amp;NEWS=N&amp;PAGE=fulltext&amp;D=dscv6&amp;AN=PE20170927030003390">http://ovidsp.ovid.com/ovidweb.cgi?T=JS&amp;CSC=Y&amp;NEWS=N&amp;PAGE=fulltext&amp;D=dscv6&amp;AN=PE20170927030003390</a> | No relevant outcome          |
| [131] Krieger L, Byard I, Clay T, Ganju V, Ryan CJ, Watkins S, et al. Trial of rucaparib in prostate indications 3 (triton3): an international, multicentre, randomised, open-label phase 3 study of rucaparib vs physician's choice of therapy for patients with metastatic castration-resistant prostate cancer (MCRPC) associated with homologous recombination deficiency (HRD). <i>Asia-pacific journal of clinical oncology</i> . Conference: annual scientific meeting of the australian and new zealand urogenital and prostate, ANZUP 2017. Australia 2017;13:50.                                                                                                                                                                                                                                                                                                        | No relevant outcome          |
| [132] Krieger L, Shapiro J, Byard I, Campbell D, Clay T, Ganju V, et al. The triton clinical trial programme: Evaluation of the parp inhibitor rucaparib in patients with metastatic castration-resistant prostate cancer (mCRPC) associated with homologous recombination deficiency (HRD). <i>Asia Pac J Clin Oncol</i> 2017.                                                                                                                                                                                                                                                                                                                                                                                                                                                                                                                                                   | No relevant outcome          |
| [133] Kumar A, Coleman I, Morrissey C, Zhang X, True LD, Gulati R, et al. Substantial interindividual and limited intraindividual genomic diversity among tumors from men with metastatic prostate cancer. <i>Nat Med</i> 2016;22(4):369-378.                                                                                                                                                                                                                                                                                                                                                                                                                                                                                                                                                                                                                                     | No DDR mutation/not relevant |
| [134] Lalonde E, Ishkanian AS, Sykes J, Fraser M, Ross-Adams H, Erho N, et al. Tumour genomic and microenvironmental heterogeneity for integrated prediction of 5-year biochemical recurrence of prostate cancer: a retrospective cohort study. <i>Lancet Oncol</i> 2014;15(13):1521-1532.                                                                                                                                                                                                                                                                                                                                                                                                                                                                                                                                                                                        | No DDR mutation/not relevant |
| [135] Ledet EM, Ernst EM, Schiff J, Lin S, Lewis BE, Sartor AO. Germline variants and family history in Caucasian and African-American prostate cancer. In: American Society of Clinical Oncology Annual Meeting 2017; 02-Jun-2017, 2017. Available from: American Society of Clinical Oncology (ASCO) <a href="https://discovery.northernlight.com/document.php?datasource=PHE&amp;docid=PE20170614020002280&amp;context=WK%40northernlight.com">https://discovery.northernlight.com/document.php?datasource=PHE&amp;docid=PE20170614020002280&amp;context=WK%40northernlight.com</a><br><a href="http://ovidsp.ovid.com/ovidweb.cgi?T=JS&amp;CSC=Y&amp;NEWS=N&amp;PAGE=fulltext&amp;D=dscv6&amp;AN=PE20170614020002280">http://ovidsp.ovid.com/ovidweb.cgi?T=JS&amp;CSC=Y&amp;NEWS=N&amp;PAGE=fulltext&amp;D=dscv6&amp;AN=PE20170614020002280</a>                               | Duplicate                    |
| [136] Lee BH. Commentary on: "Inherited DNA-repair gene mutations in men with metastatic prostate cancer." Pritchard CC, Mateo J, Walsh MF, De Sarkar N, Abida W, Beltran H, Garofalo A, Gulati R, Carreira S, Eeles R, Elemento O, Rubin MA, Robinson D, Lonigro R, Hussain M, Chinnaiyan A, Vinson J, Filipenko J, Garraway L, Taplin ME, AlDubayan S, Han GC, Beightol M, Morrissey C, Nghiem B, Cheng HH, Montgomery B, Walsh T,                                                                                                                                                                                                                                                                                                                                                                                                                                              | Not primary research         |

|                                                                                                                                                                                                                                                                                                                                                                                                                                                                                                                                                                                                                                                                                                                                                                                                                                                                                                                                                                                                                                                                                                                                                       |                           |
|-------------------------------------------------------------------------------------------------------------------------------------------------------------------------------------------------------------------------------------------------------------------------------------------------------------------------------------------------------------------------------------------------------------------------------------------------------------------------------------------------------------------------------------------------------------------------------------------------------------------------------------------------------------------------------------------------------------------------------------------------------------------------------------------------------------------------------------------------------------------------------------------------------------------------------------------------------------------------------------------------------------------------------------------------------------------------------------------------------------------------------------------------------|---------------------------|
| Casadei S, Berger M, Zhang L, Zehir A, Vijai J, Scher HI, Sawyers C, Schultz N, Kantoff PW, Solit D, Robson M, Van Allen EM, Offit K, de Bono J, Nelson PS. N Engl J Med. 2016 Aug 4;375(5):443-53. Urol Oncol 2017;35(9):575-576.                                                                                                                                                                                                                                                                                                                                                                                                                                                                                                                                                                                                                                                                                                                                                                                                                                                                                                                    |                           |
| [137] Lee Kindler H, Locker GY, Mann H, Golan T. POLO: A randomized phase III trial of olaparib tablets in patients with metastatic pancreatic cancer (mPC) and a germline BRCA1/2mutation (gBRCAm) who have not progressed following first-line chemotherapy. J Clin Oncol 2015.                                                                                                                                                                                                                                                                                                                                                                                                                                                                                                                                                                                                                                                                                                                                                                                                                                                                     | Not a relevant population |
| [138] Lin S, Ledet EM, Schiff J, Ernst EM, Garvey CE, Lewis BE, et al. inherited pathologic mutations and family history in patients with prostate cancer. In: American Society of Clinical Oncology Genitourinary Cancers Symposium 2017; 16-Feb-2017, 2017. Available from: American Society of Clinical Oncology (ASCO) <a href="https://discovery.northernlight.com/document.php?datasource=PHE&amp;docid=PE20170222000004710&amp;context=WK%40northernlight.com&amp;doctype=abstract&amp;docurl=http%3A%2F%2Fmeetinglibrary.asco.org%2Fcontent%2F179628-197&amp;token=055decf4a8362b1587c530bde8b5664f">https://discovery.northernlight.com/document.php?datasource=PHE&amp;docid=PE20170222000004710&amp;context=WK%40northernlight.com&amp;doctype=abstract&amp;docurl=http%3A%2F%2Fmeetinglibrary.asco.org%2Fcontent%2F179628-197&amp;token=055decf4a8362b1587c530bde8b5664f</a><br><a href="http://ovidsp.ovid.com/ovidweb.cgi?T=JS&amp;CSC=Y&amp;NEWS=N&amp;PAGE=fulltext&amp;D=dscv6&amp;AN=PE20170222000004710">http://ovidsp.ovid.com/ovidweb.cgi?T=JS&amp;CSC=Y&amp;NEWS=N&amp;PAGE=fulltext&amp;D=dscv6&amp;AN=PE20170222000004710</a> | Duplicate                 |
| [139] Lorentz J, Ghanem G, Liu S, Vesprini D. Sunnybrook Familial Prostate Cancer Clinic and Male Oncology and Research Program. In: International Symposium on Hereditary Breast and Ovarian Cancer 2016; 10-May-2016, 2016. Available from: Hereditary Breast and Ovarian Cancer Foundation (HBOCF) <a href="https://discovery.northernlight.com/document.php?datasource=PHE&amp;docid=PE20160711120004110&amp;context=WK%40northernlight.com">https://discovery.northernlight.com/document.php?datasource=PHE&amp;docid=PE20160711120004110&amp;context=WK%40northernlight.com</a><br><a href="http://ovidsp.ovid.com/ovidweb.cgi?T=JS&amp;CSC=Y&amp;NEWS=N&amp;PAGE=fulltext&amp;D=dscv6&amp;AN=PE20160711120004110">http://ovidsp.ovid.com/ovidweb.cgi?T=JS&amp;CSC=Y&amp;NEWS=N&amp;PAGE=fulltext&amp;D=dscv6&amp;AN=PE20160711120004110</a>                                                                                                                                                                                                                                                                                                    | Not a relevant population |
| [140] M. D. Anderson Cancer Center, AstraZeneca, Merck Sharp, Dohme Corp. Study of olaparib maintenance following cabazitaxel-carbo in men with AVPC. NCT03263650. In: ClinicalTrials.gov [Internet]. Bethesda (MD): National Library of Medicine (US). 2020 [accessed 11.12.17]. Available from: <a href="https://ClinicalTrials.gov/show/NCT03263650">https://ClinicalTrials.gov/show/NCT03263650</a>                                                                                                                                                                                                                                                                                                                                                                                                                                                                                                                                                                                                                                                                                                                                               | Not relevant study design |
| [141] M.D. Anderson Cancer Center. Study of olaparib maintenance following cabazitaxel-carbo in men with AVPC. NCT03263650. In: WHO International Clinical Trials Registry Platform (ICTRP) [Internet]. Geneva: World Health Organization (WHO). 2017 [accessed 12.12.17]. Available from: <a href="https://clinicaltrials.gov/show/NCT03263650">https://clinicaltrials.gov/show/NCT03263650</a>                                                                                                                                                                                                                                                                                                                                                                                                                                                                                                                                                                                                                                                                                                                                                      | Duplicate                 |
| [142] Maia S, Cardoso M, Paulo P, Pinheiro M, Pinto P, Santos C, et al. The role of germline mutations in the BRCA1/2 and mismatch repair genes in men ascertained for early-onset and/or familial prostate cancer. Fam Cancer 2016;15(1):111-121.                                                                                                                                                                                                                                                                                                                                                                                                                                                                                                                                                                                                                                                                                                                                                                                                                                                                                                    | Not a relevant population |
| [143] Manguoglu E, Guran S, Yamac D, Colak T, Simsek M, Baykara M, et al. Germline mutations of BRCA1 and BRCA2 genes in Turkish breast, ovarian, and prostate cancer patients. Cancer Genet Cytogenet 2010;203(2):230-237.                                                                                                                                                                                                                                                                                                                                                                                                                                                                                                                                                                                                                                                                                                                                                                                                                                                                                                                           | Duplicate                 |

|                                                                                                                                                                                                                                                                                                                                                                                                                                                                                                                                                                                                                                                |                              |
|------------------------------------------------------------------------------------------------------------------------------------------------------------------------------------------------------------------------------------------------------------------------------------------------------------------------------------------------------------------------------------------------------------------------------------------------------------------------------------------------------------------------------------------------------------------------------------------------------------------------------------------------|------------------------------|
| [144] Mateo J, Sandhu S, Miranda S, Carreira S, Jain S, Ralph C, et al. DNA repair defects and antitumor activity with PARP inhibition: TOPARP, a phase II trial of olaparib in metastatic castration resistant prostate cancer. <i>Cancer Res</i> 2015.                                                                                                                                                                                                                                                                                                                                                                                       | Not relevant study design    |
| [145] Mateo J, Carreira S, Sandhu S, Miranda S, Mossop H, Perez-Lopez R, et al. DNA-repair defects and olaparib in metastatic prostate cancer. <i>N Engl J Med</i> 2015;373(18):1697-1708.                                                                                                                                                                                                                                                                                                                                                                                                                                                     | Not relevant study design    |
| [146] Mateo J, Carreira S, Mossop H, Rescigno P, Kolinsky M, Castro E, et al. DNA repair genes aberrations in germline DNA in metastatic castration-resistant prostate cancer patients. <i>Cancer Res</i> 2016.                                                                                                                                                                                                                                                                                                                                                                                                                                | Not relevant study design    |
| [147] McCoy P, Macintyre G, Clarkson M, Kurganovs N, Lunke S, Ryan A, et al. MSH2 translocations are associated with clinically aggressive prostate cancer. <i>BJU Int</i> 2015.                                                                                                                                                                                                                                                                                                                                                                                                                                                               | No DDR mutation/not relevant |
| [148] McCoy P, Macintyre G, Clarkson M, Kurganovs N, Ryan A, Lunke S, et al. Hormonally regulated mechanisms of MSH2 disruption in prostate cancer. <i>BJU Int</i> 2016.                                                                                                                                                                                                                                                                                                                                                                                                                                                                       | No DDR mutation/not relevant |
| [149] McCoy P, Macintyre G, Clarkson M, Kurganovs N, Ryan A, Lunke S, et al. The potential for androgen influenced disruption of the mismatch repair gene MSH2 in prostate cancer. <i>BJU Int</i> 2017.                                                                                                                                                                                                                                                                                                                                                                                                                                        | No DDR mutation/not relevant |
| [150] Medivation I. An international study to evaluate the effectiveness of talazoparib in men with a genomic defect and metastatic castration-resistant prostate cancer who received previous chemotherapy and progressed on hormonal treatment. EUCTR2016-002036-32-DE. In: WHO International Clinical Trials Registry Platform (ICTRP) [Internet]. Geneva: World Health Organization (WHO). 2016 [accessed 12.12.17]. Available from: <a href="https://www.clinicaltrialsregister.eu/ctr-search/search?query=eudract_number:2016-002036-32">https://www.clinicaltrialsregister.eu/ctr-search/search?query=eudract_number:2016-002036-32</a> | No relevant outcome          |
| [151] Michalarea V, Lopez J, Lorente D, Carreira S, Hassam H, Parmar M, et al. Translational phase I trial combining the AKT inhibitor AZD5363 (AZD) and PARP inhibitor olaparib (Ola) in advanced cancer patients (pts). <i>Eur J Cancer</i> 2015;51:S68.                                                                                                                                                                                                                                                                                                                                                                                     | No data (abstract)           |
| [152] Michalarea V, Roda D, Drew Y, Carreira S, O'Carrigan BS, Shaw H, et al. Phase I trial combining the PARP inhibitor olaparib (Ola) and AKT inhibitor AZD5363 (AZD) in germline (g)BRCA and non-BRCA mutant (m) advanced cancer patients (pts) incorporating noninvasive monitoring of cancer mutations. <i>Cancer Res</i> 2016.                                                                                                                                                                                                                                                                                                           | No data (abstract)           |
| [153] Michie CO, Sandhu SK, Schelman WR, Molife LR, Wilding G, Omlin AG, et al. Final results of the phase I trial of niraparib (MK4827), a poly(ADP)ribose polymerase (PARP) inhibitor incorporating proof of concept biomarker studies and expansion cohorts involving BRCA1/2 mutation carriers, sporadic ovarian, and castration resistant prostate cancer (CRPC). <i>J Clin Oncol</i> 2013.                                                                                                                                                                                                                                               | No relevant outcome          |
| [154] Miguel Mosquera J, Beltran H, Sboner A, Kossai M, Fontugne J, Pauli C, et al. Precision cancer medicine program for whole exome sequencing (WES) of metastatic tumors reveals biomarkers of response. <i>Lab Invest</i> 2015;95:461A.                                                                                                                                                                                                                                                                                                                                                                                                    | No data (abstract)           |
| [155] Myers CE, Feldman R, Abbott BL, Reddy SK, Castro M. Frequency of BRCA mutations and co-occurring alterations in prostate cancer. In: American Society of Clinical Oncology Genitourinary Cancers Symposium 2016; 07-                                                                                                                                                                                                                                                                                                                                                                                                                     | Duplicate                    |

|                                                                                                                                                                                                                                                                                                                                                                                                                                                                                                                                                                                                                                                                                                                                                                                                                                                                                                            |                      |
|------------------------------------------------------------------------------------------------------------------------------------------------------------------------------------------------------------------------------------------------------------------------------------------------------------------------------------------------------------------------------------------------------------------------------------------------------------------------------------------------------------------------------------------------------------------------------------------------------------------------------------------------------------------------------------------------------------------------------------------------------------------------------------------------------------------------------------------------------------------------------------------------------------|----------------------|
| Jan-2016, 2016. Available from: American Society of Clinical Oncology (ASCO)<br><a href="https://discovery.northernlight.com/document.php?datasource=PHE&amp;docid=PE20160202050001540&amp;context=WK%40northernlight.com&amp;doctype=abstract&amp;docurl=http%3A%2F%2Fmeetinglibrary.asco.org%2Fcontent%2F158437-172&amp;token=19612d8a13595355cc1d6e208f2d454b">https://discovery.northernlight.com/document.php?datasource=PHE&amp;docid=PE20160202050001540&amp;context=WK%40northernlight.com&amp;doctype=abstract&amp;docurl=http%3A%2F%2Fmeetinglibrary.asco.org%2Fcontent%2F158437-172&amp;token=19612d8a13595355cc1d6e208f2d454b</a><br><a href="http://ovidsp.ovid.com/ovidweb.cgi?T=JS&amp;CSC=Y&amp;NEWS=N&amp;PAGE=fulltext&amp;D=dscv6&amp;AN=PE20160202050001540">http://ovidsp.ovid.com/ovidweb.cgi?T=JS&amp;CSC=Y&amp;NEWS=N&amp;PAGE=fulltext&amp;D=dscv6&amp;AN=PE20160202050001540</a> |                      |
| [156] Mygatt JG, Osborn DJ. DNA-Repair Gene Mutations in Metastatic Prostate Cancer. <i>N Engl J Med</i> 2016;375(18):1802-1805.                                                                                                                                                                                                                                                                                                                                                                                                                                                                                                                                                                                                                                                                                                                                                                           | Not primary research |
| [157] Na R, Zheng SL, Han M, Yu H, Jiang D, Shah S, et al. Germline Mutations In ATM And BRCA1/2 Distinguish Risk For Lethal And Indolent Prostate Cancer And Are Associated With Early Age At Death. In: European Association of Urology Annual Congress 2017; 24-Mar-2017, 2017. Available from: European Association of Urology (EAU)<br><a href="https://discovery.northernlight.com/document.php?datasource=PHE&amp;docid=PE20170425020002260&amp;context=WK%40northernlight.com">https://discovery.northernlight.com/document.php?datasource=PHE&amp;docid=PE20170425020002260&amp;context=WK%40northernlight.com</a><br><a href="http://ovidsp.ovid.com/ovidweb.cgi?T=JS&amp;CSC=Y&amp;NEWS=N&amp;PAGE=fulltext&amp;D=dscv6&amp;AN=PE20170425020002260">http://ovidsp.ovid.com/ovidweb.cgi?T=JS&amp;CSC=Y&amp;NEWS=N&amp;PAGE=fulltext&amp;D=dscv6&amp;AN=PE20170425020002260</a>                   | Duplicate            |
| [158] Nappi L, Gleave ME. PARP inhibition in castration-resistant prostate cancer. <i>Future Oncol</i> 2016;12(5):577-580.                                                                                                                                                                                                                                                                                                                                                                                                                                                                                                                                                                                                                                                                                                                                                                                 | Not primary research |
| [159] National Cancer Institute (NCI). Veliparib in treating patients with malignant solid tumors that do not respond to previous therapy. NCT00892736. In: WHO International Clinical Trials Registry Platform (ICTRP) [Internet]. Geneva: World Health Organization (WHO). 2009 [accessed 12.12.17]. Available from:<br><a href="https://clinicaltrials.gov/show/NCT00892736">https://clinicaltrials.gov/show/NCT00892736</a>                                                                                                                                                                                                                                                                                                                                                                                                                                                                            | No relevant outcome  |
| [160] National Cancer Institute (NCI). A phase II single arm pilot study of the Chk1/2 inhibitor (LY2606368) in BRCA1/2 mutation associated breast or ovarian cancer, triple negative breast cancer, high grade serous ovarian cancer, and metastatic castrate-resistant prostate cancer. NCT02203513. In: WHO International Clinical Trials Registry Platform (ICTRP) [Internet]. Geneva: World Health Organization (WHO). 2014 [accessed 12.12.17]. Available from:<br><a href="https://clinicaltrials.gov/show/NCT02203513">https://clinicaltrials.gov/show/NCT02203513</a>                                                                                                                                                                                                                                                                                                                             | No relevant outcome  |
| [161] National Cancer Institute. Olaparib with or without cediranib in treating patients with metastatic castration-resistant prostate cancer. NCT02893917. In: ClinicalTrials.gov [Internet]. Bethesda (MD): National Library of Medicine (US). 2018 [accessed 11.12.17]. Available from: <a href="https://ClinicalTrials.gov/show/NCT02893917">https://ClinicalTrials.gov/show/NCT02893917</a>                                                                                                                                                                                                                                                                                                                                                                                                                                                                                                           | No relevant outcome  |
| [162] National Cancer Institute. Olaparib and radium Ra 223 dichloride in treating men with metastatic castration-resistant prostate cancer that has spread to the bone. NCT03317392. In: ClinicalTrials.gov [Internet]. Bethesda (MD): National Library of Medicine (US). 2020 [accessed 11.12.17]. Available from:<br><a href="https://ClinicalTrials.gov/show/NCT03317392">https://ClinicalTrials.gov/show/NCT03317392</a>                                                                                                                                                                                                                                                                                                                                                                                                                                                                              | No relevant outcome  |

|                                                                                                                                                                                                                                                                                                                                                                                                                                                                                                                                                                                                                                                                                                                                                                                                                                                                              |                           |
|------------------------------------------------------------------------------------------------------------------------------------------------------------------------------------------------------------------------------------------------------------------------------------------------------------------------------------------------------------------------------------------------------------------------------------------------------------------------------------------------------------------------------------------------------------------------------------------------------------------------------------------------------------------------------------------------------------------------------------------------------------------------------------------------------------------------------------------------------------------------------|---------------------------|
| [163] National Cancer Institute, National Institutes of Health Clinical Center. Pilot trial of BMN 673, an oral PARP inhibitor, in patients with advanced solid tumors and deleterious BRCA mutations. NCT01989546. In: ClinicalTrials.gov [Internet]. Bethesda (MD): National Library of Medicine (US). 2018 [accessed 11.12.17]. Available from: <a href="https://ClinicalTrials.gov/show/NCT01989546">https://ClinicalTrials.gov/show/NCT01989546</a>                                                                                                                                                                                                                                                                                                                                                                                                                     | No relevant outcome       |
| [164] National Taiwan University Hospital. Application of genetic polymorphisms of DNA repair in the prediction of prostate cancer susceptibility and its clinical outcome. NCT00167024. In: WHO International Clinical Trials Registry Platform (ICTRP) [Internet]. Geneva: World Health Organization (WHO). 2005 [accessed 12.12.17]. Available from: <a href="http://clinicaltrials.gov/show/NCT00167024">http://clinicaltrials.gov/show/NCT00167024</a>                                                                                                                                                                                                                                                                                                                                                                                                                  | Ongoing trial (no data)   |
| [165] Nelson P, Mateo J, Beltran H, Sarkar ND, Elemento O, Rubin MA, et al. Inherited mutations in DNA repair genes in men with metastatic castration-resistant prostate cancer. In: American Society of Clinical Oncology Annual Meeting 2016; 03-Jun-2016, 2016. Available from: American Society of Clinical Oncology (ASCO) <a href="https://discovery.northernlight.com/document.php?datasource=PHE&amp;docid=PE20160617980000810&amp;context=WK%40northernlight.com">https://discovery.northernlight.com/document.php?datasource=PHE&amp;docid=PE20160617980000810&amp;context=WK%40northernlight.com</a><br><a href="http://ovidsp.ovid.com/ovidweb.cgi?T=JS&amp;CSC=Y&amp;NEWS=N&amp;PAGE=fulltext&amp;D=dscv6&amp;AN=PE20160617980000810">http://ovidsp.ovid.com/ovidweb.cgi?T=JS&amp;CSC=Y&amp;NEWS=N&amp;PAGE=fulltext&amp;D=dscv6&amp;AN=PE20160617980000810</a> | Duplicate                 |
| [166] Nguyen PL, Yang M, Werner L, Regan M, D'Amico AV, Pomerantz MM, et al. The impact of genetic variants in the double-stranded DNA break repair pathway on cancer control in men treated with radiation for prostate cancer. <i>Int J Radiat Oncol Biol Phys</i> 2011;81(2 SUPPL. 1):S380.                                                                                                                                                                                                                                                                                                                                                                                                                                                                                                                                                                               | No relevant outcome       |
| [167] Nickerson ML, Im KM, Misner KJ, Tan W, Lou H, Gold B, et al. Somatic alterations contributing to metastasis of a castration-resistant prostate cancer. <i>Hum Mutat</i> 2013;34(9):1231-1241.                                                                                                                                                                                                                                                                                                                                                                                                                                                                                                                                                                                                                                                                          | Not relevant study design |
| [168] Nicolas E, Zhou Y, Serebriiskii IG, Andrade MD, Handorf EA, Dunbrack RL, et al. Information-driven approaches to predicting familial risk for prostate cancer. <i>Cancer Res</i> 2015.                                                                                                                                                                                                                                                                                                                                                                                                                                                                                                                                                                                                                                                                                 | No data (abstract)        |
| [169] Nientiedt C, Tolstov Y, Volckmar AL, Endris V, Bonekamp D, Haberkorn U, et al. PARP inhibition in BRCA2-mutated prostate cancer. <i>Ann Oncol</i> 2017;28(1):189-191.                                                                                                                                                                                                                                                                                                                                                                                                                                                                                                                                                                                                                                                                                                  | Not relevant study design |
| [170] Northwestern University. Abiraterone/prednisone, olaparib, or abiraterone/prednisone + olaparib in patients with metastatic castration-resistant prostate cancer with DNA repair defects. NCT03012321. In: WHO International Clinical Trials Registry Platform (ICTRP) [Internet]. Geneva: World Health Organization (WHO). 2017 [accessed 12.12.17]. Available from: <a href="https://clinicaltrials.gov/show/NCT03012321">https://clinicaltrials.gov/show/NCT03012321</a>                                                                                                                                                                                                                                                                                                                                                                                            | No relevant outcome       |
| [171] Northwestern University, AstraZeneca, National Cancer Institute. Abiraterone/prednisone, olaparib, or abiraterone/prednisone + olaparib in patients with metastatic castration-resistant prostate cancer with DNA repair defects. NCT03012321. In: ClinicalTrials.gov [Internet]. Bethesda (MD): National Library of Medicine (US). 2021 [accessed 11.12.17]. Available from: <a href="https://ClinicalTrials.gov/show/NCT03012321">https://ClinicalTrials.gov/show/NCT03012321</a>                                                                                                                                                                                                                                                                                                                                                                                    | Duplicate                 |
| [172] Nowacka-Zawisza M, Forma E, Walczak M, Rozanski W, Brys M, Krajewska WM. Loss of heterozygosity for                                                                                                                                                                                                                                                                                                                                                                                                                                                                                                                                                                                                                                                                                                                                                                    | No DDR mutation/not       |

|                                                                                                                                                                                                                                                                                                                                                                                                                                                                                                                                                                                                                                                                                                                                                                                                                                                                                  |                              |
|----------------------------------------------------------------------------------------------------------------------------------------------------------------------------------------------------------------------------------------------------------------------------------------------------------------------------------------------------------------------------------------------------------------------------------------------------------------------------------------------------------------------------------------------------------------------------------------------------------------------------------------------------------------------------------------------------------------------------------------------------------------------------------------------------------------------------------------------------------------------------------|------------------------------|
| chromosomal regions 15q14-21.1, 17q21.31, and 13q12.3-13.1 and its relevance for prostate cancer. <i>Med Oncol</i> 2015;32(11):246.                                                                                                                                                                                                                                                                                                                                                                                                                                                                                                                                                                                                                                                                                                                                              | relevant                     |
| [173] Nowacka-Zawisza M, Wisnik E, Wasilewski A, Skowronska M, Forma E, Brys M, et al. Polymorphisms of homologous recombination RAD51, RAD51B, XRCC2, and XRCC3 genes and the risk of prostate cancer. <i>Anal Cell Pathol</i> 2015;2015:828646.                                                                                                                                                                                                                                                                                                                                                                                                                                                                                                                                                                                                                                | No DDR mutation/not relevant |
| [174] Olmos D, Castro E. BRCA mutations in prostate cancer patients. <i>Clin Adv Hematol Oncol</i> 2013;11(9):598-9.                                                                                                                                                                                                                                                                                                                                                                                                                                                                                                                                                                                                                                                                                                                                                             | Not primary research         |
| [175] Pahuja S, Appleman LJ, Belani CP, Chen A, Chu E, Beumer JH, et al. Preliminary activity of veliparib (V) in BRCA2-mutated metastatic castration-resistant prostate cancer (mCRPC). <i>J Clin Oncol</i> 2015.                                                                                                                                                                                                                                                                                                                                                                                                                                                                                                                                                                                                                                                               | Not a relevant population    |
| [176] Palapattu G, Cani AK, Hoevelson D, Mehra R, Montgomery JS, Morgan T, et al. Molecular profiling of prostate cancer derived from serial MRI targeted prostate biopsy in men on active surveillance. <i>Eur Urol, Supplements</i> 2016;15(3):e832.                                                                                                                                                                                                                                                                                                                                                                                                                                                                                                                                                                                                                           | No relevant outcome          |
| [177] Patel VL, Busch E, D'Amico AV, Rebbeck TR. BRCA2 Mutations in prostate cancer assort into cluster regions. In: American Society for Radiation Oncology Annual Meeting 2016; 25-Sep-2016, 2016. Available from: American Society for Radiation Oncology (ASTRO)<br><a href="https://discovery.northernlight.com/document.php?datasource=PHE&amp;docid=PE20161006180001490&amp;context=WK%40northernlight.com">https://discovery.northernlight.com/document.php?datasource=PHE&amp;docid=PE20161006180001490&amp;context=WK%40northernlight.com</a><br><a href="http://ovidsp.ovid.com/ovidweb.cgi?T=JS&amp;CSC=Y&amp;NEWS=N&amp;PAGE=fulltext&amp;D=dscv6&amp;AN=PE20161006180001490">http://ovidsp.ovid.com/ovidweb.cgi?T=JS&amp;CSC=Y&amp;NEWS=N&amp;PAGE=fulltext&amp;D=dscv6&amp;AN=PE20161006180001490</a>                                                             | Duplicate                    |
| [178] Patel VL, Busch E, Cronin AM, Pomerantz M, Freedman M, D'Amico AV, et al. Germline BRCA2 mutations in men with prostate cancer assort into functional cluster regions. In: American Society for Radiation Oncology Annual Meeting 2017; 24-Sep-2017, 2017. Available from: American Society for Radiation Oncology (ASTRO)<br><a href="https://discovery.northernlight.com/document.php?datasource=PHE&amp;docid=PE20171009030000110&amp;context=WK%40northernlight.com">https://discovery.northernlight.com/document.php?datasource=PHE&amp;docid=PE20171009030000110&amp;context=WK%40northernlight.com</a><br><a href="http://ovidsp.ovid.com/ovidweb.cgi?T=JS&amp;CSC=Y&amp;NEWS=N&amp;PAGE=fulltext&amp;D=dscv6&amp;AN=PE20171009030000110">http://ovidsp.ovid.com/ovidweb.cgi?T=JS&amp;CSC=Y&amp;NEWS=N&amp;PAGE=fulltext&amp;D=dscv6&amp;AN=PE20171009030000110</a> | Duplicate                    |
| [179] Patel VL, Busch E, Cronin AM, Pomerantz M, Freedman M, D'Amico AV, et al. Germline BRCA2 mutations in men with prostate cancer assort into functional cluster regions. <i>Int J Radiat Oncol Biol Phys</i> 2017.                                                                                                                                                                                                                                                                                                                                                                                                                                                                                                                                                                                                                                                           | No relevant outcome          |
| [180] Petrovics G, Ravindranath L, Chen Y, Ying K, Ali A, Young D, et al. Higher frequency of germline BRCA1 and BRCA2 mutations in African American prostate cancer. In: American Urological Association Annual Meeting 2016; 06-May-2016, 2016. Available from: American Urological Association (AUA)<br><a href="https://discovery.northernlight.com/document.php?datasource=PHE&amp;docid=PE20160505790000290&amp;context=WK%40northernlight.com">https://discovery.northernlight.com/document.php?datasource=PHE&amp;docid=PE20160505790000290&amp;context=WK%40northernlight.com</a><br><a href="http://ovidsp.ovid.com/ovidweb.cgi?T=JS&amp;CSC=Y&amp;NEWS=N&amp;PAGE=fulltext&amp;D=dscv6&amp;AN=PE2016050579000">http://ovidsp.ovid.com/ovidweb.cgi?T=JS&amp;CSC=Y&amp;NEWS=N&amp;PAGE=fulltext&amp;D=dscv6&amp;AN=PE2016050579000</a>                                  | Duplicate                    |

|                                                                                                                                                                                                                                                                                                                                                                                                                                                                                                                                                                                                                                                                                                                                                                                                                                                                     |                           |
|---------------------------------------------------------------------------------------------------------------------------------------------------------------------------------------------------------------------------------------------------------------------------------------------------------------------------------------------------------------------------------------------------------------------------------------------------------------------------------------------------------------------------------------------------------------------------------------------------------------------------------------------------------------------------------------------------------------------------------------------------------------------------------------------------------------------------------------------------------------------|---------------------------|
| 0290                                                                                                                                                                                                                                                                                                                                                                                                                                                                                                                                                                                                                                                                                                                                                                                                                                                                |                           |
| [181] Pfizer, Medivation Inc. A study of talazoparib in men with DNA repair defects and metastatic castration-resistant prostate cancer. NCT03148795. In: ClinicalTrials.gov [Internet]. Bethesda (MD): National Library of Medicine (US). 2019 [accessed 11.12.17]. Available from: <a href="https://ClinicalTrials.gov/show/NCT03148795">https://ClinicalTrials.gov/show/NCT03148795</a>                                                                                                                                                                                                                                                                                                                                                                                                                                                                          | No relevant outcome       |
| [182] Pilie P, Johnson AM, Zuhlke KA, Okoth LA, Tomlins S, Cooney KA. Identification of germline mutations in men with early onset prostate cancer. <i>J Clin Oncol</i> 2015.                                                                                                                                                                                                                                                                                                                                                                                                                                                                                                                                                                                                                                                                                       | No data (abstract)        |
| [183] Pilie PG, Johnson AM, Hanson KL, Dayno ME, Kapron AL, Stoffel EM, et al. Germline genetic variants in men with prostate cancer and one or more additional cancers. <i>Cancer</i> 2017;123(20):3925-3932.                                                                                                                                                                                                                                                                                                                                                                                                                                                                                                                                                                                                                                                      | Not a relevant population |
| [184] Pishvaian MJ, Wang H, Zhuang T, He AR, Hwang JJ, Hankin A, et al. A phase I/II study of ABT-888 in combination with 5-fluorouracil (5-FU) and oxaliplatin (Ox) in patients with metastatic pancreatic cancer (MPC). <i>J Clin Oncol</i> 2013.                                                                                                                                                                                                                                                                                                                                                                                                                                                                                                                                                                                                                 | Not a relevant population |
| [185] Pritchard CC, Offit K, Nelson PS. DNA-repair gene mutations in metastatic prostate cancer. <i>N Engl J Med</i> . 2016:1804.                                                                                                                                                                                                                                                                                                                                                                                                                                                                                                                                                                                                                                                                                                                                   | Not primary research      |
| [186] Pugh TJ, Keyes M, Barclay L, Delaney A, Krzywinski M, Thomas D, et al. Sequence variant discovery in DNA repair genes from radiosensitive and radiotolerant prostate brachytherapy patients. <i>Clin Cancer Res</i> 2009;15(15):5008-16.                                                                                                                                                                                                                                                                                                                                                                                                                                                                                                                                                                                                                      | No relevant outcome       |
| [187] Quigley D, Alumkal JJ, Wyatt AW, Kothari V, Foye A, Lloyd P, et al. Analysis of circulating cell-free DNA IDENTIFIES MULTICLONAL HETEROGENEITY OF BRCA2 reversion mutations associated with resistance to PARP inhibitors. <i>Cancer Discov</i> 2017;7(9):999-1005.                                                                                                                                                                                                                                                                                                                                                                                                                                                                                                                                                                                           | Not relevant study design |
| [188] Raymond C, Hernandez J, Brobey R, Wang Y, Potts K, Garg K, et al. Detection of HRD gene mutations and copy number changes in cfDNA from prostate cancer patients. In: American Society of Clinical Oncology Annual Meeting 2017; 02-Jun-2017, 2017. Available from: American Society of Clinical Oncology (ASCO) <a href="https://discovery.northernlight.com/document.php?datasource=PHE&amp;docid=PE20170614000002290&amp;context=WK%40northernlight.com">https://discovery.northernlight.com/document.php?datasource=PHE&amp;docid=PE20170614000002290&amp;context=WK%40northernlight.com</a><br><a href="http://ovidsp.ovid.com/ovidweb.cgi?T=JS&amp;CSC=Y&amp;NEWS=N&amp;PAGE=fulltext&amp;D=dscv6&amp;AN=PE20170614000002290">http://ovidsp.ovid.com/ovidweb.cgi?T=JS&amp;CSC=Y&amp;NEWS=N&amp;PAGE=fulltext&amp;D=dscv6&amp;AN=PE20170614000002290</a> | Duplicate                 |
| [189] Raymond C, Hernandez J, Brobey R, Wang Y, Potts K, Garg K, et al. Detection of HRD gene mutations and copy number changes in cfDNA from prostate cancer patients. <i>J Clin Oncol</i> 2017.                                                                                                                                                                                                                                                                                                                                                                                                                                                                                                                                                                                                                                                                   | No data (abstract)        |
| [190] Reichert Z, Carneiro BA, Daignault-Newton S, Sullivan A, Feng FY-C, Morgan TM, et al. A randomized phase II trial of abiraterone, olaparib or abiraterone + olaparib in patients with metastatic castration-resistant prostate cancer with DNA repair defects. In: American Society of Clinical Oncology Annual Meeting 2017; 02-Jun-2017, 2017. Available from: American Society of Clinical Oncology (ASCO) <a href="https://discovery.northernlight.com/document.php?datasource=PHE&amp;docid=PE20170614020002180&amp;context=WK%4">https://discovery.northernlight.com/document.php?datasource=PHE&amp;docid=PE20170614020002180&amp;context=WK%4</a>                                                                                                                                                                                                     | Duplicate                 |



|                                                                                                                                                                                                                                                                                                                                                                                                                                                                                                                                                                                                                                                                                                                                                                                                                                                                                                                                                                                                                                                                                                                                                          |                              |
|----------------------------------------------------------------------------------------------------------------------------------------------------------------------------------------------------------------------------------------------------------------------------------------------------------------------------------------------------------------------------------------------------------------------------------------------------------------------------------------------------------------------------------------------------------------------------------------------------------------------------------------------------------------------------------------------------------------------------------------------------------------------------------------------------------------------------------------------------------------------------------------------------------------------------------------------------------------------------------------------------------------------------------------------------------------------------------------------------------------------------------------------------------|------------------------------|
| <p>Onorthernlight.com<br/> <a href="http://ovidsp.ovid.com/ovidweb.cgi?T=JS&amp;CSC=Y&amp;NEWS=N&amp;PAGE=fulltext&amp;D=dscv6&amp;AN=PE20170614020002180">http://ovidsp.ovid.com/ovidweb.cgi?T=JS&amp;CSC=Y&amp;NEWS=N&amp;PAGE=fulltext&amp;D=dscv6&amp;AN=PE20170614020002180</a></p>                                                                                                                                                                                                                                                                                                                                                                                                                                                                                                                                                                                                                                                                                                                                                                                                                                                                 |                              |
| <p>[191] Reichert Z, Carneiro BA, Daignault-Newton S, Sullivan A, Feng FYC, Morgan TM, et al. A randomized phase II trial of abiraterone, olaparib or abiraterone + olaparib in patients with metastatic castration-resistant prostate cancer with DNA repair defects. <i>J Clin Oncol</i> 2017.</p>                                                                                                                                                                                                                                                                                                                                                                                                                                                                                                                                                                                                                                                                                                                                                                                                                                                     | No data (abstract)           |
| <p>[192] Rescigno P, Rodrigues DN, Yuan W, Carreira S, Lambros M, Seed G, et al. Mismatch repair defects in lethal prostate cancer. <i>Cancer Res</i> 2017.</p>                                                                                                                                                                                                                                                                                                                                                                                                                                                                                                                                                                                                                                                                                                                                                                                                                                                                                                                                                                                          | No DDR mutation/not relevant |
| <p>[193] Romero-Laorden N, Pineiro-Yanez E, Gutierrez-Pecharroman A, Pacheco MI, Calvo E, Al-Shahrour F, et al. Somatic BRCA2 bi-allelic loss in the primary prostate cancer was associated to objective response to PARPi in a sporadic CRPC patient. <i>Ann Oncol</i> 2017;28(5):1158-1159.</p>                                                                                                                                                                                                                                                                                                                                                                                                                                                                                                                                                                                                                                                                                                                                                                                                                                                        | Not relevant study design    |
| <p>[194] Royal Marsden N. H. S. Foundation Trust, Institute of Cancer Research, AstraZeneca. Trial of olaparib in combination with AZD5363 (ComPAKT). NCT02338622. In: <i>ClinicalTrials.gov</i> [Internet]. Bethesda (MD): National Library of Medicine (US). 2015 [accessed 11.12.17]. Available from: <a href="https://ClinicalTrials.gov/show/NCT02338622">https://ClinicalTrials.gov/show/NCT02338622</a></p>                                                                                                                                                                                                                                                                                                                                                                                                                                                                                                                                                                                                                                                                                                                                       | No relevant outcome          |
| <p>[195] Rubinstein WS, Selkirk CG, Pullum C, Kaul KL, Brendler CB, Shevrin DH, et al. Identification of men with a genetic predisposition to prostate cancer: Targeted screening of BRCA1 and BRCA2 mutation carriers and controls the impact study pilot results. <i>J Urol</i> 2009;181(4 SUPPL. 1):644.</p>                                                                                                                                                                                                                                                                                                                                                                                                                                                                                                                                                                                                                                                                                                                                                                                                                                          | Not a relevant population    |
| <p>[196] Ryan CJ, Watkins SP, Despain D, Karlovich CA, Simmons A, Golsorkhi AA, et al. Trial of rucaparib in prostate indications 3 (TRITON3): An international, multicenter, randomized, open-label phase 3 study of rucaparib vs physician's choice of therapy for patients (pts) with metastatic castration-resistant prostate cancer (MCRPC) associated with homologous recombination deficiency (HRD). In: <i>American Society of Clinical Oncology Annual Meeting 2017; 02-Jun-2017, 2017</i>. Available from: <i>American Society of Clinical Oncology (ASCO)</i><br/> <a href="https://discovery.northernlight.com/document.php?datasource=PHE&amp;docid=PE20170614030002110&amp;context=WK%40northernlight.com">https://discovery.northernlight.com/document.php?datasource=PHE&amp;docid=PE20170614030002110&amp;context=WK%40northernlight.com</a><br/> Onorthernlight.com<br/> <a href="http://ovidsp.ovid.com/ovidweb.cgi?T=JS&amp;CSC=Y&amp;NEWS=N&amp;PAGE=fulltext&amp;D=dscv6&amp;AN=PE20170614030002110">http://ovidsp.ovid.com/ovidweb.cgi?T=JS&amp;CSC=Y&amp;NEWS=N&amp;PAGE=fulltext&amp;D=dscv6&amp;AN=PE20170614030002110</a></p> | Duplicate                    |
| <p>[197] Ryan CJ, Watkins SP, Despain D, Karlovich CA, Simmons A, Golsorkhi AA, et al. Trial of rucaparib in prostate indications 3 (TRITON3): An international, multicenter, randomized, open-label phase 3 study of rucaparib vs physician's choice of therapy for patients (pts) with metastatic castration-resistant prostate cancer (mCRPC) associated with homologous recombination deficiency (HRD). <i>J Clin Oncol</i> 2017.</p>                                                                                                                                                                                                                                                                                                                                                                                                                                                                                                                                                                                                                                                                                                                | No data (abstract)           |
| <p>[198] Salami S, Hovelson D, Udager A, Lee M, Curci N, Kaplan J, et al. Molecular characterization of magnetic resonance imaging visible and invisible prostate cancer: Biological insights and therapeutic implications. <i>Eur Urol, Supplements</i> 2017.</p>                                                                                                                                                                                                                                                                                                                                                                                                                                                                                                                                                                                                                                                                                                                                                                                                                                                                                       | No data (abstract)           |

|                                                                                                                                                                                                                                                                                                                                                                                                                                |                              |
|--------------------------------------------------------------------------------------------------------------------------------------------------------------------------------------------------------------------------------------------------------------------------------------------------------------------------------------------------------------------------------------------------------------------------------|------------------------------|
| [199] Salami S, Hovelson D, Udager A, Lee M, Curci N, Kaplan J, et al. Targeted next generation sequencing to characterize magnetic resonance imaging visible and invisible prostate cancer: Biological insights and therapeutic implications. <i>J Urol</i> 2017.                                                                                                                                                             | No data (abstract)           |
| [200] Sanchez A, Shui IM, Schoenfeld J, Nguyen P, Penney K, Fiorentino M, et al. BRCA1 single nucleotide polymorphisms (SNPs) may help identify patients at risk for lethal prostate cancer or recurrence after treatment with radiation therapy (RT). <i>J Urol</i> 2014;191(4 SUPPL. 1):e832-e833.                                                                                                                           | No relevant outcome          |
| [201] Sanchez A, Schoenfeld JD, Nguyen PL, Fiorentino M, Chowdhury D, Stampfer MJ, et al. Common variation in BRCA1 may have a role in progression to lethal prostate cancer after radiation treatment. <i>Prostate Cancer Prostatic Dis</i> 2016;19(2):197-201.                                                                                                                                                               | No relevant outcome          |
| [202] Sandhu SK, Moreno V, Wilding G, Omlin A, Schelman WR, Miranda S, et al. Phase I study of a poly(ADP)-ribose polymerase (PARP) inhibitor MK-4827 (MK) with antitumour activity in sporadic castration resistant prostate cancer (CRPC). <i>Asia Pac J Clin Oncol</i> 2012;8:33.                                                                                                                                           | No DDR mutation/not relevant |
| [203] Sandhu SK, Schelman WR, Wilding G, Moreno V, Baird RD, Miranda S, et al. The poly(ADP-ribose) polymerase inhibitor niraparib (MK4827) in BRCA mutation carriers and patients with sporadic cancer: a phase 1 dose-escalation trial. <i>Lancet Oncol</i> 2013;14(9):882-892.                                                                                                                                              | Not relevant study design    |
| [204] Sandhu S, Mateo J, Miranda S, Carreira S, Jain S, Ralph C, et al. Antitumour activity of the poly(ADP-ribose) polymerase (PARP) inhibitor olaparib in unselected sporadic castration resistant prostate cancer (CRPC) in the TOPARP trial. <i>Asia Pac J Clin Oncol</i> 2015;11:28-29.                                                                                                                                   | Not relevant study design    |
| [205] Scharrer U, Skrzypczak-Zielinska M, Wituszynska W, Froster UG. Analysis of allelic variants in the CHEK2 gene using DHPLC. Study on the Eastern Germany population. <i>Medizinische Genetik</i> 2010; Conference Publication:(var. pagings). 22 (1):100-101.                                                                                                                                                             | Not a relevant population    |
| [206] Scher HI, Jendrisak A, Schreiber NA, McLaughlin B, Graf RP, Rodriguez A, et al. Baseline CTC subtype to predict outcomes on mCRPC patients (pts) receiving enzalutamide (E) compared to abiraterone (A). <i>J Clin Oncol</i> 2017.                                                                                                                                                                                       | No DDR mutation/not relevant |
| [207] Schrader KA, Cheng DT, Vijai J, Prasad M, Walsh MF, Zehir A, et al. Potential burden of germline findings in targeted tumor sequencing using matched normal DNA. <i>Cancer Res</i> 2015.                                                                                                                                                                                                                                 | No data (abstract)           |
| [208] Schwarzenbach H, Alix-Panabieres C, Muller I, Letang N, Vendrell JP, Rebillard X, et al. Cell-free tumor DNA in blood plasma as a marker for circulating tumor cells in prostate cancer. <i>Clin Cancer Res</i> 2009;15(3):1032-1038.                                                                                                                                                                                    | No relevant outcome          |
| [209] Seattle Institute for Biomedical and Clinical Research. Docetaxel and carboplatin for patients with mCRPC and DNA-repair deficiencies. NCT02985021. In: WHO International Clinical Trials Registry Platform (ICTRP) [Internet]. Geneva: World Health Organization (WHO). 2016 [accessed 12.12.17]. Available from: <a href="https://clinicaltrials.gov/show/NCT02985021">https://clinicaltrials.gov/show/NCT02985021</a> | No relevant outcome          |
| [210] Seed G, Yuan W, Mateo J, Carreira S, Bertan C, Lambros M, et al. Gene copy number estimation from targeted                                                                                                                                                                                                                                                                                                               | No DDR mutation/not          |

|                                                                                                                                                                                                                                                                                                                                                                                                                                                                                                                                                                                                                                                                                                                                                                                                                                                                                                                                                                                                                                                                                                                                                                                                                                     |                              |
|-------------------------------------------------------------------------------------------------------------------------------------------------------------------------------------------------------------------------------------------------------------------------------------------------------------------------------------------------------------------------------------------------------------------------------------------------------------------------------------------------------------------------------------------------------------------------------------------------------------------------------------------------------------------------------------------------------------------------------------------------------------------------------------------------------------------------------------------------------------------------------------------------------------------------------------------------------------------------------------------------------------------------------------------------------------------------------------------------------------------------------------------------------------------------------------------------------------------------------------|------------------------------|
| next-generation sequencing of prostate cancer biopsies: Analytic validation and clinical qualification. Clin Cancer Res 2017;23(20):6070-6077.                                                                                                                                                                                                                                                                                                                                                                                                                                                                                                                                                                                                                                                                                                                                                                                                                                                                                                                                                                                                                                                                                      | relevant                     |
| [211] Seed G, Yuan W, Mateo J, Carreira S, Lambros M, Boysen G, et al. Copy number estimation from targeted amplicon-based nextgeneration sequencing of castration-resistant prostate cancer biopsies: Analytic validation and clinical qualification for a iPARP clinical trial. Cancer Res 2017.                                                                                                                                                                                                                                                                                                                                                                                                                                                                                                                                                                                                                                                                                                                                                                                                                                                                                                                                  | No DDR mutation/not relevant |
| [212] Seng SM, Galsky MD, Tsao C, Li J, Febbo PG, Oh WK. Predicting response to platinum chemotherapy in metastatic castration-resistant prostate cancer (mCRPC) using a genomic signature for "BRCAness": A phase II clinical trial of satraplatin in men with mCRPC who have progressed on docetaxel. J Clin Oncol 2011.                                                                                                                                                                                                                                                                                                                                                                                                                                                                                                                                                                                                                                                                                                                                                                                                                                                                                                          | No data (abstract)           |
| [213] Setton J, Riaz N, Higginson DS, McBride S, Kollmeier M, Zelefsky MJ, et al. Localized prostate cancers with genetic defects in DNA repair display evidence of functional deficit in homologous recombination. Int J Radiat Oncol 2016.                                                                                                                                                                                                                                                                                                                                                                                                                                                                                                                                                                                                                                                                                                                                                                                                                                                                                                                                                                                        | No DDR mutation/not relevant |
| [214] Shapiro J, Voskoboynik M, Krieger L, Byard I, Clay T, Ganju V, et al. Trial of rucaparib in prostate indications 2 (TRITON2): an international, multicentre, open-label phase 2 study of the parp inhibitor rucaparib in patients with metastatic castration-resistant prostate cancer (MCRPC) associated with homologous recombination deficiency (HRD). Asia-pacific journal of clinical oncology. Conference: annual scientific meeting of the Australian and New Zealand Urogenital and Prostate, ANZUP 2017. Australia 2017;13:61.                                                                                                                                                                                                                                                                                                                                                                                                                                                                                                                                                                                                                                                                                       | No relevant outcome          |
| [215] Sidney Kimmel Comprehensive Cancer Center. Olaparib in men with high-risk biochemically-recurrent prostate cancer following radical prostatectomy, with integrated biomarker analysis. NCT03047135. In: ClinicalTrials.gov [Internet]. Bethesda (MD): National Library of Medicine (US). 2021 [accessed 11.12.17]. Available from: <a href="https://ClinicalTrials.gov/show/NCT03047135">https://ClinicalTrials.gov/show/NCT03047135</a>                                                                                                                                                                                                                                                                                                                                                                                                                                                                                                                                                                                                                                                                                                                                                                                      | No relevant outcome          |
| [216] Sofronescu AG, Marshall D, Zhu Y. TGFbeta1 -509 C>T and XRCC1 399 Arg>Gln (28152G>A) correlate with increased side effects induced by radiotherapy in prostate cancer patients. Clin Chem 2012;58(10 SUPPL. 1):A42.                                                                                                                                                                                                                                                                                                                                                                                                                                                                                                                                                                                                                                                                                                                                                                                                                                                                                                                                                                                                           | No data (abstract)           |
| [217] Sonpavde G, Nagy RJ, Agarwal N, Gourdin TS, Naik G, Eshaghian S, et al. Profiling of circulating tumor (ct)-DNA for potentially actionable targets in prostate cancer (PCa). J Clin Oncol 2016.                                                                                                                                                                                                                                                                                                                                                                                                                                                                                                                                                                                                                                                                                                                                                                                                                                                                                                                                                                                                                               | No data (abstract)           |
| [218] Sonpavde G, Nagy RJ, Sartor AO, Pond GR, Gourdin TS, Nandagopal L, et al. Circulating tumor (ct)-DNA alterations in metastatic castration-resistant prostate cancer (MCRPC): Association with outcomes and evolution with therapy. In: American Society of Clinical Oncology Genitourinary Cancers Symposium 2017; 16-Feb-2017, 2017. Available from: American Society of Clinical Oncology (ASCO) <a href="https://discovery.northernlight.com/document.php?datasource=PHE&amp;docid=PE20170222000004320&amp;context=WK%40northernlight.com&amp;doctype=abstract&amp;docurl=http%3A%2F%2Fmeetinglibrary.asco.org%2Fcontent%2F179025-197&amp;token=7a4520a922b98e3a58a0d73299a7bb97">https://discovery.northernlight.com/document.php?datasource=PHE&amp;docid=PE20170222000004320&amp;context=WK%40northernlight.com&amp;doctype=abstract&amp;docurl=http%3A%2F%2Fmeetinglibrary.asco.org%2Fcontent%2F179025-197&amp;token=7a4520a922b98e3a58a0d73299a7bb97</a><br><a href="http://ovidsp.ovid.com/ovidweb.cgi?T=JS&amp;CSC=Y&amp;NEWS=N&amp;PAGE=fulltext&amp;D=dscv6&amp;AN=PE20170222000004320">http://ovidsp.ovid.com/ovidweb.cgi?T=JS&amp;CSC=Y&amp;NEWS=N&amp;PAGE=fulltext&amp;D=dscv6&amp;AN=PE20170222000004320</a> | Duplicate                    |

|                                                                                                                                                                                                                                                                                                                                                                                                                                                                                                                                                                                                                                                                                                                                                                                                                                                                                                                                                                                                                                                                                                                                                                                                                            |                              |
|----------------------------------------------------------------------------------------------------------------------------------------------------------------------------------------------------------------------------------------------------------------------------------------------------------------------------------------------------------------------------------------------------------------------------------------------------------------------------------------------------------------------------------------------------------------------------------------------------------------------------------------------------------------------------------------------------------------------------------------------------------------------------------------------------------------------------------------------------------------------------------------------------------------------------------------------------------------------------------------------------------------------------------------------------------------------------------------------------------------------------------------------------------------------------------------------------------------------------|------------------------------|
| [219] Steinberger AE, Cotogno P, Ledet EM, Lewis B, Sartor O. Exceptional duration of radium-223 in prostate cancer with a BRCA2 mutation. <i>Clin Genitourin Cancer</i> 2017;15(1):e69-e71.                                                                                                                                                                                                                                                                                                                                                                                                                                                                                                                                                                                                                                                                                                                                                                                                                                                                                                                                                                                                                               | No relevant outcome          |
| [220] Struss WJ, Annala M, Warner EW, Beja K, Vandekerkhove G, Wong A, et al. Germline DNA repair mutations in metastatic castration-resistant prostate cancer: Therapy response and applicability of circulating tumor DNA. In: American Society of Clinical Oncology Genitourinary Cancers Symposium 2017; 16-Feb-2017, 2017. Available from: American Society of Clinical Oncology (ASCO)<br><a href="https://discovery.northernlight.com/document.php?datasource=PHE&amp;docid=PE20170222020001580&amp;context=WK%40northernlight.com&amp;doctype=abstract&amp;docurl=http%3A%2F%2Fmeetinglibrary.asco.org%2Fcontent%2F179168-197&amp;token=a48f237b2d840269c2c5d618dc325bbf">https://discovery.northernlight.com/document.php?datasource=PHE&amp;docid=PE20170222020001580&amp;context=WK%40northernlight.com&amp;doctype=abstract&amp;docurl=http%3A%2F%2Fmeetinglibrary.asco.org%2Fcontent%2F179168-197&amp;token=a48f237b2d840269c2c5d618dc325bbf</a><br><a href="http://ovidsp.ovid.com/ovidweb.cgi?T=JS&amp;CSC=Y&amp;NEWS=N&amp;PAGE=fulltext&amp;D=dscv6&amp;AN=PE20170222020001580">http://ovidsp.ovid.com/ovidweb.cgi?T=JS&amp;CSC=Y&amp;NEWS=N&amp;PAGE=fulltext&amp;D=dscv6&amp;AN=PE20170222020001580</a> | Duplicate                    |
| [221] Taneja SS. Re: Inherited DNA-repair gene mutations in men with metastatic prostate cancer. <i>J Urol</i> 2017;197(2):399-400.                                                                                                                                                                                                                                                                                                                                                                                                                                                                                                                                                                                                                                                                                                                                                                                                                                                                                                                                                                                                                                                                                        | Not primary research         |
| [222] The Institute of Cancer Research. The BARCODE 2 study—The use of genetic profiling to guide prostate cancer treatment. EUCTR2016-000869-23-GB. In: WHO International Clinical Trials Registry Platform (ICTRP) [Internet]. Geneva: World Health Organization (WHO). 2016 [accessed 12.12.17]. Available from: <a href="https://www.clinicaltrialsregister.eu/ctr-search/search?query=eudract_number:2016-000869-23">https://www.clinicaltrialsregister.eu/ctr-search/search?query=eudract_number:2016-000869-23</a>                                                                                                                                                                                                                                                                                                                                                                                                                                                                                                                                                                                                                                                                                                  | No relevant outcome          |
| [223] Timms K, Cuzick J, Neff C, Reid J, Solimeno C, Sangale Z, et al. The molecular landscape of genome instability in prostate cancer (PC). In: European Society for Medical Oncology Congress 2016; 07-Oct-2016, 2016. Available from: European Society for Medical Oncology (ESMO)<br><a href="https://discovery.northernlight.com/document.php?datasource=PHE&amp;docid=PE20161025790000810&amp;context=WK%40northernlight.com">https://discovery.northernlight.com/document.php?datasource=PHE&amp;docid=PE20161025790000810&amp;context=WK%40northernlight.com</a><br><a href="http://ovidsp.ovid.com/ovidweb.cgi?T=JS&amp;CSC=Y&amp;NEWS=N&amp;PAGE=fulltext&amp;D=dscv6&amp;AN=PE20161025790000810">http://ovidsp.ovid.com/ovidweb.cgi?T=JS&amp;CSC=Y&amp;NEWS=N&amp;PAGE=fulltext&amp;D=dscv6&amp;AN=PE20161025790000810</a>                                                                                                                                                                                                                                                                                                                                                                                     | Duplicate                    |
| [224] Timms K, Cuzick J, Neff C, Reid J, Solimeno C, Sangale Z, et al. The molecular landscape of genome instability in prostate cancer (PC). <i>Ann Oncol</i> 2016.                                                                                                                                                                                                                                                                                                                                                                                                                                                                                                                                                                                                                                                                                                                                                                                                                                                                                                                                                                                                                                                       | No data (abstract)           |
| [225] Tischkowitz M, Eeles R, Grönberg H. Mutations in BRCA1 and BRCA2 and predisposition to prostate cancer...Grönberg H. Prostate cancer epidemiology. <i>Lancet</i> 2003;361:859-64. <i>Lancet</i> 2003;362 North American Edition(9377):80-80.                                                                                                                                                                                                                                                                                                                                                                                                                                                                                                                                                                                                                                                                                                                                                                                                                                                                                                                                                                         | Not primary research         |
| [226] Topka S, Walsh MF, Maria A, Lincoln A, Mandelker D, Zhang L, et al. Germline mutations in NBN conferring DNA damage response defects are found in patients with multiple cancer types. <i>Cancer Res</i> 2017.                                                                                                                                                                                                                                                                                                                                                                                                                                                                                                                                                                                                                                                                                                                                                                                                                                                                                                                                                                                                       | No data (abstract)           |
| [227] Turner P, Jain S, Mitchell D, Hounsell A, Prise K, Biggart S, et al. The ADRRAD trial: Neo-adjuvant androgen deprivation therapy, pelvic radiotherapy and radium-223 for new presentation T1-4 N0-1 M1b adenocarcinoma of                                                                                                                                                                                                                                                                                                                                                                                                                                                                                                                                                                                                                                                                                                                                                                                                                                                                                                                                                                                            | No DDR mutation/not relevant |

|                                                                                                                                                                                                                                                                                                                                                                                                                                                                                                                                                                                                                                                                                                       |                              |
|-------------------------------------------------------------------------------------------------------------------------------------------------------------------------------------------------------------------------------------------------------------------------------------------------------------------------------------------------------------------------------------------------------------------------------------------------------------------------------------------------------------------------------------------------------------------------------------------------------------------------------------------------------------------------------------------------------|------------------------------|
| prostate. In: National Cancer Research Institute Cancer Conference 2016; 06-Nov-2016, 2016. Available from: National Cancer Research Institute (NCRI)<br><a href="https://discovery.northernlight.com/document.php?datasource=PHE&amp;docid=PE20161208390004310&amp;context=WK%40northernlight.com">https://discovery.northernlight.com/document.php?datasource=PHE&amp;docid=PE20161208390004310&amp;context=WK%40northernlight.com</a><br><a href="http://ovidsp.ovid.com/ovidweb.cgi?T=JS&amp;CSC=Y&amp;NEWS=N&amp;PAGE=fulltext&amp;D=dscv6&amp;AN=PE20161208390004310">http://ovidsp.ovid.com/ovidweb.cgi?T=JS&amp;CSC=Y&amp;NEWS=N&amp;PAGE=fulltext&amp;D=dscv6&amp;AN=PE20161208390004310</a> |                              |
| [228] University of California San Francisco. Pembrolizumab in metastatic castration resistant prostate cancer (mCRPC) with or without DNA damage repair defects. NCT03248570. In: WHO International Clinical Trials Registry Platform (ICTRP) [Internet]. Geneva: World Health Organization (WHO). 2017 [accessed 12.12.17]. Available from: <a href="https://clinicaltrials.gov/show/NCT03248570">https://clinicaltrials.gov/show/NCT03248570</a>                                                                                                                                                                                                                                                   | No relevant outcome          |
| [229] University of Washington. Docetaxel and carboplatin in treating patients with metastatic, castration resistant prostate cancer containing inactivated genes in the BRCA 1/2 pathway. NCT02598895. In: WHO International Clinical Trials Registry Platform (ICTRP) [Internet]. Geneva: World Health Organization (WHO). 2015 [accessed 12.12.17]. Available from: <a href="https://clinicaltrials.gov/show/NCT02598895">https://clinicaltrials.gov/show/NCT02598895</a>                                                                                                                                                                                                                          | No relevant outcome          |
| [230] University of Washington. Durvalumab in treating patients with metastatic hormone-resistant prostate cancer. NCT02966587. In: WHO International Clinical Trials Registry Platform (ICTRP) [Internet]. Geneva: World Health Organization (WHO). 2016 [accessed 12.12.17]. Available from: <a href="https://clinicaltrials.gov/show/NCT02966587">https://clinicaltrials.gov/show/NCT02966587</a>                                                                                                                                                                                                                                                                                                  | Not relevant study design    |
| [231] Velasco A, Hewitt SM, Albert PS, HosseinSaboorian M, Rosenberg H, Martinez C, et al. Differential expression of the mismatch repair gene hMSH2 in malignant prostate tissue is associated with cancer recurrence. <i>Cancer</i> 2002;94(3):690-699.                                                                                                                                                                                                                                                                                                                                                                                                                                             | No DDR mutation/not relevant |
| [232] Vesprini D, Narod SA, Trachtenberg J, Crook J, Jalali F, Preiner J, et al. The therapeutic ratio is preserved for radiotherapy or cisplatin treatment in BRCA2-mutated prostate cancers. <i>Can Urol Assoc J</i> 2011;5(2):E31-E35.                                                                                                                                                                                                                                                                                                                                                                                                                                                             | Not relevant study design    |
| [233] Wang L, Xia S, Du M, Ditmar R, Yuan T, Guo Y, et al. Plasma genetic and genomic abnormalities predict treatment response and clinical outcome in advanced prostate cancer. <i>Cancer Res</i> 2015.                                                                                                                                                                                                                                                                                                                                                                                                                                                                                              | No data (abstract)           |
| [234] Watson AJ, Sabharwal A, Thorncroft M, McGown G, Kerr R, Bojanic S, et al. Tumor O(6)-methylguanine-DNA methyltransferase inactivation by oral lomeguatrib. <i>Clin Cancer Res</i> 2010;16(2):743-749.                                                                                                                                                                                                                                                                                                                                                                                                                                                                                           | No DDR mutation/not relevant |
| [235] Weill Medical College of Cornell University. Epidemiologic, clinical and genetic profile of prostate cancer in Arab countries. NCT00801996. In: WHO International Clinical Trials Registry Platform (ICTRP) [Internet]. Geneva: World Health Organization (WHO). 2008 [accessed 12.12.17]. Available from: <a href="https://clinicaltrials.gov/show/NCT00801996">https://clinicaltrials.gov/show/NCT00801996</a>                                                                                                                                                                                                                                                                                | Not relevant study design    |
| [236] Wenham R, Wilding G, Baird R, Sun L, Toniatti C, Stroh M, et al. First in human trial of the poly(ADP)-ribose polymerase inhibitor MK-4827 in patients with advanced cancer with antitumor activity in BRCA-deficient and sporadic ovarian cancers. <i>Gynecol Oncol</i> 2011;120:S5-S6.                                                                                                                                                                                                                                                                                                                                                                                                        | No data (abstract)           |

|                                                                                                                                                                                                                                                                                                                                                                                                                                                                                                                                                                                                                                                                                                                                                                                                                                                                     |                              |
|---------------------------------------------------------------------------------------------------------------------------------------------------------------------------------------------------------------------------------------------------------------------------------------------------------------------------------------------------------------------------------------------------------------------------------------------------------------------------------------------------------------------------------------------------------------------------------------------------------------------------------------------------------------------------------------------------------------------------------------------------------------------------------------------------------------------------------------------------------------------|------------------------------|
| [237] Wyatt AW, Azad AA, Volik SV, Annala M, Beja K, McConeghy B, et al. Genomic alterations in cell-free DNA and enzalutamide resistance in castration-resistant prostate cancer. <i>JAMA Oncol</i> 2016;2(12):1598-1606.                                                                                                                                                                                                                                                                                                                                                                                                                                                                                                                                                                                                                                          | Not a relevant population    |
| [238] Wyatt AW, Annala M, Beja K, Parimi S, Vandekerkhove G, Warner E, et al. Genomic alterations in circulating tumor DNA (ctDNA) are associated with clinical outcomes in treatment-naive metastatic castration-resistant prostate cancer (mCRPC) patients commencing androgen receptor (AR)-targeted therapy. <i>Ann Oncol</i> 2016.                                                                                                                                                                                                                                                                                                                                                                                                                                                                                                                             | Not relevant study design    |
| [239] Wyatt AW, Annala M, Parimi S, Zulfiqar M, Finch DL, Oja CD, et al. Circulating tumor DNA (ctDNA) burden and actionable mutations in treatment-naive metastatic castration-resistant prostate cancer (mCRPC). <i>J Clin Oncol</i> 2016.                                                                                                                                                                                                                                                                                                                                                                                                                                                                                                                                                                                                                        | No data (abstract)           |
| [240] Yadav S, Makridakis N. Targeted next-generation sequencing in DNA repair genes in prostate tumors. <i>Cancer Res</i> 2013.                                                                                                                                                                                                                                                                                                                                                                                                                                                                                                                                                                                                                                                                                                                                    | No data (abstract)           |
| [241] Yadav S, Anbalagan M, Baddoo M, Flemington E, Moroz K, Hering-Smith K, et al. Landscape of somatic mutations in DNA repair genes in prostate cancer. In: American Association for Cancer Research Annual Meeting 2016; 16-Apr-2016, 2016. Available from: American Association for Cancer Research (AACR) <a href="https://discovery.northernlight.com/document.php?datasource=PHE&amp;docid=PE20160330190002422&amp;context=WK%40northernlight.com">https://discovery.northernlight.com/document.php?datasource=PHE&amp;docid=PE20160330190002422&amp;context=WK%40northernlight.com</a><br><a href="http://ovidsp.ovid.com/ovidweb.cgi?T=JS&amp;CSC=Y&amp;NEWS=N&amp;PAGE=fulltext&amp;D=dscv6&amp;AN=PE20160330190002422">http://ovidsp.ovid.com/ovidweb.cgi?T=JS&amp;CSC=Y&amp;NEWS=N&amp;PAGE=fulltext&amp;D=dscv6&amp;AN=PE20160330190002422</a>        | Duplicate                    |
| [242] Yadav S, Anbalagan M, Baddoo M, Flemington E, Moroz K, Hering-Smith K, et al. Landscape of somatic mutations in DNA repair genes in prostate cancer. <i>Cancer Res</i> 2016.                                                                                                                                                                                                                                                                                                                                                                                                                                                                                                                                                                                                                                                                                  | No data (abstract)           |
| [243] Zanusso C, Bortolus R, Dreussi E, Polesel J, Montico M, Cecchin E, et al. Impact of DNA repair gene polymorphisms on the risk of biochemical recurrence after radiotherapy and overall survival in prostate cancer. <i>Oncotarget</i> 2017;8(14):22863-22875.                                                                                                                                                                                                                                                                                                                                                                                                                                                                                                                                                                                                 | No DDR mutation/not relevant |
| [244] Zhang T, Romanel A, Kluk MJ, Eng K, Iossifov I, Sboner A, et al. Germline variants and secondary findings in a cancer precision medicine cohort. <i>Lab Invest</i> 2016;96:461A.                                                                                                                                                                                                                                                                                                                                                                                                                                                                                                                                                                                                                                                                              | No relevant outcome          |
| [245] Zheng L, Wang F, Qian C, Neumann RM, Cheville JC, Tindall DJ, et al. Unique substitution of CHEK2 and TP53 mutations implicated in primary prostate tumors and cancer cell lines. <i>Hum Mutat</i> 2006;27(10):1062-1063.                                                                                                                                                                                                                                                                                                                                                                                                                                                                                                                                                                                                                                     | No DDR mutation/not relevant |
| [246] Zheng SL, Na R, Han M, Novakovic K, Wiley K, Isaacs S, et al. Chek2 Mutations increase risk for prostate cancer but do not differentiate risk of lethal from indolent disease. In: American Urological Association Annual Meeting 2017; 12-May-2017, 2017. Available from: American Urological Association (AUA) <a href="https://discovery.northernlight.com/document.php?datasource=PHE&amp;docid=PE20170518150000980&amp;context=WK%40northernlight.com">https://discovery.northernlight.com/document.php?datasource=PHE&amp;docid=PE20170518150000980&amp;context=WK%40northernlight.com</a><br><a href="http://ovidsp.ovid.com/ovidweb.cgi?T=JS&amp;CSC=Y&amp;NEWS=N&amp;PAGE=fulltext&amp;D=dscv6&amp;AN=PE20170518150000980">http://ovidsp.ovid.com/ovidweb.cgi?T=JS&amp;CSC=Y&amp;NEWS=N&amp;PAGE=fulltext&amp;D=dscv6&amp;AN=PE20170518150000980</a> | Duplicate                    |

|                                                                                                                                                                                                                                                                                                                   |                              |
|-------------------------------------------------------------------------------------------------------------------------------------------------------------------------------------------------------------------------------------------------------------------------------------------------------------------|------------------------------|
| [247] Agalliu I, Kwon EM, Salinas CA, Koopmeiners JS, Ostrander EA, Stanford JL. Genetic variation in DNA repair genes and prostate cancer risk: results from a population-based study. <i>Cancer Causes Control</i> 2010;21(2):289-300.                                                                          | No DDR mutation/not relevant |
| [248] Basu S, Majumder S, Bhowal A, Gupta A, Sengupta S. Interplay between genetic and epigenetic machinery in the etiopathogenesis of prostate cancer. <i>J Cell Comm Signaling</i> 2013;7(1):99-100.                                                                                                            | No DDR mutation/not relevant |
| [249] Cypriano AS, Alves G, Ornellas AA, Scheinkman J, Almeida R, Scherrer L, et al. Relationship between XPD, RAD51, and APEX1 DNA repair genotypes and prostate cancer risk in the male population of Rio de Janeiro, Brazil. <i>Genet</i> 2017;40(4):751-758.                                                  | No DDR mutation/not relevant |
| [250] Gallagher D, Gaudet M, Pal P, Kirchoff T, Bhatia J, Fine S, et al. BRCA mutations, risk and outcome of prostate cancer. <i>Curr Oncol</i> 2009;16(5):99.                                                                                                                                                    | No data (abstract)           |
| [251] Kaku H, Huang P, Sakai A, Watanabe M, Chen J, Saika T, et al. Comprehensive analyses of genetic predisposition for prostate cancer in Japanese men. Presented at the 30th Congress of the Societe Internationale d'Urologie (SIU); 1-5 Nov 2009; Shanghai: China. <i>Urology</i> 2009;74(4 (suppl S)):S116. | No data (abstract)           |
| [252] Southey MC, Goldgar DE, Winqvist R, Pylkas K, Couch F, Tischkowitz M, et al. <i>PALB2</i> , <i>CHEK2</i> and <i>ATM</i> rare variants and cancer risk: data from COGS. <i>J Med Genet</i> 2016;53(12):800-811.                                                                                              | No relevant outcome          |
| [253] Sandhu SK, Omlin A, Hylands L, Miranda S, Barber LJ, Riisnaes R, et al. Poly (ADP-ribose) polymerase (PARP) inhibitors for the treatment of advanced germline BRCA2 mutant prostate cancer. <i>Ann Oncol</i> 2013;24(5):1416-8.                                                                             | Not relevant study design    |
| [254] <a href="https://clinicaltrials.gov/ct2/show/NCT03395197">https://clinicaltrials.gov/ct2/show/NCT03395197</a>                                                                                                                                                                                               | Not relevant study design    |
| [255] <a href="https://clinicaltrials.gov/ct2/show/NCT00749502">https://clinicaltrials.gov/ct2/show/NCT00749502</a>                                                                                                                                                                                               | Not relevant study design    |
| [256] <a href="https://clinicaltrials.gov/ct2/show/NCT01576172">https://clinicaltrials.gov/ct2/show/NCT01576172</a>                                                                                                                                                                                               | Not relevant study design    |
| [257] <a href="https://clinicaltrials.gov/ct2/show/NCT02601014">https://clinicaltrials.gov/ct2/show/NCT02601014</a>                                                                                                                                                                                               | Not relevant study design    |
| [258] <a href="https://clinicaltrials.gov/ct2/show/NCT02125357">https://clinicaltrials.gov/ct2/show/NCT02125357</a>                                                                                                                                                                                               | Not relevant study design    |
| [259] Antonarakis ES, Lu C, Luber B, Liang C, Wang H, Chen Y, et al. Germline DNA-repair gene mutations and outcomes in men with metastatic castration-resistant prostate cancer receiving first-line abiraterone and enzalutamide. <i>Eur Urol</i> 2018.                                                         | Not relevant study design    |
| [260] <a href="https://clinicaltrials.gov/ct2/show/NCT02358200">https://clinicaltrials.gov/ct2/show/NCT02358200</a>                                                                                                                                                                                               | Not relevant study design    |
| [261] Maha H, Daignault-Newton S, Twardowski P, Albany C, Stein M, Kunju L, et al. Targeting androgen receptor                                                                                                                                                                                                    | Not relevant study           |

|                                                                                                                                                                                                                                                                                                                                      |                           |
|--------------------------------------------------------------------------------------------------------------------------------------------------------------------------------------------------------------------------------------------------------------------------------------------------------------------------------------|---------------------------|
| and DNA repair in metastatic castration-resistant prostate cancer: results from NCI 9012. <i>J Clin Oncol</i> 2018;36(10):991-999.                                                                                                                                                                                                   | design                    |
| [262] Hall EJ, Schiff PB, Hanks GE, Brenner DJ, Russo J, Chen J, et al. A preliminary report: frequency of A-T heterozygotes among prostate cancer patients with severe late responses to radiation therapy. <i>Cancer J Sci Am</i> 1998;4(6):385-389.                                                                               | Not a relevant population |
| [263] Cyrta J, Mosquera JM, Robinson B, Sboner A, Beltran H, Hovelson D, et al. Integrative genomics of prostate cancer progression. <i>Lab Invest</i> 2017.                                                                                                                                                                         | No relevant outcome       |
| [264] Usmani N, Leong N, Martell K, Lan L, Ghosh S, Pervez N, et al. Single-nucleotide polymorphisms studied for associations with urinary toxicity from (125)I prostate brachytherapy implants. <i>Brachytherapy</i> 2014;13(3):285-291.                                                                                            | No relevant outcome       |
| [265] Na R, Lilly S, Han M, Hongjie Y, Deke J, Shah S, et al. Germline mutations in DNA repair genes are significantly enriched in lethal prostate cancer and are associated with disease survival (MP57-01). Presented at the American Urological Association Annual Meeting; 14 May 2017. <i>J Urol</i> 2017;197, No. 4S(4S):e763. | Duplicate                 |

### C. Records excluded (not countries of interest).

| Title                                                                                                                                                                                                   | Country |
|---------------------------------------------------------------------------------------------------------------------------------------------------------------------------------------------------------|---------|
| [1] Ding GF, Xu YF, Yang ZS, Ding YL, Fang HF, Zhao HP. Coexpression of the mutated BRCA1 mRNA and p53 mRNA and its association in Chinese prostate cancer. <i>Urol Oncol</i> 2011;29(2):145-149.       | China   |
| [2] Dong X, Wang L, Taniguchi K, Wang X, Cunningham JM, McDonnell SK, et al. Mutations in CHEK2 associated with prostate cancer risk. <i>Am J Hum Genet</i> 2003;72(2):270-280.                         |         |
| [3] Fredriksson H, Ikonen T, Autio V, Matikainen MP, Helin HJ, Tammela TL, et al. Identification of germline MLH1 alterations in familial prostate cancer. <i>Eur J Cancer</i> 2006;42(16):2802-2806.   | Finland |
| [4] Pelttari LM, Nurminen R, Gylfe A, Aaltonen LA, Schleutker J, Nevanlinna H. Screening of Finnish RAD51C founder mutations in prostate and colorectal cancer patients. <i>BMC Cancer</i> 2012;12:552. |         |
| [5] Seppala EH, Ikonen T, Mononen N, Autio V, Rokman A, Matikainen MP, et al. CHEK2 variants associate with hereditary prostate cancer. <i>Br J Cancer</i> 2003;89(10):1966-1970.                       |         |
| [6] Sigurdsson S, Thorlacius S, Tomasson J, Tryggvadottir L, Benediktsdottir K, Eyfjord JE, et al. BRCA2 mutation in Icelandic prostate cancer patients. <i>J Mol Med</i> 1997;75(10):758-761.          | Iceland |
| [7] Tryggvadottir L, Vidarsdottir L, Thorgeirsson T, Jonasson JG, Olafsdottir EJ, Olafsdottir GH, et al.                                                                                                |         |



|                                                                                                                                                                                                                                                                                                                               |        |
|-------------------------------------------------------------------------------------------------------------------------------------------------------------------------------------------------------------------------------------------------------------------------------------------------------------------------------|--------|
| Prostate cancer progression and survival in BRCA2 mutation carriers. <i>J Natl Cancer Inst</i> 2007;99(12):929-935.                                                                                                                                                                                                           |        |
| [8] Soni A, Bansal A, Singh LC, Mishra AK, Majumdar M, Regina T, et al. Gene expression profile and mutational analysis of DNA mismatch repair genes in carcinoma prostate in Indian population. <i>OMICS J Integr Biol</i> 2011;15(5):319-324.                                                                               | India  |
| [9] Abele A, Vjaters E, Irmejs A, Trofimovics G, Miklasevics E, Gardovskis J. Epidemiologic, clinical, and molecular characteristics of hereditary prostate cancer in Latvia. <i>Medicina (Kaunas, Lithuania)</i> 2011;47(10):579-585.                                                                                        | Latvia |
| [10] Knappskog S, Leirvaag B, Gansmo LB, Romundstad P, Hveem K, Vatten L, et al. Prevalence of the CHEK2 R95* germline mutation. <i>Hered Cancer Clin Pract</i> 2016;14:19.                                                                                                                                                   | Norway |
| [11] Antczak A, Stawicka M, Izycki D, Godlewski D, Cybulski C, Milecki P, et al. Relation between mutations in prostate cancer and familial history of cancer predisposing genes with the age of prostate cancer patients at the time of diagnosis - Impact on screening indications. <i>J Urol</i> 2009;181(4 SUPPL. 1):657. | Poland |
| [12] Cybulski C, Gorski B, Huzarski T, Masojc B, Mierzejewski M, Debniak T, et al. CHEK2 is a multiorgan cancer susceptibility gene. <i>Am J Hum Genet</i> 2004;75(6):1131-1135.                                                                                                                                              |        |
| [13] Cybulski C, Gorski B, Debniak T, Gliniewicz B, Mierzejewski M, Masojc B, et al. NBS1 is a prostate cancer susceptibility gene. <i>Cancer Res</i> 2004;64(4):1215-1219.                                                                                                                                                   |        |
| [14] Gronwald J, Cybulski C, Piesiak W, Suchy J, Huzarski T, Byrski T, et al. Cancer risks in first-degree relatives of CHEK2 mutation carriers: effects of mutation type and cancer site in proband. <i>Br J Cancer</i> 2009;100(9):1508-1512.                                                                               |        |
| [15] Cybulski C, Wokolorczyk D, Kluzniak W, Jakubowska A, Gorski B, Gronwald J, et al. An inherited NBN mutation is associated with poor prognosis prostate cancer. <i>Br J Cancer</i> 2013;108(2):461-468.                                                                                                                   |        |
| [16] Cybulski C, Wokolorczyk D, Huzarski T, Byrski T, Gronwald J, Gorski B, et al. A large germline deletion in the Chek2 kinase gene is associated with an increased risk of prostate cancer. <i>J Med Genet</i> 2006;43(11):863-866.                                                                                        |        |
| [17] Cybulski C, Huzarski T, Gorski B, Masojc B, Mierzejewski M, Debniak T, et al. A novel founder CHEK2 mutation is associated with increased prostate cancer risk. <i>Cancer Res</i> 2004;64(8):2677-2679.                                                                                                                  |        |
| [18] Cybulski C, Gorski B, Gronwald J, Huzarski T, Byrski T, Debniak T, et al. BRCA1 mutations and prostate cancer in Poland. <i>Eur J Cancer Prev</i> 2008;17(1):62-66.                                                                                                                                                      |        |

|                                                                                                                                                                                                                            |        |
|----------------------------------------------------------------------------------------------------------------------------------------------------------------------------------------------------------------------------|--------|
| [19] Wagenius M, Borg A, Johansson L, Giwercman A, Bratt O. CHEK2*1100delC is not an important high-risk gene in families with hereditary prostate cancer in southern Sweden. Scand J Urol Nephrol 2006;40(1):23-25.       | Sweden |
| [20] Manguoglu E, Guran S, Yamac D, Colak T, Simsek M, Baykara M, et al. Germline mutations of BRCA1 and BRCA2 genes in Turkish breast, ovarian, and prostate cancer patients. Cancer Genet Cytogenet 2010;203(2):230-237. | Turkey |

## Appendix S4.

### Table of Contents for Appendix S4.

| Location | Subgroup                        | Description of Data                                                                                                                         |
|----------|---------------------------------|---------------------------------------------------------------------------------------------------------------------------------------------|
| A1       | Familial PC                     | Summary of <i>BRCA2</i> or DDR gene mutation prevalence in familial prostate cancer germline tissues                                        |
| B1       | Familial PC                     | Reported prevalence for familial <i>BRCA2</i> and DNA damage response mutations in germline prostate cancer populations                     |
| C1       | Familial PC                     | Reported prevalence for familial <i>BRCA2</i> and DDR mutations in germline PC populations (definitions of familial and inclusion criteria) |
| A2       | Familial PC                     | Familial germline mutations in patients with prostate cancer                                                                                |
| B2       | Ashkenazi Jewish                | DDR mutations in Ashkenazi Jewish patients with prostate cancer                                                                             |
| C2       | Pre-specified treatment regimen | DDR mutations in patients receiving a pre-specified treatment regimen                                                                       |
| D2       | Young-onset PC                  | DDR mutations in patients with young-onset PC                                                                                               |
| E2       | African-American                | DDR mutations in African-American patients                                                                                                  |
| F2       | Lethal PC                       | DDR mutations in patients with lethal PC                                                                                                    |

#### A1. Summary of *BRCA2* and DDR gene mutation prevalence in familial prostate cancer germline tissues.

| % period prevalence, median (range) | Prostate cancer                                               |
|-------------------------------------|---------------------------------------------------------------|
| Specific <i>BRCA2</i>               | 0.5 (0.21, 2.63)<br>3 studies (n=703)<br>12 datasets (n=3248) |
| All <i>BRCA2</i>                    | 3.7 (1.3, 7.9)<br>6 studies (n=945)                           |

|                                                                                                                                                                                                                       |                                                              |
|-----------------------------------------------------------------------------------------------------------------------------------------------------------------------------------------------------------------------|--------------------------------------------------------------|
| DDR <sup>a</sup>                                                                                                                                                                                                      | 29.3 (7.3, 91.67)<br>3 studies (n=327)<br>4 datasets (n=339) |
| <sup>a</sup> DDR=multiple gene definitions for DNA damage response gene that includes at least one of our genes of interest. <i>BRCA</i> , breast cancer susceptibility gene; DDR, DNA damage repair; n, sample size. |                                                              |

### B1. Reported prevalence for familial *BRCA2* and DNA damage response mutations in germline prostate cancer populations.

| Gene                  | DDR definition                                     | % prevalence | N   | Variant described as pathogenic for PC? | Variant described as pathogenic for other cancers? | Variant shown to be associated with PC or risk to PC? | Country | Author, year                       | References |
|-----------------------|----------------------------------------------------|--------------|-----|-----------------------------------------|----------------------------------------------------|-------------------------------------------------------|---------|------------------------------------|------------|
| Specific <i>BRCA2</i> | <i>BRCA2</i> (5531delTT)                           | 2.63         | 38  | Yes                                     | Yes                                                | Yes                                                   | UK      | Gayther <i>et al</i> , 2000        | (50)       |
|                       | <i>BRCA2</i> (6710delACAA)                         | 2.63         | 38  | Yes                                     | Yes                                                | Yes                                                   | UK      | Gayther <i>et al</i> , 2000        | (50)       |
|                       | <i>BRCA2</i> (9078 G>T or K2950N)                  | 2.63         | 38  | No                                      | Yes                                                | Yes                                                   | UK      | Gayther <i>et al</i> , 2000        | (50)       |
|                       | <i>BRCA2</i> (c.1813_14_insA or I605fs) frameshift | 0.21         | 474 | Yes                                     | Yes                                                | Yes                                                   | Germany | Maier <i>et al</i> , 2014          | (72)       |
|                       | <i>BRCA2</i> (c.3847delGT or V128fs) frameshift    | 0.21         | 474 | Yes                                     | Yes                                                | Yes                                                   | Germany | Maier <i>et al</i> , 2014          | (72)       |
|                       | <i>BRCA2</i> (c.4449delA or T1483fs) frameshift    | 0.21         | 474 | Yes                                     | Yes                                                | Yes                                                   | Germany | Maier <i>et al</i> , 2014          | (72)       |
|                       | <i>BRCA2</i> (c.6037A>T or K2013X) nonsense        | 0.21         | 474 | Yes                                     | Yes                                                | Yes                                                   | Germany | Maier <i>et al</i> , 2014          | (72)       |
|                       | <i>BRCA2</i> (c.7495C>T or Q2499X) nonsense        | 0.21         | 474 | Yes                                     | Yes                                                | Yes                                                   | Germany | Maier <i>et al</i> , 2014          | (72)       |
|                       | <i>BRCA2</i> c.4876_4877del: p.(Asn1626Serfs*12)   | 0.52         | 191 | Yes                                     | Unclear                                            | Yes                                                   | UK      | Leongamornlert <i>et al</i> , 2014 | (70)       |

|                     |                                                                                                                                                                           |      |     |     |         |     |         |                                       |      |
|---------------------|---------------------------------------------------------------------------------------------------------------------------------------------------------------------------|------|-----|-----|---------|-----|---------|---------------------------------------|------|
|                     | <i>BRCA2</i> c.4981del:p.<br>(Tyr1661Ilefs*9)                                                                                                                             | 0.52 | 191 | Yes | Unclear | Yes | UK      | Leongamornlert<br><i>et al</i> , 2014 | (70) |
|                     | <i>BRCA2</i> c.5909C>A:<br>p.(Ser1970*)                                                                                                                                   | 0.52 | 191 | Yes | Unclear | Yes | UK      | Leongamornlert<br><i>et al</i> , 2014 | (70) |
|                     | <i>BRCA2</i> c.9382C>T:<br>p.(Arg3128*)                                                                                                                                   | 0.52 | 191 | Yes | Unclear | Yes | UK      | Leongamornlert<br><i>et al</i> , 2014 | (70) |
| All<br><i>BRCA2</i> | <i>BRCA2</i>                                                                                                                                                              | 3.23 | 124 | NA  | NA      | NA  | USA     | Ledet <i>et al</i> ,<br>2017          | (67) |
|                     | <i>BRCA2</i> exon sequence<br>variants                                                                                                                                    | 1.3  | 382 | NA  | NA      | NA  | Germany | Maier <i>et al</i> ,<br>2014          | (72) |
|                     | Five <i>BRCA2</i> variants<br>(L61P, H1458R,<br>G2508S, H3056Y, and<br>R3384X)                                                                                            | 4.24 | 118 | NA  | NA      | NA  | Japan   | Hayano <i>et al</i> ,<br>2016         | (57) |
|                     | Total undefined <i>BRCA2</i><br>variants                                                                                                                                  | 7.9  | 38  | NA  | NA      | NA  | UK      | Gayther <i>et al</i> ,<br>2000        | (50) |
|                     | Undefined <i>BRCA2</i>                                                                                                                                                    | 4.35 | 92  | NA  | NA      | NA  | USA     | Marshall <i>et al</i> ,<br>2017       | (74) |
|                     | All <i>BRCA2</i> (c.9382C>T:<br>p.(Arg3128*);<br>c.4876_4877del:<br>p.(Asn1626Serfs*12);<br>c.4981del:p.(Tyr1661Ilef<br>s*9); <i>BRCA2</i><br>c.5909C>A:<br>p.(Ser1970*)) | 2.09 | 191 | NA  | NA      | NA  | UK      | Leongamornlert<br><i>et al</i> , 2014 | (70) |
| DDR                 | DDR (25-79 cancer-<br>related genes)                                                                                                                                      | 16.9 | 124 | NA  | NA      | NA  | USA     | Ledet <i>et al</i> ,<br>2017          | (67) |
|                     | Deleterious LoF<br>mutations                                                                                                                                              | 7.3  | 191 | NA  | NA      | NA  | UK      | Leongamornlert<br><i>et al</i> , 2014 | (70) |

|  |                                                                                                                                       |       |    |    |    |    |     |                             |      |
|--|---------------------------------------------------------------------------------------------------------------------------------------|-------|----|----|----|----|-----|-----------------------------|------|
|  | One affected gene; High value DDR or androgen signalling pathway gene variants that may contribute to familial prostate risk          | 91.67 | 12 | NA | NA | NA | USA | Nicolas <i>et al</i> , 2015 | (24) |
|  | Two or more affected genes: High value DDR or androgen signalling pathway gene variants that may contribute to familial prostate risk | 41.67 | 12 | NA | NA | NA | USA | Nicolas <i>et al</i> , 2015 | (24) |

*BRCA*, breast cancer susceptibility gene; DDR, DNA damage repair; LoF, loss of function; NA, not available; PC, prostate cancer.

**C1. Reported prevalence for familial *BRCA2* and DDR mutations in germline PC populations (definitions of familial and inclusion criteria).**

| Gene                  | DDR definition                                     | % prevalence | N   | Definition of familial cancer | Inclusion criteria                                                                                                                                                                             | Author, year                | References |
|-----------------------|----------------------------------------------------|--------------|-----|-------------------------------|------------------------------------------------------------------------------------------------------------------------------------------------------------------------------------------------|-----------------------------|------------|
| Specific <i>BRCA2</i> | <i>BRCA2</i> (5531delTT)                           | 2.63         | 38  | NR                            | Clusters with a relative risk of developing prostate cancer of $\geq 4$ ; clusters of $\geq 3$ prostate cancers at any age or in sibling pairs, preferably where one is <65 years at diagnosis | Gayther <i>et al</i> , 2000 | (50)       |
|                       | <i>BRCA2</i> (6710delACAA)                         | 2.63         | 38  |                               |                                                                                                                                                                                                |                             |            |
|                       | <i>BRCA2</i> (9078 G>T or K2950N)                  | 2.63         | 38  |                               |                                                                                                                                                                                                |                             |            |
|                       | <i>BRCA2</i> (c.1813_14_insA or I605fs) frameshift | 0.21         | 474 | NR                            | Patients with familial PC who are members of families with PC clustering; or patients with sporadic early onset PC who underwent radical                                                       | Maier <i>et al</i> , 2014   | (72)       |
|                       | <i>BRCA2</i> (c.3847delGT or V128fs) frameshift    | 0.21         | 474 |                               |                                                                                                                                                                                                |                             |            |

|                  |                                                                       |      |     |                                                                                |                                                                           |                                    |      |
|------------------|-----------------------------------------------------------------------|------|-----|--------------------------------------------------------------------------------|---------------------------------------------------------------------------|------------------------------------|------|
|                  | <i>BRCA2</i> (c.4449delA or T1483fs) frameshift                       | 0.21 | 474 |                                                                                | prostatectomy and reported a negative family history for prostate cancer  |                                    |      |
|                  | <i>BRCA2</i> (c.6037A>T or K2013X) nonsense                           | 0.21 | 474 |                                                                                |                                                                           |                                    |      |
|                  | <i>BRCA2</i> (c.7495C>T or Q2499X) nonsense                           | 0.21 | 474 |                                                                                |                                                                           |                                    |      |
|                  | <i>BRCA2</i> c.4876_4877del:p.(Asn1626Serfs*12)                       | 0.52 | 191 | Two or more relatives affected by PC                                           | Men with PC who had two or more relatives affected by PC                  | Leongamornlert <i>et al</i> , 2014 | (70) |
|                  | <i>BRCA2</i> c.4981del:p.(Tyr1661Ilefs*9)                             | 0.52 | 191 |                                                                                |                                                                           |                                    |      |
|                  | <i>BRCA2</i> c.5909C>A:p.(Ser1970*)                                   | 0.52 | 191 |                                                                                |                                                                           |                                    |      |
|                  | <i>BRCA2</i> c.9382C>T:p.(Arg3128*)                                   | 0.52 | 191 |                                                                                |                                                                           |                                    |      |
| All <i>BRCA2</i> | <i>BRCA2</i>                                                          | 3.23 | 124 | PC patients with a family history that met NCCN guidelines for genetic testing | Patients with prostate cancer who met NCCN guidelines for genetic testing | Ledet <i>et al</i> , 2017          | (67) |
|                  | <i>BRCA2</i> exon sequence variants                                   | 1.3  | 382 | NR                                                                             | See above                                                                 | Maier <i>et al</i> , 2014          | (72) |
|                  | Five <i>BRCA2</i> variants (L61P, H1458R, G2508S, H3056Y, and R3384X) | 4.24 | 118 | Small PC families (2 patients with PC; n=118)                                  | Patients in families with two or more prostate cancer patients            | Hayano <i>et al</i> , 2016         | (57) |
|                  | Total undefined <i>BRCA2</i> variants                                 | 7.9  | 38  | NR                                                                             | See above                                                                 | Gayther <i>et al</i> , 2000        | (50) |

|     |                                                                                                                                                     |       |     |                                                                                                                                           |                                                                                                                                                                                            |                                    |      |
|-----|-----------------------------------------------------------------------------------------------------------------------------------------------------|-------|-----|-------------------------------------------------------------------------------------------------------------------------------------------|--------------------------------------------------------------------------------------------------------------------------------------------------------------------------------------------|------------------------------------|------|
|     | Undefined <i>BRCA2</i>                                                                                                                              | 4.35  | 92  | Personal history of PC and $\geq 1$ close blood relative with breast, ovarian, pancreatic or prostate cancer; or a personal history of PC | Men with PC; personal history of PC and $\geq 1$ close blood relative with breast, ovarian, pancreatic or prostate cancer; or a personal history of PC; underwent hereditary panel testing | Marshall <i>et al</i> , 2017       | (74) |
|     | All <i>BRCA2</i> (c.9382C>T: p.(Arg3128*); c.4876_4877del: p.(Asn1626Serfs*12); c.4981del:p.(Tyr1661Ilefs*9); <i>BRCA2</i> c.5909C>A: p.(Ser1970*)) | 2.09  | 191 | Two or more relatives affected by PC                                                                                                      | Men with PC who had two or more relatives affected by PC                                                                                                                                   | Leongamornlert <i>et al</i> , 2014 | (70) |
| DDR | DDR (25-79 cancer-related genes)                                                                                                                    | 16.9  | 124 | PC patients with a family history that met NCCN guidelines for genetic testing                                                            | Patients with prostate cancer who met NCCN guidelines for genetic testing                                                                                                                  | Ledet <i>et al</i> , 2017          | (67) |
|     | Deleterious LoF mutations                                                                                                                           | 7.3   | 191 | Two or more relatives affected by PC                                                                                                      | Men with PC who had two or more relatives affected by PC                                                                                                                                   | Leongamornlert <i>et al</i> , 2014 | (70) |
|     | One affected gene; High value DDR or androgen signalling pathway gene variants that may contribute to familial prostate risk                        | 91.67 | 12  | NR                                                                                                                                        | Strong family cancer history with either multiple first-degree or second-degree relatives with prostate cancer or other cancers                                                            | Nicolas <i>et al</i> , 2015        | (24) |
|     | Two or more affected genes: High value DDR or androgen signalling pathway gene variants that may contribute to familial prostate risk               | 41.67 | 12  |                                                                                                                                           |                                                                                                                                                                                            |                                    |      |



*BRCA*, breast cancer susceptibility gene; DDR, DNA damage repair; LoF, loss of function; NCCN, National Comprehensive Cancer Network; NR, not reported; PC, prostate cancer.

## A2. Familial germline mutations in patients with prostate cancer.

| Country        | Gene                                | DDR definition                                                        | % prevalence     | n         | Period of data collection | Author, year                                                     | References    |
|----------------|-------------------------------------|-----------------------------------------------------------------------|------------------|-----------|---------------------------|------------------------------------------------------------------|---------------|
| Australia      | <i>BRCA1</i>                        | Undefined (unclear germline or somatic)                               | 7.5              | 147       | NR                        | Cheng <i>et al</i> , 2011                                        | (23)          |
|                | <i>BRCA2</i>                        | Undefined (unclear germline or somatic)                               | 26.5             | 147       | NR                        |                                                                  |               |
| Germany        | <i>BRCA2</i>                        | <i>BRCA2</i> (c.1813_14_insA or I605fs) frameshift <sup>a</sup>       | 0.2 <sup>c</sup> | 474       | 1998-2007                 | Maier <i>et al</i> , 2014<br>(Linked: Maier <i>et al</i> , 2010) | (72)<br>(107) |
|                |                                     | <i>BRCA2</i> (c.3847delGT or V128fs) frameshift <sup>a</sup>          | 0.2 <sup>c</sup> | 474       | 1998-2007                 |                                                                  |               |
|                |                                     | <i>BRCA2</i> (c.4449delA or T1483fs) frameshift <sup>a</sup>          | 0.2 <sup>c</sup> | 474       | 1998-2007                 |                                                                  |               |
|                |                                     | <i>BRCA2</i> (c.6037A>T or K2013X) nonsense <sup>a</sup>              | 0.2 <sup>c</sup> | 474       | 1998-2007                 |                                                                  |               |
|                |                                     | <i>BRCA2</i> (c.7495C>T or Q2499X) nonsense <sup>a</sup>              | 0.2 <sup>c</sup> | 474       | 1998-2007                 |                                                                  |               |
|                | <i>BRCA2</i> exon sequence variants | 1.3 <sup>c</sup>                                                      | 382              | 1998-2007 |                           |                                                                  |               |
|                | <i>NBN</i>                          | <i>NBN</i> 657del5 <sup>a</sup>                                       | 0.0              | 299       | NR                        | Hebbring <i>et al</i> , 2006                                     | (58)          |
| Japan          | <i>BRCA2</i>                        | Five <i>BRCA2</i> variants (L61P, H1458R, G2508S, H3056Y, and R3384X) | 4.2 <sup>b</sup> | 118       | NR                        | Hayano <i>et al</i> , 2016                                       | (57)          |
| Multi-national | <i>NBN</i>                          | <i>NBN</i> 657del5 <sup>a</sup>                                       | 0.2              | 1819      | NR                        | Hebbring <i>et al</i> , 2006                                     | (58)          |
| UK             | <i>ATM</i>                          | <i>ATM</i> c.7327C>T:p.(Arg2443*) <sup>a</sup>                        | 0.5              | 191       | NR                        | Leongamornlert <i>et al</i> , 2014                               | (70)          |
|                |                                     | <i>ATM</i> c.7777C>T: p.(Gln2593*) <sup>a</sup>                       | 0.5              | 191       | NR                        |                                                                  |               |
|                |                                     | All <i>ATM</i> (c.7777C>T: p.(Gln2593*); c.7327C>T:p.(Arg2443*))      | 1.0              | 191       | NR                        |                                                                  |               |
|                | <i>BRCA1</i>                        | Total undefined <i>BRCA1</i> variants                                 | 0.0              | 38        | NR                        | Gayther <i>et al</i> , 2000                                      | (50)          |

|               |                                                                                                                                                     |     |     |    |                                    |      |
|---------------|-----------------------------------------------------------------------------------------------------------------------------------------------------|-----|-----|----|------------------------------------|------|
|               | All <i>BRCA1</i> (c.4065_4068del: p.(Asn1355Lysfsa10))                                                                                              | 0.5 | 191 | NR | Leongamornlert <i>et al</i> , 2014 | (70) |
| <i>BRCA2</i>  | <i>BRCA2</i> (5531delTT) <sup>a</sup>                                                                                                               | 2.6 | 38  | NR | Gayther <i>et al</i> , 2000        | (50) |
|               | <i>BRCA2</i> (6710delACAA) <sup>a</sup>                                                                                                             | 2.6 | 38  | NR |                                    |      |
|               | <i>BRCA2</i> (9078 G>T or K2950N) <sup>a</sup>                                                                                                      | 2.6 | 38  | NR |                                    |      |
|               | <i>BRCA2</i> c.4876_4877del: p.(Asn1626Serfs*12) <sup>a</sup>                                                                                       | 0.5 | 191 | NR | Leongamornlert <i>et al</i> , 2014 | (70) |
|               | <i>BRCA2</i> c.4981del:p.(Tyr1661Ilefs*9) <sup>a</sup>                                                                                              | 0.5 | 191 | NR |                                    |      |
|               | <i>BRCA2</i> c.5909C>A: p.(Ser1970*) <sup>a</sup>                                                                                                   | 0.5 | 191 | NR |                                    |      |
|               | <i>BRCA2</i> c.9382C>T: p.(Arg3128*) <sup>a</sup>                                                                                                   | 0.5 | 191 | NR |                                    |      |
|               | Total undefined <i>BRCA2</i> variants                                                                                                               | 7.9 | 38  | NR | Gayther <i>et al</i> , 2000        | (50) |
|               | All <i>BRCA2</i> (c.9382C>T: p.(Arg3128*); c.4876_4877del: p.(Asn1626Serfs*12); c.4981del:p.(Tyr1661Ilefs*9); <i>BRCA2</i> c.5909C>A: p.(Ser1970*)) | 2.1 | 191 | NR | Leongamornlert <i>et al</i> , 2014 | (70) |
| <i>CHEK2</i>  | <i>CHEK2</i> c.1263del:p.(Ser422Valfs*15) <sup>a</sup>                                                                                              | 0.5 | 191 | NR |                                    |      |
|               | <i>CHEK2</i> c.869del:p.(Asn290Thrfs*14) <sup>a</sup>                                                                                               | 0.5 | 191 | NR |                                    |      |
|               | All ( <i>CHEK2</i> c.869del:p.(Asn290Thrfs*14); c.1263del:p.(Ser422Valfs*15))                                                                       | 1.0 | 191 | NR |                                    |      |
| <i>MLH1</i>   | NA (no mutations identified)                                                                                                                        | 0.0 | 191 | NR |                                    |      |
| <i>MRE11A</i> | NA (no mutations identified)                                                                                                                        | 0.0 | 191 | NR |                                    |      |
| <i>NBN</i>    | NA (no mutations identified)                                                                                                                        | 0.0 | 191 | NR |                                    |      |
| <i>PALB2</i>  | All <i>PALB2</i> (c.3507_3508del:p.(His1170Phefs*19))                                                                                               | 0.5 | 191 | NR |                                    |      |
| <i>RAD51C</i> | NA (no mutations identified)                                                                                                                        | 0.0 | 191 | NR |                                    |      |
| DDR           | Deleterious LoF mutations                                                                                                                           | 7.3 | 191 | NR |                                    |      |

|     |              |                        |                                 |      |              |                                                                |                              |       |
|-----|--------------|------------------------|---------------------------------|------|--------------|----------------------------------------------------------------|------------------------------|-------|
| USA | <i>ATM</i>   | Undefined <i>ATM</i>   | 1.6 <sup>c</sup>                | 124  | 2015 to 2016 | Ledet <i>et al</i> , 2017<br>(linked: Lin <i>et al</i> , 2017) | (67)<br>(108)                |       |
|     |              |                        | 2.1 <sup>b</sup>                | NR   | NR           | LaDuca <i>et al</i> , 2017                                     | (65)                         |       |
|     |              |                        | 3.3                             | 92   | NR           | Marshall <i>et al</i> , 2017                                   | (74)                         |       |
|     | <i>BRCA1</i> | Undefined <i>BRCA1</i> | 2.4 <sup>c</sup>                | 124  | 2015 to 2016 | Ledet <i>et al</i> , 2017<br>(linked: Lin <i>et al</i> , 2017) | (67)<br>(108)                |       |
|     |              |                        | 1.1                             | 92   | NR           | Marshall <i>et al</i> , 2017                                   | (74)                         |       |
|     | <i>BRCA2</i> | Undefined <i>BRCA2</i> | 3.2 <sup>c</sup>                | 124  | 2015 to 2016 | Ledet <i>et al</i> , 2017<br>(linked: Lin <i>et al</i> , 2017) | (67)<br>(108)                |       |
|     |              |                        | 4.3                             | 92   | NR           | Marshall <i>et al</i> , 2017                                   | (74)                         |       |
|     | <i>CHEK2</i> | Undefined <i>CHEK2</i> | 2.4 <sup>c</sup>                | 124  | 2015 to 2016 | Ledet <i>et al</i> , 2017<br>(linked: Lin <i>et al</i> , 2017) | (67)<br>(108)                |       |
|     |              |                        | 2.2                             | 92   | NR           | Marshall <i>et al</i> , 2017                                   | (74)                         |       |
|     | <i>NBN</i>   | <i>NBN</i>             | 0.8 <sup>c</sup>                | 124  | 2015 to 2016 | Ledet <i>et al</i> , 2017<br>(linked: Lin <i>et al</i> , 2017) | (67)<br>(108)                |       |
|     |              |                        | <i>NBN</i> 657del5 <sup>a</sup> | 0.3  | 1520         | NR                                                             | Hebbring <i>et al</i> , 2006 | (58)  |
|     |              |                        | novel S706* G>C                 | 1.2  | 85           | NR                                                             | Zuhlke <i>et al</i> , 2012   | (102) |
|     |              |                        | rs1805794 C>G E185Q             | 54.1 | 85           | NR                                                             |                              |       |

|  |     |                                  |      |     |              |                                                                |               |
|--|-----|----------------------------------|------|-----|--------------|----------------------------------------------------------------|---------------|
|  | DDR | DDR (25-79 cancer-related genes) | 16.9 | 124 | 2015 to 2016 | Ledet <i>et al</i> , 2017<br>(linked: Lin <i>et al</i> , 2017) | (67)<br>(108) |
|--|-----|----------------------------------|------|-----|--------------|----------------------------------------------------------------|---------------|

<sup>a</sup>Analysis for a specific mutation (not all mutations for a given gene), these studies were not highlighted in grey; <sup>b</sup>high risk of bias for country representation and statistical analysis; <sup>c</sup>high risk of bias for country representation.  
Note all patients are designated ‘PC’ and all mutations are germline (except Cheng 2011 which has unclear germline or somatic designation).  
*ATM*, ataxia telangiectasia mutated; *BRCA*, breast cancer susceptibility gene; *CHEK2*, checkpoint kinase 2; DDR, DNA damage repair; LoF, loss of function; *MLH1*, mutL homolog 1; *MRE11A*, *MRE11* homolog A, double-strand break repair nuclease; NA, not applicable; *NBN*, nibrin; NR, not reported; *PALB2*, partner and localizer of *BRCA2*; PC, prostate cancer; RAD, DNA repair protein.

## B2. DDR mutations in Ashkenazi Jewish patients with prostate cancer.

| Country | Germline or somatic mutation | Prostate cancer group | Gene         | DDR definition                        | % prevalence                          | n                | Period of data collection | Author, year                    | References |              |
|---------|------------------------------|-----------------------|--------------|---------------------------------------|---------------------------------------|------------------|---------------------------|---------------------------------|------------|--------------|
| Canada  | Germline                     | PC                    | <i>BRCA1</i> | <i>BRCA1</i> (185delAG)* <sup>a</sup> | 0.0 <sup>c</sup>                      | 146              | 1991 to 2002              | Hamel <i>et al</i> , 2003       | (55)       |              |
|         |                              |                       |              | <i>BRCA2</i>                          | <i>BRCA1</i> (5382insC)* <sup>a</sup> | 0.0 <sup>c</sup> | 146                       |                                 |            | 1991 to 2002 |
|         |                              |                       |              |                                       | <i>BRCA2</i> (6174delT)* <sup>a</sup> | 1.4 <sup>c</sup> | 146                       |                                 |            | 1991 to 2002 |
|         |                              |                       | <i>CHEK2</i> | <i>CHEK2</i> exon 10 1180G>A E394F    | 0.0 <sup>c</sup>                      | 136              | NR                        | Tischkowitz <i>et al</i> , 2008 | (97)       |              |
|         |                              |                       |              | <i>CHEK2</i> exon 11 1270T>C Y424H    | 0.0 <sup>c</sup>                      | 136              | NR                        |                                 |            |              |
|         |                              |                       |              | <i>CHEK2</i> exon 11 1283C>T S428F    | 2.8 <sup>c</sup>                      | 141              | NR                        |                                 |            |              |
|         |                              |                       |              | <i>CHEK2</i> exon 11 1312G>T D438Y    | 0.7 <sup>c</sup>                      | 143              | NR                        |                                 |            |              |
| Israel  | Germline                     | PC                    | <i>BRCA1</i> | <i>BRCA1</i> (185delAG) <sup>a</sup>  | 2.3 <sup>c</sup>                      | 87               | Jan 1991 to Jul 1997      | Hubert <i>et al</i> , 1999      | (59)       |              |
|         |                              |                       |              |                                       | 2.3 <sup>c</sup>                      | 87               | 1998                      | Vazina <i>et al</i> , 2000      | (98)       |              |
|         |                              |                       |              | <i>BRCA1</i> (5382insC) <sup>a</sup>  | 3.3 <sup>c</sup>                      | 60               | 1998                      |                                 |            |              |

|     |          |      |              |                                                        |                                      |                    |                      |                                                                          |                              |      |
|-----|----------|------|--------------|--------------------------------------------------------|--------------------------------------|--------------------|----------------------|--------------------------------------------------------------------------|------------------------------|------|
|     |          |      | <i>BRCA2</i> | <i>BRCA2</i> (6174delT) <sup>a</sup>                   | 1.1 <sup>c</sup>                     | 86                 | 1998                 |                                                                          |                              |      |
|     |          |      |              |                                                        | 1.1 <sup>c</sup>                     | 87                 | Jan 1991 to Jul 1997 | Hubert <i>et al</i> , 1999                                               | (59)                         |      |
|     |          |      | DDR          | <i>BRCA1</i> (185delAG) or <i>BRCA2</i> (6174delT)     | 3.4 <sup>c</sup>                     | 87                 | Jan 1991 to Jul 1997 |                                                                          |                              |      |
|     | Somatic  |      | <i>BRCA1</i> | <i>BRCA1</i> (185delAG) <sup>a</sup>                   | 1.5                                  | 940                | 1994 to 1995         | Giusti <i>et al</i> , 2003                                               | (51)                         |      |
|     |          |      |              | <i>BRCA1</i> (5382insC) <sup>a</sup>                   | 0.2                                  | 940                | 1994 to 1995         |                                                                          |                              |      |
|     |          |      |              | Total <i>BRCA1</i> [185delAG or 5382insC] <sup>a</sup> | 1.7                                  | 940                | 1994 to 1995         |                                                                          |                              |      |
|     |          |      | <i>BRCA2</i> | <i>BRCA2</i> (6174delT) <sup>a</sup>                   | 1.5                                  | 940                | 1994 to 1995         |                                                                          |                              |      |
| USA | Germline | CRPC | DDR          | <i>BRCA1</i> *185delAG and <i>BRCA2</i> *6174delT *    | 8.0                                  | 88                 | Jun 1998 to Dec 2007 | Gallagher <i>et al</i> , 2011<br>(Linked: Gallagher <i>et al</i> , 2010) | (48)<br>(49)                 |      |
|     |          |      | <i>BRCA1</i> | <i>BRCA1</i> *185delAG <sup>a</sup>                    | 3.4 <sup>c</sup>                     | 88                 | Jun 1998 to Dec 2007 |                                                                          |                              |      |
|     |          |      | <i>BRCA2</i> | <i>BRCA2</i> *6174delT <sup>a</sup>                    | 4.5 <sup>c</sup>                     | 88                 | Jun 1998 to Dec 2007 |                                                                          |                              |      |
|     |          | PC   |              | <i>BRCA1</i>                                           | 185delAG* <sup>a</sup>               | 0.0 <sup>c</sup>   | 60                   | NR                                                                       | Lehrer <i>et al</i> , 1998   | (68) |
|     |          |      |              |                                                        |                                      | 1.1                | 965                  | 1998 to 2005                                                             | Agalliu <i>et al</i> , 2009  | (32) |
|     |          |      |              |                                                        |                                      | 1.2 <sup>b,c</sup> | 83                   | 1991 to 1996                                                             | Nastiuk <i>et al</i> , 1999  | (78) |
|     |          |      |              |                                                        | 185delAG *and 5382incC* <sup>a</sup> | 2.0 <sup>c</sup>   | 251                  | Apr 2000 to Sep 2002                                                     | Kirchoff <i>et al</i> , 2004 | (63) |
|     |          |      |              |                                                        | 5382incC* <sup>a</sup>               | 0.1                | 975                  | 1998 to 2005                                                             | Agalliu <i>et al</i> , 2009  | (32) |
|     |          |      |              | <i>BRCA2</i>                                           | 6174delT* <sup>a</sup>               | 0.0 <sup>c</sup>   | 60                   | NR                                                                       | Lehrer <i>et al</i> , 1998   | (68) |

|  |  |                   |              |                                                   |                    |     |                      |                                                                          |              |
|--|--|-------------------|--------------|---------------------------------------------------|--------------------|-----|----------------------|--------------------------------------------------------------------------|--------------|
|  |  |                   |              |                                                   | 1.9                | 951 | 1998 to 2005         | Agalliu <i>et al</i> , 2009                                              | (32)         |
|  |  |                   |              |                                                   | 2.4 <sup>b,c</sup> | 82  | 1991 to 1996         | Nastiuk <i>et al</i> , 1999                                              | (78)         |
|  |  |                   |              |                                                   | 3.2 <sup>c</sup>   | 251 | Apr 2000 to Sep 2002 | Kirchoff <i>et al</i> , 2004                                             | (63)         |
|  |  | Other (localized) | DDR          | <i>BRCA1</i> *185delAG and <i>BRCA2</i> *6174delT | 3.1 <sup>c</sup>   | 832 | Jun 1998 to Dec 2007 | Gallagher <i>et al</i> , 2011<br>(Linked: Gallagher <i>et al</i> , 2010) | (48)<br>(49) |
|  |  |                   | <i>BRCA1</i> | <i>BRCA1</i> *185delAG                            | 0.7 <sup>c</sup>   | 832 | Jun 1998 to Dec 2007 |                                                                          |              |
|  |  |                   | <i>BRCA2</i> | <i>BRCA2</i> *6174delT                            | 2.4 <sup>c</sup>   | 832 | Jun 1998 to Dec 2007 |                                                                          |              |

<sup>a</sup>Analysis for a specific mutation (not all mutations for a given gene); <sup>b</sup>high risk of bias for country representation and statistical analysis; <sup>c</sup>high risk of bias for country representation.

Note only Tischkowitz 2008(97) analyzed all mutations for a given gene.

Agalliu 2009 (32) most representative of USA; Giusti 2003(51) most representative of Israel.

All mutations were reported as founder mutations (except Tishkowitz 2008).

*BRCA*, breast cancer susceptibility gene; *CHEK2*, checkpoint kinase 2; *CRPC*, castration-resistant PC; *DDR*, DNA damage repair; *NR*, not reported; *PC*, prostate cancer.

## C2. DDR mutations in patients receiving a pre-specified treatment regimen.

| Country | Germline or somatic mutation | Prostate cancer group | Gene         | DDR definition                                              | % prevalence | n   | Period of data collection | Author, year                    | References |
|---------|------------------------------|-----------------------|--------------|-------------------------------------------------------------|--------------|-----|---------------------------|---------------------------------|------------|
| Germany | Somatic                      | mCRPC                 | <i>BRCA1</i> | Undefined                                                   | 0.0          | 53  | 1998 and 2016             | Nientiedt <i>et al</i> , 2017   | (82)       |
|         |                              |                       | <i>BRCA2</i> | Deleterious, otherwise undefined                            | 15.1         | 53  | 1998 and 2016             |                                 |            |
| USA     | Germline                     |                       | <i>ATM</i>   | All <i>ATM</i> mutations (c.C4106A; c.5707dupA; c.6227delT) | 1.7          | 172 | Oct 2011 to Dec 2015      | Antonarakis <i>et al</i> , 2018 | (34)       |

|  |  |  |              |                                                                                                       |                  |     |                      |                                                   |               |
|--|--|--|--------------|-------------------------------------------------------------------------------------------------------|------------------|-----|----------------------|---------------------------------------------------|---------------|
|  |  |  |              | <i>ATM</i> (c.5707dupA) <sup>a</sup>                                                                  | 0.6              | 172 | Oct 2011 to Dec 2015 |                                                   |               |
|  |  |  |              | <i>ATM</i> (c.6227delT) <sup>a</sup>                                                                  | 0.6              | 172 | Oct 2011 to Dec 2015 |                                                   |               |
|  |  |  |              | <i>ATM</i> (c.C4106A) <sup>a</sup>                                                                    | 0.6              | 172 | Oct 2011 to Dec 2015 |                                                   |               |
|  |  |  |              | All pathogenic (c.7271T>G; p.Val2424Gly missense; c.3245_3247delinsTGAT; p.His1082LeufsX14 framshift) | 2.9              | 69  | Jun 2013 to Aug 2014 | Hart <i>et al</i> , 2016<br>(Linked: NCT01953640) | (56)<br>(109) |
|  |  |  |              | c.3245_3247delinsTGAT; p.His1082LeufsX14 framshift <sup>a</sup>                                       | 1.4              | 69  | Jun 2013 to Aug 2014 |                                                   |               |
|  |  |  |              | c.7271T>G; p.Val2424Gly missense <sup>a</sup>                                                         | 1.4              | 141 | Jun 2013 to Aug 2014 |                                                   |               |
|  |  |  |              | All <i>ATM</i> c.A>8266>T; p.K>2756>X                                                                 | 0.7 <sup>c</sup> | 69  | 2001 to 2015         | Pomerantz <i>et al</i> , 2017                     | (85)          |
|  |  |  | <i>ATR</i>   | All <i>ATR</i> c.4957C>T; p.Arg1653X Stop gained                                                      | 1.4              | 141 | Jun 2013 to Aug 2014 | Hart <i>et al</i> , 2016<br>(Linked: NCT01953640) | (56)<br>(109) |
|  |  |  |              | All <i>ATR</i> (c.2634-1G>A)                                                                          | 0.6              | 69  | Oct 2011 to Dec 2015 |                                                   |               |
|  |  |  | <i>BRCA1</i> | Undefined pathogenic                                                                                  | 0.0              | 172 | Jun 2013 to Aug 2014 | Hart <i>et al</i> , 2016<br>(Linked: NCT01953640) | (56)<br>(109) |
|  |  |  |              | All <i>BRCA1</i> (c.C3893A)                                                                           | 0.6              | 69  | Oct 2011 to Dec 2015 |                                                   |               |
|  |  |  | <i>BRCA2</i> | All <i>BRCA2</i> mutations (c.5946delT; c.C9076T; c.5946delT; c.C9285T; c.5946delT)                   | 2.9              | 69  | Oct 2011 to Dec 2015 | Antonarakis <i>et al</i> , 2018                   | (34)          |

|  |  |  |  |                                                                                                                                                           |     |     |                      |                               |      |                                                |            |
|--|--|--|--|-----------------------------------------------------------------------------------------------------------------------------------------------------------|-----|-----|----------------------|-------------------------------|------|------------------------------------------------|------------|
|  |  |  |  | <i>BRCA2</i> (c.5946delT) <sup>a</sup>                                                                                                                    | 0.6 | 172 | Oct 2011 to Dec 2015 |                               |      |                                                |            |
|  |  |  |  | <i>BRCA2</i> (c.C9076T) <sup>a</sup>                                                                                                                      | 0.6 | 172 | Oct 2011 to Dec 2015 |                               |      |                                                |            |
|  |  |  |  | <i>BRCA2</i> (c.C9285T) <sup>a</sup>                                                                                                                      | 0.6 | 141 | Oct 2011 to Dec 2015 |                               |      |                                                |            |
|  |  |  |  | All <i>BRCA2</i> variants                                                                                                                                 | 5.7 | 172 | 2001 to 2015         | Pomerantz <i>et al</i> , 2017 | (85) |                                                |            |
|  |  |  |  | c.1189_1190insTTAG; p.Q>397>fs <sup>a</sup>                                                                                                               | 0.7 | 172 | 2001 to 2015         |                               |      |                                                |            |
|  |  |  |  | c.2330dupA; p.D>777>fs <sup>a</sup>                                                                                                                       | 0.7 | 172 | 2001 to 2015         |                               |      |                                                |            |
|  |  |  |  | c.3545_3546del; p.F>1182>fs <sup>a</sup>                                                                                                                  | 0.7 | 141 | 2001 to 2015         |                               |      |                                                |            |
|  |  |  |  | c.5946delTT; p.S>1982>fs <sup>a</sup>                                                                                                                     | 2.1 | 141 | 2001 to 2015         |                               |      |                                                |            |
|  |  |  |  | c.6275_6276del; p.L>2092>fs <sup>a</sup>                                                                                                                  | 0.7 | 141 | 2001 to 2015         |                               |      |                                                |            |
|  |  |  |  | c.8537_8538del p.E>2846>fs <sup>a</sup>                                                                                                                   | 0.7 | 69  | 2001 to 2015         |                               |      |                                                |            |
|  |  |  |  | All pathogenic (c.469_470delAA; p.Lys157ValfsX25 (frameshift); c.6444dupT; p.Ile2149TyrfsX2 frameshift; c.9513_9516delACTT; p.Leu3172AlafsX44 frameshift) | 4.3 | 141 | Jun 2013 to Aug 2014 |                               |      | Hart <i>et al</i> , 2016 (Linked: NCT01953640) | (56) (109) |
|  |  |  |  | c.469_470delAA; p.Lys157ValfsX25 (frameshift) <sup>a</sup>                                                                                                | 1.4 | 141 | Jun 2013 to Aug 2014 |                               |      |                                                |            |



|  |  |  |               |                                                                                                                                                                                                                                                                                                                                                                                                          |                  |     |                      |                                 |      |
|--|--|--|---------------|----------------------------------------------------------------------------------------------------------------------------------------------------------------------------------------------------------------------------------------------------------------------------------------------------------------------------------------------------------------------------------------------------------|------------------|-----|----------------------|---------------------------------|------|
|  |  |  |               | c.6444dupT; p.Ile2149TyrfsX2 frameshift †                                                                                                                                                                                                                                                                                                                                                                | 1.4              | 69  | Jun 2013 to Aug 2014 |                                 |      |
|  |  |  |               | c.9513_9516delACTT; p.Leu3172AlafsX44 frameshift <sup>a</sup>                                                                                                                                                                                                                                                                                                                                            | 1.4              | 141 | Jun 2013 to Aug 2014 |                                 |      |
|  |  |  | <i>CHEK2</i>  | All <i>CHEK2</i> (c.A349G)                                                                                                                                                                                                                                                                                                                                                                               | 0.6              | 69  | Oct 2011 to Dec 2015 | <i>Antonarakis et al</i> , 2018 | (34) |
|  |  |  | DDR           | 50 defined DDR genes, including: <i>ATM, ATR, BRCA1, BRCA2, CHEK2, FANCA, FANCD2, MLH1, MRE11A, NBN, PALB2, RAD51C; BAP1, BARD1, BLM, BRAP, BRIP1, CDH1, CDK12, CENPQ, CHEK1, EPCAM1, ERCC1, ERCC2, ERCC3, ERCC4, ERCC6, FAM175A, FAM175B, FANCC, FANCD2, FANCE, FANCF, FANCG, FANCI, FANCL, GEN1, HDAC2, MLH3, MSH2, MSH6, MUTYH, PIF1, PMS2, RAD51, RAD51B, RAD51D, RAD54L, RDM1, TP53, and XRCC2.</i> | 12.8             | 172 | Oct 2011 to Dec 2015 |                                 |      |
|  |  |  | <i>FANCA</i>  | NR                                                                                                                                                                                                                                                                                                                                                                                                       | 0.0              | 69  | Oct 2011 to Dec 2015 |                                 |      |
|  |  |  |               | All <i>FANCA</i> c.A>100>T; p.K>34>X                                                                                                                                                                                                                                                                                                                                                                     | 0.7 <sup>c</sup> | 172 | 2001 to 2015         |                                 |      |
|  |  |  | <i>MLH1</i>   | NR                                                                                                                                                                                                                                                                                                                                                                                                       | 0.0              | 141 | Oct 2011 to Dec 2015 | <i>Antonarakis et al</i> , 2018 | (34) |
|  |  |  | <i>MRE11A</i> | NR                                                                                                                                                                                                                                                                                                                                                                                                       | 0.0              | 172 | Oct 2011 to Dec 2015 |                                 |      |

|  |  |    |                |                                 |                   |     |                      |                                                                          |                |
|--|--|----|----------------|---------------------------------|-------------------|-----|----------------------|--------------------------------------------------------------------------|----------------|
|  |  |    | <i>NBN</i>     | NR                              | 0.0               | 141 | Oct 2011 to Dec 2015 |                                                                          |                |
|  |  |    | <i>PALB2</i>   | NR                              | 0.0               | 172 | Oct 2011 to Dec 2015 |                                                                          |                |
|  |  |    | <i>RAD51 C</i> | NR                              | 0.0               | 172 | Oct 2011 to Dec 2015 |                                                                          |                |
|  |  | PC | <i>ATM</i>     | 25 <i>ATM</i> genetic variants  | 44.0 <sup>c</sup> | 172 | Jun 1990 to Mar 2006 | Cesaretti <i>et al</i> , 2007<br>(Linked: Cesaretti <i>et al</i> , 2005) | (41);<br>(110) |
|  |  |    |                | <i>ATM</i> 5557G>A <sup>a</sup> | 9.0 <sup>b</sup>  | 172 | NR                   | Zhu <i>et al</i> , 2010                                                  | (101)          |

<sup>a</sup>Analysis for a specific mutation (not all mutations for a given gene), these studies were not highlighted in grey; <sup>b</sup>high risk of bias for country representation and statistical analysis; <sup>c</sup>high risk of bias for country representation.

Treatments were as follows: Nientiedt 2017 (docetaxel); Antonarakis 2018 (enzalutamide or abiraterone); Hart 2016 (androgen deprivation therapy); Pomerantz 2017 (carboplatin-based chemotherapy); Cesaretti 2007 (brachytherapy).

*ATM*, ataxia telangiectasia mutated; *ATR*, ataxia telangiectasia and Rad3-related protein; *BAP1*, *BRCA1*-associated protein 1; *BLM*, Bloom syndrome RecQ like helicase; *BRCA*, breast cancer susceptibility gene; *BRAP*, *BRCA1*-associated binding protein; *BRIP1*, *BRCA1* interacting protein C-terminal helicase 1; *CDH1*, cadherin 1; *CDK*, cyclin-dependent kinase; *CENPQ*, centromere protein Q; *CHEK2*, checkpoint kinase 2; *CRPC*, castration-resistant PC; *DDR*, DNA damage repair; *EPCAM*, epithelial cell adhesion molecule; *ERCC*, excision repair cross-complementation group; *FAM175*, family with sequence similarity 175, member; *FANC*, Fanconi anemia complementation group; *GEN1*, *GEN1*, Holliday junction 5' flap endonuclease; *HDAC*, histone deacetylase; *m*, metastatic; *MLH1*, mutL homolog 1; *MRE11A*, *MRE11* homolog A, double-strand break repair nuclease; *MSH*, muS homolog; *MUTYH*, mutY DNA glycosylase; *NBN*, nibrin; *PALB2*, partner and localizer of *BRCA2*; *PC*, prostate cancer; *PIF1*, PIF1 5'-to-3' DNA helicase; *PMS2*, *PMS1* homolog 2, mismatch repair system component; *RAD*, DNA repair protein; *RDM1*, *RAD52* motif containing 1XRCC, x-ray repair cross complementing.

## D2. DDR mutations in patients with young-onset PC.

| Country | PC Group                   | Selected population        | Germline or somatic mutation | Definition                                                                     | Period of data collection | Gene         | % prevalence | n    | Author, year                   | References  |
|---------|----------------------------|----------------------------|------------------------------|--------------------------------------------------------------------------------|---------------------------|--------------|--------------|------|--------------------------------|-------------|
| UK      | Young-onset PC (≤65 years) | Young-onset PC (≤65 years) | Germline                     | All <i>BRCA2</i> (protein-truncating mutations - 16 frameshift and 3 nonsense) | NR                        | <i>BRCA2</i> | 1.2          | 1589 | Kote-Jarai <i>et al</i> , 2011 | (104); (64) |
|         | Young-onset PC (≤55 years) | Young-onset PC (≤55 years) |                              | All <i>BRCA2</i> (deleterious; 5 frameshift, 1 splice site)                    | 1992 to 1999              |              | 2.3          | 263  | Edwards <i>et al</i> , 2010    | (105); (44) |
| USA     |                            |                            |                              | All protein truncating and SNPs in <i>BRCA2</i>                                | Jan 1993 to Dec 2005      |              | 0.69         | 290  | Agalliu <i>et al</i> , 2007    | (31)        |

## E2. DDR mutations in African-American patients.

| Country | PC Group | Selected population | Germline or somatic | Definition | Period of data collection | Gene | % prevalence | n | Author, year | References |
|---------|----------|---------------------|---------------------|------------|---------------------------|------|--------------|---|--------------|------------|
|---------|----------|---------------------|---------------------|------------|---------------------------|------|--------------|---|--------------|------------|

|     |                  |                  |          |                                                                |    |              |     |     |                               |      |
|-----|------------------|------------------|----------|----------------------------------------------------------------|----|--------------|-----|-----|-------------------------------|------|
|     |                  |                  | mutation |                                                                |    |              |     |     |                               |      |
| USA | African American | African American | Somatic  | Pathogenic and variant of unknown significance (VUS) mutations | NR | <i>BRCA2</i> | 3.5 | 857 | Petrovics <i>et al</i> , 2016 | (84) |
|     |                  |                  | Germline | DDR ( <i>BRCA1</i> or <i>BRCA2</i> )                           | NR | DDR          | 3.7 | 857 |                               |      |

**F. DDR mutations in patients with lethal PC.**

| Country       | PC Group  | Selected population | Germline or somatic mutation | Definition                                       | Period of data collection | Gene | % prevalence | n   | Author, yr                                                                                                                               | References                        |
|---------------|-----------|---------------------|------------------------------|--------------------------------------------------|---------------------------|------|--------------|-----|------------------------------------------------------------------------------------------------------------------------------------------|-----------------------------------|
| Multinational | Lethal PC | Lethal PC           | Germline                     | DNA repair gene mutation (no further definition) | NR                        | DDR  | 21.4         | 313 | Na <i>et al</i> , 2017<br><br>(Linked: Na <i>et al</i> , 2017; Zheng <i>et al</i> , 2017; Na <i>et al</i> , 2016; Na <i>et al</i> , 2017 | (106); (111); (112); (113); (77)) |

**Appendix S5. Baseline characteristics.**

|                                                                                                                                        |
|----------------------------------------------------------------------------------------------------------------------------------------|
| <b>Abida <i>et al</i>, 2017 (30)</b>                                                                                                   |
| USA                                                                                                                                    |
| PC; mPC; mCRPC. Diagnosis: Histology                                                                                                   |
| Other details (Mixed population of locoregional (n=50); biochemically recurrent (n=53); metastatic (n=348))                            |
| Population (further details): unselected (NR)                                                                                          |
| Treatment (further details): NR (NR)                                                                                                   |
| Total (n=451)                                                                                                                          |
| Mean age (SD): NR (NR)                                                                                                                 |
| Median age (range): 61 (41, 84)                                                                                                        |
| Ethnicity: White non-Hispanic (23.7); White Hispanic (0.7); White unknown (61.6); Black (5.3); Asian (1.6); Unknown (6.9); Other (0.2) |
| Gleason score: 6 (5.5); 7 (31.0); 8-10 (57.2); unknown (6.2)                                                                           |
| AJCC stage: NR                                                                                                                         |
| TNM stage: M0 (75); M1 (24); Unknown MX (1)                                                                                            |
| ECOG score                                                                                                                             |
| 0: NR                                                                                                                                  |
| 1: NR                                                                                                                                  |
| 0-1: NR                                                                                                                                |
| ≥2: NR                                                                                                                                 |
| Previous treatments: Surgery (57); ADT (23); Radiation +/- ADT (16); Other/Unknown (4)                                                 |
| Familial history of PC: NR                                                                                                             |

|                                                                                                                                                                                                                                                                                                                                     |
|-------------------------------------------------------------------------------------------------------------------------------------------------------------------------------------------------------------------------------------------------------------------------------------------------------------------------------------|
| Mean years since diagnosis (SD): NR (NR)                                                                                                                                                                                                                                                                                            |
| Median years since diagnosis (range): NR (NR)                                                                                                                                                                                                                                                                                       |
| Mean PSA ng/ml (SD): 9.1 (NR)                                                                                                                                                                                                                                                                                                       |
| Median PSA ng/ml (range): NR (0.9, 11330)                                                                                                                                                                                                                                                                                           |
| Comments: Age and PSA are mean levels at diagnosis; 451 patients were included for somatic mutation analysis; 221 patients were included for germline mutation analysis                                                                                                                                                             |
| ADT, androgen deprivation therapy; AJCC, American Joint Committee on Cancer; CRPC, castration-resistant PC; ECOG, Eastern Cooperative Oncology Group; m, metastatic; NR, not reported; PC, prostate cancer; PSA, prostate-specific antigen; SD, standard deviation; TNM, Tumor Nodes Metastasis classification of malignant tumors. |

|                                                                                        |
|----------------------------------------------------------------------------------------|
| <b>Agalliu <i>et al</i>, 2007 (31)</b>                                                 |
| USA                                                                                    |
| Other. Diagnosis: Histology                                                            |
| Other details (early onset, <55 years)                                                 |
| Population (further details): unselected (NR)                                          |
| Treatment (further details): NR (NR)                                                   |
| Total (n=290)                                                                          |
| Mean age (SD): NR (NR)                                                                 |
| Median age (range): NR (NR)                                                            |
| Ethnicity: Caucasian (86.8); African American (11.4); Jewish (1.7)                     |
| Gleason score: 2-4 (6.6); 5-6 (52.1); 3+4 (27.2); 4+3 (6.9); 8-10 (5.5); Missing (1.7) |
| AJCC stage: NR                                                                         |
| TNM stage: NR                                                                          |

|                                                                                                                                                                                                                                                    |
|----------------------------------------------------------------------------------------------------------------------------------------------------------------------------------------------------------------------------------------------------|
| ECOG score                                                                                                                                                                                                                                         |
| 0: NR                                                                                                                                                                                                                                              |
| 1: NR                                                                                                                                                                                                                                              |
| 0-1: NR                                                                                                                                                                                                                                            |
| ≥2: NR                                                                                                                                                                                                                                             |
| Previous treatments: NR                                                                                                                                                                                                                            |
| Familial history of PC: 108 (37.3)                                                                                                                                                                                                                 |
| Mean years since diagnosis (SD): NR (NR)                                                                                                                                                                                                           |
| Median years since diagnosis (range): NR (NR)                                                                                                                                                                                                      |
| Mean PSA ng/ml (SD): NR (NR)                                                                                                                                                                                                                       |
| Median PSA ng/ml (range): NR (NR)                                                                                                                                                                                                                  |
| Comments: 35-49 years (33.4%); 50-54 years (66.6%). PSA ng/ml: 0-3.9 (19); 4.0-9.9 (48.3); 10-19.9 (12.4); ≥20 (10.3); missing (10)                                                                                                                |
| AJCC, American Joint Committee on Cancer; ECOG, Eastern Cooperative Oncology Group; NR, not reported; PC, prostate cancer; PSA, prostate-specific antigen; SD, standard deviation; TNM, Tumor Nodes Metastasis classification of malignant tumors. |

|                                                                                                                                                                                              |
|----------------------------------------------------------------------------------------------------------------------------------------------------------------------------------------------|
| <b>Agalliu <i>et al</i>, 2009 (32)</b>                                                                                                                                                       |
| USA                                                                                                                                                                                          |
| PC. Diagnosis: Reason for prostate cancer diagnosis: Abnormal PSA 741 (73.1), Abnormal DRE 123 (12.1), Symptoms 25 (2.5), TURP for BPH 15 (1.5), Other procedures 57 (5.6), Unknown 18 (1.8) |
| Other details (NR)                                                                                                                                                                           |
| Population (further details): Ashkenazi (NR)                                                                                                                                                 |
| Treatment (further details): NR (NR)                                                                                                                                                         |
| Total (n=979)                                                                                                                                                                                |

|                                                                                                                                                                                                                                                                   |
|-------------------------------------------------------------------------------------------------------------------------------------------------------------------------------------------------------------------------------------------------------------------|
| Mean age (SD): 69.4 (NR)                                                                                                                                                                                                                                          |
| Median age (range): NR (NR)                                                                                                                                                                                                                                       |
| Ethnicity: Ashkenazi Jewish men (100)                                                                                                                                                                                                                             |
| Gleason score: 2-6 (63); 7 (25); 8-10 (12); unknown (8)                                                                                                                                                                                                           |
| AJCC stage: NR                                                                                                                                                                                                                                                    |
| TNM stage: NR                                                                                                                                                                                                                                                     |
| ECOG score<br>0: NR<br>1: NR<br>0-1: NR<br>≥2: NR                                                                                                                                                                                                                 |
| Previous treatments: NR                                                                                                                                                                                                                                           |
| Familial history of PC: 276 (28.2)                                                                                                                                                                                                                                |
| Mean years since diagnosis (SD): NR (NR)                                                                                                                                                                                                                          |
| Median years since diagnosis (range): NR (NR)                                                                                                                                                                                                                     |
| Mean PSA ng/ml (SD): NR (NR)                                                                                                                                                                                                                                      |
| Median PSA ng/ml (range): NR (NR)                                                                                                                                                                                                                                 |
| Comments: familial history in column AO is only data on first-degree family history                                                                                                                                                                               |
| AJCC, American Joint Committee on Cancer; ECOG, Eastern Cooperative Oncology Group; m, metastatic; NR, not reported; PC, prostate cancer; PSA, prostate-specific antigen; SD, standard deviation; TNM, Tumor Nodes Metastasis classification of malignant tumors. |

|                                       |
|---------------------------------------|
| <b>Angele <i>et al</i>, 2004 (13)</b> |
| UK                                    |



|                                               |
|-----------------------------------------------|
| PC. Diagnosis: NR                             |
| Other details (NR)                            |
| Population (further details): unselected (NR) |
| Treatment (further details): NR (NR)          |
| Total (n=637)                                 |
| Mean age (SD): NR (NR)                        |
| Median age (range): NR (43, 86)               |
| Ethnicity: Caucasian (100)                    |
| Gleason score: NR                             |
| AJCC stage: NR                                |
| TNM stage: NR                                 |
| ECOG score                                    |
| 0: NR                                         |
| 1: NR                                         |
| 0-1: NR                                       |
| ≥2: NR                                        |
| Previous treatments: NR                       |
| Familial history of PC: NR                    |
| Mean years since diagnosis (SD): NR (NR)      |
| Median years since diagnosis (range): NR (NR) |
| Mean PSA ng/ml (SD): NR (NR)                  |
| Median PSA ng/ml (range): NR (NR)             |

AJCC, American Joint Committee on Cancer; ECOG, Eastern Cooperative Oncology Group; NR, not reported; PC, prostate cancer; PSA, prostate-specific antigen; SD, standard deviation; TNM, Tumor Nodes Metastasis classification of malignant tumors.

|                                                                                                                                                                                                                                                                          |                                                       |
|--------------------------------------------------------------------------------------------------------------------------------------------------------------------------------------------------------------------------------------------------------------------------|-------------------------------------------------------|
| <b>Annala et al, 2017 (33)</b>                                                                                                                                                                                                                                           |                                                       |
| Canada                                                                                                                                                                                                                                                                   |                                                       |
| PC. Diagnosis: NR<br>Other details (NR)                                                                                                                                                                                                                                  |                                                       |
| Population (further details): unselected (NR)                                                                                                                                                                                                                            |                                                       |
| Treatment (further details): Mixed (AR-directed therapies, including prostatectomy 7 (32%); external beam radiation 5 (23%); androgen deprivation 8 (36%); brachytherapy 2 (9%); docetaxel/cabazitaxel 9 (41%); enzalutamide 5 (23%); abiraterone 8 (36%); Other 0 (0%)) |                                                       |
| DDR+ (n=22)                                                                                                                                                                                                                                                              | DDR- (n=113)                                          |
| Mean age (SD): 63 (NR)<br>Median age (range): NR (NR)                                                                                                                                                                                                                    | Mean age (SD): 64 (NR)<br>Median age (range): NR (NR) |
| Ethnicity: NR                                                                                                                                                                                                                                                            | Ethnicity: NR                                         |
| Gleason score: 6 (9); 7 (23); 8-10 (59); unknown (9)                                                                                                                                                                                                                     | Gleason score: 6 (5); 7 (19); 8-10 (68); unknown (8)  |
| AJCC stage: NR                                                                                                                                                                                                                                                           | AJCC stage: NR                                        |
| TNM stage: NR                                                                                                                                                                                                                                                            | TNM stage: NR                                         |
| ECOG score<br>0: NR<br>1: NR<br>0-1: NR<br>≥2: NR                                                                                                                                                                                                                        | ECOG score<br>0: NR<br>1: NR<br>0-1: NR<br>≥2: NR     |
| Previous treatments: NR                                                                                                                                                                                                                                                  | Previous treatments: NR                               |

|                                                                                                                                                                                                                                                                           |                                               |
|---------------------------------------------------------------------------------------------------------------------------------------------------------------------------------------------------------------------------------------------------------------------------|-----------------------------------------------|
| Familial history of PC: NR                                                                                                                                                                                                                                                | Familial history of PC: NR                    |
| Mean years since diagnosis (SD): NR (NR)                                                                                                                                                                                                                                  | Mean years since diagnosis (SD): NR (NR)      |
| Median years since diagnosis (range): NR (NR)                                                                                                                                                                                                                             | Median years since diagnosis (range): NR (NR) |
| Mean PSA ng/ml (SD): 10.3 (NR)                                                                                                                                                                                                                                            | Mean PSA ng/ml (SD): 27.2 (NR)                |
| Median PSA ng/ml (range): NR (NR)                                                                                                                                                                                                                                         | Median PSA ng/ml (range): NR (NR)             |
| AJCC, American Joint Committee on Cancer; ECOG, AR, androgen receptor; Eastern Cooperative Oncology Group; NR, not reported; PC, prostate cancer; PSA, prostate-specific antigen; SD, standard deviation; TNM, Tumor Nodes Metastasis classification of malignant tumors. |                                               |

|                                                                                                                                                                                                                                                                                                                                                                   |                                                  |
|-------------------------------------------------------------------------------------------------------------------------------------------------------------------------------------------------------------------------------------------------------------------------------------------------------------------------------------------------------------------|--------------------------------------------------|
| <b>Antonarakis <i>et al</i>, 2018 (34)</b>                                                                                                                                                                                                                                                                                                                        |                                                  |
| USA                                                                                                                                                                                                                                                                                                                                                               |                                                  |
| mCRPC. Diagnosis: Histologically confirmed prostate adenocarcinoma, progressive disease despite “castration levels” of serum testosterone (<50 ng/dl), and radiographic metastases on computed tomography (CT) or technetium-99 bone scans. Patients had to have three or more rising serum prostate-specific antigen (PSA) values measured $\geq 2$ weeks apart. |                                                  |
| Other details (NR)                                                                                                                                                                                                                                                                                                                                                |                                                  |
| Population (further details): treatment (enzalutamide or abiraterone)                                                                                                                                                                                                                                                                                             |                                                  |
| Treatment (further details): Enzalutamide was given at 160 mg daily, and abiraterone was given at 1000 mg daily (with prednisone 5 mg twice daily). (NR)                                                                                                                                                                                                          |                                                  |
| DDR+ (n=22)                                                                                                                                                                                                                                                                                                                                                       | DDR- (n=150)                                     |
| Mean age (SD): NR (NR)                                                                                                                                                                                                                                                                                                                                            | Mean age (SD): NR (NR)                           |
| Median age (range): 64 (NR)                                                                                                                                                                                                                                                                                                                                       | Median age (range): 70 (NR)                      |
| Ethnicity: White (86.4); non-white (13.6)                                                                                                                                                                                                                                                                                                                         | Ethnicity: White (87.3); non-white (12.7)        |
| Gleason score: $\geq 8$ (68.2)                                                                                                                                                                                                                                                                                                                                    | Gleason score: $\geq 8$ (65.2)                   |
| AJCC stage: NR                                                                                                                                                                                                                                                                                                                                                    | AJCC stage: NR                                   |
| TNM stage: T1/T2 (21.1); T3/T4 (78.9); M1 (19.0)                                                                                                                                                                                                                                                                                                                  | TNM stage: T1/T2 (55.8); T3/T4 (44.2); M1 (26.1) |

|                                                                                                                                                                                                                                                                                                                          |                                                                                            |
|--------------------------------------------------------------------------------------------------------------------------------------------------------------------------------------------------------------------------------------------------------------------------------------------------------------------------|--------------------------------------------------------------------------------------------|
| ECOG score<br>0: NR<br>1: NR<br>0-1: NR<br>≥2: NR                                                                                                                                                                                                                                                                        | ECOG score<br>0: NR<br>1: NR<br>0-1: NR<br>≥2: NR                                          |
| Previous treatments: chemotherapy (22.7)                                                                                                                                                                                                                                                                                 | Previous treatments: chemotherapy (23.3)                                                   |
| Familial history of PC: NR                                                                                                                                                                                                                                                                                               | Familial history of PC: NR                                                                 |
| Mean years since diagnosis (SD): 6.3 (NR)<br>Median years since diagnosis (range): NR (NR)                                                                                                                                                                                                                               | Mean years since diagnosis (SD): 7.4 (NR)<br>Median years since diagnosis (range): NR (NR) |
| Mean PSA ng/ml (SD): NR (NR)<br>Median PSA ng/ml (range): 22.9 (NR)                                                                                                                                                                                                                                                      | Mean PSA ng/ml (SD): NR (NR)<br>Median PSA ng/ml (range): 22.6 (NR)                        |
| Comments: ECOG ≥1 (5.3)                                                                                                                                                                                                                                                                                                  | Comments: ECOG ≥1 (32.1)                                                                   |
| AJCC, American Joint Committee on Cancer; CRPC, castration-resistant PC; DDR, DNA damage repair; ECOG, Eastern Cooperative Oncology Group; m, metastatic; NR, not reported; PC, prostate cancer; PSA, prostate-specific antigen; SD, standard deviation; TNM, Tumor Nodes Metastasis classification of malignant tumors. |                                                                                            |

|                                                                                                           |
|-----------------------------------------------------------------------------------------------------------|
| <b>Beltran <i>et al</i>, 2013 (22)</b>                                                                    |
| USA                                                                                                       |
| Primary PC; mPC; CRPC. Diagnosis: Histology<br>Other details (Localized PC, hormone-naïve mPC, and mCRPC) |
| Population (further details): unselected (NR)                                                             |
| Treatment (further details): NR (NR)                                                                      |
| Total (n=45)                                                                                              |

|                                                                                                                                                                                                                                                                                                  |
|--------------------------------------------------------------------------------------------------------------------------------------------------------------------------------------------------------------------------------------------------------------------------------------------------|
| Mean age (SD): 63 (NR)                                                                                                                                                                                                                                                                           |
| Median age (range): NR (NR)                                                                                                                                                                                                                                                                      |
| Ethnicity: NR                                                                                                                                                                                                                                                                                    |
| Gleason score: NR                                                                                                                                                                                                                                                                                |
| AJCC stage: NR                                                                                                                                                                                                                                                                                   |
| TNM stage: NR                                                                                                                                                                                                                                                                                    |
| ECOG score<br>0: NR<br>1: NR<br>0-1: NR<br>≥2: NR                                                                                                                                                                                                                                                |
| Previous treatments: NR                                                                                                                                                                                                                                                                          |
| Familial history of PC: NR                                                                                                                                                                                                                                                                       |
| Mean years since diagnosis (SD): NR (NR)                                                                                                                                                                                                                                                         |
| Median years since diagnosis (range): NR (NR)                                                                                                                                                                                                                                                    |
| Mean PSA ng/ml (SD): NR (NR)                                                                                                                                                                                                                                                                     |
| Median PSA ng/ml (range): NR (NR)                                                                                                                                                                                                                                                                |
| Comments: Mean age calculated based on 20 out of 45 patients in supplementary table 3                                                                                                                                                                                                            |
| AJCC, American Joint Committee on Cancer; CRPC, castration-resistant PC; ECOG, Eastern Cooperative Oncology Group; m, metastatic; NR, not reported; PC, prostate cancer; PSA, prostate-specific antigen; SD, standard deviation; TNM, Tumor Nodes Metastasis classification of malignant tumors. |

|                                                                                 |
|---------------------------------------------------------------------------------|
| <b>Beltran <i>et al</i>, 2015 (35)</b>                                          |
| USA                                                                             |
| Primary PC; mPC. Diagnosis: Histology                                           |
| Other details (Mixed population of localized PC (n=69) and advanced mPC (n=29)) |
| Population (further details): unselected (NR)                                   |
| Treatment (further details): NR (NR)                                            |
| Total (n=97)                                                                    |
| Mean age (SD): NR (NR)                                                          |
| Median age (range): NR (NR)                                                     |
| Ethnicity: NR                                                                   |
| Gleason score: NR                                                               |
| AJCC stage: NR                                                                  |
| TNM stage: NR                                                                   |
| ECOG score                                                                      |
| 0: NR                                                                           |
| 1: NR                                                                           |
| 0-1: NR                                                                         |
| ≥2: NR                                                                          |
| Previous treatments: NR                                                         |
| Familial history of PC: NR                                                      |
| Mean years since diagnosis (SD): NR (NR)                                        |
| Median years since diagnosis (range): ()                                        |

|                                                                                                                                                                                                                                                                   |
|-------------------------------------------------------------------------------------------------------------------------------------------------------------------------------------------------------------------------------------------------------------------|
| Mean PSA ng/ml (SD): NR (NR)                                                                                                                                                                                                                                      |
| Median PSA ng/ml (range): NR (NR)                                                                                                                                                                                                                                 |
| Comments: For a full text study with a comprehensive supplementary appendix, there was very little information on population (age, cancer scores, previous treatments, etc)                                                                                       |
| AJCC, American Joint Committee on Cancer; ECOG, Eastern Cooperative Oncology Group; m, metastatic; NR, not reported; PC, prostate cancer; PSA, prostate-specific antigen; SD, standard deviation; TNM, Tumor Nodes Metastasis classification of malignant tumors. |

|                                                                                                                                                                                                                                                                                                                                                                             |
|-----------------------------------------------------------------------------------------------------------------------------------------------------------------------------------------------------------------------------------------------------------------------------------------------------------------------------------------------------------------------------|
| <b>Boudadi <i>et al</i>, 2017 (36)</b>                                                                                                                                                                                                                                                                                                                                      |
| USA                                                                                                                                                                                                                                                                                                                                                                         |
| Other. Diagnosis: Histologically or cytologically confirmed adenocarcinoma of the prostate; Metastatic disease as defined by 2 or more bone metastases confirmed by bone scintigraphy or radiographic soft tissue metastasis; detectable circulating tumor cells (CTCs) with detectable AR-V7 splice-variant by reverse transcriptase (RT)-polymerase chain reaction (PCR). |
| Other details (androgen receptor-variant-7 positive mCRPC)                                                                                                                                                                                                                                                                                                                  |
| Population (further details): unselected (NR)                                                                                                                                                                                                                                                                                                                               |
| Treatment (further details): Nivolumab and ipilimumab (Nivolumab 3 mg/kg IV over 60 minutes and ipilimumab 1 mg/kg IV over 90 minutes every 3 weeks for 12 weeks. Patients then receive maintenance nivolumab 3 mg/kg IV over 60 minutes every 2 weeks for 36 weeks in the absence of disease progression or unacceptable)                                                  |
| Total (n=15)                                                                                                                                                                                                                                                                                                                                                                |
| Mean age (SD): NR (NR)                                                                                                                                                                                                                                                                                                                                                      |
| Median age (range): 65 (NR)                                                                                                                                                                                                                                                                                                                                                 |
| Ethnicity: NR                                                                                                                                                                                                                                                                                                                                                               |
| Gleason score: NR                                                                                                                                                                                                                                                                                                                                                           |
| AJCC stage: NR                                                                                                                                                                                                                                                                                                                                                              |
| TNM stage: NR                                                                                                                                                                                                                                                                                                                                                               |

|                                                                                                                                                                                                                                                                                                                   |
|-------------------------------------------------------------------------------------------------------------------------------------------------------------------------------------------------------------------------------------------------------------------------------------------------------------------|
| ECOG score                                                                                                                                                                                                                                                                                                        |
| 0: NR                                                                                                                                                                                                                                                                                                             |
| 1: NR                                                                                                                                                                                                                                                                                                             |
| 0-1: NR                                                                                                                                                                                                                                                                                                           |
| ≥2: NR                                                                                                                                                                                                                                                                                                            |
| Previous treatments: ≥4 prior treatment for mCRPC (60)                                                                                                                                                                                                                                                            |
| Familial history of PC: NR                                                                                                                                                                                                                                                                                        |
| Mean years since diagnosis (SD): NR (NR)                                                                                                                                                                                                                                                                          |
| Median years since diagnosis (range): NR (NR)                                                                                                                                                                                                                                                                     |
| Mean PSA ng/ml (SD): NR (NR)                                                                                                                                                                                                                                                                                      |
| Median PSA ng/ml (range): 115) (NR)                                                                                                                                                                                                                                                                               |
| Comments: Median follow-up 8.4 months (range: 1.9, 10.5 months)                                                                                                                                                                                                                                                   |
| AJCC, American Joint Committee on Cancer; CRPC, castration-resistant PC; ECOG, Eastern Cooperative Oncology Group; m, metastatic; IV, intravenous; NR, not reported; PC, prostate cancer; PSA, prostate-specific antigen; SD, standard deviation; TNM, Tumor Nodes Metastasis classification of malignant tumors. |

|                                               |
|-----------------------------------------------|
| <b>Browning <i>et al</i>, 2006 (14)</b>       |
| USA                                           |
| PC. Diagnosis: Histology                      |
| Other details (NR)                            |
| Population (further details): unselected (NR) |
| Treatment (further details): NR (NR)          |
| Total (n=98)                                  |



|                                                                                                                                                                                                                                                    |
|----------------------------------------------------------------------------------------------------------------------------------------------------------------------------------------------------------------------------------------------------|
| Mean age (SD): NR (NR)                                                                                                                                                                                                                             |
| Median age (range): 63 (40, 81)                                                                                                                                                                                                                    |
| Ethnicity: White (100)                                                                                                                                                                                                                             |
| Gleason score: $\leq 6$ (63.3); $>6$ (36.7)                                                                                                                                                                                                        |
| AJCC stage: I (9.2); II (68.4); III (22.4)                                                                                                                                                                                                         |
| TNM stage: NR                                                                                                                                                                                                                                      |
| ECOG score<br>0: NR<br>1: NR<br>0-1: NR<br>$\geq 2$ : NR                                                                                                                                                                                           |
| Previous treatments: radical prostatectomy (100)                                                                                                                                                                                                   |
| Familial history of PC: NR                                                                                                                                                                                                                         |
| Mean years since diagnosis (SD): NR (NR)                                                                                                                                                                                                           |
| Median years since diagnosis (range): NR (NR)                                                                                                                                                                                                      |
| Mean PSA ng/ml (SD): $\leq 4$ ng/ml (17.3%); 4-10 ng/ml (53.1); $\geq 10$ ng/ml (29.6) (NR)                                                                                                                                                        |
| Median PSA ng/ml (range): NR (NR)                                                                                                                                                                                                                  |
| AJCC, American Joint Committee on Cancer; ECOG, Eastern Cooperative Oncology Group; NR, not reported; PC, prostate cancer; PSA, prostate-specific antigen; SD, standard deviation; TNM, Tumor Nodes Metastasis classification of malignant tumors. |

|                                           |
|-------------------------------------------|
| <b>The Cancer Genome Atlas, 2015 (37)</b> |
| Multinational                             |

|                                                                            |
|----------------------------------------------------------------------------|
| PC. Diagnosis: Histology                                                   |
| Other details (NR)                                                         |
| Population (further details): unselected (NR)                              |
| Treatment (further details): radical prostatectomy (NR)                    |
| Total (n=333)                                                              |
| Mean age (SD): NR (NR)                                                     |
| Median age (range): 61 (43, 76)                                            |
| Ethnicity: Caucasian (81.1); African descent (12.9); Asian (2.4); NR (3.6) |
| Gleason score: 3+3 (19.5); 3+4 (30.6); 4+3 (23.4); $\geq 8$ (26.4)         |
| AJCC stage: NR                                                             |
| TNM stage: NR                                                              |
| ECOG score                                                                 |
| 0: NR                                                                      |
| 1: NR                                                                      |
| 0-1: NR                                                                    |
| $\geq 2$ : NR                                                              |
| Previous treatments: radical prostatectomy                                 |
| Familial history of PC: NR                                                 |
| Mean years since diagnosis (SD): NR (NR)                                   |
| Median years since diagnosis (range): NR (NR)                              |
| Mean PSA ng/ml (SD): 7.4 (NR)                                              |
| Median PSA ng/ml (range): NR (1.6, 87)                                     |

AJCC, American Joint Committee on Cancer; ECOG, Eastern Cooperative Oncology Group; NR, not reported; PC, prostate cancer; PSA, prostate-specific antigen; SD, standard deviation; TNM, Tumor Nodes Metastasis classification of malignant tumors.

| <b>Castro <i>et al</i>, 2011 (38)</b>         |                              |                              |                              |
|-----------------------------------------------|------------------------------|------------------------------|------------------------------|
| UK                                            |                              |                              |                              |
| PC. Diagnosis: NR<br>Other details (NR)       |                              |                              |                              |
| Population (further details): unselected (NR) |                              |                              |                              |
| Treatment (further details): NR (NR)          |                              |                              |                              |
| Total (n=2181)                                | <i>BRCA1+</i> (n=5)          | <i>BRCA2+</i> (n=34)         | DDR- (n=2142)                |
| Mean age (SD): NR (NR)                        | Mean age (SD): NR (NR)       | Mean age (SD): NR (NR)       | Mean age (SD): NR (NR)       |
| Median age (range): 57 (32, 89)               | Median age (range): NR (NR)  | Median age (range): NR (NR)  | Median age (range): NR (NR)  |
| Ethnicity: NR                                 | Ethnicity: NR                | Ethnicity: NR                | Ethnicity: NR                |
| Gleason score: NR                             | Gleason score: $\geq 8$ (20) | Gleason score: $\geq 8$ (50) | Gleason score: $\geq 8$ (21) |
| AJCC stage: NR                                | AJCC stage: NR               | AJCC stage: NR               | AJCC stage: NR               |
| TNM stage: NR                                 | TNM stage: N1 (50); M1 (20)  | TNM stage: N1 (35); M1 (21)  | TNM stage: N1 (11); M1 (9)   |
| ECOG score                                    | ECOG score                   | ECOG score                   | ECOG score                   |
| 0: NR                                         | 0: NR                        | 0: NR                        | 0: NR                        |
| 1: NR                                         | 1: NR                        | 1: NR                        | 1: NR                        |
| 0-1: NR                                       | 0-1: NR                      | 0-1: NR                      | 0-1: NR                      |
| $\geq 2$ : NR                                 | $\geq 2$ : NR                | $\geq 2$ : NR                | $\geq 2$ : NR                |
| Previous treatments: NR                       | Previous treatments: NR      | Previous treatments: NR      | Previous treatments: NR      |
| Familial history of PC: NR                    | Familial history of PC: NR   | Familial history of PC: NR   | Familial history of PC: NR   |

|                                                                                                                                                                                                                                                                                                                      |                                                                                           |                                                                                           |                                                                                           |
|----------------------------------------------------------------------------------------------------------------------------------------------------------------------------------------------------------------------------------------------------------------------------------------------------------------------|-------------------------------------------------------------------------------------------|-------------------------------------------------------------------------------------------|-------------------------------------------------------------------------------------------|
| Mean years since diagnosis (SD): NR (NR)<br>Median years since diagnosis (range): NR (NR)                                                                                                                                                                                                                            | Mean years since diagnosis (SD): NR (NR)<br>Median years since diagnosis (range): NR (NR) | Mean years since diagnosis (SD): NR (NR)<br>Median years since diagnosis (range): NR (NR) | Mean years since diagnosis (SD): NR (NR)<br>Median years since diagnosis (range): NR (NR) |
| Mean PSA ng/ml (SD): NR (NR)<br>Median PSA ng/ml (range): NR (NR)                                                                                                                                                                                                                                                    | Mean PSA ng/ml (SD): NR (NR)<br>Median PSA ng/ml (range): NR (NR)                         | Mean PSA ng/ml (SD): NR (NR)<br>Median PSA ng/ml (range): NR (NR)                         | Mean PSA ng/ml (SD): NR (NR)<br>Median PSA ng/ml (range): NR (NR)                         |
| Comments: details for <i>BRCA1</i> , <i>BRCA2</i> , and non-carriers                                                                                                                                                                                                                                                 | Comments: details for <i>BRCA1</i> , <i>BRCA2</i> , and non-carriers                      | Comments: details for <i>BRCA1</i> , <i>BRCA2</i> , and non-carriers                      | Comments: details for <i>BRCA1</i> , <i>BRCA2</i> , and non-carriers                      |
| AJCC, American Joint Committee on Cancer; <i>BRCA</i> , breast cancer susceptibility gene; ECOG, Eastern Cooperative Oncology Group; IV, intravenous; NR, not reported; PC, prostate cancer; PSA, prostate-specific antigen; SD, standard deviation; TNM, Tumor Nodes Metastasis classification of malignant tumors. |                                                                                           |                                                                                           |                                                                                           |

|                                                                                                                                                                                                                                                                                                                                                                                                                                                                                            |                       |                       |               |
|--------------------------------------------------------------------------------------------------------------------------------------------------------------------------------------------------------------------------------------------------------------------------------------------------------------------------------------------------------------------------------------------------------------------------------------------------------------------------------------------|-----------------------|-----------------------|---------------|
| <b>Castro <i>et al</i>, 2013 (39)</b>                                                                                                                                                                                                                                                                                                                                                                                                                                                      |                       |                       |               |
| UK                                                                                                                                                                                                                                                                                                                                                                                                                                                                                         |                       |                       |               |
| PC. Diagnosis: Histology<br>Other details (NR)                                                                                                                                                                                                                                                                                                                                                                                                                                             |                       |                       |               |
| Population (further details): unselected (NR)                                                                                                                                                                                                                                                                                                                                                                                                                                              |                       |                       |               |
| Treatment (further details): Mixed treatment Primary radical treatment in non-metastatic disease: External-beam radiotherapy (35.4%), Radical prostatectomy (33.8%), Brachytherapy (3.1%), Any local radical treatment (72.3%). Primary hormone treatment indication for early disease: Neoadjuvant-adjuvant (35.9%), Single therapy (6.3%). Primary hormone treatment indication for advanced disease: Palliative (55.4%). Other treatments for metastatic disease: chemotherapy (17.1%). |                       |                       |               |
| DDR+ (n=79)                                                                                                                                                                                                                                                                                                                                                                                                                                                                                | <i>BRCA1</i> + (n=18) | <i>BRCA2</i> + (n=61) | DDR- (n=1940) |

|                                                                                           |                                                                                           |                                                                                           |                                                                                           |
|-------------------------------------------------------------------------------------------|-------------------------------------------------------------------------------------------|-------------------------------------------------------------------------------------------|-------------------------------------------------------------------------------------------|
| Mean age (SD): NR (NR)<br>Median age (range): 58.3 (41.7, 88)                             | Mean age (SD): NR (NR)<br>Median age (range): 60.8 (48.3, 73.5)                           | Mean age (SD): NR (NR)<br>Median age (range): 57.6 (41.7, 88)                             | Mean age (SD): NR (NR)<br>Median age (range): 57.2 (32.3, 88.9)                           |
| Ethnicity: NR                                                                             | Ethnicity: NR                                                                             | Ethnicity: NR                                                                             | Ethnicity: NR                                                                             |
| Gleason score: ≤6 (25.3); 7 (24.1); 8-10 (35.4); unknown=(15.2)                           | Gleason score: ≤6 (33.3); 7 (22.2); 8-10 (27.8); unknown=(16.7)                           | Gleason score: ≤6 (23.0); 7 (24.6); 8-10 (37.7); unknown=(14.8)                           | Gleason score: ≤6 (37.8); 7 (26.3); 8-10 (15.4); unknown=(20.5)                           |
| AJCC stage: I (10.1); IIa (11.4); IIb (16.5); III (16.5); IV (27.8); not assessed (17.7)  | AJCC stage: I (11.1); IIa (5.6); IIb (16.7); III (22.2); IV (16.7); not assessed (27.8)   | AJCC stage: I (9.8); IIa (13.1); IIb (16.4); III (18.1); IV (31.1); not assessed (11.5)   | AJCC stage: I (19.2); IIa (16.8); IIb (11.0); III (18.9); IV (12.8); not assessed (21.3)  |
| TNM stage: NR                                                                             | TNM stage: NR                                                                             | TNM stage: NR                                                                             | TNM stage: NR                                                                             |
| ECOG score<br>0: NR<br>1: NR<br>0-1: NR<br>≥2: NR                                         |
| Previous treatments: NR                                                                   | Previous treatments: NR                                                                   | Previous treatments: NR                                                                   | Previous treatments: NR                                                                   |
| Familial history of PC: NR                                                                |
| Mean years since diagnosis (SD): NR (NR)<br>Median years since diagnosis (range): NR (NR) | Mean years since diagnosis (SD): NR (NR)<br>Median years since diagnosis (range): NR (NR) | Mean years since diagnosis (SD): NR (NR)<br>Median years since diagnosis (range): NR (NR) | Mean years since diagnosis (SD): NR (NR)<br>Median years since diagnosis (range): NR (NR) |
| Mean PSA ng/ml (SD): NR (NR)<br>Median PSA ng/ml (range): 11.5 (0.5, 3000)                | Mean PSA ng/ml (SD): NR (NR)<br>Median PSA ng/ml (range): 8.9 (0.7, 3000)                 | Mean PSA ng/ml (SD): NR (NR)<br>Median PSA ng/ml (range): 15.1 (0.5, 761)                 | Mean PSA ng/ml (SD): NR (NR)<br>Median PSA ng/ml (range): 11.3 (0.2, 7800)                |

|                                                                                                                                                                                                                                                                                           |                                   |                                   |                                   |
|-------------------------------------------------------------------------------------------------------------------------------------------------------------------------------------------------------------------------------------------------------------------------------------------|-----------------------------------|-----------------------------------|-----------------------------------|
| Comments: TNM reported separately                                                                                                                                                                                                                                                         | Comments: TNM reported separately | Comments: TNM reported separately | Comments: TNM reported separately |
| AJCC, American Joint Committee on Cancer; DDR, DNA damage repair; ECOG, Eastern Cooperative Oncology Group; m, metastatic; NR, not reported; PC, prostate cancer; PSA, prostate-specific antigen; SD, standard deviation; TNM, Tumor Nodes Metastasis classification of malignant tumors. |                                   |                                   |                                   |

|                                                                    |                                                                    |
|--------------------------------------------------------------------|--------------------------------------------------------------------|
| <b>Castro <i>et al</i>, 2015 (40)</b>                              |                                                                    |
| UK                                                                 |                                                                    |
| Primary PC. Diagnosis: Histology<br>Other details (NR)             |                                                                    |
| Population (further details): unselected (NR)                      |                                                                    |
| Treatment (further details): radical prostatectomy (NR)            |                                                                    |
| DDR+ (n=35)                                                        | DDR- (n=500)                                                       |
| Mean age (SD): NR (NR)<br>Median age (range): 58.7 (47.1, 65.3)    | Mean age (SD): NR (NR)<br>Median age (range): 56.9 (36.9, 85.8)    |
| Ethnicity: NR                                                      | Ethnicity: NR                                                      |
| Gleason score: ≤6 (42.9); 7 (28.6); 8-10 (25.7); unknown=(2.9)     | Gleason score: ≤6 (56.8); 7 (32.2); 8-10 (8.8); unknown (2.2)      |
| AJCC stage: I (11.4); IIa (22.9); IIb (42.9); III (17.1); IV (5.7) | AJCC stage: I (34.2); IIa (35.4); IIb (12.6); III (15.8); IV (2.0) |
| TNM stage: NR                                                      | TNM stage: NR                                                      |

|                                                                                                                                                                                                                                                                                                                                   |                                                                                           |
|-----------------------------------------------------------------------------------------------------------------------------------------------------------------------------------------------------------------------------------------------------------------------------------------------------------------------------------|-------------------------------------------------------------------------------------------|
| ECOG score<br>0: NR<br>1: NR<br>0-1: NR<br>≥2: NR                                                                                                                                                                                                                                                                                 | ECOG score<br>0: NR<br>1: NR<br>0-1: NR<br>≥2: NR                                         |
| Previous treatments: ADT (14.3)                                                                                                                                                                                                                                                                                                   | Previous treatments: ADT (8.8)                                                            |
| Familial history of PC: NR                                                                                                                                                                                                                                                                                                        | Familial history of PC: NR                                                                |
| Mean years since diagnosis (SD): NR (NR)<br>Median years since diagnosis (range): NR (NR)                                                                                                                                                                                                                                         | Mean years since diagnosis (SD): NR (NR)<br>Median years since diagnosis (range): NR (NR) |
| Mean PSA ng/ml (SD): NR (NR)<br>Median PSA ng/ml (range): 6) (0.5, 29.1)                                                                                                                                                                                                                                                          | Mean PSA ng/ml (SD): NR (NR)<br>Median PSA ng/ml (range): 7.6) (0.7, 138.9)               |
| ADT, androgen deprivation therapy; AJCC, American Joint Committee on Cancer; DDR, DNA damage repair; ECOG, Eastern Cooperative Oncology Group; NR, not reported; PC, prostate cancer; PSA, prostate-specific antigen; SD, standard deviation; TNM, Tumor Nodes Metastasis classification of malignant tumors; UK, United Kingdom. |                                                                                           |

|                                                              |              |
|--------------------------------------------------------------|--------------|
| <b>Castro <i>et al</i>, 2015 (40)</b>                        |              |
| UK                                                           |              |
| Primary PC. Diagnosis: Histology<br>Other details (NR)       |              |
| Population (further details): unselected (NR)                |              |
| Treatment (further details): external-beam radiotherapy (NR) |              |
| DDR+ (n=32)                                                  | DDR- (n=735) |

|                                                                                                                                                                                                                                                                                                               |                                                                                           |
|---------------------------------------------------------------------------------------------------------------------------------------------------------------------------------------------------------------------------------------------------------------------------------------------------------------|-------------------------------------------------------------------------------------------|
| Mean age (SD): NR (NR)<br>Median age (range): 59.3 (46.0, 77.5)                                                                                                                                                                                                                                               | Mean age (SD): NR (NR)<br>Median age (range): 57.3 (36.0, 79.0)                           |
| Ethnicity: NR                                                                                                                                                                                                                                                                                                 | Ethnicity: NR                                                                             |
| Gleason score: ≤6 (21.9); 7 (34.4); 8-10 (43.8); unknown (0)                                                                                                                                                                                                                                                  | Gleason score: ≤6 (44.1); 7 (35.1); 8-10 (18.5); unknown (2.3)                            |
| AJCC stage: I (12.5); IIa (6.3); IIb (18.8); III (37.5); IV (25.0)                                                                                                                                                                                                                                            | AJCC stage: I (19.7); IIa (19.3); IIb (22.0); III (33.5); IV (5.4)                        |
| TNM stage: NR                                                                                                                                                                                                                                                                                                 | TNM stage: NR                                                                             |
| ECOG score<br>0: NR<br>1: NR<br>0-1: NR<br>≥2: NR                                                                                                                                                                                                                                                             | ECOG score<br>0: NR<br>1: NR<br>0-1: NR<br>≥2: NR                                         |
| Previous treatments: ADT (84.4)                                                                                                                                                                                                                                                                               | Previous treatments: ADT (77.7)                                                           |
| Familial history of PC: NR                                                                                                                                                                                                                                                                                    | Familial history of PC: NR                                                                |
| Mean years since diagnosis (SD): NR (NR)<br>Median years since diagnosis (range): NR (NR)                                                                                                                                                                                                                     | Mean years since diagnosis (SD): NR (NR)<br>Median years since diagnosis (range): NR (NR) |
| Mean PSA ng/ml (SD): NR (NR)<br>Median PSA ng/ml (range): 19.4 (2.1, 68.5)                                                                                                                                                                                                                                    | Mean PSA ng/ml (SD): NR (NR)<br>Median PSA ng/ml (range): 13.9 (1.2, 143.0)               |
| ADT, androgen deprivation therapy; AJCC, American Joint Committee on Cancer; DDR, DNA damage repair; ECOG, Eastern Cooperative Oncology Group; NR, not reported; PC, prostate cancer; PSA, prostate-specific antigen; SD, standard deviation; TNM, Tumor Nodes Metastasis classification of malignant tumors. |                                                                                           |

|                                          |
|------------------------------------------|
| <b>Cesaretti <i>et al</i>, 2007 (41)</b> |
| USA                                      |



|                                                                                                                                                       |
|-------------------------------------------------------------------------------------------------------------------------------------------------------|
| PC. Diagnosis: Biopsy and Histology                                                                                                                   |
| Other details (Patients were staged according to the 1992 American Joint Committee on Cancer standard and had biopsy-proven prostatic adenocarcinoma) |
| Population (further details): treatment (Brachytherapy)                                                                                               |
| Treatment (further details): Brachytherapy (125I implant, a 103Pd implant, or the combination of external beam radiotherapy with a 103Pd implant)     |
| Total (n=108)                                                                                                                                         |
| Mean age (SD): NR (NR)                                                                                                                                |
| Median age (range): 64 (46, 79)                                                                                                                       |
| Ethnicity: NR                                                                                                                                         |
| Gleason score: 5 (5); 6 (81); 7 (12); 8-10 (3)                                                                                                        |
| AJCC stage: NR                                                                                                                                        |
| TNM stage: T1b (1); T1c (59); T2a (20); T2b (15); T2c (4); T recurrent after 70 Gy in 1996 (1)                                                        |
| ECOG score                                                                                                                                            |
| 0: NR                                                                                                                                                 |
| 1: NR                                                                                                                                                 |
| 0-1: NR                                                                                                                                               |
| ≥2: NR                                                                                                                                                |
| Previous treatments: NR                                                                                                                               |
| Familial history of PC: NR                                                                                                                            |
| Mean years since diagnosis (SD): NR (NR)                                                                                                              |
| Median years since diagnosis (range): NR (NR)                                                                                                         |

|                                                                                                                                                                                                                                                    |
|----------------------------------------------------------------------------------------------------------------------------------------------------------------------------------------------------------------------------------------------------|
| Mean PSA ng/ml (SD): NR (NR)                                                                                                                                                                                                                       |
| Median PSA ng/ml (range): 6.1 (0.8, 41)                                                                                                                                                                                                            |
| AJCC, American Joint Committee on Cancer; ECOG, Eastern Cooperative Oncology Group; NR, not reported; PC, prostate cancer; PSA, prostate-specific antigen; SD, standard deviation; TNM, Tumor Nodes Metastasis classification of malignant tumors. |

|                                                                                           |
|-------------------------------------------------------------------------------------------|
| <b>Cheng <i>et al</i>, 2011 (23)</b>                                                      |
| Australia                                                                                 |
| PC. Diagnosis: Histology                                                                  |
| Other details (NR)                                                                        |
| Population (further details): familial (PC patients from familial breast cancer families) |
| Treatment (further details): NR (NR)                                                      |
| Total (n=147)                                                                             |
| Mean age (SD): NR (NR)                                                                    |
| Median age (range): NR (NR)                                                               |
| Ethnicity: NR                                                                             |
| Gleason score: NR                                                                         |
| AJCC stage: NR                                                                            |
| TNM stage: NR                                                                             |
| ECOG score                                                                                |
| 0: NR                                                                                     |
| 1: NR                                                                                     |
| 0-1: NR                                                                                   |
| ≥2: NR                                                                                    |

|                                                                                                                                                                                                                                                    |
|----------------------------------------------------------------------------------------------------------------------------------------------------------------------------------------------------------------------------------------------------|
| Previous treatments: NR                                                                                                                                                                                                                            |
| Familial history of PC: NR                                                                                                                                                                                                                         |
| Mean years since diagnosis (SD): NR (NR)                                                                                                                                                                                                           |
| Median years since diagnosis (range): NR (NR)                                                                                                                                                                                                      |
| Mean PSA ng/ml (SD): NR (NR)                                                                                                                                                                                                                       |
| Median PSA ng/ml (range): NR (NR)                                                                                                                                                                                                                  |
| Comments: Data apparently recorded but not presented in abstract                                                                                                                                                                                   |
| AJCC, American Joint Committee on Cancer; ECOG, Eastern Cooperative Oncology Group; NR, not reported; PC, prostate cancer; PSA, prostate-specific antigen; SD, standard deviation; TNM, Tumor Nodes Metastasis classification of malignant tumors. |

|                                                                                                                                                                                                                                                                                                   |
|---------------------------------------------------------------------------------------------------------------------------------------------------------------------------------------------------------------------------------------------------------------------------------------------------|
| Chi <i>et al</i> , 2017 (42)                                                                                                                                                                                                                                                                      |
| Canada                                                                                                                                                                                                                                                                                            |
| mCRPC. Diagnosis: Biopsy histology; PSA; bone or CT scan                                                                                                                                                                                                                                          |
| Other details (NR)                                                                                                                                                                                                                                                                                |
| Population (further details): unselected (NR)                                                                                                                                                                                                                                                     |
| Treatment (further details): Mixed (Abiraterone [Abi] acetate 1000 mg PO OD with prednisone 5 mg PO BID or 10 mg OD as per standard of care, or until PSA progression then cross-over to ENZ; enzalutamide 160 mg PO OD as per standard of care, or until PSA progression then cross-over to Abi) |
| Total (n=NR)                                                                                                                                                                                                                                                                                      |
| Mean age (SD): NR (NR)                                                                                                                                                                                                                                                                            |
| Median age (range): 75 (49, 74)                                                                                                                                                                                                                                                                   |
| Ethnicity: NR                                                                                                                                                                                                                                                                                     |
| Gleason score: NR                                                                                                                                                                                                                                                                                 |

|                                                                                                                                                                                                                                                                                                                                                            |
|------------------------------------------------------------------------------------------------------------------------------------------------------------------------------------------------------------------------------------------------------------------------------------------------------------------------------------------------------------|
| AJCC stage: NR                                                                                                                                                                                                                                                                                                                                             |
| TNM stage: NR                                                                                                                                                                                                                                                                                                                                              |
| ECOG score<br>0: NR<br>1: NR<br>0-1: NR (83)<br>≥2: NR                                                                                                                                                                                                                                                                                                     |
| Previous treatments: None                                                                                                                                                                                                                                                                                                                                  |
| Familial history of PC: NR                                                                                                                                                                                                                                                                                                                                 |
| Mean years since diagnosis (SD): NR (NR)<br>Median years since diagnosis (range): NR (NR)                                                                                                                                                                                                                                                                  |
| Mean PSA ng/ml (SD): 36.1 (NR)<br>Median PSA ng/ml (range): NR (1.7, 2817)                                                                                                                                                                                                                                                                                 |
| AJCC, American Joint Committee on Cancer; BID, twice daily; CRPC, castration-resistant PC; CT, computed tomography; ECOG, Eastern Cooperative Oncology Group; NR, not reported; OD, once daily; PC, prostate cancer; PO, per oral; PSA, prostate-specific antigen; SD, standard deviation; TNM, Tumor Nodes Metastasis classification of malignant tumors. |

|                                                      |
|------------------------------------------------------|
| <b>Dall'Era <i>et al</i>, 2017 (8)</b>               |
| USA                                                  |
| Primary PC; mPC. Diagnosis: NR<br>Other details (NR) |
| Population (further details): treatment (NR)         |
| Treatment (further details): NR (NR)                 |

|                                                                                                                                                                                                                                                                                                  |
|--------------------------------------------------------------------------------------------------------------------------------------------------------------------------------------------------------------------------------------------------------------------------------------------------|
| Total (n=936)                                                                                                                                                                                                                                                                                    |
| Mean age (SD): NR (NR)                                                                                                                                                                                                                                                                           |
| Median age (range): NR (NR)                                                                                                                                                                                                                                                                      |
| Ethnicity: NR                                                                                                                                                                                                                                                                                    |
| Gleason score: NR                                                                                                                                                                                                                                                                                |
| AJCC stage: NR                                                                                                                                                                                                                                                                                   |
| TNM stage: NR                                                                                                                                                                                                                                                                                    |
| ECOG score<br>0: NR<br>1: NR<br>0-1: NR<br>≥2: NR                                                                                                                                                                                                                                                |
| Previous treatments: NR                                                                                                                                                                                                                                                                          |
| Familial history of PC: NR                                                                                                                                                                                                                                                                       |
| Mean years since diagnosis (SD): NR (NR)                                                                                                                                                                                                                                                         |
| Median years since diagnosis (range): NR (NR)                                                                                                                                                                                                                                                    |
| Mean PSA ng/ml (SD): NR (NR)                                                                                                                                                                                                                                                                     |
| Median PSA ng/ml (range): NR (NR)                                                                                                                                                                                                                                                                |
| Comments: Very limited patient characteristics provided                                                                                                                                                                                                                                          |
| AJCC, American Joint Committee on Cancer; ECOG, Eastern Cooperative Oncology Group; m, metastatic; NR, not reported; PC, prostate cancer; PSA, prostate-specific antigen; SD, standard deviation; TNM, Tumor Nodes Metastasis classification of malignant tumors; USA, United States of America. |

|                                                                                                                                                                                                                                                                                                                                                                                                                                                                                    |
|------------------------------------------------------------------------------------------------------------------------------------------------------------------------------------------------------------------------------------------------------------------------------------------------------------------------------------------------------------------------------------------------------------------------------------------------------------------------------------|
| <b>Damaraju <i>et al</i>, 2006 (26)</b>                                                                                                                                                                                                                                                                                                                                                                                                                                            |
| Canada                                                                                                                                                                                                                                                                                                                                                                                                                                                                             |
| Primary PC. Diagnosis: Biopsy with T classification, staging bone scan and CT scan                                                                                                                                                                                                                                                                                                                                                                                                 |
| Other details (NR)                                                                                                                                                                                                                                                                                                                                                                                                                                                                 |
| Population (further details): treatment (3-DCRT)                                                                                                                                                                                                                                                                                                                                                                                                                                   |
| Treatment (further details): 3-DCRT (The clinical target volume (prostatic tissue containing biopsy-proven adenocarcinoma or its suspected microscopic extensions) received a mean dose of 77.1 Gy (range, 68.3-82.1 Gy) in five daily fractions per week. The number of fractions ranged from 35 to to 44, and in all patients, the planning target volume received a minimum dose per fraction of 1.8 to 2 Gy. Pelvic lymph nodes were not treated by intention in any patient). |
| Total (n=83)                                                                                                                                                                                                                                                                                                                                                                                                                                                                       |
| Mean age (SD): 67 (NR)                                                                                                                                                                                                                                                                                                                                                                                                                                                             |
| Median age (range): NR (45, 78)                                                                                                                                                                                                                                                                                                                                                                                                                                                    |
| Ethnicity: Caucasian (86%); Caucasian French-Canadian (7%); Aboriginal (4%); Pacific Asian (2%); Afro-Caribbean (1%)                                                                                                                                                                                                                                                                                                                                                               |
| Gleason score: NR                                                                                                                                                                                                                                                                                                                                                                                                                                                                  |
| AJCC stage: NR                                                                                                                                                                                                                                                                                                                                                                                                                                                                     |
| TNM stage: T1 (22); T2 ( 53); T3 (24); Tx (1)                                                                                                                                                                                                                                                                                                                                                                                                                                      |
| ECOG score<br>0: NR<br>1: NR<br>0-1: NR<br>≥2: NR                                                                                                                                                                                                                                                                                                                                                                                                                                  |
| Previous treatments: Abdominopelvic surgery (n=30; 36%); neoadjuvant hormone therapy (n=35; 42%; adjuvant hormone therapy (n=6; 7%).                                                                                                                                                                                                                                                                                                                                               |
| Familial history of PC: NR                                                                                                                                                                                                                                                                                                                                                                                                                                                         |

|                                                                                                                                                                                                                                                                                                                                         |
|-----------------------------------------------------------------------------------------------------------------------------------------------------------------------------------------------------------------------------------------------------------------------------------------------------------------------------------------|
| Mean years since diagnosis (SD): NR (NR)                                                                                                                                                                                                                                                                                                |
| Median years since diagnosis (range): NR (NR)                                                                                                                                                                                                                                                                                           |
| Mean PSA ng/ml (SD): 11.8 (NR)                                                                                                                                                                                                                                                                                                          |
| Median PSA ng/ml (range): NR (0.2, 74.0)                                                                                                                                                                                                                                                                                                |
| AJCC, American Joint Committee on Cancer; CT, computed tomography; ECOG, Eastern Cooperative Oncology Group; NR, not reported; PC, prostate cancer; PSA, prostate-specific antigen; SD, standard deviation; TNM, Tumor Nodes Metastasis classification of malignant tumors; 3-DCRT, three dimensional conformational radiation therapy. |

|                                                                                                          |
|----------------------------------------------------------------------------------------------------------|
| <b>Daniel <i>et al</i>, 2017 (9)</b>                                                                     |
| USA                                                                                                      |
| mCRPC. Diagnosis: NR                                                                                     |
| Other details (predominantly relapsed, refractory or metastatic prostate carcinoma (mPC + CRPC + mCRPC)) |
| Population (further details): unselected (NR)                                                            |
| Treatment (further details): NR (NR)                                                                     |
| Total (n=1911)                                                                                           |
| Mean age (SD): NR (NR)                                                                                   |
| Median age (range): NR (NR)                                                                              |
| Ethnicity: NR                                                                                            |
| Gleason score: NR                                                                                        |
| AJCC stage: NR                                                                                           |
| TNM stage: NR                                                                                            |

|                                                                                                                                                                                                                                                                                                                                 |
|---------------------------------------------------------------------------------------------------------------------------------------------------------------------------------------------------------------------------------------------------------------------------------------------------------------------------------|
| ECOG score                                                                                                                                                                                                                                                                                                                      |
| 0: NR                                                                                                                                                                                                                                                                                                                           |
| 1: NR                                                                                                                                                                                                                                                                                                                           |
| 0-1: NR                                                                                                                                                                                                                                                                                                                         |
| ≥2: NR                                                                                                                                                                                                                                                                                                                          |
| Previous treatments: NR                                                                                                                                                                                                                                                                                                         |
| Familial history of PC: NR                                                                                                                                                                                                                                                                                                      |
| Mean years since diagnosis (SD): NR (NR)                                                                                                                                                                                                                                                                                        |
| Median years since diagnosis (range): NR (NR)                                                                                                                                                                                                                                                                                   |
| Mean PSA ng/ml (SD): NR (NR)                                                                                                                                                                                                                                                                                                    |
| Median PSA ng/ml (range): NR (NR)                                                                                                                                                                                                                                                                                               |
| Comments: no details                                                                                                                                                                                                                                                                                                            |
| AJCC, American Joint Committee on Cancer; CRPC, castration-resistant PC; ECOG, Eastern Cooperative Oncology Group; m, metastatic; NR, not reported; PC, prostate cancer; PSA, prostate-specific antigen; SD, standard deviation; TNM, Tumor Nodes Metastasis classification of malignant tumors; USA, United States of America. |

|                                               |
|-----------------------------------------------|
| <b>Dawson <i>et al</i>, 2016 (11)</b>         |
| USA                                           |
| PC. Diagnosis: NR                             |
| Other details (NR)                            |
| Population (further details): unselected (NR) |
| Treatment (further details): NR (NR)          |
| Total (n=437)                                 |



|                                                                                                                                                                                                                                                                                   |
|-----------------------------------------------------------------------------------------------------------------------------------------------------------------------------------------------------------------------------------------------------------------------------------|
| Mean age (SD): NR (NR)<br>Median age (range): 67 (NR)                                                                                                                                                                                                                             |
| Ethnicity: NR                                                                                                                                                                                                                                                                     |
| Gleason score: NR                                                                                                                                                                                                                                                                 |
| AJCC stage: NR                                                                                                                                                                                                                                                                    |
| TNM stage: NR                                                                                                                                                                                                                                                                     |
| ECOG score<br>0: NR<br>1: NR<br>0-1: NR<br>≥2: NR                                                                                                                                                                                                                                 |
| Previous treatments: NR                                                                                                                                                                                                                                                           |
| Familial history of PC: NR                                                                                                                                                                                                                                                        |
| Mean years since diagnosis (SD): NR (NR)<br>Median years since diagnosis (range): NR (NR)                                                                                                                                                                                         |
| Mean PSA ng/ml (SD): NR (NR)<br>Median PSA ng/ml (range): NR (NR)                                                                                                                                                                                                                 |
| AJCC, American Joint Committee on Cancer; ECOG, Eastern Cooperative Oncology Group; NR, not reported; PC, prostate cancer; PSA, prostate-specific antigen; SD, standard deviation; TNM, Tumor Nodes Metastasis classification of malignant tumors; USA, United States of America. |

|                                       |
|---------------------------------------|
| <b>Decker <i>et al</i>, 2016 (43)</b> |
| Multinational                         |

|                                                               |                                               |                                               |
|---------------------------------------------------------------|-----------------------------------------------|-----------------------------------------------|
| PC and mCRPC. Diagnosis: Histology                            |                                               |                                               |
| Other details (NR)                                            |                                               |                                               |
| Population (further details): unselected (NR)                 |                                               |                                               |
| Treatment (further details): radical prostatectomy or NR (NR) |                                               |                                               |
| PC USA (n=10)                                                 | PC Multinational (Australia; USA) (n=50)      | mCRPC Multinational (USA, UK, Israel) (n=150) |
| Mean age (SD): 63.6 (NR)                                      | Mean age (SD): NR (NR)                        | Mean age (SD): NR (NR)                        |
| Median age (range): NR (54, 77)                               | Median age (range): NR (NR)                   | Median age (range): NR (NR)                   |
| Ethnicity: European descent (100)                             | Ethnicity: NR                                 | Ethnicity: NR                                 |
| Gleason score: 7 (10); 8 (20); 9 (60); 10 (10)                | Gleason score: <7 (70); 8-10 (22); NR (8)     | Gleason score: NR                             |
| AJCC stage: NR                                                | AJCC stage: NR                                | AJCC stage: NR                                |
| TNM stage: NR                                                 | TNM stage: NR                                 | TNM stage: NR                                 |
| ECOG score                                                    | ECOG score                                    | ECOG score                                    |
| 0: NR                                                         | 0: NR                                         | 0: NR                                         |
| 1: NR                                                         | 1: NR                                         | 1: NR                                         |
| 0-1: NR                                                       | 0-1: NR                                       | 0-1: NR                                       |
| ≥2: NR                                                        | ≥2: NR                                        | ≥2: NR                                        |
| Previous treatments: radical prostatectomy (100)              | Previous treatments: treatment naïve (100)    | Previous treatments: NR                       |
| Familial history of PC: 2 (20)                                | Familial history of PC: NR                    | Familial history of PC: NR                    |
| Mean years since diagnosis (SD): NR (NR)                      | Mean years since diagnosis (SD): NR (NR)      | Mean years since diagnosis (SD): NR (NR)      |
| Median years since diagnosis (range): NR (NR)                 | Median years since diagnosis (range): NR (NR) | Median years since diagnosis (range): NR (NR) |

|                                                                                                                                                                                                                                                                                                                                                                      |                                                          |                                                                      |
|----------------------------------------------------------------------------------------------------------------------------------------------------------------------------------------------------------------------------------------------------------------------------------------------------------------------------------------------------------------------|----------------------------------------------------------|----------------------------------------------------------------------|
| Mean PSA ng/ml (SD): 11.6 (NR)                                                                                                                                                                                                                                                                                                                                       | Mean PSA ng/ml (SD): NR (NR)                             | Mean PSA ng/ml (SD): NR (NR)                                         |
| Median PSA ng/ml (range): NR (4.4, 22.3)                                                                                                                                                                                                                                                                                                                             | Median PSA ng/ml (range): NR (NR)                        | Median PSA ng/ml (range): NR (NR)                                    |
| Comments: Original study cohort of ten patients from the Mayo clinic                                                                                                                                                                                                                                                                                                 | Comments: Reference study of 50 patients from Baca et al | Comments: Second reference study of 150 patients from Robinson et al |
| AJCC, American Joint Committee on Cancer; CRPC, castration-resistant PC; ECOG, Eastern Cooperative Oncology Group; m, metastatic; IV, intravenous; NR, not reported; PC, prostate cancer; PSA, prostate-specific antigen; SD, standard deviation; TNM, Tumor Nodes Metastasis classification of malignant tumors; UK, United Kingdom; USA, United States of America. |                                                          |                                                                      |

|                                                    |
|----------------------------------------------------|
| <b>Edwards <i>et al</i>, 2003 (44)</b>             |
| UK                                                 |
| Other. Diagnosis: <55, no further details          |
| Other details (Young onset)                        |
| Population (further details): unselected (NR)      |
| Treatment (further details): NR (NR)               |
| Total (n=263)                                      |
| Mean age (SD): 51 (NR)                             |
| Median age (range): NR (32, 55)                    |
| Ethnicity: White (96); Black African/Caribbean (4) |
| Gleason score: NR                                  |
| AJCC stage: NR                                     |
| TNM stage: NR                                      |

|                                                                                                                                                                                                                                                                        |
|------------------------------------------------------------------------------------------------------------------------------------------------------------------------------------------------------------------------------------------------------------------------|
| ECOG score<br>0: NR<br>1: NR<br>0-1: NR<br>≥2: NR                                                                                                                                                                                                                      |
| Previous treatments: NR                                                                                                                                                                                                                                                |
| Familial history of PC: NR                                                                                                                                                                                                                                             |
| Mean years since diagnosis (SD): NR (NR)<br>Median years since diagnosis (range): NR (NR)                                                                                                                                                                              |
| Mean PSA ng/ml (SD): NR (NR)<br>Median PSA ng/ml (range): NR (NR)                                                                                                                                                                                                      |
| AJCC, American Joint Committee on Cancer; ECOG, Eastern Cooperative Oncology Group; NR, not reported; PC, prostate cancer; PSA, prostate-specific antigen; SD, standard deviation; TNM, Tumor Nodes Metastasis classification of malignant tumors; UK, United Kingdom. |

|                                                         |                         |                          |                                     |
|---------------------------------------------------------|-------------------------|--------------------------|-------------------------------------|
| <b>Evans <i>et al</i>, 2016 (45)</b>                    |                         |                          |                                     |
| USA                                                     |                         |                          |                                     |
| PC. Diagnosis: NR<br>Other details (high risk)          |                         |                          |                                     |
| Population (further details): unselected (NR)           |                         |                          |                                     |
| Treatment (further details): radical prostatectomy (NR) |                         |                          |                                     |
| Mayo discovery (n=545)                                  | Mayo validation (n=232) | Cleveland clinic (n=130) | Thomas Jefferson University (n=183) |

|                                                                                                       |                                                                                                       |                                                                                                      |                                                                                                       |
|-------------------------------------------------------------------------------------------------------|-------------------------------------------------------------------------------------------------------|------------------------------------------------------------------------------------------------------|-------------------------------------------------------------------------------------------------------|
| Mean age (SD): 65.3 (6.4)<br>Median age (range): NR (NR)                                              | Mean age (SD): 63.1 (7.4)<br>Median age (range): NR (NR)                                              | Mean age (SD): 61.6 (6.3)<br>Median age (range): NR (NR)                                             | Mean age (SD): 60 (7)<br>Median age (range): NR (NR)                                                  |
| Ethnicity: NR                                                                                         | Ethnicity: NR                                                                                         | Ethnicity: NR                                                                                        | Ethnicity: NR                                                                                         |
| Gleason score: 6 (11); 7 (49); 8 (13); 9 (24); 10 (2); NA (1)                                         | Gleason score: 6 (7); 7 (50); 8 (17); 9 (25); 10 (1); NA (1)                                          | Gleason score: 6 (17); 7 (62); 8 (13); 9 (12); 10 (0); NA (0)                                        | Gleason score: 6 (13); 7 (57); 8 (17); 9 (10); 10 (1.5); NA (1.5)                                     |
| AJCC stage: I (0); II (40); III (46); IV (0); NA (13)                                                 | AJCC stage: I (0); II (42); III (44); IV (0); NA (14)                                                 | AJCC stage: NA (100)                                                                                 | AJCC stage: I (0); II (8); III (87); IV (5); NA (0)                                                   |
| TNM stage: NR                                                                                         | TNM stage: NR                                                                                         | TNM stage: NR                                                                                        | TNM stage: NR                                                                                         |
| ECOG score<br>0: NR<br>1: NR<br>0-1: NR<br>≥2: NR                                                     | ECOG score<br>0: NR<br>1: NR<br>0-1: NR<br>≥2: NR                                                     | ECOG score<br>0: NR<br>1: NR<br>0-1: NR<br>≥2: NR                                                    | ECOG score<br>0: NR<br>1: NR<br>0-1: NR<br>≥2: NR                                                     |
| Previous treatments: NR                                                                               | Previous treatments: NR                                                                               | Previous treatments: NR                                                                              | Previous treatments: NR                                                                               |
| Familial history of PC: NR                                                                            | Familial history of PC: NR                                                                            | Familial history of PC: NR                                                                           | Familial history of PC: NR                                                                            |
| Mean years since diagnosis (SD): NR (NR)<br>Median years since diagnosis (range): NR (NR)             | Mean years since diagnosis (SD): NR (NR)<br>Median years since diagnosis (range): NR (NR)             | Mean years since diagnosis (SD): NR (NR)<br>Median years since diagnosis (range): NR (NR)            | Mean years since diagnosis (SD): NR (NR)<br>Median years since diagnosis (range): NR (NR)             |
| Mean PSA ng/ml (SD): NR (NR)<br>Median PSA ng/ml (range): NR (<10 (52); 10-20 (22); >20 (24); NA (3)) | Mean PSA ng/ml (SD): NR (NR)<br>Median PSA ng/ml (range): NR (<10 (54); 10-20 (27); >20 (19); NA (0)) | Mean PSA ng/ml (SD): NR (NR)<br>Median PSA ng/ml (range): NR (<10 (69); 10-20 (23); >20 (7); NA (1)) | Mean PSA ng/ml (SD): NR (NR)<br>Median PSA ng/ml (range): NR (<10 (64); 10-20 (19); >20 (11); NA (5)) |

AJCC, American Joint Committee on Cancer; ECOG, Eastern Cooperative Oncology Group; NA, not available; NR, not reported; PC, prostate cancer; PSA, prostate-specific antigen; SD, standard deviation; TNM, Tumor Nodes Metastasis classification of malignant tumors; USA, United States of America.

|                                                                                                              |
|--------------------------------------------------------------------------------------------------------------|
| <b>Fachal <i>et al</i>, 2012 (46)</b>                                                                        |
| Spain                                                                                                        |
| PC. Diagnosis: NR<br>Other details (NR)                                                                      |
| Population (further details): treatment (Three-dimensional conformational radiotherapy (3D-CRT))             |
| Treatment (further details): Three-dimensional conformational radiotherapy (3D-CRT) (1.8-2 Gy/fraction)      |
| Total (n=698)                                                                                                |
| Mean age (SD): 71 (NR)<br>Median age (range): NR (47, 86)                                                    |
| Ethnicity: NR                                                                                                |
| Gleason score: 2-4 (10.03); 5-6 (51.58); 7 (26.65); 8-10 (10.17); missing (1.58)                             |
| AJCC stage: NR                                                                                               |
| TNM stage: $\leq$ cT2a (33.1); cT2b (22.4); cT2c (15.5); cT3 (8.3); cT4 (1); recurrent (18.9); Missing (0.9) |
| ECOG score<br>0: NR<br>1: NR<br>0-1: NR<br>$\geq$ 2: NR                                                      |
| Previous treatments: radiotherapy; prostatectomy (15.9%)                                                     |

|                                                                                                                                                                                                                                                                                 |
|---------------------------------------------------------------------------------------------------------------------------------------------------------------------------------------------------------------------------------------------------------------------------------|
| Familial history of PC: NR                                                                                                                                                                                                                                                      |
| Mean years since diagnosis (SD): NR (NR)                                                                                                                                                                                                                                        |
| Median years since diagnosis (range): NR (NR)                                                                                                                                                                                                                                   |
| Mean PSA ng/ml (SD): 15.95 (NR)                                                                                                                                                                                                                                                 |
| Median PSA ng/ml (range): NR (0.63, 236)                                                                                                                                                                                                                                        |
| Comments: patients with radical radiotherapy received a total dose for the PTV I that ranged from 70 to 76 Gy, as well as 56 Gy for the PTV II and 46 Gy for PTV III                                                                                                            |
| AJCC, American Joint Committee on Cancer; ECOG, Eastern Cooperative Oncology Group; NR, not reported; PC, prostate cancer; PSA, prostate-specific antigen; SD, standard deviation; PTV, planning target volume; TNM, Tumor Nodes Metastasis classification of malignant tumors. |

|                                               |
|-----------------------------------------------|
| <b>Feldman <i>et al</i>, 2014 (10)</b>        |
| USA                                           |
| PC. Diagnosis: Histology                      |
| Other details (NR)                            |
| Population (further details): unselected (NR) |
| Treatment (further details): NR (NR)          |
| Total (n=330)                                 |
| Mean age (SD): NR (NR)                        |
| Median age (range): NR (NR)                   |
| Ethnicity: NR                                 |
| Gleason score: NR                             |
| AJCC stage: NR                                |

|                                                                                                                                                                                                                                                    |
|----------------------------------------------------------------------------------------------------------------------------------------------------------------------------------------------------------------------------------------------------|
| TNM stage: NR                                                                                                                                                                                                                                      |
| ECOG score<br>0: NR<br>1: NR<br>0-1: NR<br>≥2: NR                                                                                                                                                                                                  |
| Previous treatments: NR                                                                                                                                                                                                                            |
| Familial history of PC: NR                                                                                                                                                                                                                         |
| Mean years since diagnosis (SD): NR (NR)<br>Median years since diagnosis (range): NR (NR)                                                                                                                                                          |
| Mean PSA ng/ml (SD): NR (NR)<br>Median PSA ng/ml (range): NR (NR)                                                                                                                                                                                  |
| Comments: no details                                                                                                                                                                                                                               |
| AJCC, American Joint Committee on Cancer; ECOG, Eastern Cooperative Oncology Group; NR, not reported; PC, prostate cancer; PSA, prostate-specific antigen; SD, standard deviation; TNM, Tumor Nodes Metastasis classification of malignant tumors. |

|                                                                                                                |
|----------------------------------------------------------------------------------------------------------------|
| <b>Fontugne <i>et al</i>, 2015 (47)</b>                                                                        |
| Multinational                                                                                                  |
| PC. Diagnosis: NR<br>Other details (Mixed population of patients with a spectrum of localized and advanced PC) |
| Population (further details): unselected (NR)                                                                  |
| Treatment (further details): NR (NR)                                                                           |
| Total (n=51)                                                                                                   |



|                                                                                                                                                                                                                                                    |
|----------------------------------------------------------------------------------------------------------------------------------------------------------------------------------------------------------------------------------------------------|
| Mean age (SD): NR (NR)                                                                                                                                                                                                                             |
| Median age (range): NR (NR)                                                                                                                                                                                                                        |
| Ethnicity: NR                                                                                                                                                                                                                                      |
| Gleason score: NR                                                                                                                                                                                                                                  |
| AJCC stage: NR                                                                                                                                                                                                                                     |
| TNM stage: NR                                                                                                                                                                                                                                      |
| ECOG score<br>0: NR<br>1: NR<br>0-1: NR<br>≥2: NR                                                                                                                                                                                                  |
| Previous treatments: NR                                                                                                                                                                                                                            |
| Familial history of PC: NR                                                                                                                                                                                                                         |
| Mean years since diagnosis (SD): NR (NR)                                                                                                                                                                                                           |
| Median years since diagnosis (range): NR (NR)                                                                                                                                                                                                      |
| Mean PSA ng/ml (SD): NR (NR)                                                                                                                                                                                                                       |
| Median PSA ng/ml (range): NR (NR)                                                                                                                                                                                                                  |
| Comments: 69 tumors from 51 patients analyzed                                                                                                                                                                                                      |
| AJCC, American Joint Committee on Cancer; ECOG, Eastern Cooperative Oncology Group; NR, not reported; PC, prostate cancer; PSA, prostate-specific antigen; SD, standard deviation; TNM, Tumor Nodes Metastasis classification of malignant tumors. |

|                                          |
|------------------------------------------|
| <b>Gallagher <i>et al</i>, 2012 (48)</b> |
| USA                                      |

|                                                                                                                                                                                                                                                                                                                                                                                                                                                                                                                                                                                                                                 |                                                                                                                                                       |
|---------------------------------------------------------------------------------------------------------------------------------------------------------------------------------------------------------------------------------------------------------------------------------------------------------------------------------------------------------------------------------------------------------------------------------------------------------------------------------------------------------------------------------------------------------------------------------------------------------------------------------|-------------------------------------------------------------------------------------------------------------------------------------------------------|
| CRPC. Diagnosis: Pathology                                                                                                                                                                                                                                                                                                                                                                                                                                                                                                                                                                                                      |                                                                                                                                                       |
| Other details (NR)                                                                                                                                                                                                                                                                                                                                                                                                                                                                                                                                                                                                              |                                                                                                                                                       |
| Population (further details): Ashkenazi (NR)                                                                                                                                                                                                                                                                                                                                                                                                                                                                                                                                                                                    |                                                                                                                                                       |
| Treatment (further details): Mixed treatment (For the total population, treatment was reported for 76 taxanes based therapies: single-agent docetaxel (n=33 patients), docetaxel + estramustine (17 patients), docetaxel + samarium (five patients), docetaxel + bevacizumab (four patients), docetaxel + 17AAG (two patients), docetaxel + DN-101 (two patients), docetaxel + carboplatin (one patient), docetaxel + traztususumab (one patient), docetaxel + cyclophosphamide (one patient), paclitaxel (three patients), paclitaxel + carboplatin + estramustine (six patients) and paclitaxel + estramustine (one patient). |                                                                                                                                                       |
| DDR+ (n=7)                                                                                                                                                                                                                                                                                                                                                                                                                                                                                                                                                                                                                      | DDR- (n=81)                                                                                                                                           |
| Mean age (SD): NR (NR)                                                                                                                                                                                                                                                                                                                                                                                                                                                                                                                                                                                                          | Mean age (SD): NR (NR)                                                                                                                                |
| Median age (range): 72 (59, 82)                                                                                                                                                                                                                                                                                                                                                                                                                                                                                                                                                                                                 | Median age (range): 75 (69, 79)                                                                                                                       |
| Ethnicity: Jewish (100)                                                                                                                                                                                                                                                                                                                                                                                                                                                                                                                                                                                                         | Ethnicity: Jewish (100)                                                                                                                               |
| Gleason score: ≤ 6 (14); 7 (43); 8 (0); 9 (44); unknown (0)                                                                                                                                                                                                                                                                                                                                                                                                                                                                                                                                                                     | Gleason score: ≤ 6 (16); 7 (35); 8 (23); 9 (23); unknown (2)                                                                                          |
| AJCC stage: NR                                                                                                                                                                                                                                                                                                                                                                                                                                                                                                                                                                                                                  | AJCC stage: NR                                                                                                                                        |
| TNM stage: T1 (14); T2 (43); T3 (29); T4 (0); unknown (14)                                                                                                                                                                                                                                                                                                                                                                                                                                                                                                                                                                      | TNM stage: T1 (14); T2 (26); T3 (27); T4 (4); unknown (30)                                                                                            |
| ECOG score<br>0: NR<br>1: NR<br>0-1: NR<br>≥2: NR                                                                                                                                                                                                                                                                                                                                                                                                                                                                                                                                                                               | ECOG score<br>0: NR<br>1: NR<br>0-1: NR<br>≥2: NR                                                                                                     |
| Previous treatments: Prostatectomy (43); Radiotherapy alone (14); Radiotherapy + ADT (29); Hormones alone (14); Watchful waiting (0); Chemotherapy (0)                                                                                                                                                                                                                                                                                                                                                                                                                                                                          | Previous treatments: Prostatectomy (48); Radiotherapy alone (27); Radiotherapy + ADT (15); Hormones alone (9); Watchful waiting (4); Chemotherapy (1) |
| Familial history of PC: NR                                                                                                                                                                                                                                                                                                                                                                                                                                                                                                                                                                                                      | Familial history of PC: NR                                                                                                                            |

|                                                                                                                                                                                                                                                                                                                                                     |                                               |
|-----------------------------------------------------------------------------------------------------------------------------------------------------------------------------------------------------------------------------------------------------------------------------------------------------------------------------------------------------|-----------------------------------------------|
| Mean years since diagnosis (SD): NR (NR)                                                                                                                                                                                                                                                                                                            | Mean years since diagnosis (SD): NR (NR)      |
| Median years since diagnosis (range): NR (NR)                                                                                                                                                                                                                                                                                                       | Median years since diagnosis (range): NR (NR) |
| Mean PSA ng/ml (SD): NR (NR)                                                                                                                                                                                                                                                                                                                        | Mean PSA ng/ml (SD): NR (NR)                  |
| Median PSA ng/ml (range): 199 (3, 811)                                                                                                                                                                                                                                                                                                              | Median PSA ng/ml (range): 73 (18, 262)        |
| ADT, androgen deprivation therapy; AJCC, American Joint Committee on Cancer; CRPC, castration-resistant PC; ECOG, Eastern Cooperative Oncology Group; NR, not reported; PC, prostate cancer; PSA, prostate-specific antigen; SD, standard deviation; TNM, Tumor Nodes Metastasis classification of malignant tumors; USA, United States of America. |                                               |

|                                                                                                                                                                        |                                         |                                               |
|------------------------------------------------------------------------------------------------------------------------------------------------------------------------|-----------------------------------------|-----------------------------------------------|
| <b>Gallagher <i>et al</i>, 2012 (49)</b>                                                                                                                               |                                         |                                               |
| USA                                                                                                                                                                    |                                         |                                               |
| Primary PC. Diagnosis: Pathology                                                                                                                                       |                                         |                                               |
| Other details (localized)                                                                                                                                              |                                         |                                               |
| Population (further details): Ashkenazi (Ashkenazi Jewish background)                                                                                                  |                                         |                                               |
| Treatment (further details): radical prostatectomy; radiation therapy; radiation therapy + hormones; Hormone therapy alone; Chemotherapy alone; Watchful waiting; (NR) |                                         |                                               |
| BRCA1+ (n=6)                                                                                                                                                           | BRCA2+ (n=20)                           | DDR- (n=806)                                  |
| Mean age (SD): NR (NR)                                                                                                                                                 | Mean age (SD): NR (NR)                  | Mean age (SD): NR (NR)                        |
| Median age (range): 67.1 (NR)                                                                                                                                          | Median age (range): 62 (NR)             | Median age (range): 68.2 (NR)                 |
| Ethnicity: Jewish (100)                                                                                                                                                | Ethnicity: Jewish (100)                 | Ethnicity: Jewish (100)                       |
| Gleason score: <7 (50); ≥7 (50); NA (0)                                                                                                                                | Gleason score: <7 (10); ≥7 (85); NA (5) | Gleason score: <7 (40.2); ≥7 (54.2); NA (5.6) |
| AJCC stage: NR                                                                                                                                                         | AJCC stage: NR                          | AJCC stage: NR                                |
| TNM stage: NR                                                                                                                                                          | TNM stage: NR                           | TNM stage: NR                                 |

|                                                                                                                                                                                                                                                                                                                                                                                                      |                                                                                                            |                                                                                                                                                                       |
|------------------------------------------------------------------------------------------------------------------------------------------------------------------------------------------------------------------------------------------------------------------------------------------------------------------------------------------------------------------------------------------------------|------------------------------------------------------------------------------------------------------------|-----------------------------------------------------------------------------------------------------------------------------------------------------------------------|
| ECOG score<br>0: NR<br>1: NR<br>0-1: NR<br>≥2: NR                                                                                                                                                                                                                                                                                                                                                    | ECOG score<br>0: NR<br>1: NR<br>0-1: NR<br>≥2: NR                                                          | ECOG score<br>0: NR<br>1: NR<br>0-1: NR<br>≥2: NR                                                                                                                     |
| Previous treatments: Prostatectomy (0);<br>Radiotherapy (17); Radiotherapy + Hormones<br>(50); Hormones alone (34)                                                                                                                                                                                                                                                                                   | Previous treatments: Prostatectomy (50);<br>Radiotherapy alone (20); Radiotherapy +<br>Hormones alone (30) | Previous treatments: Prostatectomy (30);<br>Radiotherapy alone (34); Radiotherapy +<br>Hormones (27); Hormones alone (4);<br>Watchful waiting (4); Chemotherapy (0.1) |
| Familial history of PC: NR                                                                                                                                                                                                                                                                                                                                                                           | Familial history of PC: NR                                                                                 | Familial history of PC: NR                                                                                                                                            |
| Mean years since diagnosis (SD): NR (NR)<br>Median years since diagnosis (range): NR (NR)                                                                                                                                                                                                                                                                                                            | Mean years since diagnosis (SD): NR<br>(NR)<br>Median years since diagnosis (range): NR<br>(NR)            | Mean years since diagnosis (SD): NR (NR)<br>Median years since diagnosis (range): NR<br>(NR)                                                                          |
| Mean PSA ng/ml (SD): NR (NR)<br>Median PSA ng/ml (range): 6.5 (5, 8)                                                                                                                                                                                                                                                                                                                                 | Mean PSA ng/ml (SD): NR (NR)<br>Median PSA ng/ml (range): 7 (6, 9)                                         | Mean PSA ng/ml (SD): NR (NR)<br>Median PSA ng/ml (range): 7 (2, 10)                                                                                                   |
| AJCC, American Joint Committee on Cancer; BRCA, breast cancer susceptibility gene; CRPC, castration-resistant PC; DDR, DNA damage repair; ECOG, Eastern Cooperative Oncology Group; NA, not available; NR, not reported; PC, prostate cancer; PSA, prostate-specific antigen; SD, standard deviation; TNM, Tumor Nodes Metastasis classification of malignant tumors; USA, United States of America. |                                                                                                            |                                                                                                                                                                       |

|                                               |
|-----------------------------------------------|
| <b>Gambhira <i>et al</i>, 2016 (17)</b>       |
| USA                                           |
| mCRPC. Diagnosis:<br>Other details (NR)       |
| Population (further details): unselected (NR) |

|                                                                                                                                                                                                                                                                                                                                 |
|---------------------------------------------------------------------------------------------------------------------------------------------------------------------------------------------------------------------------------------------------------------------------------------------------------------------------------|
| Treatment (further details): NR (NR)                                                                                                                                                                                                                                                                                            |
| Total (n=13)                                                                                                                                                                                                                                                                                                                    |
| Mean age (SD): NR (NR)                                                                                                                                                                                                                                                                                                          |
| Median age (range): NR (NR)                                                                                                                                                                                                                                                                                                     |
| Ethnicity: NR                                                                                                                                                                                                                                                                                                                   |
| Gleason score: NR                                                                                                                                                                                                                                                                                                               |
| AJCC stage: NR                                                                                                                                                                                                                                                                                                                  |
| TNM stage: NR                                                                                                                                                                                                                                                                                                                   |
| ECOG score<br>0: NR<br>1: NR<br>0-1: NR<br>≥2: NR                                                                                                                                                                                                                                                                               |
| Previous treatments: NR                                                                                                                                                                                                                                                                                                         |
| Familial history of PC: NR                                                                                                                                                                                                                                                                                                      |
| Mean years since diagnosis (SD): NR (NR)                                                                                                                                                                                                                                                                                        |
| Median years since diagnosis (range): NR (NR)                                                                                                                                                                                                                                                                                   |
| Mean PSA ng/ml (SD): NR (NR)                                                                                                                                                                                                                                                                                                    |
| Median PSA ng/ml (range): NR (NR)                                                                                                                                                                                                                                                                                               |
| Comments: No patient characteristics provided                                                                                                                                                                                                                                                                                   |
| AJCC, American Joint Committee on Cancer; CRPC, castration-resistant PC; ECOG, Eastern Cooperative Oncology Group; m, metastatic; NR, not reported; PC, prostate cancer; PSA, prostate-specific antigen; SD, standard deviation; TNM, Tumor Nodes Metastasis classification of malignant tumors; USA, United States of America. |

|                                                                                           |
|-------------------------------------------------------------------------------------------|
| <b>Gayther <i>et al</i>, 2000 (50)</b>                                                    |
| UK                                                                                        |
| PC. Diagnosis: NR<br>Other details (NR)                                                   |
| Population (further details): familial (NR)                                               |
| Treatment (further details): NR (NR)                                                      |
| Total (n=38)                                                                              |
| Mean age (SD): 60.3 (NR)<br>Median age (range): NR (43, 76)                               |
| Ethnicity: NR                                                                             |
| Gleason score: NR                                                                         |
| AJCC stage: NR                                                                            |
| TNM stage: NR                                                                             |
| ECOG score<br>0: NR<br>1: NR<br>0-1: NR<br>≥2: NR                                         |
| Previous treatments: NR                                                                   |
| Familial history of PC: NR                                                                |
| Mean years since diagnosis (SD): NR (NR)<br>Median years since diagnosis (range): NR (NR) |

|                                                                                                                                                                                                                                                                        |
|------------------------------------------------------------------------------------------------------------------------------------------------------------------------------------------------------------------------------------------------------------------------|
| Mean PSA ng/ml (SD): NR (NR)                                                                                                                                                                                                                                           |
| Median PSA ng/ml (range): NR (NR)                                                                                                                                                                                                                                      |
| AJCC, American Joint Committee on Cancer; ECOG, Eastern Cooperative Oncology Group; NR, not reported; PC, prostate cancer; PSA, prostate-specific antigen; SD, standard deviation; TNM, Tumor Nodes Metastasis classification of malignant tumors; UK, United Kingdom. |

|                                                                              |                             |                             |                             |
|------------------------------------------------------------------------------|-----------------------------|-----------------------------|-----------------------------|
| <b>Giusti <i>et al</i>, 2003 (51)</b>                                        |                             |                             |                             |
| Israel                                                                       |                             |                             |                             |
| PC. Diagnosis: Histology                                                     |                             |                             |                             |
| Other details (NR)                                                           |                             |                             |                             |
| Population (further details): Ashkenazi (Newly diagnosed Ashkenazi Israelis) |                             |                             |                             |
| Treatment (further details): NR (NR)                                         |                             |                             |                             |
| Total (n=940)                                                                | BRCA1+ (n=15)               | BRCA2+ (n=14)               | DDR- (n=145)                |
| Mean age (SD): NR (NR)                                                       | Mean age (SD): 74.2 (NR)    | Mean age (SD): 71.6 (NR)    | Mean age (SD): 73.6 (NR)    |
| Median age (range): NR (NR)                                                  | Median age (range): NR (NR) | Median age (range): NR (NR) | Median age (range): NR (NR) |
| Ethnicity: NR                                                                | Ethnicity: NR               | Ethnicity: NR               | Ethnicity: NR               |
| Gleason score: NR                                                            | Gleason score: NR           | Gleason score: NR           | Gleason score: NR           |
| AJCC stage: NR                                                               | AJCC stage: NR              | AJCC stage: NR              | AJCC stage: NR              |
| TNM stage: NR                                                                | TNM stage: NR               | TNM stage: NR               | TNM stage: NR               |
| ECOG score                                                                   | ECOG score                  | ECOG score                  | ECOG score                  |
| 0: NR                                                                        | 0: NR                       | 0: NR                       | 0: NR                       |
| 1: NR                                                                        | 1: NR                       | 1: NR                       | 1: NR                       |
| 0-1: NR                                                                      | 0-1: NR                     | 0-1: NR                     | 0-1: NR                     |
| ≥2: NR                                                                       | ≥2: NR                      | ≥2: NR                      | ≥2: NR                      |

|                                                                                                                                                                                                                                                                                                                                                            |                                               |                                               |                                               |
|------------------------------------------------------------------------------------------------------------------------------------------------------------------------------------------------------------------------------------------------------------------------------------------------------------------------------------------------------------|-----------------------------------------------|-----------------------------------------------|-----------------------------------------------|
| Previous treatments: NR                                                                                                                                                                                                                                                                                                                                    | Previous treatments: NR                       | Previous treatments: NR                       | Previous treatments: NR                       |
| Familial history of PC: NR                                                                                                                                                                                                                                                                                                                                 | Familial history of PC: NR                    | Familial history of PC: NR                    | Familial history of PC: NR                    |
| Mean years since diagnosis (SD): NR (NR)                                                                                                                                                                                                                                                                                                                   | Mean years since diagnosis (SD): NR (NR)      | Mean years since diagnosis (SD): NR (NR)      | Mean years since diagnosis (SD): NR (NR)      |
| Median years since diagnosis (range): NR (NR)                                                                                                                                                                                                                                                                                                              | Median years since diagnosis (range): NR (NR) | Median years since diagnosis (range): NR (NR) | Median years since diagnosis (range): NR (NR) |
| Mean PSA ng/ml (SD): NR (NR)                                                                                                                                                                                                                                                                                                                               | Mean PSA ng/ml (SD): NR (NR)                  | Mean PSA ng/ml (SD): NR (NR)                  | Mean PSA ng/ml (SD): NR (NR)                  |
| Median PSA ng/ml (range): NR (NR)                                                                                                                                                                                                                                                                                                                          | Median PSA ng/ml (range): NR (NR)             | Median PSA ng/ml (range): NR (NR)             | Median PSA ng/ml (range): NR (NR)             |
| <p>AJCC, American Joint Committee on Cancer; BRCA, breast cancer susceptibility gene; DDR, DNA damage repair; ECOG, Eastern Cooperative Oncology Group; m, metastatic; IV, intravenous; NR, not reported; PC, prostate cancer; PSA, prostate-specific antigen; SD, standard deviation; TNM, Tumor Nodes Metastasis classification of malignant tumors.</p> |                                               |                                               |                                               |

|                                                                |
|----------------------------------------------------------------|
| <b>Gourdin <i>et al</i>, 2016 (52)</b>                         |
| USA                                                            |
| mPC. Diagnosis: 82% had CRPC                                   |
| Other details (NR)                                             |
| Population (further details): unselected (NR)                  |
| Treatment (further details): NR (NR)                           |
| Total (n=55)                                                   |
| Mean age (SD): NR (NR)                                         |
| Median age (range): NR (NR)                                    |
| Ethnicity: Caucasian (49%); African-American (49%); Asian (2%) |



|                                                                                                                                                                                                                                                                                                                                                         |
|---------------------------------------------------------------------------------------------------------------------------------------------------------------------------------------------------------------------------------------------------------------------------------------------------------------------------------------------------------|
| Gleason score: NR                                                                                                                                                                                                                                                                                                                                       |
| AJCC stage: NR                                                                                                                                                                                                                                                                                                                                          |
| TNM stage: NR                                                                                                                                                                                                                                                                                                                                           |
| ECOG score<br>0: NR<br>1: NR<br>0-1: NR<br>≥2: NR                                                                                                                                                                                                                                                                                                       |
| Previous treatments: NR                                                                                                                                                                                                                                                                                                                                 |
| Familial history of PC: NR                                                                                                                                                                                                                                                                                                                              |
| Mean years since diagnosis (SD): NR (NR)<br>Median years since diagnosis (range): NR (NR)                                                                                                                                                                                                                                                               |
| Mean PSA ng/ml (SD): NR (NR)<br>Median PSA ng/ml (range): NR (NR)                                                                                                                                                                                                                                                                                       |
| Comments: No patient characteristics provided other than ethnicity                                                                                                                                                                                                                                                                                      |
| AJCC, American Joint Committee on Cancer; CRPC, castration-resistant PC; DDR, DNA damage repair; ECOG, Eastern Cooperative Oncology Group; m, metastatic; NR, not reported; PC, prostate cancer; PSA, prostate-specific antigen; SD, standard deviation; TNM, Tumor Nodes Metastasis classification of malignant tumors; USA, United States of America. |

|                                                           |
|-----------------------------------------------------------|
| <b>Grasso <i>et al</i>, 2012 (53)</b>                     |
| USA                                                       |
| mCRPC and primary PC. Diagnosis: NR<br>Other details (NR) |

|                                                                                                                                                                                                                                                                                                                                 |                                                                                           |
|---------------------------------------------------------------------------------------------------------------------------------------------------------------------------------------------------------------------------------------------------------------------------------------------------------------------------------|-------------------------------------------------------------------------------------------|
| Population (further details): unselected (NR)                                                                                                                                                                                                                                                                                   |                                                                                           |
| Treatment (further details): NR (NR)                                                                                                                                                                                                                                                                                            |                                                                                           |
| mCRPC (n=50)                                                                                                                                                                                                                                                                                                                    | Primary PC (n=11)                                                                         |
| Mean age (SD): 71 (7.5)<br>Median age (range): 71 (52, 85)                                                                                                                                                                                                                                                                      | Mean age (SD): 60.9 (5.8)<br>Median age (range): 60 (54, 71)                              |
| Ethnicity: NR                                                                                                                                                                                                                                                                                                                   | Ethnicity: NR                                                                             |
| Gleason score: NR                                                                                                                                                                                                                                                                                                               | Gleason score: 7 (18.2); 8 (36.4); 9 (45.4)                                               |
| AJCC stage: NR                                                                                                                                                                                                                                                                                                                  | AJCC stage: NR                                                                            |
| TNM stage: NR                                                                                                                                                                                                                                                                                                                   | TNM stage: NR                                                                             |
| ECOG score<br>0: NR<br>1: NR<br>0-1: NR<br>≥2: NR                                                                                                                                                                                                                                                                               | ECOG score<br>0: NR<br>1: NR<br>0-1: NR<br>≥2: NR                                         |
| Previous treatments: NR                                                                                                                                                                                                                                                                                                         | Previous treatments: NR                                                                   |
| Familial history of PC: NR                                                                                                                                                                                                                                                                                                      | Familial history of PC: NR                                                                |
| Mean years since diagnosis (SD): NR (NR)<br>Median years since diagnosis (range): NR (NR)                                                                                                                                                                                                                                       | Mean years since diagnosis (SD): NR (NR)<br>Median years since diagnosis (range): NR (NR) |
| Mean PSA ng/ml (SD): 1142 (1818)<br>Median PSA ng/ml (range): 324 (0, 8083)                                                                                                                                                                                                                                                     | Mean PSA ng/ml (SD): 10.9 (7.6)<br>Median PSA ng/ml (range): 6.5 (4.2, 27.1)              |
| AJCC, American Joint Committee on Cancer; CRPC, castration-resistant PC; ECOG, Eastern Cooperative Oncology Group; m, metastatic; NR, not reported; PC, prostate cancer; PSA, prostate-specific antigen; SD, standard deviation; TNM, Tumor Nodes Metastasis classification of malignant tumors; USA, United States of America. |                                                                                           |

|                                                                                                                    |
|--------------------------------------------------------------------------------------------------------------------|
| <b>Hall <i>et al</i>, 1998 (54)</b>                                                                                |
| USA                                                                                                                |
| PC. Diagnosis: NR<br>Other details (NR)                                                                            |
| Population (further details): treatment (External-beam conformal radiotherapy)                                     |
| Treatment (further details): External-beam conformal radiotherapy (High-dose external-beam conformal radiotherapy) |
| Total (n=17)                                                                                                       |
| Mean age (SD): NR (NR)<br>Median age (range): NR (NR)                                                              |
| Ethnicity: NR                                                                                                      |
| Gleason score: NR                                                                                                  |
| AJCC stage: NR                                                                                                     |
| TNM stage: NR                                                                                                      |
| ECOG score<br>0: NR<br>1: NR<br>0-1: NR<br>≥2: NR                                                                  |
| Previous treatments: NR                                                                                            |
| Familial history of PC: NR                                                                                         |
| Mean years since diagnosis (SD): NR (NR)<br>Median years since diagnosis (range): NR (NR)                          |

|                                                                                                                                                                                                                                                                                   |
|-----------------------------------------------------------------------------------------------------------------------------------------------------------------------------------------------------------------------------------------------------------------------------------|
| Mean PSA ng/ml (SD): NR (NR)                                                                                                                                                                                                                                                      |
| Median PSA ng/ml (range): NR (NR)                                                                                                                                                                                                                                                 |
| AJCC, American Joint Committee on Cancer; ECOG, Eastern Cooperative Oncology Group; NR, not reported; PC, prostate cancer; PSA, prostate-specific antigen; SD, standard deviation; TNM, Tumor Nodes Metastasis classification of malignant tumors; USA, United States of America. |

|                                                                                                                       |
|-----------------------------------------------------------------------------------------------------------------------|
| <b>Hamel <i>et al</i>, 2003 (55)</b>                                                                                  |
| Canada                                                                                                                |
| PC. Diagnosis: Pathology reports from patients' medical charts                                                        |
| Other details (NR)                                                                                                    |
| Population (further details): Ashkenazi (Both parents were reported as Ashkenazi Jewish, with no Sephardic heritage.) |
| Treatment (further details): NR (NR)                                                                                  |
| Total (n=146)                                                                                                         |
| Mean age (SD): NR (NR)                                                                                                |
| Median age (range): 67.9 (48.6, 84.2)                                                                                 |
| Ethnicity: NR                                                                                                         |
| Gleason score: $\leq 5$ (36.35%); $\geq 6$ (51.4%)                                                                    |
| AJCC stage: NR                                                                                                        |
| TNM stage: NR                                                                                                         |

|                                                                                                                                                                                                                                                    |
|----------------------------------------------------------------------------------------------------------------------------------------------------------------------------------------------------------------------------------------------------|
| ECOG score                                                                                                                                                                                                                                         |
| 0: NR                                                                                                                                                                                                                                              |
| 1: NR                                                                                                                                                                                                                                              |
| 0-1: NR                                                                                                                                                                                                                                            |
| ≥2: NR                                                                                                                                                                                                                                             |
| Previous treatments: NR                                                                                                                                                                                                                            |
| Familial history of PC: 13 (8.9%)                                                                                                                                                                                                                  |
| Mean years since diagnosis (SD): NR (NR)                                                                                                                                                                                                           |
| Median years since diagnosis (range): 5.7 (0.3, 23.7)                                                                                                                                                                                              |
| Mean PSA ng/ml (SD): NR (NR)                                                                                                                                                                                                                       |
| Median PSA ng/ml (range): NR (NR)                                                                                                                                                                                                                  |
| Comments: 5 cases had missing information for the median time since diagnosis                                                                                                                                                                      |
| AJCC, American Joint Committee on Cancer; ECOG, Eastern Cooperative Oncology Group; NR, not reported; PC, prostate cancer; PSA, prostate-specific antigen; SD, standard deviation; TNM, Tumor Nodes Metastasis classification of malignant tumors. |

|                                                                                                                                   |             |
|-----------------------------------------------------------------------------------------------------------------------------------|-------------|
| <b>Hart <i>et al</i>, 2016 (56)</b>                                                                                               |             |
| USA                                                                                                                               |             |
| mCRPC. Diagnosis: Histology                                                                                                       |             |
| Other details (NR)                                                                                                                |             |
| Population (further details): treatment (Adenocarcinoma, Poorly differentiated, carcinoma NOS, Small-cell carcinoma, and Unknown) |             |
| Treatment (further details): androgen deprivation therapy (NR)                                                                    |             |
| DDR+ (n=13)                                                                                                                       | DDR- (n=56) |

|                                                                                                                                                                                                                                                                                                                                                                                       |                                                                                           |
|---------------------------------------------------------------------------------------------------------------------------------------------------------------------------------------------------------------------------------------------------------------------------------------------------------------------------------------------------------------------------------------|-------------------------------------------------------------------------------------------|
| Mean age (SD): NR (NR)<br>Median age (range): NR (NR)                                                                                                                                                                                                                                                                                                                                 | Mean age (SD): NR (NR)<br>Median age (range): NR (NR)                                     |
| Ethnicity: NR                                                                                                                                                                                                                                                                                                                                                                         | Ethnicity: NR                                                                             |
| Gleason score: 7 (0); 8 (0); 9 (15); 10 (31); no data (54)                                                                                                                                                                                                                                                                                                                            | Gleason score: 7 (4); 8 (27); 9 (11); 10 (23); no data (38)                               |
| AJCC stage: NR                                                                                                                                                                                                                                                                                                                                                                        | AJCC stage: NR                                                                            |
| TNM stage: NR                                                                                                                                                                                                                                                                                                                                                                         | TNM stage: NR                                                                             |
| ECOG score<br>0: NR<br>1: NR<br>0-1: NR<br>≥2: NR                                                                                                                                                                                                                                                                                                                                     | ECOG score<br>0: NR<br>1: NR<br>0-1: NR<br>≥2: NR                                         |
| Previous treatments: NR                                                                                                                                                                                                                                                                                                                                                               | Previous treatments: NR                                                                   |
| Familial history of PC: 10 (77)                                                                                                                                                                                                                                                                                                                                                       | Familial history of PC: 45 (80)                                                           |
| Mean years since diagnosis (SD): NR (NR)<br>Median years since diagnosis (range): NR (NR)                                                                                                                                                                                                                                                                                             | Mean years since diagnosis (SD): NR (NR)<br>Median years since diagnosis (range): NR (NR) |
| Mean PSA ng/ml (SD): NR (NR)<br>Median PSA ng/ml (range): NR (NR)                                                                                                                                                                                                                                                                                                                     | Mean PSA ng/ml (SD): NR (NR)<br>Median PSA ng/ml (range): NR (NR)                         |
| AJCC, American Joint Committee on Cancer; CRPC, castration-resistant PC; DDR, DNA damage repair; ECOG, Eastern Cooperative Oncology Group; m, metastatic; NOS, not otherwise specified; NR, not reported; PC, prostate cancer; PSA, prostate-specific antigen; SD, standard deviation; TNM, Tumor Nodes Metastasis classification of malignant tumors; USA, United States of America. |                                                                                           |

|                                       |
|---------------------------------------|
| <b>Hayano <i>et al</i>, 2016 (57)</b> |
| Japan                                 |

|                                                                                                                                                  |
|--------------------------------------------------------------------------------------------------------------------------------------------------|
| PC. Diagnosis: Histology<br>Other details (NR)                                                                                                   |
| Population (further details): familial (Large PC families (with 3 or 4 patients with PC; n=22) or small PC families (2 patients with PC; n=118)) |
| Treatment (further details): NR (NR)                                                                                                             |
| Total (n=140)                                                                                                                                    |
| Mean age (SD): 69 (NR)<br>Median age (range): NR (40, 88)                                                                                        |
| Ethnicity: NR                                                                                                                                    |
| Gleason score: <7 (30); ≥7 (69); unknown (1)                                                                                                     |
| AJCC stage: NR                                                                                                                                   |
| TNM stage: NR                                                                                                                                    |
| ECOG score<br>0: NR<br>1: NR<br>0-1: NR<br>≥2: NR                                                                                                |
| Previous treatments: NR                                                                                                                          |
| Familial history of PC: NR                                                                                                                       |
| Mean years since diagnosis (SD): NR (NR)<br>Median years since diagnosis (range): NR (NR)                                                        |
| Mean PSA ng/ml (SD): NR (NR)<br>Median PSA ng/ml (range): NR (NR)                                                                                |

AJCC, American Joint Committee on Cancer; ECOG, Eastern Cooperative Oncology Group; NR, not reported; PC, prostate cancer; PSA, prostate-specific antigen; SD, standard deviation; TNM, Tumor Nodes Metastasis classification of malignant tumors.

|                                             |                                 |                                 |
|---------------------------------------------|---------------------------------|---------------------------------|
| <b>Hebbring <i>et al</i>, 2006 (58)</b>     |                                 |                                 |
| Multinational                               |                                 |                                 |
| PC. Diagnosis: NR<br>Other details (NR)     |                                 |                                 |
| Population (further details): familial (NR) |                                 |                                 |
| Treatment (further details): NR (NR)        |                                 |                                 |
| Multinational (n=1819)                      | USA (Mayo Clinic) (n=428)       | Germany (Ulm) (n=299)           |
| Mean age (SD): NR (NR)                      | Mean age (SD): 66 (NR)          | Mean age (SD): 64.6 (NR)        |
| Median age (range): NR (NR)                 | Median age (range): NR (45, 84) | Median age (range): NR (47, 89) |
| Ethnicity: NR                               | Ethnicity: NR                   | Ethnicity: NR                   |
| Gleason score: NR                           | Gleason score: NR               | Gleason score: NR               |
| AJCC stage: NR                              | AJCC stage: NR                  | AJCC stage: NR                  |
| TNM stage: NR                               | TNM stage: NR                   | TNM stage: NR                   |
| ECOG score                                  | ECOG score                      | ECOG score                      |
| 0: NR                                       | 0: NR                           | 0: NR                           |
| 1: NR                                       | 1: NR                           | 1: NR                           |
| 0-1: NR                                     | 0-1: NR                         | 0-1: NR                         |
| ≥2: NR                                      | ≥2: NR                          | ≥2: NR                          |
| Previous treatments: NR                     | Previous treatments: NR         | Previous treatments: NR         |



|                                                                                           |                                                                                           |                                                                                           |
|-------------------------------------------------------------------------------------------|-------------------------------------------------------------------------------------------|-------------------------------------------------------------------------------------------|
| Familial history of PC: 1819 (100)                                                        | Familial history of PC: 428 (100)                                                         | Familial history of PC: 299 (100)                                                         |
| Mean years since diagnosis (SD): NR (NR)<br>Median years since diagnosis (range): NR (NR) | Mean years since diagnosis (SD): NR (NR)<br>Median years since diagnosis (range): NR (NR) | Mean years since diagnosis (SD): NR (NR)<br>Median years since diagnosis (range): NR (NR) |
| Mean PSA ng/ml (SD): NR (NR)<br>Median PSA ng/ml (range): NR (NR)                         | Mean PSA ng/ml (SD): NR (NR)<br>Median PSA ng/ml (range): NR (NR)                         | Mean PSA ng/ml (SD): NR (NR)<br>Median PSA ng/ml (range): NR (NR)                         |
| Comments: Limited population data presented                                               | Comments: Mean age at diagnosis extracted                                                 | Comments: Mean age at diagnosis extracted                                                 |

|                                                       |                                                           |                                                             |
|-------------------------------------------------------|-----------------------------------------------------------|-------------------------------------------------------------|
| <b>Hebbring <i>et al</i>, 2006 (58)</b>               |                                                           |                                                             |
| Multinational                                         |                                                           |                                                             |
| PC. Diagnosis: NR<br>Other details (NR)               |                                                           |                                                             |
| Population (further details): unselected (NR)         |                                                           |                                                             |
| Treatment (further details): NR (NR)                  |                                                           |                                                             |
| Multinational (n=1218)                                | USA (Mayo Clinic) (n=492)                                 | Germany (Ulm) (n=338)                                       |
| Mean age (SD): NR (NR)<br>Median age (range): NR (NR) | Mean age (SD): 64 (NR)<br>Median age (range): NR (46, 79) | Mean age (SD): 63.7 (NR)<br>Median age (range): NR (42, 84) |
| Ethnicity: NR                                         | Ethnicity: NR                                             | Ethnicity: NR                                               |
| Gleason score: NR                                     | Gleason score: NR                                         | Gleason score: NR                                           |
| AJCC stage: NR                                        | AJCC stage: NR                                            | AJCC stage: NR                                              |
| TNM stage: NR                                         | TNM stage: NR                                             | TNM stage: NR                                               |

|                                                                                                                                                                                                                                                                                   |                                                                                           |                                                                                           |
|-----------------------------------------------------------------------------------------------------------------------------------------------------------------------------------------------------------------------------------------------------------------------------------|-------------------------------------------------------------------------------------------|-------------------------------------------------------------------------------------------|
| ECOG score<br>0: NR<br>1: NR<br>0-1: NR<br>≥2: NR                                                                                                                                                                                                                                 | ECOG score<br>0: NR<br>1: NR<br>0-1: NR<br>≥2: NR                                         | ECOG score<br>0: NR<br>1: NR<br>0-1: NR<br>≥2: NR                                         |
| Previous treatments: NR                                                                                                                                                                                                                                                           | Previous treatments: NR                                                                   | Previous treatments: NR                                                                   |
| Familial history of PC: 0 (0)                                                                                                                                                                                                                                                     | Familial history of PC: 0 (0)                                                             | Familial history of PC: 0 (0)                                                             |
| Mean years since diagnosis (SD): NR (NR)<br>Median years since diagnosis (range): NR (NR)                                                                                                                                                                                         | Mean years since diagnosis (SD): NR (NR)<br>Median years since diagnosis (range): NR (NR) | Mean years since diagnosis (SD): NR (NR)<br>Median years since diagnosis (range): NR (NR) |
| Mean PSA ng/ml (SD): NR (NR)<br>Median PSA ng/ml (range): NR (NR)                                                                                                                                                                                                                 | Mean PSA ng/ml (SD): NR (NR)<br>Median PSA ng/ml (range): NR (NR)                         | Mean PSA ng/ml (SD): NR (NR)<br>Median PSA ng/ml (range): NR (NR)                         |
| Comments: Limited population data presented                                                                                                                                                                                                                                       | Comments: Mean age at diagnosis extracted                                                 | Comments: Mean age at diagnosis extracted                                                 |
| AJCC, American Joint Committee on Cancer; ECOG, Eastern Cooperative Oncology Group; NR, not reported; PC, prostate cancer; PSA, prostate-specific antigen; SD, standard deviation; TNM, Tumor Nodes Metastasis classification of malignant tumors; USA, United States of America. |                                                                                           |                                                                                           |

|                                                        |
|--------------------------------------------------------|
| <b>Hubert <i>et al</i>, 1999 (59)</b>                  |
| Israel                                                 |
| PC. Diagnosis: Histology and PSA<br>Other details (NR) |
| Population (further details): Ashkenazi (NR)           |

|                                                                                                                                                                                                                                                                            |                                               |                                               |
|----------------------------------------------------------------------------------------------------------------------------------------------------------------------------------------------------------------------------------------------------------------------------|-----------------------------------------------|-----------------------------------------------|
| Treatment (further details): NR (NR)                                                                                                                                                                                                                                       |                                               |                                               |
| Total (n=87)                                                                                                                                                                                                                                                               | DDR+ (n=3)                                    | DDR- (n=84)                                   |
| Mean age (SD): NR (NR)                                                                                                                                                                                                                                                     | Mean age (SD): 64 (NR)                        | Mean age (SD): NR (NR)                        |
| Median age (range): 71 (NR)                                                                                                                                                                                                                                                | Median age (range): NR (57, 73)               | Median age (range): NR (NR)                   |
| Ethnicity: NR                                                                                                                                                                                                                                                              | Ethnicity: NR                                 | Ethnicity: NR                                 |
| Gleason score: NR                                                                                                                                                                                                                                                          | Gleason score: 7 (33.3); $\geq 8$ (66.6)      | Gleason score: Average: 5.9                   |
| AJCC stage: NR                                                                                                                                                                                                                                                             | AJCC stage: NR                                | AJCC stage: NR                                |
| TNM stage: NR                                                                                                                                                                                                                                                              | TNM stage: NR                                 | TNM stage: NR                                 |
| ECOG score                                                                                                                                                                                                                                                                 | ECOG score                                    | ECOG score                                    |
| 0: NR                                                                                                                                                                                                                                                                      | 0: NR                                         | 0: NR                                         |
| 1: NR                                                                                                                                                                                                                                                                      | 1: NR                                         | 1: NR                                         |
| 0-1: NR                                                                                                                                                                                                                                                                    | 0-1: NR                                       | 0-1: NR                                       |
| $\geq 2$ : NR                                                                                                                                                                                                                                                              | $\geq 2$ : NR                                 | $\geq 2$ : NR                                 |
| Previous treatments: NR                                                                                                                                                                                                                                                    | Previous treatments: NR                       | Previous treatments: NR                       |
| Familial history of PC: 5 (5.7)                                                                                                                                                                                                                                            | Familial history of PC: NR                    | Familial history of PC: NR                    |
| Mean years since diagnosis (SD): NR (NR)                                                                                                                                                                                                                                   | Mean years since diagnosis (SD): NR (NR)      | Mean years since diagnosis (SD): NR (NR)      |
| Median years since diagnosis (range): NR (NR)                                                                                                                                                                                                                              | Median years since diagnosis (range): NR (NR) | Median years since diagnosis (range): NR (NR) |
| Mean PSA ng/ml (SD): NR (NR)                                                                                                                                                                                                                                               | Mean PSA ng/ml (SD): 55.8 (NR)                | Mean PSA ng/ml (SD): 23.6 (NR)                |
| Median PSA ng/ml (range): NR (NR)                                                                                                                                                                                                                                          | Median PSA ng/ml (range): NR (47, 60)         | Median PSA ng/ml (range): NR (NR)             |
| Comments: 71 years at diagnosis                                                                                                                                                                                                                                            |                                               |                                               |
| AJCC, American Joint Committee on Cancer; DDR, DNA damage repair; ECOG, Eastern Cooperative Oncology Group; NR, not reported; PC, prostate cancer; PSA, prostate-specific antigen; SD, standard deviation; TNM, Tumor Nodes Metastasis classification of malignant tumors. |                                               |                                               |

|                                                                                                                                                                                                                                                                                                             |                                                            |
|-------------------------------------------------------------------------------------------------------------------------------------------------------------------------------------------------------------------------------------------------------------------------------------------------------------|------------------------------------------------------------|
| <b>Hussain <i>et al</i>, 2017 (60)</b>                                                                                                                                                                                                                                                                      |                                                            |
| USA                                                                                                                                                                                                                                                                                                         |                                                            |
| mCRPC. Diagnosis: Histology or cytology                                                                                                                                                                                                                                                                     |                                                            |
| Other details (NR)                                                                                                                                                                                                                                                                                          |                                                            |
| Population (further details): unselected (NR)                                                                                                                                                                                                                                                               |                                                            |
| Treatment (further details): Abiraterone (1000 mg per day plus prednisone 5 mg twice per day (arm A) or AAP plus veliparib 300 mg twice per day (arm B), for days 1 to 28. Treatment was continued until radiographic/clinical disease progression, inter-current illness, unacceptable adverse events (A). |                                                            |
| Abiraterone + veliparib (AAP plus veliparib 300 mg twice per day (arm B), for days 1 to 28. Arm B patients underwent lead-in treatment with AAP, followed on day 8 by veliparib, in cycle 1 only. Treatment was continued until radiographic/clinical disease progression, inter-current)                   |                                                            |
| A (n=72)                                                                                                                                                                                                                                                                                                    | A+V (n=76)                                                 |
| Mean age (SD): NR (NR)                                                                                                                                                                                                                                                                                      | Mean age (SD): NR (NR)                                     |
| Median age (range): 69 (50, 90)                                                                                                                                                                                                                                                                             | Median age (range): 68 (47, 85)                            |
| Ethnicity: Caucasian (83); African American (12); other (3)                                                                                                                                                                                                                                                 | Ethnicity: Caucasian (94); African American (4); other (3) |
| Gleason score: NR                                                                                                                                                                                                                                                                                           | Gleason score: NR                                          |
| AJCC stage: NR                                                                                                                                                                                                                                                                                              | AJCC stage: NR                                             |
| TNM stage: NR                                                                                                                                                                                                                                                                                               | TNM stage: NR                                              |
| ECOG score                                                                                                                                                                                                                                                                                                  | ECOG score                                                 |
| 0: 46 (62)                                                                                                                                                                                                                                                                                                  | 0: 50 (63)                                                 |
| 1: 28 (38)                                                                                                                                                                                                                                                                                                  | 1: 28 (35)                                                 |
| 0-1: NR                                                                                                                                                                                                                                                                                                     | 0-1: NR                                                    |
| ≥2: 0                                                                                                                                                                                                                                                                                                       | ≥2: 1 (1)                                                  |

|                                                                                                                                                                                                                                                                                                                  |                                                                                                                                       |
|------------------------------------------------------------------------------------------------------------------------------------------------------------------------------------------------------------------------------------------------------------------------------------------------------------------|---------------------------------------------------------------------------------------------------------------------------------------|
| Previous treatments: Docetaxel/cabazitaxel (15); other chemotherapy (7); Enzalutamide (3); Sipuleucel-T (30); Experimental agent (26)                                                                                                                                                                            | Previous treatments: Docetaxel/cabazitaxel (22); other chemotherapy (8); Enzalutamide (3); Sipuleucel-T (17); Experimental agent (19) |
| Familial history of PC: NR                                                                                                                                                                                                                                                                                       | Familial history of PC: NR                                                                                                            |
| Mean years since diagnosis (SD): NR (NR)                                                                                                                                                                                                                                                                         | Mean years since diagnosis (SD): NR (NR)                                                                                              |
| Median years since diagnosis (range): NR (NR)                                                                                                                                                                                                                                                                    | Median years since diagnosis (range): NR (NR)                                                                                         |
| Mean PSA ng/ml (SD): NR (NR)                                                                                                                                                                                                                                                                                     | Mean PSA ng/ml (SD): NR (NR)                                                                                                          |
| Median PSA ng/ml (range): 32.7 (0.8, 1557.6)                                                                                                                                                                                                                                                                     | Median PSA ng/ml (range): 36.4 (0.04, 1074.4)                                                                                         |
| AJCC, American Joint Committee on Cancer; CRPC, castration-resistant PC; ECOG, Eastern Cooperative Oncology Group; NR, not reported; PC, prostate cancer; PSA, prostate-specific antigen; SD, standard deviation; TNM, Tumor Nodes Metastasis classification of malignant tumors; USA, United States of America. |                                                                                                                                       |

|                                               |
|-----------------------------------------------|
| <b>Jefferies <i>et al</i>, 2017 (61)</b>      |
| UK                                            |
| Primary PC. Diagnosis: Histology              |
| Other details (NR)                            |
| Population (further details): unselected (NR) |
| Treatment (further details): NR (NR)          |
| Total (n=61)                                  |
| Mean age (SD): NR (NR)                        |
| Median age (range): NR (NR)                   |
| Ethnicity: NR                                 |
| Gleason score: NR                             |
| AJCC stage: NR                                |

|                                                                                                                                                                                                                                                                        |
|------------------------------------------------------------------------------------------------------------------------------------------------------------------------------------------------------------------------------------------------------------------------|
| TNM stage: NR                                                                                                                                                                                                                                                          |
| ECOG score<br>0: NR<br>1: NR<br>0-1: NR<br>≥2: NR                                                                                                                                                                                                                      |
| Previous treatments: NR                                                                                                                                                                                                                                                |
| Familial history of PC: NR                                                                                                                                                                                                                                             |
| Mean years since diagnosis (SD): NR (NR)<br>Median years since diagnosis (range): NR (NR)                                                                                                                                                                              |
| Mean PSA ng/ml (SD): NR (NR)<br>Median PSA ng/ml (range): NR (NR)                                                                                                                                                                                                      |
| Comments: no details                                                                                                                                                                                                                                                   |
| AJCC, American Joint Committee on Cancer; ECOG, Eastern Cooperative Oncology Group; NR, not reported; PC, prostate cancer; PSA, prostate-specific antigen; SD, standard deviation; TNM, Tumor Nodes Metastasis classification of malignant tumors; UK, United Kingdom. |

|                                                                    |
|--------------------------------------------------------------------|
| <b>Kaufman <i>et al</i>, 2015 (62)</b>                             |
| Multi-national                                                     |
| mCRPC. Diagnosis: NR<br>Other details (NR)                         |
| Population (further details): unselected (NR)                      |
| Treatment (further details): Olaparib (400 mg capsule twice daily) |
| Total (n=8)                                                        |

|                                                                                                                                                                                                                                                                                                  |
|--------------------------------------------------------------------------------------------------------------------------------------------------------------------------------------------------------------------------------------------------------------------------------------------------|
| Mean age (SD): 66.6 (9.86)                                                                                                                                                                                                                                                                       |
| Median age (range): 71 (51, 77)                                                                                                                                                                                                                                                                  |
| Ethnicity: Caucasian (100)                                                                                                                                                                                                                                                                       |
| Gleason score: NR                                                                                                                                                                                                                                                                                |
| AJCC stage: NR                                                                                                                                                                                                                                                                                   |
| TNM stage: NR                                                                                                                                                                                                                                                                                    |
| ECOG score<br>0: 1 (12.5)<br>1: 4 (50)<br>0-1: NR<br>≥2: 3 (37.5)                                                                                                                                                                                                                                |
| Previous treatments: Docetaxel (75); platinum carboplatin or cisplatin (50)                                                                                                                                                                                                                      |
| Familial history of PC: NR                                                                                                                                                                                                                                                                       |
| Mean years since diagnosis (SD): NR (NR)<br>Median years since diagnosis (range): NR (NR)                                                                                                                                                                                                        |
| Mean PSA ng/ml (SD): NR (NR)<br>Median PSA ng/ml (range): NR (NR)                                                                                                                                                                                                                                |
| Comments: No PSA details were presented                                                                                                                                                                                                                                                          |
| AJCC, American Joint Committee on Cancer; CRPC, castration-resistant PC; ECOG, Eastern Cooperative Oncology Group; m, metastatic; NR, not reported; PC, prostate cancer; PSA, prostate-specific antigen; SD, standard deviation; TNM, Tumor Nodes Metastasis classification of malignant tumors. |

**Kirchoff *et al*, 2004 (63)**

|                                                                                           |
|-------------------------------------------------------------------------------------------|
| USA                                                                                       |
| PC. Diagnosis: NR<br>Other details (NR)                                                   |
| Population (further details): Ashkenazi (NR)                                              |
| Treatment (further details): NR (NR)                                                      |
| Total (n=251)                                                                             |
| Mean age (SD): 65.7 (NR)<br>Median age (range): NR (NR)                                   |
| Ethnicity: Ashkenazi Jewish men (100)                                                     |
| Gleason score: NR                                                                         |
| AJCC stage: NR                                                                            |
| TNM stage: NR                                                                             |
| ECOG score<br>0: NR<br>1: NR<br>0-1: NR<br>≥2: NR                                         |
| Previous treatments: NR                                                                   |
| Familial history of PC: NR                                                                |
| Mean years since diagnosis (SD): NR (NR)<br>Median years since diagnosis (range): NR (NR) |
| Mean PSA ng/ml (SD): NR (NR)<br>Median PSA ng/ml (range): NR (NR)                         |



Comments: mean age for DDR+ PC cases, for controls (still DDR+ but no PC) mean age was 51.0, calculations age adjusted, see table 2

AJCC, American Joint Committee on Cancer; DDR, DNA damage repair; ECOG, Eastern Cooperative Oncology Group; NR, not reported; PC, prostate cancer; PSA, prostate-specific antigen; SD, standard deviation; TNM, Tumor Nodes Metastasis classification of malignant tumors; USA, United States of America.

|                                                                                     |
|-------------------------------------------------------------------------------------|
| <b>Kote-Jarai <i>et al</i>, 2011 (64)</b>                                           |
| UK                                                                                  |
| Other. Diagnosis: <65 years; NR<br>Other details (Young-onset PC (onset ≤65 years)) |
| Population (further details): unselected (NR)                                       |
| Treatment (further details): NR (NR)                                                |
| Total (n=1589)                                                                      |
| Mean age (SD): NR (NR)                                                              |
| Median age (range): NR (36, 65)                                                     |
| Ethnicity: NR                                                                       |
| Gleason score: NR                                                                   |
| AJCC stage: NR                                                                      |
| TNM stage: NR                                                                       |
| ECOG score<br>0: NR<br>1: NR<br>0-1: NR<br>≥2: NR                                   |

|                                                                                                                                                                                                                                                                        |
|------------------------------------------------------------------------------------------------------------------------------------------------------------------------------------------------------------------------------------------------------------------------|
| Previous treatments: NR                                                                                                                                                                                                                                                |
| Familial history of PC: 85.1                                                                                                                                                                                                                                           |
| Mean years since diagnosis (SD): NR (NR)                                                                                                                                                                                                                               |
| Median years since diagnosis (range): NR (NR)                                                                                                                                                                                                                          |
| Mean PSA ng/ml (SD): NR (NR)                                                                                                                                                                                                                                           |
| Median PSA ng/ml (range): NR (NR)                                                                                                                                                                                                                                      |
| AJCC, American Joint Committee on Cancer; ECOG, Eastern Cooperative Oncology Group; NR, not reported; PC, prostate cancer; PSA, prostate-specific antigen; SD, standard deviation; TNM, Tumor Nodes Metastasis classification of malignant tumors; UK, United Kingdom. |

|                                                                                                           |
|-----------------------------------------------------------------------------------------------------------|
| <b>LaDuca <i>et al</i>, 2017 (65)</b>                                                                     |
| USA                                                                                                       |
| PC. Diagnosis: NR                                                                                         |
| Other details (NR)                                                                                        |
| Population (further details): familial (Patients referred for hereditary cancer multi-gene panel testing) |
| Treatment (further details): NR (NR)                                                                      |
| Total (n=NR)                                                                                              |
| Mean age (SD): NR (NR)                                                                                    |
| Median age (range): NR (NR)                                                                               |
| Ethnicity: NR                                                                                             |
| Gleason score: NR                                                                                         |
| AJCC stage: NR                                                                                            |
| TNM stage: NR                                                                                             |

|                                                                                                                                                                                                                                                                                   |
|-----------------------------------------------------------------------------------------------------------------------------------------------------------------------------------------------------------------------------------------------------------------------------------|
| ECOG score                                                                                                                                                                                                                                                                        |
| 0: NR                                                                                                                                                                                                                                                                             |
| 1: NR                                                                                                                                                                                                                                                                             |
| 0-1: NR                                                                                                                                                                                                                                                                           |
| ≥2: NR                                                                                                                                                                                                                                                                            |
| Previous treatments: NR                                                                                                                                                                                                                                                           |
| Familial history of PC: NR                                                                                                                                                                                                                                                        |
| Mean years since diagnosis (SD): NR (NR)                                                                                                                                                                                                                                          |
| Median years since diagnosis (range): NR (NR)                                                                                                                                                                                                                                     |
| Mean PSA ng/ml (SD): NR (NR)                                                                                                                                                                                                                                                      |
| Median PSA ng/ml (range): NR (NR)                                                                                                                                                                                                                                                 |
| Comments: No details provided regarding patient characteristics (nor even the number of patients)                                                                                                                                                                                 |
| AJCC, American Joint Committee on Cancer; ECOG, Eastern Cooperative Oncology Group; NR, not reported; PC, prostate cancer; PSA, prostate-specific antigen; SD, standard deviation; TNM, Tumor Nodes Metastasis classification of malignant tumors; USA, United States of America. |

|                                               |
|-----------------------------------------------|
| <b>Lara <i>et al</i>, 2017 (66)</b>           |
| USA                                           |
| PC. Diagnosis: NR                             |
| Other details (NR)                            |
| Population (further details): unselected (NR) |
| Treatment (further details): NR (NR)          |
| Total (n=207; 936)                            |

|                                                                                                                                                                                                                                                                                   |
|-----------------------------------------------------------------------------------------------------------------------------------------------------------------------------------------------------------------------------------------------------------------------------------|
| Mean age (SD): NR (NR)                                                                                                                                                                                                                                                            |
| Median age (range): NR (NR)                                                                                                                                                                                                                                                       |
| Ethnicity: NR                                                                                                                                                                                                                                                                     |
| Gleason score: NR                                                                                                                                                                                                                                                                 |
| AJCC stage: NR                                                                                                                                                                                                                                                                    |
| TNM stage: NR                                                                                                                                                                                                                                                                     |
| ECOG score<br>0: NR<br>1: NR<br>0-1: NR<br>≥2: NR                                                                                                                                                                                                                                 |
| Previous treatments: NR                                                                                                                                                                                                                                                           |
| Familial history of PC: NR                                                                                                                                                                                                                                                        |
| Mean years since diagnosis (SD): NR (NR)                                                                                                                                                                                                                                          |
| Median years since diagnosis (range): NR (NR)                                                                                                                                                                                                                                     |
| Mean PSA ng/ml (SD): NR (NR)                                                                                                                                                                                                                                                      |
| Median PSA ng/ml (range): NR (NR)                                                                                                                                                                                                                                                 |
| AJCC, American Joint Committee on Cancer; ECOG, Eastern Cooperative Oncology Group; NR, not reported; PC, prostate cancer; PSA, prostate-specific antigen; SD, standard deviation; TNM, Tumor Nodes Metastasis classification of malignant tumors; USA, United States of America. |

|                                      |
|--------------------------------------|
| <b>Ledet <i>et al</i>, 2017 (67)</b> |
| USA                                  |

|                                                                                                                         |
|-------------------------------------------------------------------------------------------------------------------------|
| PC. Diagnosis: NR<br>Other details (NR)                                                                                 |
| Population (further details): familial (PC patients with a family history that met NCCN guidelines for genetic testing) |
| Treatment (further details): NR (NR)                                                                                    |
| Total (n=124)                                                                                                           |
| Mean age (SD): NR (NR)<br>Median age (range): NR (NR)                                                                   |
| Ethnicity: NR                                                                                                           |
| Gleason score: NR                                                                                                       |
| AJCC stage: NR                                                                                                          |
| TNM stage: NR                                                                                                           |
| ECOG score<br>0: NR<br>1: NR<br>0-1: NR<br>≥2: NR                                                                       |
| Previous treatments: NR                                                                                                 |
| Familial history of PC: 124 (100)                                                                                       |
| Mean years since diagnosis (SD): NR (NR)<br>Median years since diagnosis (range): NR (NR)                               |
| Mean PSA ng/ml (SD): NR (NR)<br>Median PSA ng/ml (range): NR (NR)                                                       |

Comments: Limited description of population characteristics provided. Ethnicity described for the larger cohort of n=535 patients, but not for the finally selected study cohort of n=124

AJCC, American Joint Committee on Cancer; ECOG, Eastern Cooperative Oncology Group; NCCN, National Comprehensive Cancer Network; NR, not reported; PC, prostate cancer; PSA, prostate-specific antigen; SD, standard deviation; TNM, Tumor Nodes Metastasis classification of malignant tumors; USA, United States of America.

**Lehrer *et al*, 1998 (68)**

USA

PC. Diagnosis: Histology

Other details (NR)

Population (further details): Ashkenazi (Ethnic background was confirmed for all subjects by self-report or interview.)

Treatment (further details): NR (NR)

Total (n=60)

Mean age (SD): 70 (5.25)

Median age (range): NR (55, 80)

Ethnicity: Ashkenazi Jewish men (100)

Gleason score: NR

AJCC stage: NR

TNM stage: NR

ECOG score

0: NR

1: NR

0-1: NR

≥2: NR

|                                                                                                                                                                                                                                                                                                                            |
|----------------------------------------------------------------------------------------------------------------------------------------------------------------------------------------------------------------------------------------------------------------------------------------------------------------------------|
| Previous treatments: NR                                                                                                                                                                                                                                                                                                    |
| Familial history of PC: 6 (10)                                                                                                                                                                                                                                                                                             |
| Mean years since diagnosis (SD): NR (NR)                                                                                                                                                                                                                                                                                   |
| Median years since diagnosis (range): NR (NR)                                                                                                                                                                                                                                                                              |
| Mean PSA ng/ml (SD): NR (NR)                                                                                                                                                                                                                                                                                               |
| Median PSA ng/ml (range): NR (NR)                                                                                                                                                                                                                                                                                          |
| Comments: Only looking at PC, no controls but using two earlier papers for control cohort: "Following the finding of a 185delAG frameshift mutation of BRCAJ in several Ashkenazi Jewish breast/ovarian cancer families, the frequency of this mutation was found to be 0"                                                 |
| AJCC, American Joint Committee on Cancer; BRCA, breast cancer susceptibility gene; ECOG, Eastern Cooperative Oncology Group; NR, not reported; PC, prostate cancer; PSA, prostate-specific antigen; SD, standard deviation; TNM, Tumor Nodes Metastasis classification of malignant tumors; USA, United States of America. |

|                                               |
|-----------------------------------------------|
| <b>Leongamornlert <i>et al</i>, 2012 (69)</b> |
| UK                                            |
| PC. Diagnosis: NR                             |
| Other details (NR)                            |
| Population (further details): unselected (NR) |
| Treatment (further details): NR (NR)          |
| Total (n=886)                                 |
| Mean age (SD): NR (NR)                        |
| Median age (range): NR (36, 88)               |
| Ethnicity: NR                                 |
| Gleason score: NR                             |

|                                                                                                                                                                                                                                                                                                                 |
|-----------------------------------------------------------------------------------------------------------------------------------------------------------------------------------------------------------------------------------------------------------------------------------------------------------------|
| AJCC stage: NR                                                                                                                                                                                                                                                                                                  |
| TNM stage: NR                                                                                                                                                                                                                                                                                                   |
| ECOG score<br>0: NR<br>1: NR<br>0-1: NR<br>≥2: NR                                                                                                                                                                                                                                                               |
| Previous treatments: NR                                                                                                                                                                                                                                                                                         |
| Familial history of PC: NR                                                                                                                                                                                                                                                                                      |
| Mean years since diagnosis (SD): NR (NR)<br>Median years since diagnosis (range): NR (NR)                                                                                                                                                                                                                       |
| Mean PSA ng/ml (SD): NR (NR)<br>Median PSA ng/ml (range): NR (NR)                                                                                                                                                                                                                                               |
| Comments: Has data on BRCA1 prevalence stratified by age (36-55, 56-65, 66-88)                                                                                                                                                                                                                                  |
| AJCC, American Joint Committee on Cancer; BRCA, breast cancer susceptibility gene; ECOG, Eastern Cooperative Oncology Group; NR, not reported; PC, prostate cancer; PSA, prostate-specific antigen; SD, standard deviation; TNM, Tumor Nodes Metastasis classification of malignant tumors; UK, United Kingdom. |

|                                                                               |
|-------------------------------------------------------------------------------|
| <b>Leongamornlert <i>et al</i>, 2014 (70)</b>                                 |
| UK                                                                            |
| PC. Diagnosis: Clinical detection or PSA screening<br>Other details (NR)      |
| Population (further details): familial (Two or more relatives affected by PC) |



|                                                                                             |                                                                                                                                             |                                                                                                                                           |
|---------------------------------------------------------------------------------------------|---------------------------------------------------------------------------------------------------------------------------------------------|-------------------------------------------------------------------------------------------------------------------------------------------|
| Treatment (further details): NR (NR)                                                        |                                                                                                                                             |                                                                                                                                           |
| Total (n=191)                                                                               | DDR+ (n=14)                                                                                                                                 | DDR- (n=140)                                                                                                                              |
| Mean age (SD): NR (NR)                                                                      | Mean age (SD): NR (NR)                                                                                                                      | Mean age (SD): NR (NR)                                                                                                                    |
| Median age (range): NR (NR)                                                                 | Median age (range): 58.5 (41, 71)                                                                                                           | Median age (range): 59 (47, 82)                                                                                                           |
| Ethnicity: White (68.6); Black African/Caribbean (2.6); Ashkenazi Jew (0.5); unknown (28.3) | Ethnicity: NR                                                                                                                               | Ethnicity: NR                                                                                                                             |
| Gleason score: NR                                                                           | Gleason score: $\leq 6$ (35.71); 7 (14.29); $\geq 8$ (21.43); unknown (28.57)                                                               | Gleason score: $\leq 6$ (44.29); 7 (19.29); $\geq 8$ (10.71); unknown (25.71)                                                             |
| AJCC stage: NR                                                                              | AJCC stage: I-III (21.43); IV (35.71); unknown (42.86)                                                                                      | AJCC stage: I-III (48.57); IV (5.00); unknown (46.43)                                                                                     |
| TNM stage: NR                                                                               | TNM stage: T1 (21.43); T2 (28.57); T3 (14.29); T4 (7.14); TX (28.57); N0 (28.57); N1 (21.43); NX (50.00); M0 (50.00) M1 (21.43); MX (28.57) | TNM stage: T1 (27.14); T2 (32.14); T3 (17.14); T4 (1.43); TX (22.14); N0 (54.29); N1 (0.71); NX (45.00); M0 (52.86) M1 (3.57); MX (43.57) |
| ECOG score<br>0: NR<br>1: NR<br>0-1: NR<br>$\geq 2$ : NR                                    | ECOG score<br>0: NR<br>1: NR<br>0-1: NR<br>$\geq 2$ : NR                                                                                    | ECOG score<br>0: NR<br>1: NR<br>0-1: NR<br>$\geq 2$ : NR                                                                                  |
| Previous treatments: NR                                                                     | Previous treatments: NR                                                                                                                     | Previous treatments: NR                                                                                                                   |
| Familial history of PC: NR                                                                  | Familial history of PC: NR                                                                                                                  | Familial history of PC: NR                                                                                                                |
| Mean years since diagnosis (SD): NR (NR)<br>Median years since diagnosis (range): NR (NR)   | Mean years since diagnosis (SD): NR (NR)<br>Median years since diagnosis (range): NR (NR)                                                   | Mean years since diagnosis (SD): NR (NR)<br>Median years since diagnosis (range): NR (NR)                                                 |

|                                                                                                                                                                                                                                                                                                       |                                                                              |                                                                            |
|-------------------------------------------------------------------------------------------------------------------------------------------------------------------------------------------------------------------------------------------------------------------------------------------------------|------------------------------------------------------------------------------|----------------------------------------------------------------------------|
| Mean PSA ng/ml (SD): NR (NR)<br>Median PSA ng/ml (range): NR (NR)                                                                                                                                                                                                                                     | Mean PSA ng/ml (SD): NR (NR)<br>Median PSA ng/ml (range): 11.1 (3.09, 91.12) | Mean PSA ng/ml (SD): NR (NR)<br>Median PSA ng/ml (range): 8.25 (0.04, 259) |
|                                                                                                                                                                                                                                                                                                       | Comments: PSA given at diagnosis                                             | Comments: PSA given at diagnosis                                           |
| AJCC, American Joint Committee on Cancer; CRPC, castration-resistant PC; ECOG, Eastern Cooperative Oncology Group; NR, not reported; PC, prostate cancer; PSA, prostate-specific antigen; SD, standard deviation; TNM, Tumor Nodes Metastasis classification of malignant tumors; UK, United Kingdom. |                                                                              |                                                                            |

|                                                       |
|-------------------------------------------------------|
| <b>Liu <i>et al</i>, 2016 (5)</b>                     |
| NR                                                    |
| PC. Diagnosis: Histology<br>Other details (NR)        |
| Population (further details): unselected (NR)         |
| Treatment (further details): NR (NR)                  |
| Total (n=36)                                          |
| Mean age (SD): NR (NR)<br>Median age (range): NR (NR) |
| Ethnicity: NR                                         |
| Gleason score: 7 (100)                                |
| AJCC stage: NR                                        |
| TNM stage: NR                                         |

|                                                                                                                                                                                                                                                                            |
|----------------------------------------------------------------------------------------------------------------------------------------------------------------------------------------------------------------------------------------------------------------------------|
| ECOG score<br>0: NR<br>1: NR<br>0-1: NR<br>≥2: NR                                                                                                                                                                                                                          |
| Previous treatments: NR                                                                                                                                                                                                                                                    |
| Familial history of PC: NR                                                                                                                                                                                                                                                 |
| Mean years since diagnosis (SD): NR (NR)<br>Median years since diagnosis (range): NR (NR)                                                                                                                                                                                  |
| Mean PSA ng/ml (SD): NR (NR)<br>Median PSA ng/ml (range): NR (NR)                                                                                                                                                                                                          |
| AJCC, American Joint Committee on Cancer; DDR, DNA damage repair; ECOG, Eastern Cooperative Oncology Group; NR, not reported; PC, prostate cancer; PSA, prostate-specific antigen; SD, standard deviation; TNM, Tumor Nodes Metastasis classification of malignant tumors. |

|                                                          |
|----------------------------------------------------------|
| <b>Lu <i>et al</i>, 2015 (71)</b>                        |
| Multi-national                                           |
| PC. Diagnosis: NR<br>Other details (NR)                  |
| Population (further details): unselected (NR)            |
| Treatment (further details): NR (NR)                     |
| Total (n=178)                                            |
| Mean age (SD): 60.4 (6.9)<br>Median age (range): NR (NR) |

|                                                                                                                                                                                                                                                    |
|----------------------------------------------------------------------------------------------------------------------------------------------------------------------------------------------------------------------------------------------------|
| Ethnicity: Caucasian (73.03); Asian (1.12); African American (3.37); NR (5.62)                                                                                                                                                                     |
| Gleason score: NR                                                                                                                                                                                                                                  |
| AJCC stage: NR                                                                                                                                                                                                                                     |
| TNM stage: NR                                                                                                                                                                                                                                      |
| ECOG score<br>0: NR<br>1: NR<br>0-1: NR<br>≥2: NR                                                                                                                                                                                                  |
| Previous treatments: NR                                                                                                                                                                                                                            |
| Familial history of PC: NR                                                                                                                                                                                                                         |
| Mean years since diagnosis (SD): NR (NR)<br>Median years since diagnosis (range): NR (NR)                                                                                                                                                          |
| Mean PSA ng/ml (SD): NR (NR)<br>Median PSA ng/ml (range): NR (NR)                                                                                                                                                                                  |
| Comments: Very limited PC data available                                                                                                                                                                                                           |
| AJCC, American Joint Committee on Cancer; ECOG, Eastern Cooperative Oncology Group; NR, not reported; PC, prostate cancer; PSA, prostate-specific antigen; SD, standard deviation; TNM, Tumor Nodes Metastasis classification of malignant tumors. |

|                                         |
|-----------------------------------------|
| <b>Maier <i>et al</i>, 2014 (72)</b>    |
| Germany                                 |
| PC. Diagnosis: NR<br>Other details (NR) |

|                                                                                                                 |                                                                                                                |
|-----------------------------------------------------------------------------------------------------------------|----------------------------------------------------------------------------------------------------------------|
| Population (further details): familial and unselected (NR)                                                      |                                                                                                                |
| Treatment (further details): NR (NR)                                                                            |                                                                                                                |
| Familial (n=382)                                                                                                | Unselected (n=92)                                                                                              |
| Mean age (SD): 61.1 (NR)<br>Median age (range): NR (42, 80)                                                     | Mean age (SD): 55.8 (NR)<br>Median age (range): NR (29, 60)                                                    |
| Ethnicity: NR                                                                                                   | Ethnicity: NR                                                                                                  |
| Gleason score: Gleason $\leq 7$ and <GIII (71.5); Gleason >7 or GIII (18.3); unknown Gleason and grading (10.2) | Gleason score: Gleason $\leq 7$ and <GIII (82.6); Gleason >7 or GIII (15.2); unknown Gleason and grading (2.2) |
| AJCC stage: NR                                                                                                  | AJCC stage: NR                                                                                                 |
| TNM stage: T1 (2.1); T2 (55.2); T3 (27.2); T4 (5.2); Tx or not recorded (10.2)                                  | TNM stage: T1 (1.1); T2 (56.5); T3 (35.9); T4 (4.3); Tx or not recorded (2.2)                                  |
| ECOG score<br>0: NR<br>1: NR<br>0-1: NR<br>$\geq 2$ : NR                                                        | ECOG score<br>0: NR<br>1: NR<br>0-1: NR<br>$\geq 2$ : NR                                                       |
| Previous treatments: NR                                                                                         | Previous treatments: Radical prostatectomy                                                                     |
| Familial history of PC: 382 (100)                                                                               | Familial history of PC: 0 (0)                                                                                  |
| Mean years since diagnosis (SD): NR (NR)<br>Median years since diagnosis (range): NR (NR)                       | Mean years since diagnosis (SD): NR (NR)<br>Median years since diagnosis (range): NR (NR)                      |
| Mean PSA ng/ml (SD): NR (NR)<br>Median PSA ng/ml (range): 9.6 (0.2, 1300)                                       | Mean PSA ng/ml (SD): NR (NR)<br>Median PSA ng/ml (range): 8.2 (0.5, 94)                                        |
| Comments: Lymph node involvement also reported (pN0, pN1, Nx); PSA level unknown in n=84                        | Comments: Lymph node involvement also reported (pN0, pN1, Nx); PSA level unknown in n=6                        |

AJCC, American Joint Committee on Cancer; ECOG, Eastern Cooperative Oncology Group; NR, not reported; PC, prostate cancer; PSA, prostate-specific antigen; SD, standard deviation; TNM, Tumor Nodes Metastasis classification of malignant tumors.

|                                                                                                                        |
|------------------------------------------------------------------------------------------------------------------------|
| <b>Manson-Bahr <i>et al</i>, 2015 (73)</b>                                                                             |
| UK                                                                                                                     |
| PC. Diagnosis: Histology<br>Other details (NR)                                                                         |
| Population (further details): unselected (NR)                                                                          |
| Treatment (further details): NR (NR)                                                                                   |
| Total (n=63)                                                                                                           |
| Mean age (SD): NR (NR)<br>Median age (range): NR (56, 85)                                                              |
| Ethnicity: NR                                                                                                          |
| Gleason score: 6 (13); 7 (60); 8 (13); 9 (14)                                                                          |
| AJCC stage: NR                                                                                                         |
| TNM stage: NR                                                                                                          |
| ECOG score<br>0: NR<br>1: NR<br>0-1: NR<br>≥2: NR                                                                      |
| Previous treatments: Hormone Therapy (27); Active Surveillance (8); Radiotherapy (40); Brachytherapy (6); Surgery (19) |
| Familial history of PC: NR                                                                                             |

|                                                                                                                                                                                                                                                                        |
|------------------------------------------------------------------------------------------------------------------------------------------------------------------------------------------------------------------------------------------------------------------------|
| Mean years since diagnosis (SD): NR (NR)                                                                                                                                                                                                                               |
| Median years since diagnosis (range): NR (NR)                                                                                                                                                                                                                          |
| Mean PSA ng/ml (SD): NR (NR)                                                                                                                                                                                                                                           |
| Median PSA ng/ml (range): NR (5.5, 136)                                                                                                                                                                                                                                |
| Comments: Baseline details per individual data.                                                                                                                                                                                                                        |
| AJCC, American Joint Committee on Cancer; ECOG, Eastern Cooperative Oncology Group; NR, not reported; PC, prostate cancer; PSA, prostate-specific antigen; SD, standard deviation; TNM, Tumor Nodes Metastasis classification of malignant tumors; UK, United Kingdom. |

|                                                                                                                                                                                    |
|------------------------------------------------------------------------------------------------------------------------------------------------------------------------------------|
| <b>Marshall <i>et al</i>, 2017 (74)</b>                                                                                                                                            |
| USA                                                                                                                                                                                |
| PC. Diagnosis: NR                                                                                                                                                                  |
| Other details ( $\geq 7$ Gleason score)                                                                                                                                            |
| Population (further details): familial (personal history of PC and $\geq 1$ close blood relative with breast, ovarian, pancreatic or prostate cancer; or a personal history of PC) |
| Treatment (further details): NR (NR)                                                                                                                                               |
| Total (n=92)                                                                                                                                                                       |
| Mean age (SD): NR (NR)                                                                                                                                                             |
| Median age (range): NR (NR)                                                                                                                                                        |
| Ethnicity: NR                                                                                                                                                                      |
| Gleason score: NR                                                                                                                                                                  |
| AJCC stage: NR                                                                                                                                                                     |
| TNM stage: NR                                                                                                                                                                      |

|                                                                                                                                                                                                                                                                                   |
|-----------------------------------------------------------------------------------------------------------------------------------------------------------------------------------------------------------------------------------------------------------------------------------|
| ECOG score                                                                                                                                                                                                                                                                        |
| 0: NR                                                                                                                                                                                                                                                                             |
| 1: NR                                                                                                                                                                                                                                                                             |
| 0-1: NR                                                                                                                                                                                                                                                                           |
| ≥2: NR                                                                                                                                                                                                                                                                            |
| Previous treatments: NR                                                                                                                                                                                                                                                           |
| Familial history of PC: 2 (1.4)                                                                                                                                                                                                                                                   |
| Mean years since diagnosis (SD): NR (NR)                                                                                                                                                                                                                                          |
| Median years since diagnosis (range): NR (NR)                                                                                                                                                                                                                                     |
| Mean PSA ng/ml (SD): NR (NR)                                                                                                                                                                                                                                                      |
| Median PSA ng/ml (range): NR (NR)                                                                                                                                                                                                                                                 |
| AJCC, American Joint Committee on Cancer; ECOG, Eastern Cooperative Oncology Group; NR, not reported; PC, prostate cancer; PSA, prostate-specific antigen; SD, standard deviation; TNM, Tumor Nodes Metastasis classification of malignant tumors; USA, United States of America. |

|                                                                   |
|-------------------------------------------------------------------|
| <b>Mateo <i>et al</i>, 2015 (75)</b>                              |
| UK                                                                |
| mCRPC. Diagnosis: Histology                                       |
| Other details (NR)                                                |
| Population (further details): unselected (NR)                     |
| Treatment (further details): Olaparib (400 mg tablet twice daily) |
| Total (n=50)                                                      |



|                                                                                                                                                                                                                                                                                                                      |
|----------------------------------------------------------------------------------------------------------------------------------------------------------------------------------------------------------------------------------------------------------------------------------------------------------------------|
| Mean age (SD): NR (NR)<br>Median age (range): 67.5 (40.8, 79.3)                                                                                                                                                                                                                                                      |
| Ethnicity: NR                                                                                                                                                                                                                                                                                                        |
| Gleason score: NR                                                                                                                                                                                                                                                                                                    |
| AJCC stage: NR                                                                                                                                                                                                                                                                                                       |
| TNM stage: NR                                                                                                                                                                                                                                                                                                        |
| ECOG score<br>0: 9 (18)<br>1: 35 (70)<br>0-1: NR<br>≥2: 6 (12)                                                                                                                                                                                                                                                       |
| Previous treatments: Docetaxel (100); abiraterone acetate (96); cabazitaxel (58); radical prostatectomy or radiotherapy (50); castration (chemical or surgical) (100); enzalutamide (28); radium-223 (2).                                                                                                            |
| Familial history of PC: NR                                                                                                                                                                                                                                                                                           |
| Mean years since diagnosis (SD): NR (NR)<br>Median years since diagnosis (range): 5 (NR)                                                                                                                                                                                                                             |
| Mean PSA ng/ml (SD): NR (NR)<br>Median PSA ng/ml (range): 349.5 (NR)                                                                                                                                                                                                                                                 |
| Comments: Circulating tumor-cell count (cells/7.5ml blood) was median 37 (IQR 14-110)                                                                                                                                                                                                                                |
| AJCC, American Joint Committee on Cancer; CRPC, castration-resistant PC; ECOG, Eastern Cooperative Oncology Group; m, metastatic; NR, not reported; PC, prostate cancer; PSA, prostate-specific antigen; SD, standard deviation; TNM, Tumor Nodes Metastasis classification of malignant tumors; UK, United Kingdom. |

**Meyer *et al*, 2007 (25)**

|                                                                  |                                                                        |
|------------------------------------------------------------------|------------------------------------------------------------------------|
| Germany                                                          |                                                                        |
| Primary PC. Diagnosis: Histology                                 |                                                                        |
| Other details (Clinically localized low risk early PC)           |                                                                        |
| Population (further details): treatment (Brachytherapy I 125)    |                                                                        |
| Treatment (further details): Brachytherapy I 125 (160 Gy)        |                                                                        |
| DDR+ (n=25)                                                      | DDR- (n=236)                                                           |
| Mean age (SD): 63.8 (NR)                                         | Mean age (SD): 65.5 (NR)                                               |
| Median age (range): NR (NR)                                      | Median age (range): NR (NR)                                            |
| Ethnicity: NR                                                    | Ethnicity: NR                                                          |
| Gleason score: 3 (0); 4 (12); 5 (8); 6 (605); 7 (20); 8 (0)      | Gleason score: 3 (1.5); 4 (5.9); 5 (19.9); 6 (69.5); 7 (2.5); 8 (0.3)  |
| AJCC stage: NR                                                   | AJCC stage: NR                                                         |
| TNM stage: cT1c (0); cT2a (80); cT2b (12); cT2c (8); unknown (0) | TNM stage: cT1c (2); cT2a (73.7); cT2b (19); cT2c (1.7); unknown (3.4) |
| ECOG score                                                       | ECOG score                                                             |
| 0: NR                                                            | 0: NR                                                                  |
| 1: NR                                                            | 1: NR                                                                  |
| 0-1: NR                                                          | 0-1: NR                                                                |
| ≥2: NR                                                           | ≥2: NR                                                                 |
| Previous treatments: neoadjuvant hormone therapy (7)             | Previous treatments: neoadjuvant hormone therapy (67)                  |
| Familial history of PC: NR                                       | Familial history of PC: NR                                             |
| Mean years since diagnosis (SD): NR (NR)                         | Mean years since diagnosis (SD): NR (NR)                               |
| Median years since diagnosis (range): NR (NR)                    | Median years since diagnosis (range): NR (NR)                          |

|                                                                                                                                                                                                                                                                            |                                                                  |
|----------------------------------------------------------------------------------------------------------------------------------------------------------------------------------------------------------------------------------------------------------------------------|------------------------------------------------------------------|
| Mean PSA ng/ml (SD): 6.6 (NR)<br>Median PSA ng/ml (range): NR (NR)                                                                                                                                                                                                         | Mean PSA ng/ml (SD): 7 (NR)<br>Median PSA ng/ml (range): NR (NR) |
| Comments: Mean PSA, Gleason and age are for carriers of P1054R variant                                                                                                                                                                                                     | Comments:                                                        |
| AJCC, American Joint Committee on Cancer; DDR, DNA damage repair; ECOG, Eastern Cooperative Oncology Group; NR, not reported; PC, prostate cancer; PSA, prostate-specific antigen; SD, standard deviation; TNM, Tumor Nodes Metastasis classification of malignant tumors. |                                                                  |

|                                                       |                                                       |
|-------------------------------------------------------|-------------------------------------------------------|
| <b>Myers <i>et al</i>, 2016 (76)</b>                  |                                                       |
| USA                                                   |                                                       |
| PC. Diagnosis: NR<br>Other details (NR)               |                                                       |
| Population (further details): unselected (NR)         |                                                       |
| Treatment (further details): NR (NR)                  |                                                       |
| DDR+ (n=12)                                           | DDR- (n=73)                                           |
| Mean age (SD): 58 (NR)<br>Median age (range): NR (NR) | Mean age (SD): 62 (NR)<br>Median age (range): NR (NR) |
| Ethnicity: NR                                         | Ethnicity: NR                                         |
| Gleason score: NR                                     | Gleason score: NR                                     |
| AJCC stage: NR                                        | AJCC stage: NR                                        |
| TNM stage: NR                                         | TNM stage: NR                                         |

|                                                                                                                                                                                                                                                                                                           |                                                                                           |
|-----------------------------------------------------------------------------------------------------------------------------------------------------------------------------------------------------------------------------------------------------------------------------------------------------------|-------------------------------------------------------------------------------------------|
| ECOG score<br>0: NR<br>1: NR<br>0-1: NR<br>≥2: NR                                                                                                                                                                                                                                                         | ECOG score<br>0: NR<br>1: NR<br>0-1: NR<br>≥2: NR                                         |
| Previous treatments: NR                                                                                                                                                                                                                                                                                   | Previous treatments: NR                                                                   |
| Familial history of PC: NR                                                                                                                                                                                                                                                                                | Familial history of PC: NR                                                                |
| Mean years since diagnosis (SD): NR (NR)<br>Median years since diagnosis (range): NR (NR)                                                                                                                                                                                                                 | Mean years since diagnosis (SD): NR (NR)<br>Median years since diagnosis (range): NR (NR) |
| Mean PSA ng/ml (SD): NR (NR)<br>Median PSA ng/ml (range): NR (NR)                                                                                                                                                                                                                                         | Mean PSA ng/ml (SD): NR (NR)<br>Median PSA ng/ml (range): NR (NR)                         |
| AJCC, American Joint Committee on Cancer; DDR, DNA damage repair; ECOG, Eastern Cooperative Oncology Group; NR, not reported; PC, prostate cancer; PSA, prostate-specific antigen; SD, standard deviation; TNM, Tumor Nodes Metastasis classification of malignant tumors; USA, United States of America. |                                                                                           |

|                                                                  |                    |
|------------------------------------------------------------------|--------------------|
| <b>Na et al, 2017 (77)</b>                                       |                    |
| Multi-national                                                   |                    |
| Other and Primary PC. Diagnosis: NR<br>Other details (Lethal PC) |                    |
| Population (further details): unselected (NR)                    |                    |
| Treatment (further details): NR (NR)                             |                    |
| lethal (n=313)                                                   | Primary PC (n=486) |

|                                                                                                                                                                                                                                                    |                                                                                                                                                     |
|----------------------------------------------------------------------------------------------------------------------------------------------------------------------------------------------------------------------------------------------------|-----------------------------------------------------------------------------------------------------------------------------------------------------|
| Mean age (SD): NR (NR)<br>Median age (range): 62 (NR)                                                                                                                                                                                              | Mean age (SD): NR (NR)<br>Median age (range): 65 (NR)                                                                                               |
| Ethnicity: European American (83.4); African American (9.6); Chinese (7.0)                                                                                                                                                                         | Ethnicity: European American (72.4); African American (18.3); Chinese (9.3)                                                                         |
| Gleason score: NR                                                                                                                                                                                                                                  | Gleason score: NR                                                                                                                                   |
| AJCC stage: NR                                                                                                                                                                                                                                     | AJCC stage: NR                                                                                                                                      |
| TNM stage: NR                                                                                                                                                                                                                                      | TNM stage: NR                                                                                                                                       |
| ECOG score<br>0: NR<br>1: NR<br>0-1: NR<br>≥2: NR                                                                                                                                                                                                  | ECOG score<br>0: NR<br>1: NR<br>0-1: NR<br>≥2: NR                                                                                                   |
| Previous treatments: NR                                                                                                                                                                                                                            | Previous treatments: NR                                                                                                                             |
| Familial history of PC: NR                                                                                                                                                                                                                         | Familial history of PC: NR                                                                                                                          |
| Mean years since diagnosis (SD): NR (NR)<br>Median years since diagnosis (range): NR (NR)                                                                                                                                                          | Mean years since diagnosis (SD): NR (NR)<br>Median years since diagnosis (range): NR (NR)                                                           |
| Mean PSA ng/ml (SD): NR (NR)<br>Median PSA ng/ml (range): 13.1 (NR)                                                                                                                                                                                | Mean PSA ng/ml (SD): NR (NR)<br>Median PSA ng/ml (range): 5.3 (NR)                                                                                  |
| Comments: Outcomes based on ethnicity in lethal vs localized PC are also available but not extracted (European American, African American, Chinese)                                                                                                | Comments: Outcomes based on ethnicity in lethal vs localized PC are also available but not extracted (European American, African American, Chinese) |
| AJCC, American Joint Committee on Cancer; ECOG, Eastern Cooperative Oncology Group; NR, not reported; PC, prostate cancer; PSA, prostate-specific antigen; SD, standard deviation; TNM, Tumor Nodes Metastasis classification of malignant tumors. |                                                                                                                                                     |

|                                                                 |
|-----------------------------------------------------------------|
| <b>Nam <i>et al</i>, 2005 (15)</b>                              |
| Canada                                                          |
| PC. Diagnosis: Histology                                        |
| Other details (NR)                                              |
| Population (further details): unselected (NR)                   |
| Treatment (further details): NR (NR)                            |
| Total (n=996)                                                   |
| Mean age (SD): 66.2 (NR)                                        |
| Median age (range): NR (NR)                                     |
| Ethnicity: White (84.1); Black (11.0); Asian (2.9); Other (1.8) |
| Gleason score: NR                                               |
| AJCC stage: NR                                                  |
| TNM stage: NR                                                   |
| ECOG score                                                      |
| 0: NR                                                           |
| 1: NR                                                           |
| 0-1: NR                                                         |
| ≥2: NR                                                          |
| Previous treatments: NR                                         |
| Familial history of PC: 163 (16.3)                              |
| Mean years since diagnosis (SD): NR (NR)                        |
| Median years since diagnosis (range): NR (NR)                   |

|                                                                                                                                                                                                                                                    |
|----------------------------------------------------------------------------------------------------------------------------------------------------------------------------------------------------------------------------------------------------|
| Mean PSA ng/ml (SD): NR (NR)                                                                                                                                                                                                                       |
| Median PSA ng/ml (range): NR (NR)                                                                                                                                                                                                                  |
| Comments: PSA levels (ng/ml) $\leq$ 4.0 (5.7%); 4.1-10.0 (56.8%); 10.1-20.0 (26.2%); >20.0 (11.2%)                                                                                                                                                 |
| AJCC, American Joint Committee on Cancer; ECOG, Eastern Cooperative Oncology Group; NR, not reported; PC, prostate cancer; PSA, prostate-specific antigen; SD, standard deviation; TNM, Tumor Nodes Metastasis classification of malignant tumors. |

|                                                       |
|-------------------------------------------------------|
| <b>Naslund Koch <i>et al</i>, 2016 (16)</b>           |
| Denmark                                               |
| PC. Diagnosis: NR<br>Other details (NR)               |
| Population (further details): unselected (NR)         |
| Treatment (further details): NR (NR)                  |
| Total (n=39014)                                       |
| Mean age (SD): NR (NR)<br>Median age (range): NR (NR) |
| Ethnicity: NR                                         |
| Gleason score: NR                                     |
| AJCC stage: NR                                        |
| TNM stage: NR                                         |

|                                                                                                                                                                                                                                                    |
|----------------------------------------------------------------------------------------------------------------------------------------------------------------------------------------------------------------------------------------------------|
| ECOG score<br>0: NR<br>1: NR<br>0-1: NR<br>≥2: NR                                                                                                                                                                                                  |
| Previous treatments: NR                                                                                                                                                                                                                            |
| Familial history of PC: NR                                                                                                                                                                                                                         |
| Mean years since diagnosis (SD): NR (NR)<br>Median years since diagnosis (range): NR (NR)                                                                                                                                                          |
| Mean PSA ng/ml (SD): NR (NR)<br>Median PSA ng/ml (range): NR (NR)                                                                                                                                                                                  |
| Comments: Although age and family history were specified, this was only presented for the full cohort of 86,922 subjects (no details were provided regarding the male cohort).                                                                     |
| AJCC, American Joint Committee on Cancer; ECOG, Eastern Cooperative Oncology Group; NR, not reported; PC, prostate cancer; PSA, prostate-specific antigen; SD, standard deviation; TNM, Tumor Nodes Metastasis classification of malignant tumors. |

|                                                                                                                                         |
|-----------------------------------------------------------------------------------------------------------------------------------------|
| <b>Nastiuk <i>et al</i>, 1999 (78)</b>                                                                                                  |
| USA                                                                                                                                     |
| PC. Diagnosis: NR<br>Other details (Archival records from New York University and Columbia Presbyterian medical centers for stage B PC) |
| Population (further details): Ashkenazi (NR)                                                                                            |
| Treatment (further details): NR (NR)                                                                                                    |
| Total (n=83)                                                                                                                            |



|                                                                                                                                                                                                                                                                                   |
|-----------------------------------------------------------------------------------------------------------------------------------------------------------------------------------------------------------------------------------------------------------------------------------|
| Mean age (SD): NR (NR)                                                                                                                                                                                                                                                            |
| Median age (range): NR (NR)                                                                                                                                                                                                                                                       |
| Ethnicity: Ashkenazi Jewish men (100)                                                                                                                                                                                                                                             |
| Gleason score: NR                                                                                                                                                                                                                                                                 |
| AJCC stage: NR                                                                                                                                                                                                                                                                    |
| TNM stage: NR                                                                                                                                                                                                                                                                     |
| ECOG score<br>0: NR<br>1: NR<br>0-1: NR<br>≥2: NR                                                                                                                                                                                                                                 |
| Previous treatments: NR                                                                                                                                                                                                                                                           |
| Familial history of PC: NR                                                                                                                                                                                                                                                        |
| Mean years since diagnosis (SD): NR (NR)                                                                                                                                                                                                                                          |
| Median years since diagnosis (range): NR (NR)                                                                                                                                                                                                                                     |
| Mean PSA ng/ml (SD): NR (NR)                                                                                                                                                                                                                                                      |
| Median PSA ng/ml (range): NR (NR)                                                                                                                                                                                                                                                 |
| Comments: Only looking at PC, no controls, using earlier paper for cohort control (Roa BB, Boyd AA, Volcik K, Richards CS. Ashkenazi Jewish population frequencies for common mutations in BRCA1 and BRCA2. Nat. Genet. 1996; 14:185-187. [PubMed: 8841191]).                     |
| AJCC, American Joint Committee on Cancer; ECOG, Eastern Cooperative Oncology Group; NR, not reported; PC, prostate cancer; PSA, prostate-specific antigen; SD, standard deviation; TNM, Tumor Nodes Metastasis classification of malignant tumors; USA, United States of America. |

**Nelson *et al*, 2016 (79)**

|                                               |
|-----------------------------------------------|
| Multi-national                                |
| mPC. Diagnosis: NR                            |
| Other details (NR)                            |
| Population (further details): unselected (NR) |
| Treatment (further details): NR (NR)          |
| Total (n=569)                                 |
| Mean age (SD): NR (NR)                        |
| Median age (range): NR (NR)                   |
| Ethnicity: NR                                 |
| Gleason score: NR                             |
| AJCC stage: NR                                |
| TNM stage: NR                                 |
| ECOG score                                    |
| 0: NR                                         |
| 1: NR                                         |
| 0-1: NR                                       |
| ≥2: NR                                        |
| Previous treatments: NR                       |
| Familial history of PC: NR                    |
| Mean years since diagnosis (SD): NR (NR)      |
| Median years since diagnosis (range): NR (NR) |
| Mean PSA ng/ml (SD): NR (NR)                  |
| Median PSA ng/ml (range): NR (NR)             |

|                                                                                                                                                                                                                                                    |
|----------------------------------------------------------------------------------------------------------------------------------------------------------------------------------------------------------------------------------------------------|
| Comments: No patient characteristics provided                                                                                                                                                                                                      |
| AJCC, American Joint Committee on Cancer; ECOG, Eastern Cooperative Oncology Group; NR, not reported; PC, prostate cancer; PSA, prostate-specific antigen; SD, standard deviation; TNM, Tumor Nodes Metastasis classification of malignant tumors. |

|                                                                               |
|-------------------------------------------------------------------------------|
| <b>Nguyen <i>et al</i>, 2011 (80)</b>                                         |
| USA                                                                           |
| Primary PC. Diagnosis: NR<br>Other details (NR)                               |
| Population (further details): treatment (external radiation or brachytherapy) |
| Treatment (further details): external radiation or brachytherapy (NR)         |
| Total (n=612)                                                                 |
| Mean age (SD): NR (NR)<br>Median age (range): NR (NR)                         |
| Ethnicity: NR                                                                 |
| Gleason score: NR                                                             |
| AJCC stage: NR                                                                |
| TNM stage: NR                                                                 |
| ECOG score<br>0: NR<br>1: NR<br>0-1: NR<br>≥2: NR                             |
| Previous treatments: NR                                                       |

|                                                                                                                                                                                                                                                                                   |
|-----------------------------------------------------------------------------------------------------------------------------------------------------------------------------------------------------------------------------------------------------------------------------------|
| Familial history of PC: NR                                                                                                                                                                                                                                                        |
| Mean years since diagnosis (SD): NR (NR)<br>Median years since diagnosis (range): NR (NR)                                                                                                                                                                                         |
| Mean PSA ng/ml (SD): NR (NR)<br>Median PSA ng/ml (range): NR (NR)                                                                                                                                                                                                                 |
| AJCC, American Joint Committee on Cancer; ECOG, Eastern Cooperative Oncology Group; NR, not reported; PC, prostate cancer; PSA, prostate-specific antigen; SD, standard deviation; TNM, Tumor Nodes Metastasis classification of malignant tumors; USA, United States of America. |

|                                                                                                                              |
|------------------------------------------------------------------------------------------------------------------------------|
| <b>Nicolas <i>et al</i>, 2015 (24)</b>                                                                                       |
| USA                                                                                                                          |
| PC. Diagnosis: Histology<br>Other details (NR)                                                                               |
| Population (further details): familial (NR)                                                                                  |
| Treatment (further details): NR (NR)                                                                                         |
| Total (n=12)                                                                                                                 |
| Mean age (SD): 57.8 (NR)<br>Median age (range): NR (41, 68)                                                                  |
| Ethnicity: Caucasian (100), Hispanic (0)                                                                                     |
| Gleason score: 6 (41.7); 7 (50); 8 (8.3)                                                                                     |
| AJCC stage: NR                                                                                                               |
| TNM stage: T2cN0MX (41.7); T2aN0MX (8.3); T3bN0MX (8.3); T2cN0MX (8.3); T3aN0MX (8.3); T1c (8.3); T3bN1M0 (8.3); T2cNO (8.3) |
| ECOG score<br>0: NR<br>1: NR<br>0-1: NR<br>≥2: NR                                                                            |
| Previous treatments: NR                                                                                                      |
| Familial history of PC: 12 (100)                                                                                             |
| Mean years since diagnosis (SD): NR (NR)<br>Median years since diagnosis (range): NR (NR)                                    |

|                                                                                                                                                                                                                                                                                   |
|-----------------------------------------------------------------------------------------------------------------------------------------------------------------------------------------------------------------------------------------------------------------------------------|
| Mean PSA ng/ml (SD): NR (NR)                                                                                                                                                                                                                                                      |
| Median PSA ng/ml (range): NR (NR)                                                                                                                                                                                                                                                 |
| AJCC, American Joint Committee on Cancer; ECOG, Eastern Cooperative Oncology Group; NR, not reported; PC, prostate cancer; PSA, prostate-specific antigen; SD, standard deviation; TNM, Tumor Nodes Metastasis classification of malignant tumors; USA, United States of America. |

|                                                       |
|-------------------------------------------------------|
| <b>Nicolosi <i>et al</i>, 2017 (81)</b>               |
| USA                                                   |
| PC. Diagnosis: NR<br>Other details (NR)               |
| Population (further details): unselected (NR)         |
| Treatment (further details): NR (NR)                  |
| Total (n=1158)                                        |
| Mean age (SD): NR (NR)<br>Median age (range): NR (NR) |
| Ethnicity: NR                                         |
| Gleason score: NR                                     |
| AJCC stage: NR                                        |
| TNM stage: NR                                         |

|                                                                                                                                                                                                                                                                                   |
|-----------------------------------------------------------------------------------------------------------------------------------------------------------------------------------------------------------------------------------------------------------------------------------|
| ECOG score                                                                                                                                                                                                                                                                        |
| 0: NR                                                                                                                                                                                                                                                                             |
| 1: NR                                                                                                                                                                                                                                                                             |
| 0-1: NR                                                                                                                                                                                                                                                                           |
| ≥2: NR                                                                                                                                                                                                                                                                            |
| Previous treatments: NR                                                                                                                                                                                                                                                           |
| Familial history of PC: NR                                                                                                                                                                                                                                                        |
| Mean years since diagnosis (SD): NR (NR)                                                                                                                                                                                                                                          |
| Median years since diagnosis (range): NR (NR)                                                                                                                                                                                                                                     |
| Mean PSA ng/ml (SD): NR (NR)                                                                                                                                                                                                                                                      |
| Median PSA ng/ml (range): NR (NR)                                                                                                                                                                                                                                                 |
| Comments: No patient characteristics provided                                                                                                                                                                                                                                     |
| AJCC, American Joint Committee on Cancer; ECOG, Eastern Cooperative Oncology Group; NR, not reported; PC, prostate cancer; PSA, prostate-specific antigen; SD, standard deviation; TNM, Tumor Nodes Metastasis classification of malignant tumors; USA, United States of America. |

|                                                     |
|-----------------------------------------------------|
| <b>Nientiedt <i>et al</i>, 2017 (82)</b>            |
| Germany                                             |
| mCRPC. Diagnosis: Histology                         |
| Other details (NR)                                  |
| Population (further details): treatment (docetaxel) |
| Treatment (further details): docetaxel (NR)         |
| Total (n=53)                                        |

|                                                                                                                                                                                                                                                                                   |
|-----------------------------------------------------------------------------------------------------------------------------------------------------------------------------------------------------------------------------------------------------------------------------------|
| Mean age (SD): NR (NR)<br>Median age (range): 63 (40, 78)                                                                                                                                                                                                                         |
| Ethnicity: NR                                                                                                                                                                                                                                                                     |
| Gleason score: 3+4 (9.4); 4+3 (9.4); 8 (9.4); 9-10 (69.8); unknown (1.9)                                                                                                                                                                                                          |
| AJCC stage: NR                                                                                                                                                                                                                                                                    |
| TNM stage: T2 (7.5); T3 (69.8); T4 (13.2); Tx (9.4); N0 (35.8); N1 (52.8); Nx (11.3); M0 (54.7); M1 (41.5); Mx (3.8)                                                                                                                                                              |
| ECOG score<br>0: 30 (56.6)<br>1: 21 (39.6)<br>0-1: 2 (3.8)<br>≥2: 0                                                                                                                                                                                                               |
| Previous treatments: Radical prostatectomy (77.4) Primary radiotherapy (1.9) Androgen deprivation therapy (100) Adjuvant radiotherapy (24.5) Salvage radiotherapy (13.2) Enzalutamide and/or Abiraterone (15.1)                                                                   |
| Familial history of PC: NR                                                                                                                                                                                                                                                        |
| Mean years since diagnosis (SD): NR (NR)<br>Median years since diagnosis (range): NR (NR)                                                                                                                                                                                         |
| Mean PSA ng/ml (SD): NR (NR)<br>Median PSA ng/ml (range): 30 (0.6, 6782)                                                                                                                                                                                                          |
| Comments: Population also included primary metastatic PC; Treatment prior to docetaxel is reported                                                                                                                                                                                |
| AJCC, American Joint Committee on Cancer; CRPC, castration-resistant PC; ECOG, Eastern Cooperative Oncology Group; NR, not reported; PC, prostate cancer; PSA, prostate-specific antigen; SD, standard deviation; TNM, Tumor Nodes Metastasis classification of malignant tumors. |

**Palapattu *et al*, 2015 (20)**



|                                                                                           |
|-------------------------------------------------------------------------------------------|
| USA                                                                                       |
| PC. Diagnosis: NR<br>Other details (NR)                                                   |
| Population (further details): unselected (NR)                                             |
| Treatment (further details): NR (NR)                                                      |
| Total (n=9)                                                                               |
| Mean age (SD): NR (NR)<br>Median age (range): NR (NR)                                     |
| Ethnicity: NR                                                                             |
| Gleason score: 7 (56)                                                                     |
| AJCC stage: NR                                                                            |
| TNM stage: NR                                                                             |
| ECOG score<br>0: NR<br>1: NR<br>0-1: NR<br>≥2: NR                                         |
| Previous treatments: NR                                                                   |
| Familial history of PC: NR                                                                |
| Mean years since diagnosis (SD): NR (NR)<br>Median years since diagnosis (range): NR (NR) |
| Mean PSA ng/ml (SD): NR (NR)<br>Median PSA ng/ml (range): NR (NR)                         |

|                                                                                                                                                                                                                                                                                   |
|-----------------------------------------------------------------------------------------------------------------------------------------------------------------------------------------------------------------------------------------------------------------------------------|
| Comments: Gleason score all start at 6, after 1 year 5 of 9 are at GS7                                                                                                                                                                                                            |
| AJCC, American Joint Committee on Cancer; ECOG, Eastern Cooperative Oncology Group; NR, not reported; PC, prostate cancer; PSA, prostate-specific antigen; SD, standard deviation; TNM, Tumor Nodes Metastasis classification of malignant tumors; USA, United States of America. |

|                                                       |
|-------------------------------------------------------|
| <b>Patel <i>et al</i>, 2016 (83)</b>                  |
| USA                                                   |
| PC. Diagnosis: NR<br>Other details (NR)               |
| Population (further details): unselected (NR)         |
| Treatment (further details): NR (NR)                  |
| Total (n=327)                                         |
| Mean age (SD): NR (NR)<br>Median age (range): NR (NR) |
| Ethnicity: NR                                         |
| Gleason score: NR                                     |
| AJCC stage: NR                                        |
| TNM stage: NR                                         |
| ECOG score<br>0: NR<br>1: NR<br>0-1: NR<br>≥2: NR     |

|                                                                                                                                                                                                                                                                                                           |
|-----------------------------------------------------------------------------------------------------------------------------------------------------------------------------------------------------------------------------------------------------------------------------------------------------------|
| Previous treatments: NR                                                                                                                                                                                                                                                                                   |
| Familial history of PC: NR                                                                                                                                                                                                                                                                                |
| Mean years since diagnosis (SD): NR (NR)                                                                                                                                                                                                                                                                  |
| Median years since diagnosis (range): NR (NR)                                                                                                                                                                                                                                                             |
| Mean PSA ng/ml (SD): NR (NR)                                                                                                                                                                                                                                                                              |
| Median PSA ng/ml (range): NR (NR)                                                                                                                                                                                                                                                                         |
| AJCC, American Joint Committee on Cancer; DDR, DNA damage repair; ECOG, Eastern Cooperative Oncology Group; NR, not reported; PC, prostate cancer; PSA, prostate-specific antigen; SD, standard deviation; TNM, Tumor Nodes Metastasis classification of malignant tumors; USA, United States of America. |

|                                                           |
|-----------------------------------------------------------|
| <b>Petrovics <i>et al</i>, 2016 (84)</b>                  |
| USA                                                       |
| PC. Diagnosis: NR                                         |
| Other details (NR)                                        |
| Population (further details): unselected (NR)             |
| Treatment (further details): NR (NR)                      |
| Total (n=857)                                             |
| Mean age (SD): NR (NR)                                    |
| Median age (range): NR (NR)                               |
| Ethnicity: African American (NR); Caucasian American (NR) |
| Gleason score:                                            |
| AJCC stage: NR                                            |
| TNM stage: NR                                             |

|                                                                                                                                                                                                                                                                                   |
|-----------------------------------------------------------------------------------------------------------------------------------------------------------------------------------------------------------------------------------------------------------------------------------|
| ECOG score<br>0: NR<br>1: NR<br>0-1: NR<br>≥2: NR                                                                                                                                                                                                                                 |
| Previous treatments: NR                                                                                                                                                                                                                                                           |
| Familial history of PC: NR                                                                                                                                                                                                                                                        |
| Mean years since diagnosis (SD): NR (NR)<br>Median years since diagnosis (range): NR (NR)                                                                                                                                                                                         |
| Mean PSA ng/ml (SD): NR (NR)<br>Median PSA ng/ml (range): NR (NR)                                                                                                                                                                                                                 |
| AJCC, American Joint Committee on Cancer; ECOG, Eastern Cooperative Oncology Group; NR, not reported; PC, prostate cancer; PSA, prostate-specific antigen; SD, standard deviation; TNM, Tumor Nodes Metastasis classification of malignant tumors; USA, United States of America. |

|                                                                                                                         |            |              |
|-------------------------------------------------------------------------------------------------------------------------|------------|--------------|
| <b>Pomerantz <i>et al</i>, 2017 (85)</b>                                                                                |            |              |
| USA                                                                                                                     |            |              |
| mCRPC. Diagnosis: NR<br>Other details (NR)                                                                              |            |              |
| Population (further details): treatment (Carboplatin-based chemotherapy)                                                |            |              |
| Treatment (further details): Carboplatin/docetaxel-based chemotherapy (At least two doses of carboplatin and docetaxel) |            |              |
| Total (n=141)                                                                                                           | DDR+ (n=8) | DDR- (n=133) |

|                                                                                                   |                                                                                                   |                                                                                                   |
|---------------------------------------------------------------------------------------------------|---------------------------------------------------------------------------------------------------|---------------------------------------------------------------------------------------------------|
| Mean age (SD): NR (NR)<br>Median age (range): 59 (40, 80)                                         | Mean age (SD): NR (NR)<br>Median age (range): 53 (40, 62)                                         | Mean age (SD): NR (NR)<br>Median age (range): 60 (40, 80)                                         |
| Ethnicity: European American (87.2); African American (2.8); Hispanic (1.4); Unknown (8.5)        | Ethnicity: European American (100); African American (0); Hispanic (0); Unknown (0)               | Ethnicity: European American (86.5); African American (3); Hispanic (1.5); Unknown (9)            |
| Gleason score: 6 (6.4); 7 (22); 8-10 (62.4); unknown (9.2)                                        | Gleason score: 6 (0); 7 (12.5); 8-10 (75); unknown (12.5)                                         | Gleason score: 6 (6.8); 7 (22.6); 8-10 (61.7); unknown (9)                                        |
| AJCC stage: NR                                                                                    | AJCC stage: NR                                                                                    | AJCC stage: NR                                                                                    |
| TNM stage: NR                                                                                     | TNM stage: NR                                                                                     | TNM stage: NR                                                                                     |
| ECOG score<br>0: NR<br>1: NR<br>0-1: NR<br>≥2: NR                                                 | ECOG score<br>0: NR<br>1: NR<br>0-1: NR<br>≥2: NR                                                 | ECOG score<br>0: NR<br>1: NR<br>0-1: NR<br>≥2: NR                                                 |
| Previous treatments: NR                                                                           | Previous treatments: NR                                                                           | Previous treatments: NR                                                                           |
| Familial history of PC: 26 (18.4)                                                                 | Familial history of PC: 2 (25)                                                                    | Familial history of PC: 24 (18)                                                                   |
| Mean years since diagnosis (SD): 6.3 (NR)<br>Median years since diagnosis (range): NR (0.5, 20.7) | Mean years since diagnosis (SD): 4.5 (NR)<br>Median years since diagnosis (range): NR (1.1, 13.7) | Mean years since diagnosis (SD): 6.3 (NR)<br>Median years since diagnosis (range): NR (0.5, 20.7) |
| Mean PSA ng/ml (SD): 170 (NR)<br>Median PSA ng/ml (range): NR (0, 9145)                           | Mean PSA ng/ml (SD): 49 (NR)<br>Median PSA ng/ml (range): NR (1, 515)                             | Mean PSA ng/ml (SD): 204 (NR)<br>Median PSA ng/ml (range): NR (0, 9145)                           |
| Comments: PSA at diagnosis also available; PSA presented here is at start of chemo                | Comments: PSA at diagnosis also available; PSA presented here is at start of chemo                | Comments: PSA at diagnosis also available; PSA presented here is at start of chemo                |

AJCC, American Joint Committee on Cancer; DDR, DNA damage repair; ECOG, Eastern Cooperative Oncology Group; NR, not reported; PC, prostate cancer; PSA, prostate-specific antigen; SD, standard deviation; TNM, Tumor Nodes Metastasis classification of malignant tumors; USA, United States of America.

|                                                                                   |
|-----------------------------------------------------------------------------------|
| <b>Pritchard <i>et al</i>, 2014 (86)</b>                                          |
| USA                                                                               |
| mPC. Diagnosis: autopsy<br>Other details (primary and metastatic prostate cancer) |
| Population (further details): unselected (NR)                                     |
| Treatment (further details): NR (NR)                                              |
| Total (n=60)                                                                      |
| Mean age (SD): NR (NR)<br>Median age (range): NR (NR)                             |
| Ethnicity: NR                                                                     |
| Gleason score: NR                                                                 |
| AJCC stage: NR                                                                    |
| TNM stage: NR                                                                     |
| ECOG score<br>0: NR<br>1: NR<br>0-1: NR<br>≥2: NR                                 |
| Previous treatments: NR                                                           |

|                                                                                                                                                                                                                                                                                                  |
|--------------------------------------------------------------------------------------------------------------------------------------------------------------------------------------------------------------------------------------------------------------------------------------------------|
| Familial history of PC: NR                                                                                                                                                                                                                                                                       |
| Mean years since diagnosis (SD): NR (NR)                                                                                                                                                                                                                                                         |
| Median years since diagnosis (range): NR (NR)                                                                                                                                                                                                                                                    |
| Mean PSA ng/ml (SD): NR (NR)                                                                                                                                                                                                                                                                     |
| Median PSA ng/ml (range): NR (NR)                                                                                                                                                                                                                                                                |
| AJCC, American Joint Committee on Cancer; ECOG, Eastern Cooperative Oncology Group; m, metastatic; NR, not reported; PC, prostate cancer; PSA, prostate-specific antigen; SD, standard deviation; TNM, Tumor Nodes Metastasis classification of malignant tumors; USA, United States of America. |

|                                                                                                                                         |                                                                                                                                          |
|-----------------------------------------------------------------------------------------------------------------------------------------|------------------------------------------------------------------------------------------------------------------------------------------|
| <b>Pritchard <i>et al</i>, 2016 (87)</b>                                                                                                |                                                                                                                                          |
| Multi-national                                                                                                                          |                                                                                                                                          |
| mPC and Primary PC. Diagnosis: Histology                                                                                                |                                                                                                                                          |
| Other details (mPC cohort)                                                                                                              |                                                                                                                                          |
| Population (further details): unselected (NR)                                                                                           |                                                                                                                                          |
| Treatment (further details): NR (NR)                                                                                                    |                                                                                                                                          |
| mPC (n=692)                                                                                                                             | Primary PC (n=499)                                                                                                                       |
| Mean age (SD): <50 (7.2); 50-59 (31.7); 60-69 (43.5); 70-79 (13.6); ≥80 (1.9); unknown (2.2) (NR)                                       | Mean age (SD): <50 (5.4); 50-59 (35.4); 60-69 (48.7); 70-79 (10.4); ≥80 (0); unknown (0) (NR)                                            |
| Median age (range): NR (NR)                                                                                                             | Median age (range): NR (NR)                                                                                                              |
| Ethnicity: Non-Hispanic white (83.2); Hispanic (1.6); non-Hispanic black (5.8); Asian or Pacific Islander (1.7); other or unknown (7.7) | Ethnicity: Non-Hispanic white (81.4); Hispanic (1.4); non-Hispanic black (11.6); Asian or Pacific Islander (2.4); other or unknown (3.2) |
| Gleason score: ≤6 (6.07); 3+4 (9.4); 4+3 (13.3); 8-10 (55.2); unknown (16.0)                                                            | Gleason score: ≤6 (9.0); 3+4 (29.7); 4+3 (20.2); 8-10 (41.1); unknown (0)                                                                |

|                                                                                                                                                                                                                                                                   |                                                                                           |
|-------------------------------------------------------------------------------------------------------------------------------------------------------------------------------------------------------------------------------------------------------------------|-------------------------------------------------------------------------------------------|
| AJCC stage: NR                                                                                                                                                                                                                                                    | AJCC stage: NR                                                                            |
| TNM stage: NR                                                                                                                                                                                                                                                     | TNM stage: NR                                                                             |
| ECOG score<br>0: NR<br>1: NR<br>0-1: NR<br>≥2: NR                                                                                                                                                                                                                 | ECOG score<br>0: NR<br>1: NR<br>0-1: NR<br>≥2: NR                                         |
| Previous treatments: NR                                                                                                                                                                                                                                           | Previous treatments: NR                                                                   |
| Familial history of PC: 133 (19.2)                                                                                                                                                                                                                                | Familial history of PC: NR                                                                |
| Mean years since diagnosis (SD): NR (NR)<br>Median years since diagnosis (range): NR (NR)                                                                                                                                                                         | Mean years since diagnosis (SD): NR (NR)<br>Median years since diagnosis (range): NR (NR) |
| Mean PSA ng/ml (SD): NR (NR)<br>Median PSA ng/ml (range): NR (NR)                                                                                                                                                                                                 | Mean PSA ng/ml (SD): NR (NR)<br>Median PSA ng/ml (range): NR (NR)                         |
| AJCC, American Joint Committee on Cancer; ECOG, Eastern Cooperative Oncology Group; m, metastatic; NR, not reported; PC, prostate cancer; PSA, prostate-specific antigen; SD, standard deviation; TNM, Tumor Nodes Metastasis classification of malignant tumors. |                                                                                           |



|                                                                                                                                                                                                                                                                                                                          |
|--------------------------------------------------------------------------------------------------------------------------------------------------------------------------------------------------------------------------------------------------------------------------------------------------------------------------|
| <b>Pugh <i>et al</i>, 2009 (88)</b>                                                                                                                                                                                                                                                                                      |
| Canada                                                                                                                                                                                                                                                                                                                   |
| PC. Diagnosis: Histology and PSA<br>Other details (NR)                                                                                                                                                                                                                                                                   |
| Population (further details): treatment (Brachytherapy)                                                                                                                                                                                                                                                                  |
| Treatment (further details): Brachytherapy (Near-ideal rectal and prostate post-implant dosimetry: prostate D90 <175 Gy (dose covering 90% of the prostate <175 Gy), prostate V100 >85% (volume of the prostate covered by >85% of the radiation dose), and rectal VR100 <1.0 cm <sup>3</sup> (volume of the rectum rec) |
| Total (n=41)                                                                                                                                                                                                                                                                                                             |
| Mean age (SD): NR (NR)<br>Median age (range): NR (NR)                                                                                                                                                                                                                                                                    |
| Ethnicity: NR                                                                                                                                                                                                                                                                                                            |
| Gleason score: NR                                                                                                                                                                                                                                                                                                        |
| AJCC stage: 1C (58); 2A (32); 2B (10)                                                                                                                                                                                                                                                                                    |
| TNM stage: NR                                                                                                                                                                                                                                                                                                            |
| ECOG score<br>0: NR<br>1: NR<br>0-1: NR<br>≥2: NR                                                                                                                                                                                                                                                                        |
| Previous treatments: NR                                                                                                                                                                                                                                                                                                  |
| Familial history of PC: NR                                                                                                                                                                                                                                                                                               |

|                                                                                                                                                                                                                                                    |
|----------------------------------------------------------------------------------------------------------------------------------------------------------------------------------------------------------------------------------------------------|
| Mean years since diagnosis (SD): NR (NR)                                                                                                                                                                                                           |
| Median years since diagnosis (range): NR (NR)                                                                                                                                                                                                      |
| Mean PSA ng/ml (SD): NR (NR)                                                                                                                                                                                                                       |
| Median PSA ng/ml (range): NR (NR)                                                                                                                                                                                                                  |
| AJCC, American Joint Committee on Cancer; ECOG, Eastern Cooperative Oncology Group; NR, not reported; PC, prostate cancer; PSA, prostate-specific antigen; SD, standard deviation; TNM, Tumor Nodes Metastasis classification of malignant tumors. |

|                                               |
|-----------------------------------------------|
| <b>Robbins <i>et al</i>, 2011 (21)</b>        |
| USA                                           |
| mPC. Diagnosis: Histology                     |
| Other details (NR)                            |
| Population (further details): unselected (NR) |
| Treatment (further details): NR (NR)          |
| Total (n=8)                                   |
| Mean age (SD): NR (NR)                        |
| Median age (range): NR (NR)                   |
| Ethnicity: NR                                 |
| Gleason score: NR                             |
| AJCC stage: NR                                |
| TNM stage: NR                                 |

|                                                                                                                                                                                                                                                                                                  |
|--------------------------------------------------------------------------------------------------------------------------------------------------------------------------------------------------------------------------------------------------------------------------------------------------|
| ECOG score                                                                                                                                                                                                                                                                                       |
| 0: NR                                                                                                                                                                                                                                                                                            |
| 1: NR                                                                                                                                                                                                                                                                                            |
| 0-1: NR                                                                                                                                                                                                                                                                                          |
| ≥2: NR                                                                                                                                                                                                                                                                                           |
| Previous treatments: NR                                                                                                                                                                                                                                                                          |
| Familial history of PC: NR                                                                                                                                                                                                                                                                       |
| Mean years since diagnosis (SD): NR (NR)                                                                                                                                                                                                                                                         |
| Median years since diagnosis (range): NR (NR)                                                                                                                                                                                                                                                    |
| Mean PSA ng/ml (SD): NR (NR)                                                                                                                                                                                                                                                                     |
| Median PSA ng/ml (range): NR (NR)                                                                                                                                                                                                                                                                |
| Comments: Extremely limited patient characteristics presented                                                                                                                                                                                                                                    |
| AJCC, American Joint Committee on Cancer; ECOG, Eastern Cooperative Oncology Group; m, metastatic; NR, not reported; PC, prostate cancer; PSA, prostate-specific antigen; SD, standard deviation; TNM, Tumor Nodes Metastasis classification of malignant tumors; USA, United States of America. |

|                                               |
|-----------------------------------------------|
| <b>Robinson <i>et al</i>, 2015 (89)</b>       |
| Multi-national                                |
| mCRPC. Diagnosis: Histology                   |
| Other details (NR)                            |
| Population (further details): unselected (NR) |
| Treatment (further details): NR (NR)          |
| Total (n=150)                                 |

|                                                                                                                                                                                                                                                                                                               |
|---------------------------------------------------------------------------------------------------------------------------------------------------------------------------------------------------------------------------------------------------------------------------------------------------------------|
| Mean age (SD): NR (NR)                                                                                                                                                                                                                                                                                        |
| Median age (range): 68 (43, 84)                                                                                                                                                                                                                                                                               |
| Ethnicity: NR                                                                                                                                                                                                                                                                                                 |
| Gleason score: NR                                                                                                                                                                                                                                                                                             |
| AJCC stage: NR                                                                                                                                                                                                                                                                                                |
| TNM stage: NR                                                                                                                                                                                                                                                                                                 |
| ECOG score                                                                                                                                                                                                                                                                                                    |
| 0: NR                                                                                                                                                                                                                                                                                                         |
| 1: NR                                                                                                                                                                                                                                                                                                         |
| 0-1: NR                                                                                                                                                                                                                                                                                                       |
| ≥2: NR                                                                                                                                                                                                                                                                                                        |
| Previous treatments: Abiraterone acetate or enzalutamide (48); taxane chemotherapy (41)                                                                                                                                                                                                                       |
| Familial history of PC: NR                                                                                                                                                                                                                                                                                    |
| Mean years since diagnosis (SD): NR (NR)                                                                                                                                                                                                                                                                      |
| Median years since diagnosis (range): NR (NR)                                                                                                                                                                                                                                                                 |
| Mean PSA ng/ml (SD): 55.78 ( )                                                                                                                                                                                                                                                                                |
| Median PSA ng/ml (range): NR (0.04, 4654.92)                                                                                                                                                                                                                                                                  |
| AJCC, American Joint Committee on Cancer; CRPC, castration-resistant prostate cancer; ECOG, Eastern Cooperative Oncology Group; m, metastatic; NR, not reported; PC, prostate cancer; PSA, prostate-specific antigen; SD, standard deviation; TNM, Tumor Nodes Metastasis classification of malignant tumors. |

|                                               |
|-----------------------------------------------|
| <b>Romero <i>et al</i>, 2017 (90)</b>         |
| Spain                                         |
| mCRPC. Diagnosis: Histology                   |
| Other details (NR)                            |
| Population (further details): unselected (NR) |
| Treatment (further details): NR (NR)          |
| Total (n=419)                                 |
| Mean age (SD): NR (NR)                        |
| Median age (range): 73 (43, 94)               |
| Ethnicity: NR                                 |
| Gleason score: NR                             |
| AJCC stage: NR                                |
| TNM stage: NR                                 |
| ECOG score                                    |
| 0: NR                                         |
| 1: NR                                         |
| 0-1: NR (91)                                  |
| ≥2: NR (9)                                    |
| Previous treatments: NR                       |
| Familial history of PC: NR                    |
| Mean years since diagnosis (SD): NR (NR)      |
| Median years since diagnosis (range): NR (NR) |

|                                                                                                                                                                                                                                                                                                               |
|---------------------------------------------------------------------------------------------------------------------------------------------------------------------------------------------------------------------------------------------------------------------------------------------------------------|
| Mean PSA ng/ml (SD): NR (NR)                                                                                                                                                                                                                                                                                  |
| Median PSA ng/ml (range): 26.95 (<0.02, 5198)                                                                                                                                                                                                                                                                 |
| Comments: Population data included for 'at diagnosis of mCRPC' rather than diagnosis of PC (more relevant to the study)                                                                                                                                                                                       |
| AJCC, American Joint Committee on Cancer; CRPC, castration-resistant prostate cancer; ECOG, Eastern Cooperative Oncology Group; m, metastatic; NR, not reported; PC, prostate cancer; PSA, prostate-specific antigen; SD, standard deviation; TNM, Tumor Nodes Metastasis classification of malignant tumors. |

|                                                                                                                     |                                         |
|---------------------------------------------------------------------------------------------------------------------|-----------------------------------------|
| <b>Sanchez <i>et al</i>, 2016 (91)</b>                                                                              |                                         |
| USA                                                                                                                 |                                         |
| Primary PC. Diagnosis: Initially through self-reporting that was confirmed by medical records and pathology reports |                                         |
| Other details (NR)                                                                                                  |                                         |
| Population (further details): treatment (Radiotherapy or radical prostatectomy)                                     |                                         |
| Treatment (further details): Radiotherapy (NR) Radical prostatectomy (NR)                                           |                                         |
| Radiotherapy (n=802)                                                                                                | Radical prostatectomy (n=1111)          |
| Mean age (SD): 72.1 (5.9)                                                                                           | Mean age (SD): 65.6 (6.1)               |
| Median age (range): NR (NR)                                                                                         | Median age (range): NR (NR)             |
| Ethnicity: European descent                                                                                         | Ethnicity: European descent             |
| Gleason score: ≤6 (64); 7 (25); ≥8 (11)                                                                             | Gleason score: ≤6 (43); 7 (45); ≥8 (11) |
| AJCC stage: NR                                                                                                      | AJCC stage: NR                          |
| TNM stage: T1/T2 (95); T3 (5)                                                                                       | TNM stage: T1/T2 (98); T3 (2)           |

|                                                                                                                                                                                                                                                                                                                      |                                                                                           |
|----------------------------------------------------------------------------------------------------------------------------------------------------------------------------------------------------------------------------------------------------------------------------------------------------------------------|-------------------------------------------------------------------------------------------|
| ECOG score<br>0: NR<br>1: NR<br>0-1: NR<br>≥2: NR                                                                                                                                                                                                                                                                    | ECOG score<br>0: NR<br>1: NR<br>0-1: NR<br>≥2: NR                                         |
| Previous treatments: Neoadjuvant/adjuvant ADT (33)                                                                                                                                                                                                                                                                   | Previous treatments: Neoadjuvant/adjuvant ADT (9)                                         |
| Familial history of PC: NR                                                                                                                                                                                                                                                                                           | Familial history of PC: NR                                                                |
| Mean years since diagnosis (SD): NR (NR)<br>Median years since diagnosis (range): NR (NR)                                                                                                                                                                                                                            | Mean years since diagnosis (SD): NR (NR)<br>Median years since diagnosis (range): NR (NR) |
| Mean PSA ng/ml (SD): NR (NR)<br>Median PSA ng/ml (range): NR (NR)                                                                                                                                                                                                                                                    | Mean PSA ng/ml (SD): NR (NR)<br>Median PSA ng/ml (range): NR (NR)                         |
| ADT, androgen deprivation therapy; AJCC, American Joint Committee on Cancer; ECOG, Eastern Cooperative Oncology Group; NR, not reported; PC, prostate cancer; PSA, prostate-specific antigen; SD, standard deviation; TNM, Tumor Nodes Metastasis classification of malignant tumors; USA, United States of America. |                                                                                           |

|                                                                                                                        |             |
|------------------------------------------------------------------------------------------------------------------------|-------------|
| <b>Sandhu <i>et al</i>, 2013 (92)</b>                                                                                  |             |
| UK and Multi-national                                                                                                  |             |
| mCRPC (UK) CRPC (Multi-national). Diagnosis: NR<br>Other details (NR)                                                  |             |
| Population (further details): unselected (NR)                                                                          |             |
| Treatment (further details): Mixed treatment (Olaparib 200 mg (50%); Olaparib 300 mg (25%); Niraparib (MK-4827) (25%)) |             |
| mCRPC (n=4)                                                                                                            | CRPC (n=23) |

|                                                                                                                                                                                                                                                                                                                                                              |                                                                                           |
|--------------------------------------------------------------------------------------------------------------------------------------------------------------------------------------------------------------------------------------------------------------------------------------------------------------------------------------------------------------|-------------------------------------------------------------------------------------------|
| Mean age (SD): 55.4 (6.4)<br>Median age (range): NR (54.6, 58)                                                                                                                                                                                                                                                                                               | Mean age (SD): NR (NR)<br>Median age (range): NR (NR)                                     |
| Ethnicity: NR                                                                                                                                                                                                                                                                                                                                                | Ethnicity: NR                                                                             |
| Gleason score: 6 (25); 7 (25); 8 (25); NR (25)                                                                                                                                                                                                                                                                                                               | Gleason score: NR                                                                         |
| AJCC stage: NR                                                                                                                                                                                                                                                                                                                                               | AJCC stage: NR                                                                            |
| TNM stage: T3N0M1 (50); T1cN1M0 (25); TxNXM1 (25)                                                                                                                                                                                                                                                                                                            | TNM stage: NR                                                                             |
| ECOG score<br>0: NR<br>1: NR<br>0-1: NR<br>≥2: NR                                                                                                                                                                                                                                                                                                            | ECOG score<br>0: NR<br>1: NR<br>0-1: NR<br>≥2: NR                                         |
| Previous treatments: Androgen blockade (bicalutamide) (100); carboplatin AUC6 (25); docetaxel (50); docetaxel + figitumumab (25); abiraterone (25); radical radiotherapy (25), radiotherapy to inguinal lymph nodes (25)                                                                                                                                     | Previous treatments: NR                                                                   |
| Familial history of PC: NR                                                                                                                                                                                                                                                                                                                                   | Familial history of PC: 0 (0)                                                             |
| Mean years since diagnosis (SD): NR (NR)<br>Median years since diagnosis (range): NR (NR)                                                                                                                                                                                                                                                                    | Mean years since diagnosis (SD): NR (NR)<br>Median years since diagnosis (range): NR (NR) |
| Mean PSA ng/ml (SD): NR (NR)<br>Median PSA ng/ml (range): NR (NR)                                                                                                                                                                                                                                                                                            | Mean PSA ng/ml (SD): NR (NR)<br>Median PSA ng/ml (range): NR (NR)                         |
| Comments: Sandhu 2013 <sup>(92)</sup>                                                                                                                                                                                                                                                                                                                        | Comments: ECOG scores were provided for the full cohort but not separated by sub-group    |
| AJCC, American Joint Committee on Cancer; AUC, area under the curve; CRPC, castration-resistant prostate cancer; ECOG, Eastern Cooperative Oncology Group; m, metastatic; NR, not reported; PC, prostate cancer; PSA, prostate-specific antigen; SD, standard deviation; TNM, Tumor Nodes Metastasis classification of malignant tumors; UK, United Kingdom. |                                                                                           |



|                                                                                           |
|-------------------------------------------------------------------------------------------|
| <b>Schweizer <i>et al</i>, 2016 (27)</b>                                                  |
| USA                                                                                       |
| Ductal PC. Diagnosis: NR<br>Other details (NR)                                            |
| Population (further details): unselected (NR)                                             |
| Treatment (further details): NR (NR)                                                      |
| Total (n=10)                                                                              |
| Mean age (SD): 59 (NR)<br>Median age (range): NR (40, 73)                                 |
| Ethnicity: NR                                                                             |
| Gleason score: 7 (20); 8 (20); 9 (60)                                                     |
| AJCC stage: NR                                                                            |
| TNM stage: NR                                                                             |
| ECOG score<br>0: NR<br>1: NR<br>0-1: NR<br>≥2: NR                                         |
| Previous treatments: NR                                                                   |
| Familial history of PC: NR                                                                |
| Mean years since diagnosis (SD): NR (NR)<br>Median years since diagnosis (range): NR (NR) |

|                                                                                                                                                                                                                                                                                   |
|-----------------------------------------------------------------------------------------------------------------------------------------------------------------------------------------------------------------------------------------------------------------------------------|
| Mean PSA ng/ml (SD): NR (NR)                                                                                                                                                                                                                                                      |
| Median PSA ng/ml (range): NR (NR)                                                                                                                                                                                                                                                 |
| AJCC, American Joint Committee on Cancer; ECOG, Eastern Cooperative Oncology Group; NR, not reported; PC, prostate cancer; PSA, prostate-specific antigen; SD, standard deviation; TNM, Tumor Nodes Metastasis classification of malignant tumors; USA, United States of America. |

|                                                                                                                                                                                                                                             |
|---------------------------------------------------------------------------------------------------------------------------------------------------------------------------------------------------------------------------------------------|
| <b>Shapiro <i>et al</i>, 2017 (93)</b>                                                                                                                                                                                                      |
| Multi-national                                                                                                                                                                                                                              |
| mCRPC. Diagnosis: Histologically or cytologically confirmed adenocarcinoma or poorly differentiated carcinoma of the prostate; and has undergone surgical or medical castration with serum testosterone levels of $\leq 50$ ng/dL (1.73 nM) |
| Other details (NR)                                                                                                                                                                                                                          |
| Population (further details): unselected (NR)                                                                                                                                                                                               |
| Treatment (further details): Rucaparib (600 mg oral rucaparib administered twice daily)                                                                                                                                                     |
| DDR+ (n=NR)                                                                                                                                                                                                                                 |
| Mean age (SD): NR (NR)                                                                                                                                                                                                                      |
| Median age (range): NR (NR)                                                                                                                                                                                                                 |
| Ethnicity: NR                                                                                                                                                                                                                               |
| Gleason score: NR                                                                                                                                                                                                                           |
| AJCC stage: NR                                                                                                                                                                                                                              |
| TNM stage: NR                                                                                                                                                                                                                               |

|                                                                                                                                                                                                                                                                                                                                       |
|---------------------------------------------------------------------------------------------------------------------------------------------------------------------------------------------------------------------------------------------------------------------------------------------------------------------------------------|
| ECOG score<br>0: NR<br>1: NR<br>0-1: NR<br>≥2: NR                                                                                                                                                                                                                                                                                     |
| Previous treatments: NR                                                                                                                                                                                                                                                                                                               |
| Familial history of PC: NR                                                                                                                                                                                                                                                                                                            |
| Mean years since diagnosis (SD): NR (NR)<br>Median years since diagnosis (range): NR (NR)                                                                                                                                                                                                                                             |
| Mean PSA ng/ml (SD): NR (NR)<br>Median PSA ng/ml (range): NR (NR)                                                                                                                                                                                                                                                                     |
| Comments: Ongoing trial with no reported details.                                                                                                                                                                                                                                                                                     |
| AJCC, American Joint Committee on Cancer; CRPC, castration-resistant prostate cancer; DDR, DNA damage repair; ECOG, Eastern Cooperative Oncology Group; m, metastatic; NR, not reported; PC, prostate cancer; PSA, prostate-specific antigen; SD, standard deviation; TNM, Tumor Nodes Metastasis classification of malignant tumors. |

|                                                        |
|--------------------------------------------------------|
| <b>Sofronescu <i>et al</i>, 2012 (94)</b>              |
| USA                                                    |
| PC. Diagnosis: NR<br>Other details (NR)                |
| Population (further details): treatment (radiotherapy) |
| Treatment (further details): radiotherapy (NR)         |
| Total (n=87)                                           |

|                                                                                                                                                                                                                                                                        |
|------------------------------------------------------------------------------------------------------------------------------------------------------------------------------------------------------------------------------------------------------------------------|
| Mean age (SD): NR (NR)<br>Median age (range): NR (NR)                                                                                                                                                                                                                  |
| Ethnicity: NR                                                                                                                                                                                                                                                          |
| Gleason score: NR                                                                                                                                                                                                                                                      |
| AJCC stage: NR                                                                                                                                                                                                                                                         |
| TNM stage: NR                                                                                                                                                                                                                                                          |
| ECOG score<br>0: NR<br>1: NR<br>0-1: NR<br>≥2: NR                                                                                                                                                                                                                      |
| Previous treatments: NR                                                                                                                                                                                                                                                |
| Familial history of PC: NR                                                                                                                                                                                                                                             |
| Mean years since diagnosis (SD): NR (NR)<br>Median years since diagnosis (range): NR (NR)                                                                                                                                                                              |
| Mean PSA ng/ml (SD): NR (NR)<br>Median PSA ng/ml (range): NR (NR)                                                                                                                                                                                                      |
| AJCC, American Joint Committee on Cancer; ECOG, Eastern Cooperative Oncology Group; NR, not reported; PC, prostate cancer; PSA, prostate-specific antigen; SD, standard deviation; TNM, Tumor Nodes Metastasis classification of malignant tumors; UK, United Kingdom. |

|                                                                                           |
|-------------------------------------------------------------------------------------------|
| <b>Sonpavde <i>et al</i>, 2017 (6)</b>                                                    |
| NR                                                                                        |
| mCRPC. Diagnosis: NR<br>Other details (NR)                                                |
| Population (further details): unselected (NR)                                             |
| Treatment (further details): NR (NR)                                                      |
| Total (n=514)                                                                             |
| Mean age (SD): NR (NR)<br>Median age (range): 70 (39, 91)                                 |
| Ethnicity: NR                                                                             |
| Gleason score: NR                                                                         |
| AJCC stage: NR                                                                            |
| TNM stage: NR                                                                             |
| ECOG score<br>0: NR<br>1: NR<br>0-1: NR<br>≥2: NR                                         |
| Previous treatments: NR                                                                   |
| Familial history of PC: NR                                                                |
| Mean years since diagnosis (SD): NR (NR)<br>Median years since diagnosis (range): NR (NR) |

|                                                                                                                                                                                                                                                                                                               |
|---------------------------------------------------------------------------------------------------------------------------------------------------------------------------------------------------------------------------------------------------------------------------------------------------------------|
| Mean PSA ng/ml (SD): NR (NR)                                                                                                                                                                                                                                                                                  |
| Median PSA ng/ml (range): NR (NR)                                                                                                                                                                                                                                                                             |
| AJCC, American Joint Committee on Cancer; CRPC, castration-resistant prostate cancer; ECOG, Eastern Cooperative Oncology Group; m, metastatic; NR, not reported; PC, prostate cancer; PSA, prostate-specific antigen; SD, standard deviation; TNM, Tumor Nodes Metastasis classification of malignant tumors. |

|                                                                                     |
|-------------------------------------------------------------------------------------|
| <b>Stephens <i>et al</i>, 2016 (29)</b>                                             |
| NR                                                                                  |
| Other. Diagnosis: Histology                                                         |
| Other details (Relapsed/metastatic neuroendocrine carcinoma of the prostate (NCAP)) |
| Population (further details): unselected (NR)                                       |
| Treatment (further details): NR (NR)                                                |
| Total (n=37)                                                                        |
| Mean age (SD): 65.1 (NR)                                                            |
| Median age (range): NR (43, 83)                                                     |
| Ethnicity: NR                                                                       |
| Gleason score: NR                                                                   |
| AJCC stage: IV (100)                                                                |
| TNM stage: NR                                                                       |

|                                                                                                                                                                                                                                                    |
|----------------------------------------------------------------------------------------------------------------------------------------------------------------------------------------------------------------------------------------------------|
| ECOG score<br>0: NR<br>1: NR<br>0-1: NR<br>≥2: NR                                                                                                                                                                                                  |
| Previous treatments: NR                                                                                                                                                                                                                            |
| Familial history of PC: NR                                                                                                                                                                                                                         |
| Mean years since diagnosis (SD): NR (NR)<br>Median years since diagnosis (range): NR (NR)                                                                                                                                                          |
| Mean PSA ng/ml (SD): NR (NR)<br>Median PSA ng/ml (range): NR (NR)                                                                                                                                                                                  |
| AJCC, American Joint Committee on Cancer; ECOG, Eastern Cooperative Oncology Group; NR, not reported; PC, prostate cancer; PSA, prostate-specific antigen; SD, standard deviation; TNM, Tumor Nodes Metastasis classification of malignant tumors. |

|                                                                              |
|------------------------------------------------------------------------------|
| <b>Struss <i>et al</i>, 2017 (95)</b>                                        |
| Canada                                                                       |
| mCRPC. Diagnosis: NR<br>Other details (NR)                                   |
| Population (further details): unselected (NR)                                |
| Treatment (further details): chemotherapy; androgen deprivation therapy (NR) |
| Total (n=319)                                                                |
| Mean age (SD): NR (NR)<br>Median age (range): NR (NR)                        |

|                                                                                                                                                                                                                                                                                                               |
|---------------------------------------------------------------------------------------------------------------------------------------------------------------------------------------------------------------------------------------------------------------------------------------------------------------|
| Ethnicity: NR                                                                                                                                                                                                                                                                                                 |
| Gleason score: NR                                                                                                                                                                                                                                                                                             |
| AJCC stage: NR                                                                                                                                                                                                                                                                                                |
| TNM stage: NR                                                                                                                                                                                                                                                                                                 |
| ECOG score<br>0: NR<br>1: NR<br>0-1: NR<br>≥2: NR                                                                                                                                                                                                                                                             |
| Previous treatments: NR                                                                                                                                                                                                                                                                                       |
| Familial history of PC: NR                                                                                                                                                                                                                                                                                    |
| Mean years since diagnosis (SD): NR (NR)<br>Median years since diagnosis (range): NR (NR)                                                                                                                                                                                                                     |
| Mean PSA ng/ml (SD): NR (NR)<br>Median PSA ng/ml (range): NR (NR)                                                                                                                                                                                                                                             |
| AJCC, American Joint Committee on Cancer; CRPC, castration-resistant prostate cancer; ECOG, Eastern Cooperative Oncology Group; m, metastatic; NR, not reported; PC, prostate cancer; PSA, prostate-specific antigen; SD, standard deviation; TNM, Tumor Nodes Metastasis classification of malignant tumors. |

|                                                                |
|----------------------------------------------------------------|
| <b>Tanaka <i>et al</i>, 2009 (7)</b>                           |
| Japan                                                          |
| PC. Diagnosis: Pathology (TNM and Grade)<br>Other details (NR) |



|                                                                                           |
|-------------------------------------------------------------------------------------------|
| Population (further details): unselected (NR)                                             |
| Treatment (further details): NR (NR)                                                      |
| Total (n=177)                                                                             |
| Mean age (SD): 68.6 (0.4)<br>Median age (range): NR (NR)                                  |
| Ethnicity: NR                                                                             |
| Gleason score: NR                                                                         |
| AJCC stage: NR                                                                            |
| TNM stage: NR                                                                             |
| ECOG score<br>0: NR<br>1: NR<br>0-1: NR<br>≥2: NR                                         |
| Previous treatments: NR                                                                   |
| Familial history of PC: NR                                                                |
| Mean years since diagnosis (SD): NR (NR)<br>Median years since diagnosis (range): NR (NR) |
| Mean PSA ng/ml (SD): 11.6 (0.8)<br>Median PSA ng/ml (range): NR (NR)                      |
| Comments: Age and PSA levels in BPH patients also available                               |

AJCC, American Joint Committee on Cancer; BPH, benign prostatic hyperplasia; ECOG, Eastern Cooperative Oncology Group; NR, not reported; PC, prostate cancer; PSA, prostate-specific antigen; SD, standard deviation; TNM, Tumor Nodes Metastasis classification of malignant tumors.

|                                                                                                                 |                                                  |
|-----------------------------------------------------------------------------------------------------------------|--------------------------------------------------|
| <b>Timms <i>et al</i>, 2016 (96)</b>                                                                            |                                                  |
| NR                                                                                                              |                                                  |
| PC. Diagnosis: Histology<br>Other details (NR)                                                                  |                                                  |
| Population (further details): unselected (commercial biobank), unselected (Transatlantic Prostate Group Cohort) |                                                  |
| Treatment (further details): NR (NR)                                                                            |                                                  |
| Biobank (n=39)                                                                                                  | Transatlantic Prostate Group Cohort (n=45)       |
| Mean age (SD): NR (NR)                                                                                          | Mean age (SD): NR (NR)                           |
| Median age (range): NR (NR)                                                                                     | Median age (range): NR (NR)                      |
| Ethnicity: NR                                                                                                   | Ethnicity: NR                                    |
| Gleason score: <7 (21); 3+4 (64); 4+3 (15); >7 (0)                                                              | Gleason score: <7 (2); 3+4 and 4+3 (82); >7 (18) |
| AJCC stage: NR                                                                                                  | AJCC stage: NR                                   |
| TNM stage: NR                                                                                                   | TNM stage: NR                                    |
| ECOG score                                                                                                      | ECOG score                                       |
| 0: NR                                                                                                           | 0: NR                                            |
| 1: NR                                                                                                           | 1: NR                                            |
| 0-1: NR                                                                                                         | 0-1: NR                                          |
| ≥2: NR                                                                                                          | ≥2: NR                                           |
| Previous treatments: NR                                                                                         | Previous treatments: NR                          |

|                                                                                                                                                                                                                                                    |                                               |
|----------------------------------------------------------------------------------------------------------------------------------------------------------------------------------------------------------------------------------------------------|-----------------------------------------------|
| Familial history of PC: NR                                                                                                                                                                                                                         | Familial history of PC: NR                    |
| Mean years since diagnosis (SD): NR (NR)                                                                                                                                                                                                           | Mean years since diagnosis (SD): NR (NR)      |
| Median years since diagnosis (range): NR (NR)                                                                                                                                                                                                      | Median years since diagnosis (range): NR (NR) |
| Mean PSA ng/ml (SD): NR (NR)                                                                                                                                                                                                                       | Mean PSA ng/ml (SD): NR (NR)                  |
| Median PSA ng/ml (range): NR (NR)                                                                                                                                                                                                                  | Median PSA ng/ml (range): NR (NR)             |
| AJCC, American Joint Committee on Cancer; ECOG, Eastern Cooperative Oncology Group; NR, not reported; PC, prostate cancer; PSA, prostate-specific antigen; SD, standard deviation; TNM, Tumor Nodes Metastasis classification of malignant tumors. |                                               |

|                                                                                                                        |                                        |
|------------------------------------------------------------------------------------------------------------------------|----------------------------------------|
| <b>Tischkowitz <i>et al</i>, 2008 (97)</b>                                                                             |                                        |
| Canada                                                                                                                 |                                        |
| PC. Diagnosis: NR                                                                                                      |                                        |
| Other details (NR)                                                                                                     |                                        |
| Population (further details): Ashkenazi (chosen based on the presence of a family history and/or a high Gleason score) |                                        |
| Treatment (further details): NR (NR)                                                                                   |                                        |
| family history and/or a high Gleason score (n=25)                                                                      | Total (n=125)                          |
| Mean age (SD): NR (NR)                                                                                                 | Mean age (SD): NR (NR)                 |
| Median age (range): NR (NR)                                                                                            | Median age (range): NR (NR)            |
| Ethnicity: NR                                                                                                          | Ethnicity: NR                          |
| Gleason score: mean Gleason score: 7.4                                                                                 | Gleason score: mean Gleason score: 5.6 |
| AJCC stage: NR                                                                                                         | AJCC stage: NR                         |
| TNM stage: NR                                                                                                          | TNM stage: NR                          |

|                                                                                                                                                                                                                                                    |                                                                                           |
|----------------------------------------------------------------------------------------------------------------------------------------------------------------------------------------------------------------------------------------------------|-------------------------------------------------------------------------------------------|
| ECOG score<br>0: NR<br>1: NR<br>0-1: NR<br>≥2: NR                                                                                                                                                                                                  | ECOG score<br>0: NR<br>1: NR<br>0-1: NR<br>≥2: NR                                         |
| Previous treatments: NR                                                                                                                                                                                                                            | Previous treatments: NR                                                                   |
| Familial history of PC: NR                                                                                                                                                                                                                         | Familial history of PC: NR                                                                |
| Mean years since diagnosis (SD): NR (NR)<br>Median years since diagnosis (range): NR (NR)                                                                                                                                                          | Mean years since diagnosis (SD): NR (NR)<br>Median years since diagnosis (range): NR (NR) |
| Mean PSA ng/ml (SD): NR (NR)<br>Median PSA ng/ml (range): NR (NR)                                                                                                                                                                                  | Mean PSA ng/ml (SD): NR (NR)<br>Median PSA ng/ml (range): NR (NR)                         |
| Comments: mean age at diagnosis: 67.5 years                                                                                                                                                                                                        | Comments: mean age at diagnosis: 68.2 years                                               |
| AJCC, American Joint Committee on Cancer; ECOG, Eastern Cooperative Oncology Group; NR, not reported; PC, prostate cancer; PSA, prostate-specific antigen; SD, standard deviation; TNM, Tumor Nodes Metastasis classification of malignant tumors. |                                                                                           |

|                                                                          |
|--------------------------------------------------------------------------|
| <b>Uchida <i>et al</i>, 1999 (12)</b>                                    |
| Japan                                                                    |
| Primary PC. Diagnosis: Pathology (Stage and Grade)<br>Other details (NR) |
| Population (further details): unselected (NR)                            |
| Treatment (further details): NR (NR)                                     |
| Total (n=24)                                                             |

|                                                                                                                                                                                                                                                    |
|----------------------------------------------------------------------------------------------------------------------------------------------------------------------------------------------------------------------------------------------------|
| Mean age (SD): NR (NR)                                                                                                                                                                                                                             |
| Median age (range): NR (NR)                                                                                                                                                                                                                        |
| Ethnicity: NR                                                                                                                                                                                                                                      |
| Gleason score: NR                                                                                                                                                                                                                                  |
| AJCC stage: NR                                                                                                                                                                                                                                     |
| TNM stage: NR                                                                                                                                                                                                                                      |
| ECOG score<br>0: NR<br>1: NR<br>0-1: NR<br>≥2: NR                                                                                                                                                                                                  |
| Previous treatments: NR                                                                                                                                                                                                                            |
| Familial history of PC: NR                                                                                                                                                                                                                         |
| Mean years since diagnosis (SD): NR (NR)                                                                                                                                                                                                           |
| Median years since diagnosis (range): NR (NR)                                                                                                                                                                                                      |
| Mean PSA ng/ml (SD): NR (NR)                                                                                                                                                                                                                       |
| Median PSA ng/ml (range): NR (NR)                                                                                                                                                                                                                  |
| Comments: Staged as A2 in 1 patient, B in 3, C in 5, and D in 15 patients. 4 patients had well-differentiated, 9 had moderately differentiated, and 11 had poorly differentiated tumors.                                                           |
| AJCC, American Joint Committee on Cancer; ECOG, Eastern Cooperative Oncology Group; NR, not reported; PC, prostate cancer; PSA, prostate-specific antigen; SD, standard deviation; TNM, Tumor Nodes Metastasis classification of malignant tumors. |

|                                                                                                                                 |
|---------------------------------------------------------------------------------------------------------------------------------|
| <b>Vazina <i>et al</i>, 2000 (98)</b>                                                                                           |
| Israel                                                                                                                          |
| PC. Diagnosis: Clinical and histopathological diagnosis<br>Other details (NR)                                                   |
| Population (further details): Unselected or Ashkenazi (Unselected prostate cancer patients (95 out of 174 of Ashkenazi origin)) |
| Treatment (further details): NR (NR)                                                                                            |
| Total (n=174)                                                                                                                   |
| Mean age (SD): NR (NR)<br>Median age (range): 66 (45, 81)                                                                       |
| Ethnicity: Ashkenazi (54.6); non-Ashkenazis (45.4)                                                                              |
| Gleason score: 5-7 (48.3); 8-10 (6.9)                                                                                           |
| AJCC stage: NR                                                                                                                  |
| TNM stage: T2 (60%); T3 (26.4%)                                                                                                 |
| ECOG score<br>0: NR<br>1: NR<br>0-1: NR<br>≥2: NR                                                                               |
| Previous treatments: NR                                                                                                         |
| Familial history of PC: 19 (10.9)                                                                                               |
| Mean years since diagnosis (SD): NR (NR)<br>Median years since diagnosis (range): NR (NR)                                       |

|                                                                                                                                                                                                                                                    |
|----------------------------------------------------------------------------------------------------------------------------------------------------------------------------------------------------------------------------------------------------|
| Mean PSA ng/ml (SD): NR (NR)                                                                                                                                                                                                                       |
| Median PSA ng/ml (range): NR (NR)                                                                                                                                                                                                                  |
| AJCC, American Joint Committee on Cancer; ECOG, Eastern Cooperative Oncology Group; NR, not reported; PC, prostate cancer; PSA, prostate-specific antigen; SD, standard deviation; TNM, Tumor Nodes Metastasis classification of malignant tumors. |

|                                                         |
|---------------------------------------------------------|
| <b>Williams <i>et al</i>, 1996 (99)</b>                 |
| USA                                                     |
| Primary PC. Diagnosis: NR                               |
| Other details (stage B)                                 |
| Population (further details): unselected (NR)           |
| Treatment (further details): radical prostatectomy (NR) |
| Total (n=23)                                            |
| Mean age (SD): NR (NR)                                  |
| Median age (range): NR (NR)                             |
| Ethnicity: NR                                           |
| Gleason score: NR                                       |
| AJCC stage: NR                                          |
| TNM stage: NR                                           |
| ECOG score                                              |
| 0: NR                                                   |
| 1: NR                                                   |
| 0-1: NR                                                 |
| ≥2: NR                                                  |

|                                                                                                                                                                                                                                                                                    |
|------------------------------------------------------------------------------------------------------------------------------------------------------------------------------------------------------------------------------------------------------------------------------------|
| Previous treatments: radical prostatectomy (100)                                                                                                                                                                                                                                   |
| Familial history of PC: NR                                                                                                                                                                                                                                                         |
| Mean years since diagnosis (SD): NR (NR)                                                                                                                                                                                                                                           |
| Median years since diagnosis (range): NR (NR)                                                                                                                                                                                                                                      |
| Mean PSA ng/ml (SD): NR (NR)                                                                                                                                                                                                                                                       |
| Median PSA ng/ml (range): NR (NR)                                                                                                                                                                                                                                                  |
| Comments: Very limited patient characteristics presented                                                                                                                                                                                                                           |
| AJCC, American Joint Committee on Cancer; ECOG, Eastern Cooperative Oncology Group; NR, not reported; PC, prostate cancer; PSA, prostate-specific antigen; SD, standard deviation; TNM, Tumor Nodes Metastasis classification of malignant tumors ; USA, United States of America. |

|                                               |
|-----------------------------------------------|
| <b>Wu <i>et al</i>, 2006 (100)</b>            |
| USA                                           |
| Primary PC. Diagnosis: NR                     |
| Other details (NR)                            |
| Population (further details): unselected (NR) |
| Treatment (further details): NR (NR)          |
| Total (n=84)                                  |
| Mean age (SD): NR (NR)                        |
| Median age (range): NR (48, 75)               |
| Ethnicity: NR                                 |
| Gleason score: NR                             |
| AJCC stage: NR                                |



|                                                                                                                                                                                                                                                                                    |
|------------------------------------------------------------------------------------------------------------------------------------------------------------------------------------------------------------------------------------------------------------------------------------|
| TNM stage: NR                                                                                                                                                                                                                                                                      |
| ECOG score<br>0: NR<br>1: NR<br>0-1: NR<br>≥2: NR                                                                                                                                                                                                                                  |
| Previous treatments: NR                                                                                                                                                                                                                                                            |
| Familial history of PC: NR                                                                                                                                                                                                                                                         |
| Mean years since diagnosis (SD): NR (NR)<br>Median years since diagnosis (range): NR (NR)                                                                                                                                                                                          |
| Mean PSA ng/ml (SD): NR (NR)<br>Median PSA ng/ml (range): NR (NR)                                                                                                                                                                                                                  |
| Comments: Very limited baseline characteristics presented                                                                                                                                                                                                                          |
| AJCC, American Joint Committee on Cancer; ECOG, Eastern Cooperative Oncology Group; NR, not reported; PC, prostate cancer; PSA, prostate-specific antigen; SD, standard deviation; TNM, Tumor Nodes Metastasis classification of malignant tumors ; USA, United States of America. |

|                                               |
|-----------------------------------------------|
| <b>Xia <i>et al</i>, 2015 (18)</b>            |
| USA                                           |
| PC. Diagnosis: NR<br>Other details (NR)       |
| Population (further details): unselected (NR) |
| Treatment (further details): NR (NR)          |

|                                                                                                                                                                                                                                                                                    |
|------------------------------------------------------------------------------------------------------------------------------------------------------------------------------------------------------------------------------------------------------------------------------------|
| Total (n=20)                                                                                                                                                                                                                                                                       |
| Mean age (SD): 65.5 (NR)<br>Median age (range): NR (49, 81)                                                                                                                                                                                                                        |
| Ethnicity: NR                                                                                                                                                                                                                                                                      |
| Gleason score: 5 (5); 6 (5); 7 (35); 8 (10); 9 (45)                                                                                                                                                                                                                                |
| AJCC stage: NR                                                                                                                                                                                                                                                                     |
| TNM stage: T1 (0); T2 (451); T3 (45); T4 (5); TX (5); N0 (20); N1 (35); N2(5); Nx(40); M0(65); M1 (35).                                                                                                                                                                            |
| ECOG score<br>0: NR<br>1: NR<br>0-1: NR<br>≥2: NR                                                                                                                                                                                                                                  |
| Previous treatments: NR                                                                                                                                                                                                                                                            |
| Familial history of PC: NR                                                                                                                                                                                                                                                         |
| Mean years since diagnosis (SD): NR (NR)<br>Median years since diagnosis (range): NR (NR)                                                                                                                                                                                          |
| Mean PSA ng/ml (SD): 18.9 (NR)<br>Median PSA ng/ml (range): NR (0.33, 126)                                                                                                                                                                                                         |
| Comments: PSA levels reported at the time of the first sample collection                                                                                                                                                                                                           |
| AJCC, American Joint Committee on Cancer; ECOG, Eastern Cooperative Oncology Group; NR, not reported; PC, prostate cancer; PSA, prostate-specific antigen; SD, standard deviation; TNM, Tumor Nodes Metastasis classification of malignant tumors ; USA, United States of America. |

|                                                                                           |
|-------------------------------------------------------------------------------------------|
| <b>Zhu <i>et al</i>, 2010 (101)</b>                                                       |
| USA                                                                                       |
| PC. Diagnosis: NR<br>Other details (NR)                                                   |
| Population (further details): treatment (External beam radiotherapy)                      |
| Treatment (further details): External beam radiotherapy (NR)                              |
| Total (n=31)                                                                              |
| Mean age (SD): NR (NR)<br>Median age (range): NR (NR)                                     |
| Ethnicity: NR                                                                             |
| Gleason score: NR                                                                         |
| AJCC stage: NR                                                                            |
| TNM stage: NR                                                                             |
| ECOG score<br>0: NR<br>1: NR<br>0-1: NR<br>≥2: NR                                         |
| Previous treatments: NR                                                                   |
| Familial history of PC: NR                                                                |
| Mean years since diagnosis (SD): NR (NR)<br>Median years since diagnosis (range): NR (NR) |

|                                                                                                                                                                                                                                                                                    |
|------------------------------------------------------------------------------------------------------------------------------------------------------------------------------------------------------------------------------------------------------------------------------------|
| Mean PSA ng/ml (SD): NR (NR)                                                                                                                                                                                                                                                       |
| Median PSA ng/ml (range): NR (NR)                                                                                                                                                                                                                                                  |
| AJCC, American Joint Committee on Cancer; ECOG, Eastern Cooperative Oncology Group; NR, not reported; PC, prostate cancer; PSA, prostate-specific antigen; SD, standard deviation; TNM, Tumor Nodes Metastasis classification of malignant tumors ; USA, United States of America. |

|                                                                                                                           |
|---------------------------------------------------------------------------------------------------------------------------|
| <b>Zuhlke <i>et al</i>, 2012 (102)</b>                                                                                    |
| USA                                                                                                                       |
| PC. Diagnosis: medical record review whenever possible                                                                    |
| Other details (NR)                                                                                                        |
| Population (further details): familial (hereditary prostate cancer)                                                       |
| Treatment (further details): NR (NR)                                                                                      |
| Total (n=94)                                                                                                              |
| Mean age (SD): NR (NR)                                                                                                    |
| Median age (range): NR (NR)                                                                                               |
| Ethnicity: Seven families were of African descent, 2 were of Asian descent, and the remaining 85 were of European descent |
| Gleason score: NR                                                                                                         |
| AJCC stage: NR                                                                                                            |
| TNM stage: NR                                                                                                             |

|                                                                                                                                                                                                                                                                                           |
|-------------------------------------------------------------------------------------------------------------------------------------------------------------------------------------------------------------------------------------------------------------------------------------------|
| <p>ECOG score</p> <p>0: NR</p> <p>1: NR</p> <p>0-1: NR</p> <p>≥2: NR</p>                                                                                                                                                                                                                  |
| <p>Previous treatments: radical prostatectomy</p>                                                                                                                                                                                                                                         |
| <p>Familial history of PC: NR</p>                                                                                                                                                                                                                                                         |
| <p>Mean years since diagnosis (SD): NR (NR)</p> <p>Median years since diagnosis (range): NR (NR)</p>                                                                                                                                                                                      |
| <p>Mean PSA ng/ml (SD): NR (NR)</p> <p>Median PSA ng/ml (range): NR (NR)</p>                                                                                                                                                                                                              |
| <p>AJCC, American Joint Committee on Cancer; ECOG, Eastern Cooperative Oncology Group; NR, not reported; PC, prostate cancer; PSA, prostate-specific antigen; SD, standard deviation; TNM, Tumor Nodes Metastasis classification of malignant tumors ; USA, United States of America.</p> |

**Appendix S6. Methods for DDR gene mutational analysis.**

| Germline or somatic mutation | Source of DNA | Methods | Details of methods                                                                                                                                                                                     | DDR definition                                                                                                                                                                                                                                                                                                                                                        | Author, year                                                              | References                |      |
|------------------------------|---------------|---------|--------------------------------------------------------------------------------------------------------------------------------------------------------------------------------------------------------|-----------------------------------------------------------------------------------------------------------------------------------------------------------------------------------------------------------------------------------------------------------------------------------------------------------------------------------------------------------------------|---------------------------------------------------------------------------|---------------------------|------|
| <i>Australia</i>             |               |         |                                                                                                                                                                                                        |                                                                                                                                                                                                                                                                                                                                                                       |                                                                           |                           |      |
| NR/<br>unclear               | NR            | NR      | NR                                                                                                                                                                                                     | <i>BRCA1</i> and <i>BRCA2</i><br>(undefined)                                                                                                                                                                                                                                                                                                                          | Cheng <i>et al</i> ,<br>2011                                              | (23)                      |      |
| <i>Canada</i>                |               |         |                                                                                                                                                                                                        |                                                                                                                                                                                                                                                                                                                                                                       |                                                                           |                           |      |
| Germline                     | Blood sample  | other   | Sequencing using an ABI 3730XL DNA Sequencer. Sequences were analysed using Chromas 2.3. Long-range PCR to confirm all variants were located within functional copy of <i>CHEK2</i> (chromosome 22q12) | <i>CHEK2</i> variants (exon 11 1270T>CY424H; exon 11 1283C>T S428F; exon 11 1312G>T D438Y; exon 13 1525C>T P509S)                                                                                                                                                                                                                                                     | Tischkowitz <i>et al</i> , 2008                                           | (97)                      |      |
|                              |               | PCR     | PCR and pyrosequencing                                                                                                                                                                                 | <i>ATM</i> ; <i>BCL2</i> ; <i>BRCA1</i> ; <i>BRCA2</i> ; <i>CYP1A1</i> ; <i>CYP2C9</i> ; <i>CYP2C19</i> ; <i>CYP3A5</i> ; <i>CYP2D6</i> ; <i>CYP11B2</i> ; <i>CYP17A1</i> ; <i>ERCC2</i> ; <i>ESR1</i> ; <i>LIG4</i> ; <i>MSH6</i> ; <i>NBN</i> ; <i>NR3C1</i> ; <i>RAD51</i> ; <i>RAD52</i> ; <i>TGFB1</i> ; <i>XPF</i> ; <i>XRCC1</i> , <i>XRCC2</i> , <i>XRCC3</i> | Damaraju <i>et al</i> , 2006                                              | (26)                      |      |
|                              |               |         |                                                                                                                                                                                                        | Multiplex sizing assay. Samples demonstrating a band shift were run again for confirmation                                                                                                                                                                                                                                                                            | <i>BRCA1</i> (185delAG); <i>BRCA1</i> (5382insC); <i>BRCA2</i> (6174delT) | Hamel <i>et al</i> , 2003 | (55) |
|                              |               |         |                                                                                                                                                                                                        | RFLP                                                                                                                                                                                                                                                                                                                                                                  | <i>CHK2</i> (1100delC)                                                    | Nam <i>et al</i> , 2005   | (15) |

|                |              |                   |                                                                                                                                                                                                                                    |                                                                                    |                                  |       |
|----------------|--------------|-------------------|------------------------------------------------------------------------------------------------------------------------------------------------------------------------------------------------------------------------------------|------------------------------------------------------------------------------------|----------------------------------|-------|
|                |              | Sanger sequencing | Sanger sequencing method for all 26 coding exons of <i>BRCA2</i> (NM_000059.3)                                                                                                                                                     | Undefined <i>BRCA2</i> mutations                                                   | Akbari <i>et al</i> , 2014       | (103) |
|                | plasma ctDNA | PCR               | Targeted germline sequencing                                                                                                                                                                                                       | 22 undefined DDR genes (including <i>BRCA2</i> , <i>PALB2</i> , and <i>CDK12</i> ) | Struss <i>et al</i> , 2017       | (95)  |
| <i>Denmark</i> |              |                   |                                                                                                                                                                                                                                    |                                                                                    |                                  |       |
| Germline       | Blood sample | PCR               | Presence of <i>CHEK2</i> *1100delC was determined by Taqman PCR and sequencing                                                                                                                                                     | <i>CHEK2</i> *1100delC                                                             | Naslund Koch <i>et al</i> , 2016 | (16)  |
| <i>Germany</i> |              |                   |                                                                                                                                                                                                                                    |                                                                                    |                                  |       |
| Germline       | Blood sample | PCR               | Allele frequencies assessed using RFLP analysis with AlwI after PCR amplification of a genomic DNA fragment spanning the exons 23 and 24                                                                                           | <i>ATM</i> missense variant P1054R                                                 | Meyer <i>et al</i> , 2007        | (25)  |
|                |              | Sanger sequencing | 25 target regions spanning all 26 coding exons of the <i>BRCA2</i> gene were amplified by PCR and sequenced by Sanger sequencing. Sequence variants with no codon change and alleles with observed frequencies of >2% were omitted | <i>BRCA2</i> exon sequence variants                                                | Maier <i>et al</i> , 2014        | (72)  |
| Somatic        | Tumor biopsy | PCR               | Limited details. Ion Torrent AmpliSeq™ technology                                                                                                                                                                                  | <i>BRCA1</i> or <i>BRCA2</i>                                                       | Nientiedt <i>et al</i> , 2017    | (82)  |
| <i>Israel</i>  |              |                   |                                                                                                                                                                                                                                    |                                                                                    |                                  |       |
| Germline       | Blood sample | NR/unclear        | NR                                                                                                                                                                                                                                 | <i>BRCA1</i> (185delAG, 5382insC); <i>BRCA2</i> (6174delT)                         | Hubert <i>et al</i> , 1999       | (59)  |

|         |                                                      |     |                                                                                                                                                                                                                                                                                                                                                                                 |                                                                                    |                            |             |
|---------|------------------------------------------------------|-----|---------------------------------------------------------------------------------------------------------------------------------------------------------------------------------------------------------------------------------------------------------------------------------------------------------------------------------------------------------------------------------|------------------------------------------------------------------------------------|----------------------------|-------------|
|         | Peripheral blood and matched paraffin embedded tumor | PCR | PCR with chr17 markers (D17S250, D17S579 (both localise centromeric to the <i>BRCA1</i> locus), D17S855, D17S1322, D17S1325 (all internal to the <i>BRCA1</i> locus) and D17S1323, D17S1327 (both telomeric to the <i>BRCA1</i> locus)) to measure allelic loss; PCR and restriction enzyme digest to identify three predominant mutations across <i>BRCA1</i> and <i>BRCA2</i> | Founder mutations in <i>BRCA1</i> [185delAG; 5382insC] and <i>BRCA2</i> [6174delT] | Vazina <i>et al</i> , 2000 | <u>(98)</u> |
| Somatic | Tumor sample from paraffin fixed sections            | PCR | Multiplex PCR                                                                                                                                                                                                                                                                                                                                                                   | Founder mutations in <i>BRCA1</i> [185delAG; 5382insC] and <i>BRCA2</i> [6174delT] | Giusti <i>et al</i> , 2003 | <u>(51)</u> |



| <i>Japan</i> |              |     |                                                                                                                                                                                                                                                                                                                                                                                                                                                                                                                                                                                                                                                                                                                                                                                                                                                                                                                                                                                                                                         |                                                                                                                                   |                                              |
|--------------|--------------|-----|-----------------------------------------------------------------------------------------------------------------------------------------------------------------------------------------------------------------------------------------------------------------------------------------------------------------------------------------------------------------------------------------------------------------------------------------------------------------------------------------------------------------------------------------------------------------------------------------------------------------------------------------------------------------------------------------------------------------------------------------------------------------------------------------------------------------------------------------------------------------------------------------------------------------------------------------------------------------------------------------------------------------------------------------|-----------------------------------------------------------------------------------------------------------------------------------|----------------------------------------------|
| Germline     | Blood sample | NGS | <p>Performed using a SureSelectHuman. All exon V5+lncRNA (Agilent) for preparing capture libraries. Sequencing reads were mapped to a reference genome (hg19) using BWA-mem and SAMtools. Focused on exonic and splicing variants. Synonymous variants were filtered out. Variants in the genomic super duplicated regions were removed. Database-registered single nucleotide polymorphisms (SNPs) were removed, except for clinically reported variants. Rare variants with minor allele frequency (MAF) of &lt;0.001 were filtered in from information from the NHLBI GO Exome Sequencing Project and the 1000 Genomes Project (1KGP). Allele frequency data from more than 60,000 individuals of Exome Aggregation Consortium (ExAC) was used as reference. For allele frequencies in Japanese, we referred to two databases of the integrative Japanese Genome Variation Database (iJGVD) and the Human Genetic Variation Database (HGVD). To further extract cancer-related genes, information from the CGC database was used</p> | <p>Looked for any germline variants in PC, reported for five <i>BRC42</i> variants (L61P, H1458R, G2508S, H3056Y, and R3384X)</p> | <p>Hayano <i>et al</i>, 2016</p> <p>(57)</p> |

|            |                                    |     |                                                                                                                                                                                                                                                                          |                                                                                            |                            |             |
|------------|------------------------------------|-----|--------------------------------------------------------------------------------------------------------------------------------------------------------------------------------------------------------------------------------------------------------------------------|--------------------------------------------------------------------------------------------|----------------------------|-------------|
| NR/unclear | Tumor sample                       | NGS | DNA was amplified by PCR using primers for the four polymorphic sites. PCR products were subjected to direct DNA sequencing. Sequence analysis of purified products was determined using the same primers with ABI 377 sequencer and dye terminator cycle sequencing kit | <i>MLH1</i> polymorphisms that lead to amino acid changes at codons 132, 219, 384, and 723 | Tanaka <i>et al</i> , 2009 | <u>(7)</u>  |
|            | Tumor and matched peripheral blood | PCR | DNA was amplified by PCR. LOH was determined using 7 highly polymorphic tandem repeat markers: D17S250, D17S1320, D17S855, D17S1322, D17S1323, D17S579 and D17S588. All coding regions from exons 1 to 24 of the <i>BRCA1</i> gene were analyzed                         | Mutations in <i>BRCA1</i> coding regions or LOH on chromosome 17q21                        | Uchida <i>et al</i> , 1999 | <u>(12)</u> |

| <i>Spain</i> |              |                   |                                                                                                                                                                                                                |                                                                                                                                     |                                |              |
|--------------|--------------|-------------------|----------------------------------------------------------------------------------------------------------------------------------------------------------------------------------------------------------------|-------------------------------------------------------------------------------------------------------------------------------------|--------------------------------|--------------|
| Germline     | Blood sample | Sanger sequencing | Validation of pathogenic mutations by Sanger, MLPA or additional NGS performed for 24 genes on the BROCA panel                                                                                                 | Aberrations in 24 undefined DNA-repair genes (reported primarily <i>BRCA1</i> , <i>BRCA2</i> , <i>ATM</i> , and <i>PALB2</i> genes) | Romero <i>et al</i> , 2017     | <u>(90)</u>  |
| <i>UK</i>    |              |                   |                                                                                                                                                                                                                |                                                                                                                                     |                                |              |
| Germline     | Blood sample | Other             | UKGPCS: The coding region of the <i>BRCA1</i> and <i>BRCA2</i> genes were screened using multiplex fluorescent heteroduplex detection, Sanger sequencing, and multiplex ligation-dependent probe amplification | Undefined <i>BRCA1</i> and <i>BRCA2</i>                                                                                             | Castro <i>et al</i> , 2011     | <u>(38)</u>  |
|              |              | PCR               | PCR followed by high-performance liquid chromatography or RFLP                                                                                                                                                 | Five <i>ATM</i> single-nucleotide polymorphisms: 5557G>A, 5558A>T, 3161C>G, ivs38-8t>c, ivs38-15g>c                                 | Angele <i>et al</i> , 2004     | <u>(13)</u>  |
|              |              |                   | High-throughput multiplex fluorescent heteroduplex analysis method. Multiplexed, dye-tagged PCR fragments were run on an ABI3130xl Genetic Analyzer. Genetic alterations were confirmed by sequencing          | germline mutations in <i>BRCA2</i>                                                                                                  | Kote-Jarai <i>et al</i> , 2011 | <u>(104)</u> |

|          |                                   |                    |                                                                                                                                                                                                                                                                                                                                                                                                                                                      |                                                                                                                                                                                                                                                                                 |                                     |       |
|----------|-----------------------------------|--------------------|------------------------------------------------------------------------------------------------------------------------------------------------------------------------------------------------------------------------------------------------------------------------------------------------------------------------------------------------------------------------------------------------------------------------------------------------------|---------------------------------------------------------------------------------------------------------------------------------------------------------------------------------------------------------------------------------------------------------------------------------|-------------------------------------|-------|
|          |                                   |                    | Mutations detected by multiplex PCR, sequenced to identify variants, and deleterious mutations were confirmed by Sanger sequencing                                                                                                                                                                                                                                                                                                                   | <i>BRCA1</i> (4 variants: c.68_69delAG; c.212+1G>T; c.1954dupA; c.2475delC)                                                                                                                                                                                                     | Leongamo-rnlert <i>et al</i> , 2012 | (69)  |
|          |                                   |                    | PCR and fluorescent mutation detection. Sequencing to characterise mutations                                                                                                                                                                                                                                                                                                                                                                         | <i>BRCA2</i> germline mutations                                                                                                                                                                                                                                                 | Edwards <i>et al</i> , 2003         | (105) |
| Germline |                                   | Capture sequencing | Sequenced for 22 tumor suppressor genes using Agilent target enrichment and Illumina technology                                                                                                                                                                                                                                                                                                                                                      | 22 tumor suppressor genes including <i>ATM</i> , <i>BRCA1</i> , <i>BRCA2</i> , <i>CHEK2</i> , <i>MLH1</i> , <i>MRE11A</i> , <i>NBN</i> , <i>PALB2</i> , <i>RAD51C</i> , <i>BARD1</i> , <i>BRIP1</i> , <i>MSH2</i> , <i>MSH6</i> , <i>MUTYH</i> , <i>PMS2</i> , and <i>RAD50</i> | Leongamo-rnlert <i>et al</i> , 2014 | (70)  |
| Germline | Peripheral blood and tumor tissue | PCR                | <i>BRCA1</i> and <i>BRCA2</i> were both screened for germline mutations using a combination of the protein truncation test (PTT) and a non-radioactive heteroduplex analysis (HA) to identify variants in the sample set. PTT was used to analyse exon 11 of <i>BRCA1</i> (representing approximately 60% of the coding sequence), and exons 10 and 11 <i>BRCA2</i> (60% of the coding sequence). Direct sequence analysis was used for confirmation | Undefined <i>BRCA1</i> and <i>BRCA2</i>                                                                                                                                                                                                                                         | Gayther <i>et al</i> , 2000         | (50)  |

|            |                                         |       |                                                                                                                                                                                                                                                               |                                                                                                                             |                                 |       |
|------------|-----------------------------------------|-------|---------------------------------------------------------------------------------------------------------------------------------------------------------------------------------------------------------------------------------------------------------------|-----------------------------------------------------------------------------------------------------------------------------|---------------------------------|-------|
| Somatic    | Tumor biopsy                            | NGS   | The Sanger CGP Cancer Genes V3 panel of 365 genes was screened. Eight samples were sequenced to a median depth of 962 reads (IQR, 896-983X) in the target regions, with a median of 93% (IQR, 92.5%-93%) of the target regions being covered at a depth >100× | 365 target genes, which included all our genes of interest (except <i>RAD51C</i> ) and <i>CDK12</i>                         | Manson-Bahr <i>et al</i> , 2015 | (73)  |
|            | Formalin-fixed paraffin embedded (FFPE) | NGS   | Targeted-NGS was performed using the Life Technologies Ion Torrent: Ion AmpliSeq Cancer Hotspot Panel v2 and the Ion Personal Genome Machine sequencer. The hotspot panel covers ~2800 COSMIC mutations of 50 oncogenes and tumor suppressor genes            | DNA repair genes such as <i>ATM</i> (no further definition)                                                                 | Jefferies <i>et al</i> , 2017   | (61)  |
| <b>USA</b> |                                         |       |                                                                                                                                                                                                                                                               |                                                                                                                             |                                 |       |
| Germline   | Blood sample                            | NGS   | Next-generation targeted sequencing using the Illumina TruSight Cancer Sequencing panel that includes 94 genes (35 have been identified as being involved in human DNA repair)                                                                                | 35 undefined DDR genes. Results were presented for <i>BRCA2</i> , <i>ATM</i> , <i>BLM</i> , <i>FANCA</i> , <i>MSH2</i> only | Pomerantz <i>et al</i> , 2017   | (85)  |
|            |                                         | Other | TaqMan SNP genotyping assay                                                                                                                                                                                                                                   | 5557G>A                                                                                                                     | Zhu <i>et al</i> , 2010         | (101) |

|          |              |     |                                                                                                                                                                                                                                                                                            |                                                                                                                                                                                                                                |                               |      |
|----------|--------------|-----|--------------------------------------------------------------------------------------------------------------------------------------------------------------------------------------------------------------------------------------------------------------------------------------------|--------------------------------------------------------------------------------------------------------------------------------------------------------------------------------------------------------------------------------|-------------------------------|------|
|          |              | PCR | PCR was used to amplify each of the 62 exons, and short intronic regions flanking each exon, that constitute the coding region of the <i>ATM</i> gene                                                                                                                                      | Fifty-nine <i>ATM</i> genetic alterations, representing 25 different variants, were found in the expressed portions (exons) of the <i>ATM</i> gene, or within 10 nucleotides of each exon encompassing potential splice sites. | Cesaretti <i>et al</i> , 2007 | (41) |
|          |              |     | The TaqMan (fluorogenic 5' nuclease) assay was used for SNP genotyping                                                                                                                                                                                                                     | <i>BRCA1</i> *185delAG and <i>BRCA2</i> *6174delT                                                                                                                                                                              | Gallagher <i>et al</i> , 2012 | (48) |
| Germline | Blood sample | PCR | PCR products were analysed by RFLP, using modified sites (ACRES) for restriction enzymes TaqI (185delAG), DdeI (538insC), and BstXI [6174delT (15)]. Carriers were recognized by the comparison of test digest with digests of PCR analyses of previously verified <i>BRCA1/2</i> carriers | <i>BRCA1</i> (185delAG, 5382insC) and <i>BRCA2</i> (6174delT)                                                                                                                                                                  | Kirchoff <i>et al</i> , 2004  | (63) |
|          |              |     | Aliquots of amplified DNA were transferred to membranes (Hybond) using a standard protocol (Sambrook <i>et al</i> , 1989)                                                                                                                                                                  | <i>BRCA1</i> (185delAG) and <i>BRCA2</i> (6174delT)                                                                                                                                                                            | Lehrer <i>et al</i> , 1998    | (68) |
|          |              |     | Genomic DNA was purified and amplified using 47 primer pairs and sequenced using BigDye Terminator v3.1 sequencing kit                                                                                                                                                                     | Protein truncating or SNP <i>BRCA2</i> mutations. (4625_4629delACATT and 4074_4075delGT; both in exon 11).                                                                                                                     | Agalliu <i>et al</i> , 2007   | (31) |

|  |  |     |                                                                                                                                                                                                                                                                     |                                                                                                                                                                                                                      |                             |             |
|--|--|-----|---------------------------------------------------------------------------------------------------------------------------------------------------------------------------------------------------------------------------------------------------------------------|----------------------------------------------------------------------------------------------------------------------------------------------------------------------------------------------------------------------|-----------------------------|-------------|
|  |  | WES | Variants were restricted to a subset of 157 target genes associated with hereditary cancer risk                                                                                                                                                                     | 157 target genes associated with hereditary cancer risk (ST1). Results reported for <i>ATM</i> , <i>ATR</i> , <i>BRCA2</i> , <i>FANCL</i> , <i>MSR1</i> , <i>MUTYH</i> , <i>RBI</i> , <i>TSHR</i> , and <i>WRN</i> . | Hart <i>et al</i> , 2016    | <u>(56)</u> |
|  |  |     | Exome sequencing of germline DNA was performed at 30x coverage using a VCRome kit for library preparation, and 100bp paired end processing using the HiSeq platform. Human hg19 reference-guided alignment and variant calling were performed using Illumina CASAVA | High value DDR or androgen signalling pathway gene variants that may contribute to familial prostate risk. 826 genes analysed including all DDR genes of interest.                                                   | Nicolas <i>et al</i> , 2015 | <u>(24)</u> |

|          |    |            |                                                                                                                                                                                                                                                                                                                                                                                                                                                                                                                                                                                                               |                                                                                                                                                                                                             |                                 |      |
|----------|----|------------|---------------------------------------------------------------------------------------------------------------------------------------------------------------------------------------------------------------------------------------------------------------------------------------------------------------------------------------------------------------------------------------------------------------------------------------------------------------------------------------------------------------------------------------------------------------------------------------------------------------|-------------------------------------------------------------------------------------------------------------------------------------------------------------------------------------------------------------|---------------------------------|------|
|          |    |            | WES focused on the exonic regions of 50 known DDR genes. The final exome library was sequenced using an Illumina HiSeq 3000 for 75 bp paired-end sequencing with a target sequencing coverage of 30x. Only protein-truncating alterations (nonsense/stop-gains, frameshift insertions and deletions, and donor and acceptor splice-site mutations) were coded as pathogenic or likely pathogenic for the current analysis, while missense and other variants of undetermined significance or alterations with lower levels of evidence were excluded, unless specifically designated as pathogenic in ClinVar | 50 defined DDR genes including <i>ATM</i> , <i>ATR</i> , <i>BRCA1</i> , <i>BRCA2</i> , <i>CDK12</i> , <i>CHEK2</i> , <i>FANCA</i> , <i>MLH1</i> , <i>MRE11A</i> , <i>NBN</i> , <i>PALB2</i> , <i>RAD51C</i> | Antonarakis <i>et al</i> , 2018 | (34) |
| Germline | NR | NR/unclear | Hereditary cancer multi-gene panel test (MGPT) was used to identify pathogenic or likely pathogenic variant frequencies for 34 genes known to predispose to at least one of the six included cancers                                                                                                                                                                                                                                                                                                                                                                                                          | Undefined 34-gene hereditary cancer multi-gene panel test (MGPT). Included <i>ATM</i> , <i>BRCA1</i> , <i>BRCA2</i> , <i>CHEK2</i> , <i>FANCA</i> , and <i>PALB2</i> ; unclear for others.                  | LaDuca <i>et al</i> , 2017      | (65) |
|          |    |            | Genetic testing using a commercially available panel (Invitae) consisting of 25-79 cancer-related genes to identify mutations and selected exonic deletions/duplications                                                                                                                                                                                                                                                                                                                                                                                                                                      | Undefined 25-79 cancer-related genes. Included <i>ATM</i> , <i>BRCA1</i> , <i>BRCA2</i> , <i>CHEK2</i> , and <i>NBN</i> ; unclear for others.                                                               | Ledet <i>et al</i> , 2017       | (67) |



|  |                                    |       |                                                                                                                                                                                                    |                                                                                                                                                                 |                               |             |
|--|------------------------------------|-------|----------------------------------------------------------------------------------------------------------------------------------------------------------------------------------------------------|-----------------------------------------------------------------------------------------------------------------------------------------------------------------|-------------------------------|-------------|
|  |                                    |       | NR                                                                                                                                                                                                 | Multi-gene hereditary panel testing (32 undefined cancer genes). Results reported for <i>ATM</i> , <i>BRCA1</i> , <i>BRCA2</i> , <i>CHEK2</i> , and <i>MSH6</i> | Marshall <i>et al</i> , 2017  | <u>(74)</u> |
|  |                                    |       | DNA sequencing and exon-level copy number analysis                                                                                                                                                 | DDR (included 14 undefined genes on a hereditary PCa panel, most of which were DNA repair genes, results reported for <i>BRCA</i> and <i>BRCA2</i> )            | Nicolosi <i>et al</i> , 2017  | <u>(81)</u> |
|  | Buccal cells and/or a blood sample | PCR   | Genomic DNA from blood /buccal swabs using Puregene DNA Isolation kit (Gentra Systems). DNA content quantified using PicoGreen dsDNA quantitation kit using a Perkin-Elmer HTS7000 BioAssay Reader | <i>BRCA1</i> (185delAG, 5382insC) and <i>BRCA2</i> (6174delT)                                                                                                   | Agalliu <i>et al</i> , 2009   | <u>(32)</u> |
|  | Archived blood DNA specimens       | Other | Ion AmpliSeq targeted sequencing                                                                                                                                                                   | <i>BRCA1</i> , <i>BRCA2</i> (undefined)                                                                                                                         | Petrovics <i>et al</i> , 2016 | <u>(84)</u> |
|  | Tumor sample                       | PCR   | ABI Prism 7900 HT sequence detection system using Taqman probes                                                                                                                                    | <i>ATM</i> (homozygous IVS62+60G/G, heterozygous IVS62+60G/A, and homozygous IVS62+60A/A)                                                                       | Browning <i>et al</i> , 2006  | <u>(14)</u> |

|                              |                         |            |                                                                                                                                                                                                                                                                                                                                                                                        |                                                                                                                                                                                                                                                                                                                                                                                    |                           |             |
|------------------------------|-------------------------|------------|----------------------------------------------------------------------------------------------------------------------------------------------------------------------------------------------------------------------------------------------------------------------------------------------------------------------------------------------------------------------------------------|------------------------------------------------------------------------------------------------------------------------------------------------------------------------------------------------------------------------------------------------------------------------------------------------------------------------------------------------------------------------------------|---------------------------|-------------|
| Germline                     | Tumor sample            | Microarray | Purified total RNA was whole-transcriptome amplified using the WT-Ovation FFPE system, fragmented and labelled using the Encore Biotin Module, and hybridized to Affymetrix Human Exon 1.0 ST GeneChips. Profiling of 9 DDR pathways using 17 gene sets for GSEA (Gene Set Enrichment Analysis) of high-density microarray gene expression data                                        | 17 gene sets involving 9 DDR gene pathways (over 200 genes analysed including all DDR genes of interest).                                                                                                                                                                                                                                                                          | Evans <i>et al</i> , 2016 | <u>(45)</u> |
| Germline and somatic (mixed) | Tumor and matched blood | NGS        | MSK-IMPACT sequencing assay. Germline variants were identified in matched blood samples and filtered out in the somatic analysis process. Mutation clonality was estimated as a cancer cell fraction, and implemented in the FACETS algorithm. Germline analysis of 76 known cancer predisposing genes was performed as previously described (ref 16a - Schrader 2016 (not in library) | Memorial Sloan Kettering-Integrated Mutation Profiling of Actionable Cancer Targets (MSK-IMPACT) gene oncopanel that targets 410 cancer-associated genes plus germline analysis of 76 known cancer-predisposing genes (germline). This included <i>ATM</i> , <i>BRCA1</i> , <i>BRCA2</i> , <i>CHEK2</i> , <i>FANCA</i> , <i>MLH1</i> , and <i>NBN</i> , but was unclear for others | Abida <i>et al</i> , 2017 | <u>(30)</u> |

|                |                                                                                     |                      |                                                                                                                                                                                                                                                                                                                                                                                                                                                                                                                                                       |                        |                             |       |
|----------------|-------------------------------------------------------------------------------------|----------------------|-------------------------------------------------------------------------------------------------------------------------------------------------------------------------------------------------------------------------------------------------------------------------------------------------------------------------------------------------------------------------------------------------------------------------------------------------------------------------------------------------------------------------------------------------------|------------------------|-----------------------------|-------|
|                | Tumor with matched adjacent normal tissue biopsy or peripheral blood or buccal swab | IHC/<br>ISH/<br>FISH | <i>FANCA</i> gene specific probe (BAC clone RP11-79A1) and a reference probe located at 16p12 (BAC clone RP11-450G5) were used for this approach. Five- $\mu$ m thick tissue sections were used for FISH analysis. Deletion was defined as presence of only copy of <i>FANCA</i> specific probe in the presence of two reference signals, per nucleus. At least 100 nuclei were evaluated per tissue section or 50 nuclei per tissue core in tissue microarrays (TMAs), using a fluorescence microscope (Olympus BX51; Olympus Optical, Tokyo, Japan) | <i>FANCA</i> deletions | Beltran <i>et al</i> , 2015 | (19)  |
|                | Tumor sample                                                                        | PCR                  | DNA isolated from tumor tissues was paired with primers targeting exons 10-14. Products were subject to direct sequencing                                                                                                                                                                                                                                                                                                                                                                                                                             | <i>CHEK2</i>           | Wu <i>et al</i> , 2006      | (100) |
| NR/<br>unclear | Genomic DNA                                                                         | NGS                  | Targeted sequencing                                                                                                                                                                                                                                                                                                                                                                                                                                                                                                                                   | <i>NBN</i>             | Zuhlke <i>et al</i> , 2012  | (102) |
|                | NR                                                                                  | Other                | sequencing (NGS, Sanger, pyrosequencing)                                                                                                                                                                                                                                                                                                                                                                                                                                                                                                              | <i>ATM</i>             | Feldman <i>et al</i> , 2014 | (10)  |

|                |                                                                                     |       |                                                                                                                                                                                                                                                                                                                                       |                                                                                                                                                                               |                              |             |
|----------------|-------------------------------------------------------------------------------------|-------|---------------------------------------------------------------------------------------------------------------------------------------------------------------------------------------------------------------------------------------------------------------------------------------------------------------------------------------|-------------------------------------------------------------------------------------------------------------------------------------------------------------------------------|------------------------------|-------------|
| NR/<br>unclear | Non-tumor tissue (principally lymph Nodes), formalin fixed and embedded in paraffin | PCR   | Genomic DNA from sections from paraffin blocks then processing using a tissue DNA isolation kit (Qiagen). Mutant alleles detected by heteroduplex analysis (HDA) of the PCR products. Amplification products of primer pair A sequenced from nested primer for each on an ABI 373A sequencer at the Columbia University Cancer Center | <i>BRCA1</i> (185delAG) and <i>BRCA2</i> (6174delT)                                                                                                                           | Nastiuk <i>et al</i> , 1999  | <u>(78)</u> |
|                | Tumor tissue or blood sample                                                        | NGS   | NR                                                                                                                                                                                                                                                                                                                                    | <i>BRCA1</i> , <i>BRCA2</i>                                                                                                                                                   | Daniel <i>et al</i> , 2017   | <u>(9)</u>  |
|                | Tumor biopsy                                                                        | Other | DNA underwent hybrid capture for all coding exons of 395 cancer-related genes. Utilized two described lists of genes involved in DNA repair: our own in-house list of 74 (UCD) and a list of 20 DNA repair genes associated with cancer predisposition syndromes utilized in a recent publication by Pritchard et al                  | Genes involved in DNA repair, associated with cancer predisposition syndromes. Undefined but included <i>ATM</i> , <i>ATR</i> , <i>BRCA1</i> , <i>BRCA2</i> , and <i>MLH1</i> | Dall'Era <i>et al</i> , 2017 | <u>(8)</u>  |

|         |                         |       |                                                                                                                                                                                                                                                                           |                                                                                                                                                                                                                                  |                               |      |
|---------|-------------------------|-------|---------------------------------------------------------------------------------------------------------------------------------------------------------------------------------------------------------------------------------------------------------------------------|----------------------------------------------------------------------------------------------------------------------------------------------------------------------------------------------------------------------------------|-------------------------------|------|
|         |                         | NGS   | Molecular profiles of PC tumor samples were defined. Protein expression (IHC), gene amplification (ISH), and NGS were performed. Unclassified variants were included for analysis. In a limited cohort of patients tested used a 592-gene hybrid capture NGS              | A panel of 30 undefined DNA repair genes was used to define DNA repair intact (DRI) and DNA repair deficient (DRD) subgroups. Unclassified variants were included for analysis. Results reported for <i>ATM</i> , <i>BRCA2</i> . | Dawson <i>et al</i> , 2016    | (11) |
| Somatic | NR                      | Other | Tests included gene sequencing (Sanger or NGS), protein expression (IHC), and/or gene amplification (C/FISH)                                                                                                                                                              | <i>BRCA1</i> , <i>BRCA2</i> (undefined)                                                                                                                                                                                          | Myers <i>et al</i> , 2016     | (76) |
|         | Tumor and needle biopsy | NGS   | UW-OncoPlex was performed. Microsatellite instability (MSI) testing was performed directly on NGS data using the mSINGS method. Total mutation burden was estimated from targeted NGS data as previously described, with hyper-mutation defined as >12 mutations/megabase | Undefined mismatch repair genes (including <i>MLH1</i> ) and homologous repair (including <i>BRCA2</i> , <i>CHEK2</i> )                                                                                                          | Schweizer <i>et al</i> , 2016 | (27) |

|         |                                                                              |     |                                                                                                                                                                                                                                                                                                                                                                                                                                                                     |                                                                                                                                                                                                        |                              |      |
|---------|------------------------------------------------------------------------------|-----|---------------------------------------------------------------------------------------------------------------------------------------------------------------------------------------------------------------------------------------------------------------------------------------------------------------------------------------------------------------------------------------------------------------------------------------------------------------------|--------------------------------------------------------------------------------------------------------------------------------------------------------------------------------------------------------|------------------------------|------|
| Somatic | Cell-free DNA (cfDNA) present in the plasma                                  | PCR | cfDNA was isolated from patient plasma samples using the Qiagen circulating nucleic acid kit. 100ng of cfDNA was utilized for library construction; and the libraries were paired-end sequenced on the Illumina HiSeq 2000. Focused analysis on copy number variations related to AR associated and DNA repair genes                                                                                                                                                | DNA repair genes partial/full amplifications ( <i>BRCA1</i> , <i>BRCA2</i> , <i>ATM</i> , <i>CDK12</i> , <i>MLH1</i> , and/or <i>MSH2</i> ).                                                           | Gambhira <i>et al</i> , 2016 | (17) |
|         | Cell-free DNA (cfDNA) present in the plasma and matched blood lymphocyte DNA | NGS | Plasma DNA was used to prepare DNA libraries using a NEXTflex DNA-Seq kit. The Comprehensive Cancer Panel (Roche NimbleGen, Madison, WI) was used for NGS. The panel covers 4Mb genomic sequences and targets 578 cancer-related genes. Gene mutations were detected by comparing cfDNA to lymphocyte gDNA in the same patient with 2% variant alleles as the cut-off for mutation calls. Allele-specific PCR was used to validate mutations detected by sequencing | Comprehensive Cancer Panel (578 cancer-related genes). Results reported for <i>ATM</i> , <i>ATR</i> , <i>CHEK2</i> , <i>FANCA</i> , <i>MLH1</i> , and <i>NBN</i> (unclear for other genes of interest) | Xia <i>et al</i> , 2015      | (18) |
|         | Circulating tumor DNA                                                        | PCR | A publicly-accessible assay (Guardant Health) was used to analyse 68 known cancer genes for anomalies (missense mutations, amplifications) by a digital PCR technique                                                                                                                                                                                                                                                                                               | DNA repair genes ( <i>BRCA1</i> , <i>BRCA2</i> , or <i>ATM</i> )                                                                                                                                       | Gourdin <i>et al</i> , 2016  | (52) |

|         |                                        |                    |                                                                                                                                                                                                                                                                                                                                                                                                     |                                                                                                                                                                  |                               |      |
|---------|----------------------------------------|--------------------|-----------------------------------------------------------------------------------------------------------------------------------------------------------------------------------------------------------------------------------------------------------------------------------------------------------------------------------------------------------------------------------------------------|------------------------------------------------------------------------------------------------------------------------------------------------------------------|-------------------------------|------|
|         | Circulating tumor DNA; tumor tissue    | NGS                | Foundation ACT NGS assay; Foundation One NGS assay                                                                                                                                                                                                                                                                                                                                                  | <i>BRCA1</i> and <i>BRCA2</i> alterations                                                                                                                        | Lara <i>et al</i> , 2017      | (66) |
|         | Tumor biopsy and matched normal tissue | Capture sequencing | Sequenced exome to identify mutations using exome libraries of matched pairs of tumor /normal genomic DNAs. All captured DNA libraries were sequenced with the Illumina GAI Genome Analyser or the Illumina HiSeq. Considered only mutations called at covered annotated targeted positions. Sanger sequencing used to validate                                                                     | <i>ATM</i> , <i>BRCA2</i>                                                                                                                                        | Grasso <i>et al</i> , 2012    | (53) |
|         | Tumor sample                           | NGS                | PCR-based NGS                                                                                                                                                                                                                                                                                                                                                                                       | <i>BRCA2</i> (K2524fs)                                                                                                                                           | Palapattu <i>et al</i> , 2015 | (20) |
| Somatic | Tumor sample                           | NGS                | Targeted NGS using the OncoPanel platform (includes point mutations, insertions, and deletions within exons and select introns/enhancers of 300 candidate genes with a role in oncogenesis). The CIMBA database of published germline <i>BRCA2</i> mutations was used to determine whether <i>BRCA2</i> mutations found in the prostate tumors studied here have also been reported in the germline | 300 genes in the OncoPanel platform. Results reported for <i>ATM</i> , <i>BRCA1</i> , <i>BRCA2</i> , and <i>PALB2</i> (unclear for other DDR genes of interest). | Patel <i>et al</i> , 2016     | (83) |

|  |              |     |                                                                                                                                                                                                                                                                                                                        |                                                                                                                                                                                                                                                            |                               |             |
|--|--------------|-----|------------------------------------------------------------------------------------------------------------------------------------------------------------------------------------------------------------------------------------------------------------------------------------------------------------------------|------------------------------------------------------------------------------------------------------------------------------------------------------------------------------------------------------------------------------------------------------------|-------------------------------|-------------|
|  | Tumor sample | NGS | Fresh-frozen metastatic prostate lesions. DNA fragment libraries for each of the RainDance-amplified PCR samples were constructed for sequence analysis on the SOLiD next-generation sequencing platform. After PCR, massively parallel sequencing was conducted for 577 candidate genes                               | Somatic copy number alterations in 577 undefined cancer related genes, result reported for <i>BRCA2</i> (unclear if other included in definition)                                                                                                          | Robbins <i>et al</i> , 2011   | <u>(21)</u> |
|  |              | PCR | Paired end sequencing (49x49 cycles) was performed using the HiSeq 2000 (based on libraries that were hybrid captured with custom biotinylated RNA oligo pools) and mapped to the reference human genome (hg19). All copy number alterations involving <i>BRCA2</i> that were identified by NGS were confirmed by FISH | 182 cancer-related genes (3230 exons) and 14 commonly rearranged genes (37 introns). Included all DDR genes of interest (except <i>MRE11A</i> , <i>NBN</i> , and <i>PALB2</i> )                                                                            | Beltran <i>et al</i> , 2013   | <u>(22)</u> |
|  |              |     | Autopsy samples; formalin-fixed paraffin-embedded tissue or from fresh-frozen tissue Microsatellite instability PCR, Exome sequencing, targeted deep sequencing                                                                                                                                                        | MMR hyper-mutation (>300 somatic protein altering mutations based on the distribution of total mutation burden in metastatic tumors, which had matched normal tissue available); Undefined list which included <i>MSH2</i> , <i>MSH6</i> , and <i>MLH1</i> | Pritchard <i>et al</i> , 2014 | <u>(86)</u> |



|  |                                                |      |                                                                                                |                                             |                              |      |
|--|------------------------------------------------|------|------------------------------------------------------------------------------------------------|---------------------------------------------|------------------------------|------|
|  | Single cell suspensions and touch preparations | FISH | P1 phage FISH probes were prepared, LOH experiments were carried out 'as previously described' | <i>BRCA1</i> , 3 flanking sites on 17q12-21 | Williams <i>et al</i> , 1996 | (99) |
|--|------------------------------------------------|------|------------------------------------------------------------------------------------------------|---------------------------------------------|------------------------------|------|

| <i>Multi-national</i> |                                                            |       |                                                                                                                                                                                                                                                                                                                                                                                                                                                                                                                                                                                                                            |                                                                                                                                                              |                            |       |
|-----------------------|------------------------------------------------------------|-------|----------------------------------------------------------------------------------------------------------------------------------------------------------------------------------------------------------------------------------------------------------------------------------------------------------------------------------------------------------------------------------------------------------------------------------------------------------------------------------------------------------------------------------------------------------------------------------------------------------------------------|--------------------------------------------------------------------------------------------------------------------------------------------------------------|----------------------------|-------|
| Germline              | Blood sample                                               | WES   | WES performed on germline DNA using an Illumina HiSeq 2500 system. The mean sequencing depth of coverage was 71x. In addition, a customized next-generation sequencing panel targeting 222 cancer related genes was used to sequence the germline DNA of the remaining lethal PCa patients and all the indolent PCa patients. The mean sequencing depth of coverage was 135 overall and was 180, 208, and 219 for <i>ATM</i> , <i>BRCA1</i> , and <i>BRCA2</i> , respectively. All the targeted bases in these three genes were successfully sequenced (> 20) in >99% samples. Sanger sequencing was used for confirmation | <i>ATM</i> , <i>BRCA1</i> , <i>BRCA2</i>                                                                                                                     | Na <i>et al</i> , 2017     | (106) |
|                       | Blood lymphocyte, saliva, or tissue uninvolved with cancer | Other | Multiplex sequencing assays                                                                                                                                                                                                                                                                                                                                                                                                                                                                                                                                                                                                | Undefined 20 DRGs associated with autosomal dominant cancer predisposition syndromes. Included all DDR genes of interest except <i>FANCA</i> and <i>MLH1</i> | Nelson <i>et al</i> , 2016 | (79)  |

|                              |                                                          |       |                                                                                                                                                                                                                                                                                                                                                                                                                                                                                             |                                                                                                                                                                                                                                                                                                                                                                                                                                                                                                                                                                                                                                                                                                                                                                                                                                                                                                                                                                                                                  |                               |      |
|------------------------------|----------------------------------------------------------|-------|---------------------------------------------------------------------------------------------------------------------------------------------------------------------------------------------------------------------------------------------------------------------------------------------------------------------------------------------------------------------------------------------------------------------------------------------------------------------------------------------|------------------------------------------------------------------------------------------------------------------------------------------------------------------------------------------------------------------------------------------------------------------------------------------------------------------------------------------------------------------------------------------------------------------------------------------------------------------------------------------------------------------------------------------------------------------------------------------------------------------------------------------------------------------------------------------------------------------------------------------------------------------------------------------------------------------------------------------------------------------------------------------------------------------------------------------------------------------------------------------------------------------|-------------------------------|------|
|                              | Buccal swabs, buffy coats, whole blood, non-tumor tissue | Other | Case series 1,2,6: whole exome sequencing of germline and tumor DNA; case series 3: libraries for targeted sequencing constructed using customized GeneRead Dnaseq Panel covering 53 genes and run on the Illumina MiSeq Sequencer; case series 4: Targeted deep sequencing performed using BROCA panel of 53 DNA repair pathway genes; case series 5: exome sequencing; case series 7: genomic sequencing performed using MSK-IMPACT hybrid capture-based next-generation sequencing assay | <i>ATM, ATR, BAP1, BARD1, BRCA1, BRCA2, BRIP1, CHEK2, FANCA, FANCB, FANCD1, FANCD2, FANCI, FANCG, FANCD3, FANCD4, FANCD5, FANCD6, FANCD7, FANCD8, FANCD9, FANCD10, FANCD11, FANCD12, FANCD13, FANCD14, FANCD15, FANCD16, FANCD17, FANCD18, FANCD19, FANCD20, FANCD21, FANCD22, FANCD23, FANCD24, FANCD25, FANCD26, FANCD27, FANCD28, FANCD29, FANCD30, FANCD31, FANCD32, FANCD33, FANCD34, FANCD35, FANCD36, FANCD37, FANCD38, FANCD39, FANCD40, FANCD41, FANCD42, FANCD43, FANCD44, FANCD45, FANCD46, FANCD47, FANCD48, FANCD49, FANCD50, FANCD51, FANCD52, FANCD53, FANCD54, FANCD55, FANCD56, FANCD57, FANCD58, FANCD59, FANCD60, FANCD61, FANCD62, FANCD63, FANCD64, FANCD65, FANCD66, FANCD67, FANCD68, FANCD69, FANCD70, FANCD71, FANCD72, FANCD73, FANCD74, FANCD75, FANCD76, FANCD77, FANCD78, FANCD79, FANCD80, FANCD81, FANCD82, FANCD83, FANCD84, FANCD85, FANCD86, FANCD87, FANCD88, FANCD89, FANCD90, FANCD91, FANCD92, FANCD93, FANCD94, FANCD95, FANCD96, FANCD97, FANCD98, FANCD99, FANCD100</i> | Pritchard <i>et al</i> , 2016 | (87) |
| Germline and somatic (mixed) | Tumor sample                                             | Other | Searched for candidate germline cancer predisposition variants in the exome sequence data (Cancer Genome Atlas). Sequencing data were aligned to GRCh37-lite version of the human reference using BWA v0.5.9 and de-duplicated using Picard 1.29                                                                                                                                                                                                                                            | Undefined candidate cancer-associated genes (including <i>ATM, ATR, BRCA1, BRCA2, FANCA, and PALB2</i> )                                                                                                                                                                                                                                                                                                                                                                                                                                                                                                                                                                                                                                                                                                                                                                                                                                                                                                         | Lu <i>et al</i> , 2015        | (71) |
| Germline and somatic (mixed) | Tumor sample                                             | WES   | Whole-exome capture libraries constructed using DNA from normal and tumor tissue subjected to hybrid capture using SureSelect Exome v4 baits (Agilent) and aligned to the hg19 human genome build                                                                                                                                                                                                                                                                                           | Somatic mutations, copy number alterations, and oncogenic structural DNA rearrangements. Included <i>ATM, BRCA1, BRCA2, CHEK2, MLH1, and PALB2</i>                                                                                                                                                                                                                                                                                                                                                                                                                                                                                                                                                                                                                                                                                                                                                                                                                                                               | Robinson <i>et al</i> , 2015  | (89) |

|                |    |     |                                                                                                                                                                                                                                                                                                                                                                                                                                                                       |                                                                                                                     |                              |      |
|----------------|----|-----|-----------------------------------------------------------------------------------------------------------------------------------------------------------------------------------------------------------------------------------------------------------------------------------------------------------------------------------------------------------------------------------------------------------------------------------------------------------------------|---------------------------------------------------------------------------------------------------------------------|------------------------------|------|
|                |    |     | DNA sequenced with the Illumina HiSeq 2000 Genome Analyzer. Reads were aligned to the NCBI GRCh37 human reference genome. The authors performed SNV and indel discovery, genotyping and variant quality score recalibration in all tumor and germline samples simultaneously, according to the GATK HaplotypeCaller v.3.2 best practices recommendations                                                                                                              | <i>BRC A2</i> . Germline and somatic variants, including single nucleotide variants, indels and structural variants | Decker <i>et al</i> , 2016   | (43) |
| NR/<br>unclear | NR | PCR | Samples genotyped for 657del5 alteration using either ABI3100 and fluorescently labelled PCR (Mayo Clinic, University of Michigan and Universitätsklinikum Ulm), direct sequencing using an Amersham Megabase (Johns Hopkins), or by DNA sequencing (Tampere University Hospital). E185Q and D95N genotyped were obtained using minisequencing (Tampere University Hospital). R215W genotypes were determined using ddNTP-primer extension (Universitätsklinikum Ulm) | <i>NBN</i> 657del5 mutation                                                                                         | Hebbring <i>et al</i> , 2006 | (58) |

|         |              |     |                                                                                                                                                                                                                                                                                |                                                                                                                                                                                                                                                                                                      |                              |      |
|---------|--------------|-----|--------------------------------------------------------------------------------------------------------------------------------------------------------------------------------------------------------------------------------------------------------------------------------|------------------------------------------------------------------------------------------------------------------------------------------------------------------------------------------------------------------------------------------------------------------------------------------------------|------------------------------|------|
| Somatic | Tumor sample | NGS | <p>After hybridisation capture, sequencing was performed (Illumina HiSeq 2500). Raw sequences were aligned to the human genome reference sequence. An in-house tool identified the somatic single nucleotide variants (SNVs) by comparing the tumor to its matched normal.</p> | <p>DDR gene alterations that may be related to prostate cancer progression, including undefined genes related to DDR pathways (n=112), recurrently mutated genes in PC (n=334), and other cancer-related genes (n=77). Reported <i>BRCA2</i> and <i>NBN</i>; unclear for other genes of interest</p> | Fontugne <i>et al</i> , 2015 | (47) |
|         |              |     | <p>NGS extracted from FFPE tumor tissue. Included sequencing of 45 DDR genes</p>                                                                                                                                                                                               | <p>Sequencing of 45 DDR genes (including <i>ATR</i>, <i>ATM</i>, <i>BRCA1</i>, <i>BRCA2</i>, <i>CDK12</i>, <i>CHEK2</i>, <i>FANCA</i>, <i>NBN</i>, <i>PALB2</i>, <i>PPP2R2A</i>, <i>RAD52</i>, <i>RAD50</i>, and <i>RPA1MS1</i>)</p>                                                                 | Timms <i>et al</i> , 2016    | (96) |
| Somatic | Tumor sample | WES | <p>Whole-exome capture was performed using the Agilent SureSelect Human All Exon protocol containing 188,260 exons from ≈18,560 genes. Sequencing was performed on the Illumina HiSeq 2000 platform</p>                                                                        | <p>DDR included <i>ATM</i>, <i>BRCA1</i>, <i>BRCA2</i>, <i>FANCD2</i>, <i>MLH1</i>, and <i>RAD51C0</i>. Unclear for other DDR genes of interest.</p>                                                                                                                                                 | Cancer Genome Atlas 2015     | (37) |

|                              |                       |                         |                                                                                                                                                                                                                                                                                                                                                          |                                                                                                                                                            |                              |      |
|------------------------------|-----------------------|-------------------------|----------------------------------------------------------------------------------------------------------------------------------------------------------------------------------------------------------------------------------------------------------------------------------------------------------------------------------------------------------|------------------------------------------------------------------------------------------------------------------------------------------------------------|------------------------------|------|
| Germline and somatic (mixed) |                       | Whole-genome sequencing | DNA sequenced with the Illumina HiSeq 2000 Genome Analyser. Reads were aligned to the NCBI GRCh37 human reference genome. The authors performed SNV and indel discovery, genotyping and variant quality score recalibration in all tumor and germline samples simultaneously, according to the GATK HaplotypeCaller v.3.2 best practices recommendations | <i>BRCA2</i> . Germline and somatic variants, including single nucleotide variants, indels and structural variants                                         | Decker <i>et al</i> , 2016   | (43) |
|                              |                       |                         | No details provided                                                                                                                                                                                                                                                                                                                                      | DDR (undefined); <i>BRCA2</i> , <i>BRCA1</i> reported. Germline and somatic variants, including single nucleotide variants, indels and structural variants |                              |      |
| <b>Country not reported</b>  |                       |                         |                                                                                                                                                                                                                                                                                                                                                          |                                                                                                                                                            |                              |      |
| Somatic                      | Tumor biopsy          | NGS                     | 70-gene cfDNA next generation sequencing panel from a CLIA-licensed, CAP-accredited laboratory (Guardant Health, Inc.)                                                                                                                                                                                                                                   | 70 genes including <i>BRCA1</i> , <i>BRCA2</i>                                                                                                             | Sonpavde <i>et al</i> , 2017 | (6)  |
|                              | Circulating tumor DNA |                         |                                                                                                                                                                                                                                                                                                                                                          |                                                                                                                                                            |                              |      |

|  |                                            |                    |                                                                                                                                                                                                                                                                                                                                                                                                      |                        |                              |             |
|--|--------------------------------------------|--------------------|------------------------------------------------------------------------------------------------------------------------------------------------------------------------------------------------------------------------------------------------------------------------------------------------------------------------------------------------------------------------------------------------------|------------------------|------------------------------|-------------|
|  | Formalin-fixed and paraffin embedded tumor | Capture sequencing | Comprehensive genomic profiling was performed on hybridization captured, adaptor ligation-based libraries to a mean coverage depth of 583X for up to 315 cancer related genes plus 37 introns from 14 genes frequently rearranged in cancer. Clinically relevant GA (CRGA) were defined as genomic alterations linked to drugs on the market or under evaluation in mechanism driven clinical trials | Undefined <i>BRCA2</i> | Stephens <i>et al</i> , 2016 | <u>(29)</u> |
|  |                                            | NGS                | NGS using the commercially available Ion Torrent Hotspot Cancer Panel. This test is for gene mutation, not for copy number changes or translocations                                                                                                                                                                                                                                                 | <i>ATM, MLH1</i>       | Liu <i>et al</i> , 2016      | <u>(5)</u>  |

*ATM*, ataxia telangiectasia mutated; *ATR*, ataxia telangiectasia and Rad3-related protein; *BAP1*, *BRCA1*-associated protein 1; *BARD1*, *BRCA1*-associated RING domain 1; *BLM*, Bloom syndrome RecQ like helicase; *BRCA*, breast cancer susceptibility gene; *BRIP1*, *BRCA1*-interacting protein C-terminal helicase 1; CDK, cyclin-dependent kinase; cfDNA, cell-free DNA; *CHEK2*, checkpoint kinase 2; ctDNA, circulating tumor DNA; CYP, cytochrome P450; DDR, DNA damage repair; dsDNA, double-stranded DNA; *ERCC2*, excision repair cross-complementation group 2; ESR, estrogen receptor 1; *FAM175A*, family with sequence similarity 175, member A; *FANCA*, Fanconi anemia complementation group A; FFPE, formalin-fixed paraffin-embedded; FISH, fluorescent in situ hybridization; gDNA, genomic DNA; *GEN1*, GEN1, Holliday junction 5' flap endonuclease; IHC, immunohistochemistry; *LIG4*, DNA ligase 4; LOH, loss of heterozygosity; MGPT, multi-gene panel test; *MLH1*, mutL homolog 1; MLPA, multiplex ligation-dependent probe amplification; MMR, mismatch repair; *MRE11A*, *MRE11* homolog A, double-strand break repair nuclease; MSH, muS homolog; *MUTYH*, mutY DNA glycosylase; *NBN*, nibrin; NCBI, National Center for Biotechnology Information; NGS, next-generation sequencing; NR, not reported; *NR3C1*, nuclear receptor subfamily 3 group c member 1; *PALB2*, partner and localizer of *BRCA2*; PC, prostate cancer; PCR, polymerase chain reaction; *PMS2*, *PMS1* homolog 2, mismatch repair system component; *PPP2R2A*, protein phosphatase 2 regulatory subunit B alpha; RAD, DNA repair protein; *RBI*, RB transcriptional corepressor 1; RFLP, restriction fragment length polymorphism; RING, really interesting new gene; SNP, single nucleotide polymorphism; *TGFBI*, transforming growth factor beta 1; *TSHR*, thyroid stimulating hormone receptor; UKGPCS, UK genetic prostate cancer study; WES, whole-exome sequencing; *WRN*, Werner syndrome RecQ like helicase; *XPF*, xeroderma pigmentosum complementation group F; XRCC, x-ray repair cross complementing

**Appendix S7. Summary of risk of bias (Joanna Briggs Institute [JBI] Critical Appraisal Checklist).**

| Author, year                    | Publication type | Was the sample representative of the target population? | Were study participants recruited in an appropriate way? | Was the sample size adequate? | Were the study subjects and setting described in detail? | Is the data analysis conducted with sufficient coverage? | Were objective, standard criteria used for measurement of PC? <sup>a</sup> | Was the condition measured reliably? <sup>b</sup> | Was there appropriate statistical analysis? | Are all important confounding factors accounted for? | Were subpopulations identified using objective criteria? | References |
|---------------------------------|------------------|---------------------------------------------------------|----------------------------------------------------------|-------------------------------|----------------------------------------------------------|----------------------------------------------------------|----------------------------------------------------------------------------|---------------------------------------------------|---------------------------------------------|------------------------------------------------------|----------------------------------------------------------|------------|
| Abida <i>et al</i> , 2017       | Full paper       | No                                                      | Unclear                                                  | Yes                           | Yes                                                      | Yes                                                      | Yes                                                                        | Yes                                               | Yes                                         | Yes                                                  | NA                                                       | (30)       |
| Agalliu <i>et al</i> , 2007     | Full paper       | Unclear                                                 | Unclear                                                  | Yes                           | Yes                                                      | Yes                                                      | Yes                                                                        | Unclear                                           | Yes                                         | Unclear                                              | NA                                                       | (31)       |
| Agalliu <i>et al</i> , 2009     | Full paper       | Yes                                                     | Yes                                                      | Yes                           | Yes                                                      | Yes                                                      | Unclear                                                                    | Unclear                                           | Yes                                         | Yes                                                  | Unclear                                                  | (32)       |
| Akbari <i>et al</i> , 2014      | Full paper       | No                                                      | Yes                                                      | Yes                           | No                                                       | Yes                                                      | Unclear                                                                    | Unclear                                           | Yes                                         | Unclear                                              | NA                                                       | (103)      |
| Angele <i>et al</i> , 2004      | Full paper       | No                                                      | Yes                                                      | Yes                           | No                                                       | Yes                                                      | Unclear                                                                    | Unclear                                           | Yes                                         | Unclear                                              | NA                                                       | (13)       |
| Antonarakis <i>et al</i> , 2018 | Full paper       | Unclear                                                 | Unclear                                                  | Yes                           | Unclear                                                  | Yes                                                      | Yes                                                                        | Unclear                                           | Yes                                         | Yes                                                  | Yes                                                      | (34)       |
| Beltran <i>et al</i> , 2013     | Full paper       | No                                                      | Unclear                                                  | No                            | No                                                       | Yes                                                      | Unclear                                                                    | Unclear                                           | No                                          | Yes                                                  | NA                                                       | (22)       |
| Beltran <i>et al</i> , 2015     | Full paper       | No                                                      | Unclear                                                  | Yes                           | No                                                       | Yes                                                      | Unclear                                                                    | Unclear                                           | Yes                                         | Unclear                                              | NA                                                       | (19)       |
| Browning <i>et al</i> , 2006    | Full paper       | No                                                      | Unclear                                                  | Yes                           | Yes                                                      | Yes                                                      | Yes                                                                        | Yes                                               | Yes                                         | Yes                                                  | NA                                                       | (14)       |

|                               |            |         |         |     |         |         |         |         |         |         |         |       |
|-------------------------------|------------|---------|---------|-----|---------|---------|---------|---------|---------|---------|---------|-------|
| Cancer Genome Atlas 2015      | Full paper | Yes     | Unclear | Yes | Yes     | Yes     | Yes     | Unclear | Yes     | Unclear | NA      | (37)  |
| Castro <i>et al</i> , 2011    | Abstract   | Yes     | Yes     | Yes | No      | Yes     | Unclear | Unclear | Yes     | Unclear | NA      | (38)  |
| Cesaretti <i>et al</i> , 2007 | Full paper | No      | Unclear | Yes | Yes     | Yes     | Yes     | Yes     | Yes     | Unclear | Yes     | (41)  |
| Cheng <i>et al</i> , 2011     | Abstract   | Unclear | Yes     | Yes | No      | Yes     | Unclear | Unclear | Yes     | Unclear | Unclear | (23)  |
| Dall'Era <i>et al</i> , 2017  | Abstract   | Unclear | Unclear | Yes | No      | Yes     | Unclear | Unclear | No      | Unclear | Yes     | (8)   |
| Damaraju <i>et al</i> , 2006  | Full paper | No      | Unclear | Yes | Yes     | Yes     | Yes     | Unclear | Yes     | Yes     | Yes     | (26)  |
| Daniel <i>et al</i> , 2017    | Abstract   | Unclear | Unclear | Yes | No      | Yes     | Unclear | Unclear | Yes     | Unclear | NA      | (9)   |
| Dawson <i>et al</i> , 2016    | Abstract   | Unclear | Unclear | Yes | No      | Yes     | Unclear | Unclear | Unclear | Unclear | NA      | (11)  |
| Decker <i>et al</i> , 2016    | Full paper | Yes     | Unclear | No  | Unclear | Yes     | Unclear | Unclear | Yes     | Unclear | NA      | (43)  |
| Edwards <i>et al</i> , 2003   | Full paper | Yes     | Yes     | Yes | No      | Yes     | Unclear | Unclear | Yes     | Yes     | NA      | (105) |
| Evans <i>et al</i> , 2016     | Full paper | Yes     | Unclear | Yes | No      | Yes     | Yes     | Unclear | No      | Yes     | NA      | (45)  |
| Feldman <i>et al</i> , 2014   | Abstract   | Unclear | Unclear | Yes | No      | Unclear | Unclear | Unclear | No      | Unclear | NA      | (10)  |
| Fontugne <i>et al</i> , 2015  | Abstract   | Unclear | Unclear | Yes | No      | Yes     | Unclear | Unclear | No      | Unclear | NA      | (47)  |



|                               |            |         |         |     |     |         |         |         |         |         |         |       |
|-------------------------------|------------|---------|---------|-----|-----|---------|---------|---------|---------|---------|---------|-------|
| Gallagher <i>et al</i> , 2012 | Full paper | No      | Yes     | Yes | Yes | Yes     | Unclear | Unclear | Yes     | Yes     | Unclear | (48)  |
| Gambhira <i>et al</i> , 2016  | Abstract   | Unclear | Unclear | No  | No  | Yes     | Unclear | Unclear | Yes     | Unclear | NA      | (17)  |
| Gayther <i>et al</i> , 2000   | Full paper | Unclear | Unclear | No  | No  | No      | Unclear | Unclear | Yes     | Unclear | Yes     | (50)  |
| Giusti <i>et al</i> , 2003    | Full paper | Yes     | Yes     | Yes | No  | Yes     | Unclear | Yes     | Yes     | Unclear | Yes     | (51)  |
| Gourdin <i>et al</i> , 2016   | Abstract   | Unclear | Unclear | Yes | No  | Yes     | Unclear | Unclear | Unclear | Unclear | NA      | (52)  |
| Grasso <i>et al</i> , 2012    | Full paper | Unclear | Unclear | No  | Yes | Yes     | Unclear | Yes     | Yes     | Unclear | NA      | (53)  |
| Hamel <i>et al</i> , 2003     | Full paper | No      | No      | Yes | No  | Yes     | Unclear | Unclear | Yes     | Unclear | Yes     | (55)  |
| Hart <i>et al</i> , 2016      | Full paper | Yes     | Unclear | Yes | Yes | Yes     | Unclear | Unclear | Yes     | Yes     | Yes     | (56)  |
| Hayano <i>et al</i> , 2016    | Full paper | Unclear | Unclear | Yes | No  | Yes     | Unclear | Unclear | No      | Unclear | Yes     | (57)  |
| Hebbring <i>et al</i> , 2006  | Full paper | Yes     | Unclear | Yes | No  | Yes     | Unclear | Unclear | Yes     | Unclear | Unclear | (58)  |
| Hubert <i>et al</i> , 1999    | Letter     | No      | Unclear | Yes | No  | Yes     | Yes     | Unclear | Yes     | Yes     | No      | (59)  |
| Jefferies <i>et al</i> , 2017 | Abstract   | No      | Unclear | Yes | No  | Unclear | Unclear | Unclear | Yes     | Unclear | NA      |       |
| Kirchoff <i>et al</i> , 2004  | Full paper | No      | Unclear | Yes | No  | No      | Unclear | Unclear | Yes     | Yes     | Unclear | (63)  |
| Kote-Jarai                    | Full paper | Yes     | Yes     | Yes | No  | Yes     | Unclear | Unclear | Yes     | Yes     | NA      | (104) |

|                                   |            |         |         |         |     |         |         |         |         |         |         |      |
|-----------------------------------|------------|---------|---------|---------|-----|---------|---------|---------|---------|---------|---------|------|
| <i>et al, 2011</i>                |            |         |         |         |     |         |         |         |         |         |         |      |
| LaDuca <i>et al, 2017</i>         | Abstract   | Unclear | Unclear | Unclear | No  | Unclear | Unclear | Unclear | No      | Unclear | No      | (65) |
| Lara <i>et al, 2017</i>           | Abstract   | Unclear | Unclear | Yes     | No  | Yes     | Unclear | Unclear | Yes     | Unclear | NA      | (66) |
| Ledet <i>et al, 2017</i>          | Abstract   | No      | Yes     | Yes     | No  | Yes     | Unclear | Unclear | Unclear | Unclear | Yes     | (67) |
| Lehrer <i>et al, 1998</i>         | Full paper | No      | Unclear | Yes     | No  | Yes     | Unclear | Unclear | Yes     | Yes     | Unclear | (68) |
| Leongamornlert <i>et al, 2012</i> | Full paper | Yes     | Unclear | Yes     | No  | Unclear | Unclear | Unclear | Yes     | Unclear | NA      | (69) |
| Leongamornlert <i>et al, 2014</i> | Full paper | Yes     | Unclear | Yes     | Yes | Yes     | Yes     | Unclear | Yes     | Yes     | Yes     | (70) |
| Liu <i>et al, 2016</i>            | Abstract   | Unclear | Unclear | No      | No  | Yes     | Unclear | Unclear | Unclear | Unclear | NA      | (5)  |
| Lu <i>et al, 2015</i>             | Full paper | Yes     | Unclear | Yes     | No  | Yes     | Unclear | Unclear | No      | Unclear | NA      | (71) |
| Maier <i>et al, 2014</i>          | Full paper | No      | Unclear | Yes     | Yes | Yes     | Yes     | Unclear | Yes     | Yes     | Unclear | (72) |
| Manson-Bahr <i>et al, 2015</i>    | Full paper | Unclear | Unclear | Yes     | Yes | Yes     | Unclear | Unclear | Unclear | Unclear | NA      | (73) |
| Marshall <i>et al, 2017</i>       | Abstract   | Unclear | Unclear | Yes     | No  | Unclear | Yes     | Unclear | Yes     | Unclear | Yes     | (74) |
| Meyer <i>et al,</i>               | Full paper | No      | Yes     | Yes     | Yes | Yes     | Yes     | Yes     | Yes     | Yes     | Yes     | (25) |

|                                  |            |         |         |         |         |         |         |         |         |         |         |       |
|----------------------------------|------------|---------|---------|---------|---------|---------|---------|---------|---------|---------|---------|-------|
| 2007                             |            |         |         |         |         |         |         |         |         |         |         |       |
| Myers <i>et al</i> , 2016        | Abstract   | Unclear | Unclear | Yes     | No      | Yes     | Unclear | Unclear | Yes     | Unclear | NA      | (76)  |
| Na <i>et al</i> , 2017           | Full paper | Unclear | Unclear | Yes     | No      | Yes     | Yes     | Unclear | Yes     | Yes     | NA      | (106) |
| Nam <i>et al</i> , 2005          | Full paper | No      | Yes     | Yes     | Yes     | Yes     | Unclear | Unclear | Yes     | Yes     | NA      | (15)  |
| Naslund Koch <i>et al</i> , 2016 | Full paper | No      | Yes     | Yes     | No      | Yes     | Unclear | Unclear | Yes     | Unclear | NA      | (16)  |
| Nastiuk <i>et al</i> , 1999      | Full paper | No      | Unclear | Yes     | No      | Unclear | Unclear | Unclear | No      | Unclear | Unclear | (78)  |
| Nelson <i>et al</i> , 2016       | Abstract   | Yes     | Unclear | Yes     | No      | Yes     | Unclear | Unclear | Yes     | Unclear | NA      | (79)  |
| Nicolas <i>et al</i> , 2015      | Full paper | No      | Unclear | No      | No      | Yes     | Yes     | Unclear | Yes     | Unclear | Yes     | (24)  |
| Nicolosi <i>et al</i> , 2017     | Abstract   | Unclear | Unclear | Yes     | No      | Unclear | Unclear | Unclear | Unclear | Unclear | NA      | (81)  |
| Nientiedt <i>et al</i> , 2017    | Full paper | No      | Unclear | Unclear | Yes     | Unclear | Yes     | Unclear | Yes     | Unclear | Unclear | (82)  |
| Palapattu <i>et al</i> , 2015    | Abstract   | Unclear | Unclear | No      | No      | Yes     | Unclear | Unclear | Yes     | Unclear | NA      | (20)  |
| Patel <i>et al</i> , 2016        | Abstract   | No      | Unclear | Yes     | No      | Yes     | Unclear | Unclear | Yes     | Unclear | NA      | (83)  |
| Petrovics <i>et al</i> , 2016    | Abstract   | Unclear | Unclear | Yes     | Unclear | Yes     | Unclear | Unclear | Yes     | Unclear | NA      | (84)  |
| Pomerantz                        | Full paper | No      | Yes     | Yes     | Yes     | Yes     | Unclear | Unclear | Yes     | Yes     | Yes     | 2017  |

|                                |            |         |         |     |     |         |         |         |         |         |    |      |
|--------------------------------|------------|---------|---------|-----|-----|---------|---------|---------|---------|---------|----|------|
| <i>et al, 2017</i>             |            |         |         |     |     |         |         |         |         |         |    | (85) |
| Pritchard <i>et al, 2014</i>   | Full paper | Unclear | Unclear | Yes | No  | Yes     | Unclear | Unclear | Yes     | NA      | NA | (86) |
| Pritchard <i>et al, 2016</i>   | Full paper | Yes     | Unclear | Yes | Yes | Yes     | Yes     | Unclear | Yes     | Yes     | NA | (87) |
| Robbins <i>et al, 2011</i>     | Full paper | Unclear | Unclear | No  | No  | Yes     | Unclear | Unclear | Yes     | Unclear | NA | (21) |
| Robinson <i>et al, 2015</i>    | Full paper | Yes     | Unclear | Yes | No  | Yes     | Unclear | Unclear | Unclear | Unclear | NA | (89) |
| Romero <i>et al, 2017</i>      | Abstract   | Yes     | Unclear | Yes | No  | Yes     | Unclear | Unclear | Yes     | Unclear | NA | (90) |
| Schweizer <i>et al, 2016</i>   | Full paper | No      | Yes     | No  | No  | Yes     | Yes     | Yes     | Yes     | Unclear | NA | (27) |
| Sonpavde <i>et al, 2017</i>    | Abstract   | Unclear | Unclear | Yes | No  | Yes     | Unclear | Unclear | Yes     | Unclear | NA | (6)  |
| Stephens <i>et al, 2016</i>    | Abstract   | Unclear | Unclear | No  | No  | Yes     | Unclear | Unclear | No      | Unclear | NA | (29) |
| Struss <i>et al, 2017</i>      | Abstract   | Unclear | Unclear | Yes | No  | Unclear | Unclear | Unclear | Yes     | Unclear | NA | (95) |
| Tanaka <i>et al, 2009</i>      | Full paper | No      | Unclear | Yes | No  | No      | Yes     | Unclear | Yes     | Unclear | NA | (7)  |
| Timms <i>et al, 2016</i>       | Poster     | Unclear | Unclear | Yes | No  | Unclear | Unclear | Unclear | Unclear | Unclear | NA | (96) |
| Tischkowitz <i>et al, 2008</i> | Full paper | No      | Unclear | Yes | No  | Yes     | Unclear | Unclear | Yes     | Unclear | No | (97) |
| Uchida <i>et al, 1999</i>      | Full paper | Unclear | Unclear | No  | No  | Yes     | Yes     | Unclear | Yes     | Unclear | NA | (12) |

|                              |            |         |         |     |     |     |         |         |         |         |         |       |
|------------------------------|------------|---------|---------|-----|-----|-----|---------|---------|---------|---------|---------|-------|
| Vazina <i>et al</i> , 2000   | Full paper | No      | Yes     | Yes | No  | Yes | Unclear | Unclear | Yes     | Unclear | No      | (98)  |
| Williams <i>et al</i> , 1996 | Full paper | Unclear | Unclear | No  | No  | Yes | Unclear | Unclear | Unclear | Unclear | NA      | (99)  |
| Wu <i>et al</i> , 2006       | Full paper | No      | Yes     | Yes | No  | Yes | Unclear | Unclear | Yes     | Unclear | NA      | (100) |
| Xia <i>et al</i> , 2015      | Full paper | Unclear | Yes     | No  | Yes | Yes | Yes     | Unclear | No      | Yes     | NA      | (18)  |
| Zhu <i>et al</i> , 2010      | Abstract   | Unclear | Unclear | No  | No  | Yes | Unclear | Unclear | No      | Unclear | Unclear | (101) |
| Zuhlke <i>et al</i> , 2012   | Full paper | Unclear | Unclear | Yes | No  | Yes | Unclear | Unclear | Yes     | Unclear | Yes     | (102) |

NA, not applicable. <sup>a</sup>Was the diagnostic criterion clearly reported? <sup>b</sup>Who performed the diagnosis and were all samples diagnosed in the same way?



**Appendix S8. Summary of DDR gene mutation prevalence in germline tissue.**

| % period prevalence, median (range) | General prostate cancer (PC)          | Metastatic prostate cancer (mPC)      | Metastatic castration-resistant prostate cancer (mCRPC) | Castration-resistant prostate cancer (CRPC) |
|-------------------------------------|---------------------------------------|---------------------------------------|---------------------------------------------------------|---------------------------------------------|
| <i>ATM</i>                          | 1.5 (0.41, 3.4)<br>4 studies (n=1384) | 1.7 (1.59, 1.8)<br>2 studies (n=1261) | 1.91 (NA)<br>1 study (n=419)                            | NR                                          |
| <i>ATR</i>                          | 0 (NA)<br>1 study (n=499)             | 0.3 (0.3, 0.3)<br>2 studies (n=1261)  | NR                                                      | NR                                          |
| <i>BRCA1</i>                        | 0.6 (0.2, 1.0)<br>7 studies (n=4784)  | 0.9 (0.9, 0.9)<br>2 studies (n=1261)  | 0.8 (0.7, 1.0)<br>2 studies (n=569)                     | NR                                          |
| <i>BRCA2</i>                        | 1.1 (0.0, 0.9)<br>8 studies (n=5894)  | 5.2 (5.1, 5.4)<br>2 studies (n=1261)  | 5.0 (3.3, 5.3)<br>3 studies (n=888)                     | NR                                          |
| <i>CHEK2</i>                        | 1.8 (0.4, 10.7)<br>5 studies (n=1769) | 1.5 (1.2, 1.9)<br>2 studies (n=1103)  | 1.0 (NA)<br>1 study (n=419)                             | NR                                          |
| <i>FANCA</i>                        | 0.56 (NA)<br>1 study (n=178)          | NR                                    | NR                                                      | NR                                          |
| <i>MLH1</i>                         | 0.0 (NA)<br>1 study (n=499)           | 0.0 (NA)<br>1 study (n=692)           | NR                                                      | NR                                          |
| <i>MRE11A</i>                       | 0.2 (NA)<br>1 study (n=499)           | 0.2 (0.1, 0.2)<br>2 studies (n=1261)  | NR                                                      | NR                                          |
| <i>NBN</i>                          | 0.3 (0.2, 0.5)<br>2 studies (n=720)   | 0.2 (0.2, 0.3)<br>2 studies (n=1261)  | NR                                                      | NR                                          |
| <i>PALB2</i>                        | 0.5 (0.4, 0.6)<br>3 studies (n=898)   | 0.5 (0.4, 0.5)<br>2 studies (n=1261)  | 0.6 (NA)<br>1 study (n=319)                             | NR                                          |
| <i>RAD51C</i>                       | 0.5 (0.4, 0.6)<br>2 studies (n=677)   | 0.2 (0.1, 0.2)<br>2 studies (n=1261)  | NR                                                      | NR                                          |
| DDR <sup>a</sup>                    | 18.6 (17.2, 19)                       | 11.6 (11.4, 11.8)                     | 8.3 (7.5, 9.1)                                          | NR                                          |

|                                                                                                                                                                                                                                                                                                                                                                                                                                                                                                                                                                                                                                                                                                                                                                                  |                    |                    |                   |  |
|----------------------------------------------------------------------------------------------------------------------------------------------------------------------------------------------------------------------------------------------------------------------------------------------------------------------------------------------------------------------------------------------------------------------------------------------------------------------------------------------------------------------------------------------------------------------------------------------------------------------------------------------------------------------------------------------------------------------------------------------------------------------------------|--------------------|--------------------|-------------------|--|
|                                                                                                                                                                                                                                                                                                                                                                                                                                                                                                                                                                                                                                                                                                                                                                                  | 3 studies (n=1712) | 2 studies (n=1261) | 2 studies (n=738) |  |
| <sup>a</sup> DDR=multiple gene definitions for DNA damage response gene that includes at least one of our genes of interest. <i>ATM</i> , ataxia telangiectasia mutated; <i>ATR</i> , ataxia telangiectasia and Rad3-related protein; <i>BRCA</i> , breast cancer susceptibility gene; <i>CHEK2</i> , checkpoint kinase 2; DDR, DNA damage repair; <i>FANCA</i> , Faconi anemia complementation group A; <i>MLH1</i> , MutL homolog 1; <i>MRE11A</i> , <i>MRE11</i> homolog A, double-strand break repair nuclease; n, sample size; NA, not applicable; <i>NBN</i> , nibrin; NR, not reported; <i>PALB2</i> , partner and localizer of <i>BRCA2</i> ; <i>RAD51C</i> , <i>RAD51</i> paralog C. Original study data can be found in “Mutations in <i>ATM</i> gene” in Appendix S7. |                    |                    |                   |  |

### Summary of DDR gene mutation prevalence in somatic tissue

| % period prevalence, median (range) | General prostate cancer (PC)                                     | Metastatic prostate cancer (mPC) | Metastatic castration-resistant prostate cancer (mCRPC) | Castration-resistant prostate cancer (CRPC) |
|-------------------------------------|------------------------------------------------------------------|----------------------------------|---------------------------------------------------------|---------------------------------------------|
| <i>ATM</i>                          | 3.9 (2.4, 8.0)<br>7 studies (n=2066)                             | 4 (NA)<br>1 study (n=70)         | 6 (0.0, 12.0)<br>2 studies (n=203)                      | NR                                          |
| <i>ATR</i>                          | 0.6 (0.0, 1.2)<br>2 studies (n=714)                              | NR                               | NR                                                      | NR                                          |
| <i>BRCA1</i>                        | 1.1 (0.6, 2.4)<br>5 studies (n=2487);<br>6 datasets <sup>a</sup> | NR                               | 2.8 (0.7, 5.0)<br>2 studies (n=664)                     | NR                                          |
| <i>BRCA2</i>                        | 4.9 (0, 11.8)<br>9 studies (n=3266);<br>10 datasets <sup>a</sup> | NR                               | 5.0 (2.0, 6.0)<br>3 studies (n=714)                     | NR                                          |
| <i>CHEK2</i>                        | 1.2 (0.8, 2.4)<br>3 studies (n=798)                              | NR                               | NR                                                      | NR                                          |
| <i>FANCA</i>                        | 2.1 (0.5, 16.0)<br>4 studies (n=1234)                            | NR                               | NR                                                      | NR                                          |



|                  |                                                                 |                                      |                             |    |
|------------------|-----------------------------------------------------------------|--------------------------------------|-----------------------------|----|
| <i>MLH1</i>      | 0.6 (0.2, 1.0)<br>2 studies (n=1081)                            | 3.3 (NA)<br>1 study (n=60)           | NR                          | NR |
| <i>MRE11A</i>    | 0.0 (NA)<br>1 study (n=630)                                     | NR                                   | NR                          | NR |
| <i>NBN</i>       | 1.2 (0.3, 65)<br>3 studies (n=783)                              | NR                                   | NR                          | NR |
| <i>PALB2</i>     | 1.3 (0.6, 2.0)<br>2 studies (n=1081)                            | 0.0 (NA)<br>1 study (n=70)           | 4.0 (NA)<br>1 study (n=153) | NR |
| <i>RAD51C</i>    | 1.5 (0.0, 3.0)<br>2 studies (n=963)                             | NR                                   | NR                          | NR |
| DDR <sup>b</sup> | 10.7 (4.9, 22)<br>3 studies (n=680);<br>4 datasets <sup>c</sup> | 13.2 (10, 16.4)<br>2 studies (n=105) | NR                          | NR |

<sup>a</sup>One study provided 2 data sets, and both were included; <sup>b</sup>DDR=multiple gene definitions for DNA damage response gene that includes at least 1 of our genes of interest; <sup>c</sup>one study provided two definitions, and both were included. *ATM*, ataxia telangiectasia mutated; *ATR*, ataxia telangiectasia and Rad3-related protein; *BRCA*, breast cancer susceptibility gene; *CHEK2*, checkpoint kinase 2; DDR, DNA damage repair; *FANCA*, Faconi anemia complementation group A; *MLH1*, MutL homolog 1; *MRE11A*, *MRE11* homolog A, double-strand break repair nuclease; n, sample size; NA, not applicable; *NBN*, nibrin; NR, not reported; *PALB2*, partner and localizer of *BRCA2*; *RAD51C*, *RAD51* paralog C. Original study data can be found in Mutations in *ATM* gene in Appendix S7.

**Summary of DDR gene mutation prevalence in unselected populations.**

**(A) Mutations in the *ATM* gene.**

| PC group | Germline or somatic | % prevalence | N   | DDR definition                           | Country        | Study level inclusion criteria <sup>a</sup>                                                                                                                                                                                                                                                                                                                                     | Baseline Gleason score (% of population)                      | Author, year                  | References |
|----------|---------------------|--------------|-----|------------------------------------------|----------------|---------------------------------------------------------------------------------------------------------------------------------------------------------------------------------------------------------------------------------------------------------------------------------------------------------------------------------------------------------------------------------|---------------------------------------------------------------|-------------------------------|------------|
| mCRPC    | Germline            | 1.91         | 419 | Undefined                                | Spain          | Patients ≥18 years of age; histologically confirmed prostate cancer; presence of metastatic disease according to bone, CT, and/or MRI scan; confirmed castration-resistant prostate cancer; due to start or have started first-line treatment with any approved survival-prolonging therapy for mCRPC within a period of 6 months from study entry; ECOG performance status ≤21 | NR                                                            | Romero <i>et al</i> , 2017    | (90)       |
|          | Somatic             | 0            | 50  | <i>ATM</i> non-synonymous point mutation | USA            | Lethal heavily pre-treated CRPCs obtained at rapid autopsy; or high-grade localized prostate cancers                                                                                                                                                                                                                                                                            | NR                                                            | Grasso <i>et al</i> , 2012    | (53)       |
|          |                     | 12           | 153 | <i>ATM</i> mut/del                       | USA            | PC patients consenting to genomic analysis of their tumor and germline DNA                                                                                                                                                                                                                                                                                                      | NR                                                            | Abida <i>et al</i> , 2017     | (30)       |
| mPC      | Germline            | 1.59         | 692 | <i>ATM</i>                               | Multi-national | Diagnosis of metastatic prostate cancer, as determined by histologic evaluation of a tumor biopsy specimen or surgical resection specimen                                                                                                                                                                                                                                       | ≤6 (6.07); 3+4 (9.4); 4+3 (13.3); 8-10 (55.2); unknown (16.0) | Pritchard <i>et al</i> , 2016 | (87)       |
|          |                     | 1.8          | 569 | <i>ATM</i> (undefined)                   | Multi-national | Men had to have mPC based on a biopsy of a metastatic site                                                                                                                                                                                                                                                                                                                      | NR                                                            | Nelson <i>et al</i> , 2016    | (79)       |
|          | Somatic             | 4            | 70  | <i>ATM</i> mut/del                       | USA            | PC patients consenting to genomic analysis of their tumor and germline DNA                                                                                                                                                                                                                                                                                                      | NR                                                            | Abida <i>et al</i> , 2017     | (30)       |
| PC       | Germline            | 2            | 221 | <i>ATM</i> undefined                     | USA            |                                                                                                                                                                                                                                                                                                                                                                                 | NR                                                            | Abida <i>et al</i> , 2017     | (30)       |

|    |         |      |     |                                                  |                |                                                                                                                                                                                         |                                                            |                                 |       |
|----|---------|------|-----|--------------------------------------------------|----------------|-----------------------------------------------------------------------------------------------------------------------------------------------------------------------------------------|------------------------------------------------------------|---------------------------------|-------|
|    |         | 3.4  | 178 | <i>ATM</i> truncations                           | Multi-national | Patients with prostate adenocarcinoma and sequence data from germline and tumor DNA; 50% coverage of the targeted exome having at least 20x coverage in both germline and tumor samples | NR                                                         | Lu <i>et al</i> , 2015          | (71)  |
|    |         | 0.41 | 486 | <i>ATM</i>                                       | Multi-national | NR                                                                                                                                                                                      | NR                                                         | Na <i>et al</i> , 2017          | (106) |
|    |         | 1.00 | 499 | <i>ATM</i>                                       | Multi-national | Diagnosis of metastatic prostate cancer, as determined by histologic evaluation of a tumor biopsy specimen or surgical resection specimen                                               | ≤6 (9.0); 3+4 (29.7); 4+3 (20.2); 8-10 (41.1); unknown (0) | Pritchard <i>et al</i> , 2016   | (87)  |
| PC | Somatic | 2.38 | 84  | Defective <i>ATM</i> genes (one affected allele) | Multi-national | Selection of PC patients from a commercial biobank and the Transatlantic Prostate Group Cohort                                                                                          | NR                                                         | Timms <i>et al</i> , 2016       | (96)  |
|    |         | 3    | 630 | Mutation frequency from DNA_REPAIR gene set      | USA            | Tumor samples were from 4 published retrospective prostatectomy patient cohorts at the Mayo Clinic (MCI and MCII), Cleveland Clinic (CC), and Thomas Jefferson University (TJU)         | NR                                                         | Evans <i>et al</i> , 2016       | (45)  |
|    |         | 3.17 | 63  | Undefined                                        | UK             | Patients diagnosed with PC, whose biopsy contained >5% of cancer                                                                                                                        | 6 (13); 7 (60); 8 (13); 9 (14)                             | Manson-Bahr <i>et al</i> , 2019 | (73)  |
|    |         | 3.90 | 333 | Truncating and missense mutations                | Multi-national | Patients diagnosed with prostate adenocarcinoma, and had not received prior treatment for their disease (chemotherapy, radiotherapy, or hormonal ablation therapy)                      | 3+3 (19.5); 3+4 (30.6); 4+3 (23.4); ≥8 (26.4)              | Cancer Genome Atlas 2015        | (37)  |
|    |         | 5    | 451 | <i>ATM</i> undefined                             | USA            | PC patients consenting to genomic analysis of their tumor and germline DNA                                                                                                              | 6 (5.5); 7 (31.0); 8-10 (57.2); unknown (6.2)              | Abida <i>et al</i> , 2017       | (30)  |
|    |         | 5.62 | 178 | <i>ATM</i> somatic mutation                      | Multi-national | Patients with prostate adenocarcinoma and sequence data from germline and tumor                                                                                                         | NR                                                         | Lu <i>et al</i> , 2015          | (71)  |

|  |  |   |     |            |     |                                                                                                                                            |    |                           |      |
|--|--|---|-----|------------|-----|--------------------------------------------------------------------------------------------------------------------------------------------|----|---------------------------|------|
|  |  |   |     |            |     | DNA; 50% coverage of the targeted exome having at least 20x coverage in both germline and tumor samples                                    |    |                           |      |
|  |  | 8 | 327 | <i>ATM</i> | USA | Men with prostate cancer who had undergone treatment at the Dana Farber Cancer Institute; consented to targeted next generation sequencing | NR | Patel <i>et al</i> , 2016 | (83) |

<sup>a</sup>Study level inclusion criteria may not reflect prostate subgroups because multiple groups are included. *ATM*, ataxia telangiectasia mutated; CRPC, castration-resistant PC; CT, computed tomography; DDR, DNA damage repair; ECOG, Eastern Cooperative Oncology Group; m, metastatic; MRI, magnetic resonance imaging; NR, not reported; PC, prostate cancer. More baseline details can be found in Appendix S5.

### (B) Mutations in the *ATR* gene.

| PC group | Germline or somatic | % prevalence | N   | DDR definition                                     | Country        | Study level inclusion criteria <sup>a</sup>                                                                                                                                     | Baseline Gleason score (% of population)                      | Author, yr                    | Reference |
|----------|---------------------|--------------|-----|----------------------------------------------------|----------------|---------------------------------------------------------------------------------------------------------------------------------------------------------------------------------|---------------------------------------------------------------|-------------------------------|-----------|
| mPC      | Germline            | 0.29         | 692 | <i>ATR</i>                                         | Multi-national | Diagnosis of metastatic prostate cancer, as determined by histologic evaluation of a tumor biopsy specimen or surgical resection specimen                                       | ≤6 (6.07); 3+4 (9.4); 4+3 (13.3); 8-10 (55.2); unknown (16.0) | Pritchard <i>et al</i> , 2016 | (87)      |
|          |                     | 0.3          | 569 | <i>ATR</i> (undefined)                             | Multi-national | Men had to have mPC based on a biopsy of a metastatic site                                                                                                                      | NR                                                            | Nelson <i>et al</i> , 2016    | (79)      |
| PC       | Somatic             | 0            | 630 | Gene frequency from DNA_REPAIR gene set            | USA            | Tumor samples were from 4 published retrospective prostatectomy patient cohorts at the Mayo Clinic (MCI and MCII), Cleveland Clinic (CC), and Thomas Jefferson University (TJU) | NR                                                            | Evans <i>et al</i> , 2016     | (45)      |
|          |                     | 1.19         | 84  | Defective <i>ATR</i> genes (both alleles affected) | Multi-national | Selection of PC patients from a commercial biobank and the Transatlantic Prostate Group Cohort                                                                                  | NR                                                            | Timms <i>et al</i> , 2016     | (96)      |
| PC       | Germline            | 0            | 499 | <i>ATR</i>                                         | Multi-national | Diagnosis of metastatic prostate cancer, as determined by histologic evaluation of a tumor biopsy specimen or surgical                                                          | ≤6 (9.0); 3+4 (29.7); 4+3 (20.2);                             | Pritchard <i>et al</i> , 2016 | (87)      |

|                                                                                                                                                                                                                                                                                                                                                     |  |  |  |  |  |                    |                             |  |  |
|-----------------------------------------------------------------------------------------------------------------------------------------------------------------------------------------------------------------------------------------------------------------------------------------------------------------------------------------------------|--|--|--|--|--|--------------------|-----------------------------|--|--|
|                                                                                                                                                                                                                                                                                                                                                     |  |  |  |  |  | resection specimen | 8-10 (41.1);<br>unknown (0) |  |  |
| <p><sup>a</sup>Study level inclusion criteria may not reflect prostate subgroups because multiple groups are included. <i>ATR</i>, ataxia telangiectasia and Rad3-related protein; <i>DDR</i>, DNA damage repair; <i>m</i>, metastatic; <i>NR</i>, not reported; <i>PC</i>, prostate cancer. More baseline details can be found in Appendix S5.</p> |  |  |  |  |  |                    |                             |  |  |

**(C) Mutations in the *BRCA1* gene.**

| PC group | Germline or somatic | % prevalence | N   | DDR definition | Country        | Study level inclusion criteria <sup>a</sup>                                                                                                                                                                                                                                                                                                                                    | Baseline Gleason score (% of population) | Author, year               | References |
|----------|---------------------|--------------|-----|----------------|----------------|--------------------------------------------------------------------------------------------------------------------------------------------------------------------------------------------------------------------------------------------------------------------------------------------------------------------------------------------------------------------------------|------------------------------------------|----------------------------|------------|
| mCRPC    | Germline            | 0.66         | 150 | Biallelic loss | Multi-national | Discovery set PC patients were selected based on high Gleason score and availability of both peripheral blood DNA and fresh frozen prostatectomy samples. 150 samples from Robinson 2015 (89)                                                                                                                                                                                  | 7 (10);<br>8 (20);<br>9 (60);<br>10 (10) | Decker <i>et al</i> , 2016 | (43)       |
|          |                     | 0.95         | 419 | Undefined      | Spain          | Patients ≥18years of age; histologically confirmed prostate cancer; presence of metastatic disease according to bone, CT, and/or MRI scan; confirmed castration-resistant prostate cancer; due to start or have started first-line treatment with any approved survival-prolonging therapy for mCRPC within a period of 6 months from study entry; ECOG performance status ≤21 | NR                                       | Romero <i>et al</i> , 2017 | (90)       |
| mCRPC    | Somatic             | 0.66         | 150 | Biallelic loss | Multi-national | Discovery set PC patients were selected based on high Gleason score and availability of both peripheral blood DNA and fresh frozen prostatectomy samples. 150 samples from Robinson 2015 (89)                                                                                                                                                                                  | 7 (10);<br>8 (20);<br>9 (60);<br>10 (10) | Decker <i>et al</i> , 2016 | (43)       |

|     |          |      |      |                                                                                     |                |                                                                                                                                                                                                                             |                                                               |                                    |      |
|-----|----------|------|------|-------------------------------------------------------------------------------------|----------------|-----------------------------------------------------------------------------------------------------------------------------------------------------------------------------------------------------------------------------|---------------------------------------------------------------|------------------------------------|------|
|     |          | 5.00 | 514  | Undefined                                                                           | USA            | Patients with mCRPC that underwent baseline ctDNA analysis for potentially actionable alterations using Guardant360 before new systemic therapy were identified                                                             | NR                                                            | Sonpavde <i>et al</i> , 2017       | (6)  |
| mPC | Germline | 0.87 | 692  | <i>BRCA1</i>                                                                        | Multi-national | Diagnosis of metastatic prostate cancer, as determined by histologic evaluation of a tumor biopsy specimen or surgical resection specimen                                                                                   | ≤6 (6.07); 3+4 (9.4); 4+3 (13.3); 8-10 (55.2); unknown (16.0) | Pritchard <i>et al</i> , 2016      | (87) |
|     |          | 0.90 | 569  | <i>BRCA1</i> (undefined)                                                            | Multi-national | Men had to have mPC based on a biopsy of a metastatic site                                                                                                                                                                  | NR                                                            | Nelson <i>et al</i> , 2016         | (79) |
| PC  | Germline | 0.23 | 2181 | Undefined <i>BRCA1</i>                                                              | UK             | Patients enrolled in the UKGPCS between 1990-2005 with available genomic DNA and clinical and survival data in our prospectively maintained UKGPCS database                                                                 | NR                                                            | Castro <i>et al</i> , 2011         | (38) |
|     |          | 0.45 | 886  | Total <i>BRCA1</i> (4 variants: c.68_69delA G; c.212+1G>T ; c.1954dupA; c.2475delC) | UK             | Patients enrolled in the UKGPCS. Age at diagnosis of ≤65 years (821 cases; age range 36-65 years); and aged >65 years (92 cases; age range 66-88 years) with a family history of one or more first-degree relatives with PC | NR                                                            | Leongamornlert <i>et al</i> , 2012 | (69) |
|     |          | 0.56 | 178  | <i>BRCA1</i> truncation variant                                                     | Multi-national | Patients with prostate adenocarcinoma and sequence data from germline and tumor DNA; 50% coverage of the targeted exome having at least 20x coverage in both germline and tumor samples                                     | NR                                                            | Lu <i>et al</i> , 2015             | (71) |
|     |          | 1.00 | 221  | <i>BRCA1</i> undefined                                                              | USA            | PC patients consenting to genomic analysis of their tumor and germline DNA                                                                                                                                                  | NR                                                            | Abida <i>et al</i> , 2017          | (30) |

|    |         |      |     |                                                       |                |                                                                                                                                                                                          |                                                                        |                               |              |
|----|---------|------|-----|-------------------------------------------------------|----------------|------------------------------------------------------------------------------------------------------------------------------------------------------------------------------------------|------------------------------------------------------------------------|-------------------------------|--------------|
|    |         | 1.00 | 333 | All <i>BRCA1</i> mutation                             | Multi-national | Patients diagnosed with prostate adenocarcinoma, and had not received prior treatment for their disease (chemotherapy, radiotherapy, or hormonal ablation therapy)                       | 3+3 (19.5);<br>3+4 (30.6);<br>4+3 (23.4);<br>≥8 (26.4)                 | Cancer Genome Atlas 2015      | <u>(37)</u>  |
|    |         | 0.41 | 486 | <i>BRCA1</i>                                          | Multi-national | NR                                                                                                                                                                                       | NR                                                                     | Na <i>et al</i> , 2017        | <u>(106)</u> |
|    |         | 0.60 | 499 | <i>BRCA1</i>                                          | Multi-national | Diagnosis of metastatic prostate cancer, as determined by histologic evaluation of a tumor biopsy specimen or surgical resection specimen                                                | ≤6 (9.0);<br>3+4 (29.7);<br>4+3 (20.2);<br>8-10 (41.1);<br>unknown (0) | Pritchard <i>et al</i> , 2016 | <u>(87)</u>  |
| PC | Somatic | 0.56 | 178 | <i>BRCA1</i> somatic mutation                         | Multi-national | Patients with prostate adenocarcinoma and sequence data from germline and tumor DNA; 50% coverage of the targeted exome having at least 20x coverage in both germline and tumor samples. | NR                                                                     | Lu <i>et al</i> , 2015        | <u>(71)</u>  |
|    |         | 0.60 | 630 | Gene frequency from DNA_REPAIR gene set               | USA            | Tumor samples were from 4 published retrospective prostatectomy patient cohorts at the Mayo Clinic (MCI and MCII), Cleveland Clinic (CC), and Thomas Jefferson University (TJU)          | NR                                                                     | Evans <i>et al</i> , 2016     | <u>(45)</u>  |
|    |         | 1.00 | 451 | <i>BRCA1</i> undefined                                | USA            | PC patients consenting to genomic analysis of their tumor and germline DNA                                                                                                               | 6 (5.5);<br>7 (31.0);<br>8-10 (57.2);<br>unknown (6.2)                 | Abida <i>et al</i> , 2017     | <u>(30)</u>  |
|    |         | 1.18 | 936 | Known or likely deleterious mutations in <i>BRCA1</i> | USA            | Men with PC; No other details                                                                                                                                                            | NR                                                                     | Lara <i>et al</i> , 2017      | <u>(66)</u>  |

|                                                                                                                                                                                                                                                                                                                                                                                                                                 |  |      |     |                                                       |     |                                   |    |                           |      |
|---------------------------------------------------------------------------------------------------------------------------------------------------------------------------------------------------------------------------------------------------------------------------------------------------------------------------------------------------------------------------------------------------------------------------------|--|------|-----|-------------------------------------------------------|-----|-----------------------------------|----|---------------------------|------|
|                                                                                                                                                                                                                                                                                                                                                                                                                                 |  | 1.93 | 207 | Known or likely deleterious mutations in <i>BRCA1</i> | USA | Men with PC; No other details     | NR | Lara <i>et al</i> , 2017  | (66) |
|                                                                                                                                                                                                                                                                                                                                                                                                                                 |  | 2.35 | 85  | Undefined                                             | USA | Advanced prostate cancer patients | NR | Myers <i>et al</i> , 2016 | (76) |
| <p><sup>a</sup>Study level inclusion criteria may not reflect prostate subgroups, because multiple groups are included. <i>BRCA</i>, breast cancer susceptibility gene; CRPC, castration-resistant PC; DDR, DNA damage repair; ECOG, Eastern Cooperative Oncology Group; m, metastatic; NR, not reported; PC, prostate cancer; UKGPCS, UK Genetic Prostate Cancer Study. More baseline details can be found in Appendix S5.</p> |  |      |     |                                                       |     |                                   |    |                           |      |

**(D) Mutations in the *BRCA2* gene.**

| PC group | Germline or somatic | % prevalence | N   | DDR definition                 | Country | Study level inclusion criteria <sup>a</sup>                                                                                                                                                                                                                                                                                                                                                | Baseline Gleason score (% of population) | Author, year               | References |
|----------|---------------------|--------------|-----|--------------------------------|---------|--------------------------------------------------------------------------------------------------------------------------------------------------------------------------------------------------------------------------------------------------------------------------------------------------------------------------------------------------------------------------------------------|------------------------------------------|----------------------------|------------|
| mCRPC    | Germline            | 3.34         | 419 | Undefined                      | Spain   | Patients $\geq 18$ years of age; histologically confirmed prostate cancer; presence of metastatic disease according to bone, CT, and/or MRI scan; confirmed castration resistant prostate cancer; due to start or have started first-line treatment with any approved survival-prolonging therapy for mCRPC within a period of 6 months from study entry; ECOG performance status $\leq 2$ | NR                                       | Romero <i>et al</i> , 2017 | (90)       |
|          |                     | 5.02         | 319 | Undefined deleterious mutation | Canada  | Patients with mCRPC                                                                                                                                                                                                                                                                                                                                                                        | NR                                       | Struss <i>et al</i> , 2017 | (95)       |



|       |          |      |     |                                            |                |                                                                                                                                                                                                                                                                      |                                                                             |                               |             |
|-------|----------|------|-----|--------------------------------------------|----------------|----------------------------------------------------------------------------------------------------------------------------------------------------------------------------------------------------------------------------------------------------------------------|-----------------------------------------------------------------------------|-------------------------------|-------------|
|       |          | 5.33 | 150 | Pathogenic germline <i>BRCA2</i> mutations | Multi-national | Affected individuals with metastatic disease accessible by image-guided biopsy were eligible for inclusion and who were being considered for abiraterone acetate or enzalutamide as standard of care, or as part of a clinical trial, were considered for enrollment | NR                                                                          | Robinson <i>et al</i> , 2015  | <u>(89)</u> |
| mCRPC | Somatic  | 2.00 | 50  | <i>BRCA2</i> non-synonymous point mutation | USA            | Lethal heavily pre-treated CRPCs obtained at rapid autopsy; or high-grade localized prostate cancers                                                                                                                                                                 | NR                                                                          | Grasso <i>et al</i> , 2012    | <u>(53)</u> |
|       |          | 5.00 | 514 | Undefined                                  | USA            | Patients with mCRPC that underwent baseline ctDNA analysis for potentially actionable alterations using Guardant360 before new systemic therapy were identified                                                                                                      | NR                                                                          | Sonpavde <i>et al</i> , 2017  | <u>(6)</u>  |
|       |          | 6.00 | 150 | Biallelic mutation                         | Multi-national | Discovery set PC patients were selected based on high Gleason score and availability of both peripheral blood DNA and fresh frozen prostatectomy samples. 150 samples from Robinson 2015 <u>(89)</u>                                                                 | 7 (10);<br>8 (20);<br>9 (60);<br>10 (10)                                    | Decker <i>et al</i> , 2016    | <u>(43)</u> |
| mPC   | Germline | 5.10 | 569 | <i>BRCA2</i> (undefined)                   | Multi-national | Men had to have mPC based on a biopsy of a metastatic site                                                                                                                                                                                                           | NR                                                                          | Nelson <i>et al</i> , 2016    | <u>(79)</u> |
|       |          | 5.35 | 692 | <i>BRCA2</i>                               | Multi-national | Diagnosis of metastatic prostate cancer, as determined by histologic evaluation of a tumor biopsy specimen or surgical resection specimen                                                                                                                            | ≤6 (6.07);<br>3+4 (9.4);<br>4+3 (13.3);<br>8-10 (55.2);<br>unknown (16.0)   | Pritchard <i>et al</i> , 2016 | <u>(87)</u> |
| PC    | Germline | 0.00 | 92  | <i>BRCA2</i> exon sequence variants        | Germany        | Patients with familial PC who are members of families with PC clustering; or patients with sporadic early onset PC who underwent radical prostatectomy and reported a negative family history for prostate cancer                                                    | Gleason ≤7 and <GIII (82.6);<br>Gleason >7 or GIII (15.2);<br>unknown (2.2) | Maier <i>et al</i> , 2014     | <u>(72)</u> |

|  |  |      |      |                                 |                |                                                                                                                                                                                                                          |                                                                        |                               |              |
|--|--|------|------|---------------------------------|----------------|--------------------------------------------------------------------------------------------------------------------------------------------------------------------------------------------------------------------------|------------------------------------------------------------------------|-------------------------------|--------------|
|  |  | 0.00 | 178  | <i>BRCA2</i> truncation variant | Multi-national | Patients with prostate adenocarcinoma and sequence data from germline and tumor DNA; 50% coverage of the targeted exome having at least 20x coverage in both germline and tumor samples.                                 | NR                                                                     | Lu <i>et al</i> , 2015        | <u>(71)</u>  |
|  |  | 1.40 | 1904 | Undefined <i>BRCA2</i>          | Canada         | Men diagnosed with prostate cancer at biopsy in a cohort of men who underwent a prostate biopsy because of an elevated prostate-specific antigen (PSA) blood test (>4.0 ng/ml) or an abnormal digital rectal examination | NR                                                                     | Akbari <i>et al</i> , 2014    | <u>(103)</u> |
|  |  | 1.56 | 2181 | Undefined <i>BRCA2</i>          | UK             | Patients enrolled in the UKGPCS between 1990-2005 with available genomic DNA and clinical and survival data in our prospectively maintained UKGPCS database.                                                             | NR                                                                     | Castro <i>et al</i> , 2011    | <u>(38)</u>  |
|  |  | 1.80 | 333  | <i>BRCA2</i>                    | Multi-national | Patients diagnosed with prostate adenocarcinoma and had not received prior treatment for their disease (chemotherapy, radiotherapy, or hormonal ablation therapy)                                                        | 3+3 (19.5);<br>3+4 (30.6);<br>4+3 (23.4);<br>≥8 (26.4)                 | Cancer Genome Atlas 2015      | <u>(37)</u>  |
|  |  | 9.00 | 221  | <i>BRCA2</i> undefined          | USA            | PC patients consenting to genomic analysis of their tumor and germline DNA                                                                                                                                               | NR                                                                     | Abida <i>et al</i> , 2017     | <u>(30)</u>  |
|  |  | 0.20 | 499  | <i>BRCA2</i>                    | Multi-national | Diagnosis of metastatic prostate cancer, as determined by histologic evaluation of a tumor biopsy specimen or surgical resection specimen                                                                                | ≤6 (9.0);<br>3+4 (29.7);<br>4+3 (20.2);<br>8-10 (41.1);<br>unknown (0) | Pritchard <i>et al</i> , 2016 | <u>(87)</u>  |
|  |  | 0.82 | 486  | <i>BRCA2</i>                    | Multi-national | NR                                                                                                                                                                                                                       | NR                                                                     | Na <i>et al</i> , 2017        | <u>(106)</u> |

|    |         |      |     |                                                       |                |                                                                                                                                                                                               |                                                        |                              |      |
|----|---------|------|-----|-------------------------------------------------------|----------------|-----------------------------------------------------------------------------------------------------------------------------------------------------------------------------------------------|--------------------------------------------------------|------------------------------|------|
| PC | Somatic | 0.00 | 50  | NR                                                    | Multi-national | Discovery set PC patients were selected based on high Gleason score and availability of both peripheral blood DNA and fresh frozen prostatectomy samples. 150 samples from Robinson 2015 (89) | <7 (70);<br>8-10 (22);<br>NR (8)                       | Decker <i>et al</i> , 2016   | (43) |
|    |         | 1.60 | 630 | Gene frequency from DNA_REPAIR gene set               | USA            | Tumor samples were from 4 published retrospective prostatectomy patient cohorts at the Mayo Clinic (MCI and MCII), Cleveland Clinic (CC), and Thomas Jefferson University (TJU)               | NR                                                     | Evans <i>et al</i> , 2016    | (45) |
|    |         | 1.69 | 178 | <i>BRCA2</i> somatic mutation                         | Multi-national | Patients with prostate adenocarcinoma and sequence data from germline and tumor DNA; 50% coverage of the targeted exome having at least 20x coverage in both germline and tumor samples       | NR                                                     | Lu <i>et al</i> , 2015       | (71) |
|    |         | 3.00 | 333 | Undefined <i>BRCA2</i> mutation                       | Multi-national | Patients diagnosed with prostate adenocarcinoma, and had not received prior treatment for their disease (chemotherapy, radiotherapy, or hormonal ablation therapy)                            | 3+3 (19.5);<br>3+4 (30.6);<br>4+3 (23.4);<br>≥8 (26.4) | Cancer Genome Atlas 2015     | (37) |
|    |         | 4.00 | 327 | <i>BRCA2</i>                                          | USA            | Men with prostate cancer who had undergone treatment at the Dana Farber Cancer Institute; consented to targeted next generation sequencing                                                    | NR                                                     | Patel <i>et al</i> , 2016    | (83) |
|    |         | 5.80 | 207 | Known or likely deleterious mutations in <i>BRCA2</i> | USA            | Men with PC; no other details                                                                                                                                                                 | NR                                                     | Lara <i>et al</i> , 2017     | (66) |
|    |         | 6.00 | 69  | <i>BRCA2</i> SNVs and indels                          | Multi-national | NR                                                                                                                                                                                            | NR                                                     | Fontugne <i>et al</i> , 2015 | (47) |

|  |  |       |     |                                                       |     |                                                                            |                                                        |                           |      |
|--|--|-------|-----|-------------------------------------------------------|-----|----------------------------------------------------------------------------|--------------------------------------------------------|---------------------------|------|
|  |  | 7.00  | 451 | <i>BRCA2</i> undefined                                | USA | PC patients consenting to genomic analysis of their tumor and germline DNA | 6 (5.5);<br>7 (31.0);<br>8-10 (57.2);<br>unknown (6.2) | Abida <i>et al</i> , 2017 | (30) |
|  |  | 11.43 | 936 | Known or likely deleterious mutations in <i>BRCA2</i> | USA | Men with PC; no other details                                              | NR                                                     | Lara <i>et al</i> , 2017  | (66) |
|  |  | 11.76 | 85  | Undefined                                             | USA | Advanced prostate cancer patients                                          | NR                                                     | Myers <i>et al</i> , 2016 | (76) |

<sup>a</sup>Study level inclusion criteria may not reflect prostate subgroups, because multiple groups are included. *BRCA*, breast cancer susceptibility gene; CRPC, castration-resistant PC; CT, computed tomography; DDR, DNA damage repair; ECOG, Eastern Cooperative Oncology Group; m, metastatic; MRI, magnetic resonance imaging; NR, not reported; PC, prostate cancer; SNVs, single nucleotide variations; UKGPCS, UK Genetic Prostate Cancer Study. More baseline details can be found in Appendix S5.

#### (E) Mutations in the *CHEK2* gene.

| PC group | Germline or somatic | % prevalence | N   | DDR definition           | Country        | Study level inclusion criteria <sup>a</sup>                                                                                                                                                                                                                                                                                                                                    | Baseline Gleason score (% of population) | Author, year               | References |
|----------|---------------------|--------------|-----|--------------------------|----------------|--------------------------------------------------------------------------------------------------------------------------------------------------------------------------------------------------------------------------------------------------------------------------------------------------------------------------------------------------------------------------------|------------------------------------------|----------------------------|------------|
| mCRPC    | Germline            | 0.95         | 419 | Undefined                | Spain          | Patients ≥18years of age; histologically confirmed prostate cancer; presence of metastatic disease according to bone, CT, and/or MRI scan; confirmed castration resistant prostate cancer; due to start or have started first-line treatment with any approved survival-prolonging therapy for mCRPC within a period of 6 months from study entry; ECOG performance status ≤21 | NR                                       | Romero <i>et al</i> , 017  | (90)       |
| mPC      | Germline            | 1.20         | 569 | <i>CHEK2</i> (undefined) | Multi-national | Men had to have mPC based on a biopsy of a metastatic site                                                                                                                                                                                                                                                                                                                     | NR                                       | Nelson <i>et al</i> , 2016 | (79)       |

|    |          |       |     |                                                      |                |                                                                                                                                                                                 |                                                            |                               |       |
|----|----------|-------|-----|------------------------------------------------------|----------------|---------------------------------------------------------------------------------------------------------------------------------------------------------------------------------|------------------------------------------------------------|-------------------------------|-------|
|    |          | 1.87  | 534 | <i>CHEK2</i>                                         | Multi-national | Diagnosis of metastatic prostate cancer, as determined by histologic evaluation of a tumor biopsy specimen or surgical resection specimen                                       | NR                                                         | Pritchard <i>et al</i> , 2016 | (87)  |
| PC | Germline | 1.79  | 613 | <i>CHEK2</i> germline pathogenic mutations           | Multi-national | NR                                                                                                                                                                              | NR                                                         | Na <i>et al</i> , 2017        | (106) |
|    |          | 4.00  | 221 | <i>CHEK2</i> undefined                               | USA            | PC patients consenting to genomic analysis of their tumor and germline DNA                                                                                                      | NR                                                         | Abida <i>et al</i> , 2017     | (30)  |
|    |          | 0.40  | 499 | <i>CHEK2</i>                                         | Multi-national | Diagnosis of metastatic prostate cancer, as determined by histologic evaluation of a tumor biopsy specimen or surgical resection specimen                                       | ≤6 (9.0); 3+4 (29.7); 4+3 (20.2); 8-10 (41.1); unknown (0) | Pritchard <i>et al</i> , 2016 | (87)  |
|    |          | 1.70  | 352 | <i>CHEK2</i> germline pathogenic mutations           | Multi-national | NR                                                                                                                                                                              | NR                                                         | Na <i>et al</i> , 2017        | (106) |
|    |          | 10.71 | 84  | all <i>CHEK2</i> mutations                           | USA            | Primary prostate tumor tissues                                                                                                                                                  | NR                                                         | Wu <i>et al</i> , 2006        | (100) |
| PC | Somatic  | 0.80  | 630 | gene frequency from DNA_DAMAGE_CHEKPOINT gene set    | USA            | Tumor samples were from 4 published retrospective prostatectomy patient cohorts at the Mayo Clinic (MCI and MCII), Cleveland Clinic (CC), and Thomas Jefferson University (TJU) | NR                                                         | Evans <i>et al</i> , 2016     | (45)  |
|    |          | 1.19  | 84  | Defective <i>CHEK2</i> genes (both alleles affected) | Multi-national | Selection of PC patients from a commercial biobank and the Transatlantic Prostate Group Cohort                                                                                  | NR                                                         | Timms <i>et al</i> , 2016     | (96)  |

|                                                                                                                                                                                                                                                                                                                                                                                                       |  |      |    |                            |     |                                |    |                        |       |
|-------------------------------------------------------------------------------------------------------------------------------------------------------------------------------------------------------------------------------------------------------------------------------------------------------------------------------------------------------------------------------------------------------|--|------|----|----------------------------|-----|--------------------------------|----|------------------------|-------|
|                                                                                                                                                                                                                                                                                                                                                                                                       |  | 2.38 | 84 | All <i>CHEK2</i> mutations | USA | Primary prostate tumor tissues | NR | Wu <i>et al</i> , 2006 | (100) |
| <sup>a</sup> Study level inclusion criteria may not reflect prostate subgroups, because multiple groups are included. <i>CHEK2</i> , checkpoint kinase 2; CRPC, castration-resistant PC; CT, computed tomography; ECOG, Eastern Cooperative Oncology Group; m, metastatic; MRI, magnetic resonance imaging; NR, not reported; PC, prostate cancer. More baseline details can be found in Appendix S5. |  |      |    |                            |     |                                |    |                        |       |

### (F) Mutations in DDR genes

| PC group | Germline or somatic | % prevalence | N   | DDR definition                                                                                               | Country | Study level inclusion criteria <sup>a</sup>                                                                                                                                                                                                                                                                                                                                                | Baseline Gleason score (% of population) | Author, year               | References |
|----------|---------------------|--------------|-----|--------------------------------------------------------------------------------------------------------------|---------|--------------------------------------------------------------------------------------------------------------------------------------------------------------------------------------------------------------------------------------------------------------------------------------------------------------------------------------------------------------------------------------------|------------------------------------------|----------------------------|------------|
| mCRPC    | Germline            | 7.50         | 319 | Undefined deleterious germline DDR mutations (22 genes including <i>BRCA2</i> , <i>PALB2</i> , <i>CDK2</i> ) | Canada  | Patients with mCRPC                                                                                                                                                                                                                                                                                                                                                                        | NR                                       | Struss <i>et al</i> , 2017 | (95)       |
|          |                     | 9.10         | 419 | Aberrations in 24 DNA repair genes                                                                           | Spain   | Patients $\geq 18$ years of age; histologically confirmed prostate cancer; presence of metastatic disease according to bone, CT, and/or MRI scan; confirmed castration resistant prostate cancer; due to start or have started first-line treatment with any approved survival-prolonging therapy for mCRPC within a period of 6 months from study entry; ECOG performance status $\leq 1$ | NR                                       | Romero <i>et al</i> , 2017 | (90)       |

|     |          |       |     |                                                                                                                                                                                                                                                                                                                          |                |                                                                                                                                                                    |                                                               |                               |      |
|-----|----------|-------|-----|--------------------------------------------------------------------------------------------------------------------------------------------------------------------------------------------------------------------------------------------------------------------------------------------------------------------------|----------------|--------------------------------------------------------------------------------------------------------------------------------------------------------------------|---------------------------------------------------------------|-------------------------------|------|
| mPC | Germline | 11.40 | 569 | 20 DNA repair genes associated with autosomal dominant cancer predisposition syndromes (included <i>BRCA2</i> , <i>ATM</i> , <i>CHEK2</i> , <i>BRCA1</i> , <i>PALB2</i> , <i>RAD51D</i> , <i>ATR</i> , <i>FAM175A</i> , <i>GEN1</i> , <i>MRE11A</i> , <i>MSH2</i> , <i>MSH6</i> , <i>RAD51C</i> , <i>NBN</i> ).          | Multi-national | Men had to have mPC based on a biopsy of a metastatic site                                                                                                         | NR                                                            | Nelson <i>et al</i> , 2016    | (79) |
|     |          | 11.80 | 692 | DDR (20-gene panel: <i>ATM</i> , <i>ATR</i> , <i>BAP1</i> , <i>BARD1</i> , <i>BRCA1</i> , <i>BRCA2</i> , <i>BRIP1</i> , <i>CHEK2</i> , <i>FAM175A</i> , <i>GEN1</i> , <i>MLH1</i> , <i>MRE11A</i> , <i>MSH2</i> , <i>MSH6</i> , <i>NBN</i> , <i>PALB2</i> , <i>PMS2</i> , <i>RAD51C</i> , <i>RAD51D</i> , <i>XRCC2</i> ) | Multi-national | Diagnosis of metastatic prostate cancer, as determined by histologic evaluation of a tumor biopsy specimen or surgical resection specimen                          | ≤6 (6.07); 3+4 (9.4); 4+3 (13.3); 8-10 (55.2); unknown (16.0) | Pritchard <i>et al</i> , 2016 | (79) |
| mPC | Somatic  | 10.00 | 50  | MMR (mismatch repair) genes                                                                                                                                                                                                                                                                                              | USA            | Human primary and metastatic prostate cancer tissues were obtained as part of the University of Washington Prostate Cancer Donor Rapid Autopsy Program             | NR                                                            | Pritchard <i>et al</i> , 2014 | (86) |
|     |          | 16.40 | 55  | <i>BRCA1</i> , <i>BRCA2</i> , <i>ATM</i>                                                                                                                                                                                                                                                                                 | USA            | Patients with metastatic prostate cancer                                                                                                                           | NR                                                            | Gourdin <i>et al</i> , 2016   | (52) |
| PC  | Germline | 18.62 | 333 | <i>ATM</i> , <i>BRCA1</i> , <i>BRCA2</i> , <i>CDK12</i> , <i>FANCD2</i> , <i>RAD51C</i>                                                                                                                                                                                                                                  | Multi-national | Patients diagnosed with prostate adenocarcinoma, and had not received prior treatment for their disease (chemotherapy, radiotherapy, or hormonal ablation therapy) | 3+3 (19.5); 3+4 (30.6); 4+3 (23.4); ≥8 (26.4)                 | Cancer Genome Atlas 2015      | (37) |
|     |          | 19.00 | 221 | DDR (including <i>BRIP1</i> , <i>NBN</i> , <i>PALB2</i> , <i>PMS2</i> , <i>MITF</i> , <i>RECQL</i> , <i>ATM</i> , <i>CHEK2</i> , <i>BRCA1</i> , <i>BRCA2</i> , <i>FH</i> )                                                                                                                                               | USA            | PC patients consenting to genomic analysis of their tumor and germline DNA                                                                                         | NR                                                            | Abida <i>et al</i> , 2017     | (30) |

|    |         |       |      |                                                                                                                                                              |                |                                                                                                |                                               |                               |      |
|----|---------|-------|------|--------------------------------------------------------------------------------------------------------------------------------------------------------------|----------------|------------------------------------------------------------------------------------------------|-----------------------------------------------|-------------------------------|------|
|    |         | 17.2  | 1158 | DDR (included 14 genes on a hereditary PC panel, most of which were DNA repair genes, including <i>BRCA</i> and <i>BRCA2</i> )                               | USA            | Men with PC                                                                                    | NR                                            | Nicolosi <i>et al</i> , 2017  | (81) |
| PC | Somatic | 13.10 | 84   | Defective DDR genes (one allele affected); <i>RAD50</i> , <i>ATM</i> , <i>NBN</i> , <i>ATR</i> , <i>PPP2R2A</i> , <i>CHEK2</i> , <i>FANCA</i> , <i>RAD52</i> | Multi-national | Selection of PC patients from a commercial biobank and the Transatlantic Prostate Group Cohort | NR                                            | Timms <i>et al</i> , 2016     | (96) |
|    |         | 22.00 | 451  | DDR (including <i>BRCA2</i> , <i>BRCA1</i> , <i>ATM</i> , <i>FANCA</i> , <i>RAD50</i> , <i>PALB2</i> , and <i>CDK12</i> )                                    | USA            | PC patients consenting to genomic analysis of their tumor and germline DNA                     | 6 (5.5); 7 (31.0); 8-10 (57.2); unknown (6.2) | Abida <i>et al</i> , 2017     | (30) |
|    |         | 4.90  | 61   | DNA repair genes such as <i>ATM</i>                                                                                                                          | UK             | Primary prostate cancer samples for the Welsh Cancer Bank                                      | NR                                            | Jefferies <i>et al</i> , 2017 | (61) |

<sup>a</sup>Study level inclusion criteria may not reflect prostate subgroups, because multiple groups are included. *ATM*, ataxia telangiectasia mutated; *ATR*, ataxia telangiectasia and Rad3-related protein; *BAP1*, *BRCA1*-associated protein 1; *BARD1*, *BRCA1*-associated RING domain 1; *BRCA*, breast cancer susceptibility gene; *BRIPI*, *BRCA1* interacting protein C-terminal helicase 1; *CHEK2*, checkpoint kinase 2; CRPC, castration-resistant PC; CT, computed tomography; DDR, DNA damage repair; ECOG, Eastern Cooperative Oncology Group; *FAM175A*, family with sequence similarity 175, member A; FANCA, Fanconi anemia complementation group; *FH*, fumarate hydratase; *GEN1*, GEN1, Holliday junction 5' flap endonuclease; m, metastatic; *MITF*, melanogenesis-associated transcription factor; *MLH1*, mutL homolog 1; MMR, mismatch repair; *MRE11A*, *MRE11* homolog A, double-strand break repair nuclease; MRI, magnetic resonance imaging; MSH, muS homolog; *NBN*, nibrin; *PALB2*, partner and localizer of *BRCA2*; NR, not reported; PC, prostate cancer; *PMS2*, *PMS1* homolog 2, mismatch repair system component; *PPP2R2A*, protein phosphatase 2 regulatory subunit B alpha; RAD, DNA repair protein; *RECQL*, RecQ like helicase; RING, really interesting new gene; XRCC, x-ray repair cross complementing. More baseline details can be found in Appendix S4.

### (G) Mutations in *FANCA* gene.

| PC group | Germline or somatic | % prevalence | N | DDR definition | Country | Study level inclusion criteria <sup>a</sup> | Baseline Gleason score (% of population) | Author, year | References |
|----------|---------------------|--------------|---|----------------|---------|---------------------------------------------|------------------------------------------|--------------|------------|
|----------|---------------------|--------------|---|----------------|---------|---------------------------------------------|------------------------------------------|--------------|------------|



|                                                                                                                                                                                                                                                                                                     |          |       |     |                                                      |                |                                                                                                                                                                                         |                                                        |                             |      |
|-----------------------------------------------------------------------------------------------------------------------------------------------------------------------------------------------------------------------------------------------------------------------------------------------------|----------|-------|-----|------------------------------------------------------|----------------|-----------------------------------------------------------------------------------------------------------------------------------------------------------------------------------------|--------------------------------------------------------|-----------------------------|------|
| PC                                                                                                                                                                                                                                                                                                  | Germline | 0.56  | 178 | <i>FANCA</i> truncation variant                      | Multi-national | Patients with prostate adenocarcinoma and sequence data from germline and tumor DNA; 50% coverage of the targeted exome having at least 20x coverage in both germline and tumor samples | NR                                                     | Lu <i>et al</i> , 2015      | (71) |
| PC                                                                                                                                                                                                                                                                                                  | Somatic  | 0.50  | 630 | Gene frequency from DNA_REPAIR gene set              | USA            | Tumor samples were from 4 published retrospective prostatectomy patient cohorts at the Mayo Clinic (MCI and MCII), Cleveland Clinic (CC), and Thomas Jefferson University (TJU)         | NR                                                     | Evans <i>et al</i> , 2016   | (45) |
|                                                                                                                                                                                                                                                                                                     |          | 1.19  | 84  | Defective <i>FANCA</i> genes (both alleles affected) | Multi-national | Selection of PC patients from a commercial biobank and the Transatlantic Prostate Group Cohort                                                                                          | NR                                                     | Timms <i>et al</i> , 2016   | (96) |
|                                                                                                                                                                                                                                                                                                     |          | 3.00  | 451 | <i>FANCA</i> undefined                               | USA            | PC patients consenting to genomic analysis of their tumor and germline DNA                                                                                                              | 6 (5.5);<br>7 (31.0);<br>8-10 (57.2);<br>unknown (6.2) | Abida <i>et al</i> , 2017   | (30) |
|                                                                                                                                                                                                                                                                                                     |          | 16.00 | 69  | <i>FANCA</i> deletion                                | USA            | Mixed population of localized PC (n=69) and advanced mPC (n=29).                                                                                                                        | NR                                                     | Beltran <i>et al</i> , 2015 | (19) |
| <sup>a</sup> Study level inclusion criteria may not reflect prostate subgroups, because multiple groups are included. DDR, DNA damage repair; FANCA, Fanconi anemia complementation group; m, metastatic; NR, not reported; PC, prostate cancer. More baseline details can be found in Appendix S5. |          |       |     |                                                      |                |                                                                                                                                                                                         |                                                        |                             |      |

#### (H) Mutations in the *MLH1* gene.

| PC group | Germline or somatic | % prevalence | N   | DDR definition | Country        | Study level inclusion criteria <sup>a</sup>                                                                                               | Baseline Gleason score (% of population)                                      | Author, year                  | References |
|----------|---------------------|--------------|-----|----------------|----------------|-------------------------------------------------------------------------------------------------------------------------------------------|-------------------------------------------------------------------------------|-------------------------------|------------|
| mPC      | Germline            | 0.00         | 692 | <i>MLH1</i>    | Multi-national | Diagnosis of metastatic prostate cancer, as determined by histologic evaluation of a tumor biopsy specimen or surgical resection specimen | ≤6 (6.07);<br>3 + 4 (9.4);<br>4 + 3 (13.3);<br>8-10 (55.2);<br>unknown (16.0) | Pritchard <i>et al</i> , 2016 | (87)       |

|                                                                                                                                                                                                                                                                                           |          |      |     |                                                                                         |                |                                                                                                                                                                                 |                                                            |                               |      |
|-------------------------------------------------------------------------------------------------------------------------------------------------------------------------------------------------------------------------------------------------------------------------------------------|----------|------|-----|-----------------------------------------------------------------------------------------|----------------|---------------------------------------------------------------------------------------------------------------------------------------------------------------------------------|------------------------------------------------------------|-------------------------------|------|
| mPC                                                                                                                                                                                                                                                                                       | Somatic  | 3.33 | 60  | All <i>MLHI</i> ( <i>MLHI</i> homozygous copy loss, <i>MLHI</i> frameshift (c.1310del)) | USA            | Human primary and metastatic prostate cancer tissues were obtained as part of the University of Washington Prostate Cancer Donor Rapid Autopsy Program                          | NR                                                         | Pritchard <i>et al</i> , 2014 | (86) |
| PC                                                                                                                                                                                                                                                                                        | Somatic  | 0.20 | 630 | Gene frequency from DNA_REPAIR gene set                                                 | USA            | Tumor samples were from 4 published retrospective prostatectomy patient cohorts at the Mayo Clinic (MCI and MCII), Cleveland Clinic (CC), and Thomas Jefferson University (TJU) | NR                                                         | Evans <i>et al</i> , 2016     | (45) |
|                                                                                                                                                                                                                                                                                           |          | 1.00 | 451 | <i>MLHI</i> undefined                                                                   | USA            | PC patients consenting to genomic analysis of their tumor and germline DNA                                                                                                      | 6 (5.5); 7 (31.0); 8-10 (57.2); unknown (6.2)              | Abida <i>et al</i> , 2017     | (30) |
| PC                                                                                                                                                                                                                                                                                        | Germline | 0.00 | 499 | <i>MLHI</i>                                                                             | Multi-national | Diagnosis of metastatic prostate cancer, as determined by histologic evaluation of a tumor biopsy specimen or surgical resection specimen                                       | ≤6 (9.0); 3+4 (29.7); 4+3 (20.2); 8-10 (41.1); unknown (0) | Pritchard <i>et al</i> , 2016 | (87) |
| <p><sup>a</sup>Study level inclusion criteria may not reflect prostate subgroups, because multiple groups are included. DDR, DNA damage repair; m, metastatic; <i>MLHI</i>, mutL homolog 1; NR, not reported; PC, prostate cancer. More baseline details can be found in Appendix S5.</p> |          |      |     |                                                                                         |                |                                                                                                                                                                                 |                                                            |                               |      |

### (I) Mutations in the *MRE11A* gene.

| PC group | Germline or somatic | % prevalence | N   | DDR definition            | Country        | Study level inclusion criteria <sup>a</sup>                                                                                               | Baseline Gleason score (% of population)                      | Author, year                  | References |
|----------|---------------------|--------------|-----|---------------------------|----------------|-------------------------------------------------------------------------------------------------------------------------------------------|---------------------------------------------------------------|-------------------------------|------------|
| mPC      | Germline            | 0.14         | 692 | <i>MRE11A</i>             | Multi-national | Diagnosis of metastatic prostate cancer, as determined by histologic evaluation of a tumor biopsy specimen or surgical resection specimen | ≤6 (6.07); 3+4 (9.4); 4+3 (13.3); 8-10 (55.2); unknown (16.0) | Pritchard <i>et al</i> , 2016 | (87)       |
|          |                     | 0.18         | 569 | <i>MRE11A</i> (undefined) | Multi-national | Men had to have mPC based on a biopsy of a metastatic site                                                                                | NR                                                            | Nelson <i>et al</i> , 2016    | (79)       |

|    |          |      |     |                                         |                |                                                                                                                                                                                |                                                            |                               |      |
|----|----------|------|-----|-----------------------------------------|----------------|--------------------------------------------------------------------------------------------------------------------------------------------------------------------------------|------------------------------------------------------------|-------------------------------|------|
| PC | Somatic  | 0.00 | 630 | Gene frequency from DNA_REPAIR gene set | USA            | Tumor samples were from 4 published retrospective prostatectomy patient cohorts at the Mayo Clinic (MCI and MCII) Cleveland Clinic (CC), and Thomas Jefferson University (TJU) | NR                                                         | Evans <i>et al</i> , 2016     | (45) |
| PC | Germline | 0.20 | 499 | <i>MRE11A</i>                           | Multi-national | Diagnosis of metastatic prostate cancer, as determined by histologic evaluation of a tumor biopsy specimen or surgical resection specimen                                      | ≤6 (9.0); 3+4 (29.7); 4+3 (20.2); 8-10 (41.1); unknown (0) | Pritchard <i>et al</i> , 2016 | (87) |

<sup>a</sup>Study level inclusion criteria may not reflect prostate subgroups, because multiple groups are included. DDR, DNA damage repair; m, metastatic; *MRE11A*, *MRE11* homolog A, double-strand break repair nuclease; NR, not reported; PC, prostate cancer. More baseline details can be found in Appendix S5.

#### (J) Mutations in the *NBN* gene.

| PC group | Germline or somatic | % prevalence | N   | DDR definition         | Country        | Study level inclusion criteria <sup>a</sup>                                                                                               | Baseline Gleason score (% of population)                      | Author, year                  | References |
|----------|---------------------|--------------|-----|------------------------|----------------|-------------------------------------------------------------------------------------------------------------------------------------------|---------------------------------------------------------------|-------------------------------|------------|
| mPC      | Germline            | 0.18         | 569 | <i>NBN</i> (undefined) | Multi-national | Men had to have mPC based on a biopsy of a metastatic site                                                                                | NR                                                            | Nelson <i>et al</i> , 2016    | (79)       |
|          |                     | 0.29         | 692 | <i>NBN</i>             | Multi-national | Diagnosis of metastatic prostate cancer, as determined by histologic evaluation of a tumor biopsy specimen or surgical resection specimen | ≤6 (6.07); 3+4 (9.4); 4+3 (13.3); 8-10 (55.2); unknown (16.0) | Pritchard <i>et al</i> , 2016 | (87)       |
| PC       | Germline            | 0.45         | 221 | <i>NBN</i> undefined   | USA            | PC patients consenting to genomic analysis of their tumor and germline DNA                                                                | NR                                                            | Abida <i>et al</i> , 2017     | (30)       |
|          |                     | 0.20         | 499 | <i>NBN</i>             | Multi-national | Diagnosis of metastatic prostate cancer, as determined by histologic evaluation of a tumor biopsy specimen or surgical resection specimen | ≤6 (9.0); 3+4 (29.7); 4+3 (20.2); 8-10 (41.1); unknown (0)    | Pritchard <i>et al</i> , 2016 | (87)       |

|    |         |       |     |                                                    |                |                                                                                                                                                                                 |    |                              |      |
|----|---------|-------|-----|----------------------------------------------------|----------------|---------------------------------------------------------------------------------------------------------------------------------------------------------------------------------|----|------------------------------|------|
| PC | Somatic | 0.30  | 630 | Gene frequency from DNA_REPAIR gene set            | USA            | Tumor samples were from 4 published retrospective prostatectomy patient cohorts at the Mayo Clinic (MCI and MCII), Cleveland Clinic (CC), and Thomas Jefferson University (TJU) | NR | Evans <i>et al</i> , 2016    | (45) |
|    |         | 1.19  | 84  | Defective <i>NBN</i> genes (both alleles affected) | Multi-national | Selection of PC patients from a commercial biobank and the Transatlantic Prostate Group Cohort                                                                                  | NR | Timms <i>et al</i> , 2016    | (96) |
|    |         | 65.00 | 69  | <i>NBN</i> amplifications                          | Multi-national | NR                                                                                                                                                                              | NR | Fontugne <i>et al</i> , 2015 | (47) |

<sup>a</sup>Study level inclusion criteria may not reflect prostate subgroups, because multiple groups are included. DDR, DNA damage repair; m, metastatic; *NBN*, nibrin; NR, not reported; PC, prostate cancer. More baseline details can be found in Appendix S5.

### (K) Mutations in the *PALB2* gene.

| PC group | Germline or somatic | % prevalence | N   | DDR definition                                   | Country        | Study level inclusion criteria <sup>a</sup>                                                                                               | Baseline Gleason score (% of population)                      | Author, year                  | References |
|----------|---------------------|--------------|-----|--------------------------------------------------|----------------|-------------------------------------------------------------------------------------------------------------------------------------------|---------------------------------------------------------------|-------------------------------|------------|
| mCRPC    | Germline            | 0.63         | 319 | Undefined deleterious mutation                   | Canada         | Patients with mCRPC                                                                                                                       | NR                                                            | Struss <i>et al</i> , 2017    | (95)       |
| mCRPC    | Somatic             | 4.00         | 153 | <i>PALB2</i> mut/del in metastatic tumor samples | USA            | PC patients consenting to genomic analysis of their tumor and germline DNA                                                                | NR                                                            | Abida <i>et al</i> , 2017     | (30)       |
| mPC      | Germline            | 0.43         | 692 | <i>PALB2</i>                                     | Multi-national | Diagnosis of metastatic prostate cancer, as determined by histologic evaluation of a tumor biopsy specimen or surgical resection specimen | ≤6 (6.07); 3+4 (9.4); 4+3 (13.3); 8-10 (55.2); unknown (16.0) | Pritchard <i>et al</i> , 2016 | (87)       |
|          |                     | 0.50         | 569 | <i>PALB2</i> (undefined)                         | Multi-national | Men had to have mPC based on a biopsy of a metastatic site                                                                                | NR                                                            | Nelson <i>et al</i> , 2016    | (79)       |
| mPC      | Somatic             | 0.00         | 70  | <i>PALB2</i> mut/del in metastatic tumor samples | USA            | PC patients consenting to genomic analysis of their tumor and germline DNA                                                                | NR                                                            | Abida <i>et al</i> , 2017     | (30)       |

|                                                                                                                                                                                                                                                                                                                      |          |      |     |                                                  |                |                                                                                                                                                                                         |                                                            |                               |      |
|----------------------------------------------------------------------------------------------------------------------------------------------------------------------------------------------------------------------------------------------------------------------------------------------------------------------|----------|------|-----|--------------------------------------------------|----------------|-----------------------------------------------------------------------------------------------------------------------------------------------------------------------------------------|------------------------------------------------------------|-------------------------------|------|
| PC                                                                                                                                                                                                                                                                                                                   | Germline | 0.45 | 221 | <i>PALB2</i> undefined                           | USA            |                                                                                                                                                                                         | NR                                                         | Abida <i>et al</i> , 2017     | (30) |
|                                                                                                                                                                                                                                                                                                                      |          | 0.56 | 178 | <i>PALB2</i> truncations                         | Multi-national | Patients with prostate adenocarcinoma and sequence data from germline and tumor DNA; 50% coverage of the targeted exome having at least 20x coverage in both germline and tumor samples | NR                                                         | Lu <i>et al</i> , 2015        | (71) |
|                                                                                                                                                                                                                                                                                                                      |          | 0.40 | 499 | <i>PALB2</i>                                     | Multi-national | Diagnosis of metastatic prostate cancer, as determined by histologic evaluation of a tumor biopsy specimen or surgical resection specimen                                               | ≤6 (9.0); 3+4 (29.7); 4+3 (20.2); 8-10 (41.1); unknown (0) | Pritchard <i>et al</i> , 2016 | (87) |
| PC                                                                                                                                                                                                                                                                                                                   | Somatic  | 0.60 | 630 | gene frequency from REACTOME_DNA_REPAIR gene set | USA            | Tumor samples were from 4 published retrospective prostatectomy patient cohorts at the Mayo Clinic (MCI and MCII), Cleveland Clinic (CC), and Thomas Jefferson University (TJU).        | NR                                                         | Evans <i>et al</i> , 2016     | (45) |
|                                                                                                                                                                                                                                                                                                                      |          | 2.00 | 451 | <i>PALB2</i> undefined                           | USA            | PC patients consenting to genomic analysis of their tumor and germline DNA                                                                                                              | 6 (5.5); 7 (31.0); 8-10 (57.2); unknown (6.2)              | Abida <i>et al</i> , 2017     | (30) |
| <sup>a</sup> Study level inclusion criteria may not reflect prostate subgroups, because multiple groups are included. CRPC, castration-resistant PC; m, metastatic; NR, not reported; <i>PALB2</i> , partner and localizer of <i>BRCA2</i> ; PC, prostate cancer. More baseline details can be found in Appendix S5. |          |      |     |                                                  |                |                                                                                                                                                                                         |                                                            |                               |      |

**(L) Mutations in the *RAD51C* gene.**

| PC group | Germline or somatic | % prevalence | N | DDR definition | Country | Study level inclusion criteria <sup>a</sup> | Baseline Gleason score (% of population) | Author, year | References |
|----------|---------------------|--------------|---|----------------|---------|---------------------------------------------|------------------------------------------|--------------|------------|
|----------|---------------------|--------------|---|----------------|---------|---------------------------------------------|------------------------------------------|--------------|------------|

|     |          |      |     |                                         |                |                                                                                                                                                                                          |                                                                           |                               |      |
|-----|----------|------|-----|-----------------------------------------|----------------|------------------------------------------------------------------------------------------------------------------------------------------------------------------------------------------|---------------------------------------------------------------------------|-------------------------------|------|
| mPC | Germline | 0.14 | 692 | <i>RAD51C</i>                           | Multi-national | Diagnosis of metastatic prostate cancer, as determined by histologic evaluation of a tumor biopsy specimen or surgical resection specimen                                                | ≤6 (6.07);<br>3+4 (9.4);<br>4+3 (13.3);<br>8-10 (55.2);<br>unknown (16.0) | Pritchard <i>et al</i> , 2016 | (87) |
|     |          | 0.18 | 569 | <i>RAD51C</i> (undefined)               | Multi-national | Men had to have mPC based on a biopsy of a metastatic site                                                                                                                               | NR                                                                        | Nelson <i>et al</i> , 2016    | (79) |
| PC  | Germline | 0.56 | 178 | <i>RAD51C</i> truncation variant        | Multi-national | Patients with prostate adenocarcinoma and sequence data from germline and tumor DNA; 50% coverage of the targeted exome having at least 20x coverage in both germline and tumor samples. | NR                                                                        | Lu <i>et al</i> , 2015        | (71) |
|     |          | 0.40 | 499 | <i>RAD51C</i>                           | Multi-national | Diagnosis of metastatic prostate cancer, as determined by histologic evaluation of a tumor biopsy specimen or surgical resection specimen                                                | ≤6 (9.0);<br>3+4 (29.7);<br>4+3 (20.2);<br>8-10 (41.1);<br>unknown (0)    | Pritchard <i>et al</i> , 2016 | (87) |
| PC  | Somatic  | 0.00 | 630 | Gene frequency from DNA_REPAIR gene set | USA            | Tumor samples were from 4 published retrospective prostatectomy patient cohorts at the Mayo Clinic (MCI and MCII), Cleveland Clinic (CC), and Thomas Jefferson University (TJU)          | NR                                                                        | Evans <i>et al</i> , 2016     | (45) |
|     |          | 3.00 | 333 | any <i>RAD51C</i>                       | Multi-national | Patients diagnosed with prostate adenocarcinoma, and had not received prior treatment for their disease (chemotherapy, radiotherapy, or hormonal ablation therapy)                       | 3+3 (19.5);<br>3+4 (30.6);<br>4+3 (23.4);<br>≥8 (26.4)                    | Cancer Genome Atlas 2015      | (37) |

<sup>a</sup>Study level inclusion criteria may not reflect prostate subgroups, because multiple groups are included. DDR, DNA damage repair; m, metastatic; NR, not reported; PC, prostate cancer; RAD, DNA repair protein. More baseline details can be found in Appendix S5.

## References

1. Higgins JPT and Green S (eds.): *Cochrane handbook for systematic reviews of interventions* [Internet]. The Cochrane Collaboration, Version 5.1.0 [updated March 2011], 2011 [accessed 23.3.11].
2. Centre for Reviews and Dissemination: *Systematic Reviews: CRD's guidance for undertaking reviews in health care* [Internet]. University of York, York, 2009 [accessed 23.3.11].
3. McGowan J, Sampson M and Lefebvre C: An evidence based checklist for the peer review of electronic search strategies (PRESS EBC). *Evid Based Libr Inf Pract* 5: 1-6, 2010.
4. Canadian Agency for Drugs and Technologies in Health: *PRESS - Peer Review of Electronic Search Strategies: 2015 Guideline Explanation and Elaboration (PRESS E&E)* [Internet]. CADTH, Ottawa, 2016 [accessed 10.8.17].
5. Liu Z, Zhou M, Lepor H, Zoino R, Rajoria G and Klimek S: Mutational analysis of prostate cancer using next generation cancer hotspot panel. *Lab Invest* 96: 246A-247A, 2016.
6. Sonpavde G, Nagy RJ, Sartor AO, et al.: Circulating tumor (ct)-DNA alterations in metastatic castration-resistant prostate cancer (mCRPC): Association with outcomes and evolution with therapy. *J Clin Oncol* 35: no pagination, 2017.
7. Tanaka Y, Zaman MS, Majid S, et al.: Polymorphisms of MLH1 in benign prostatic hyperplasia and sporadic prostate cancer. *Biochem Biophys Res Commun* 383: 440-444, 2009.
8. Dall'Era M, Glass A, Lara P, Hartmaier R, De Vere White R and McPherson J: Frequency of DNA repair gene mutations in localized and metastatic prostate cancer. *J Clin Oncol* 35: no pagination, 2017.
9. Daniel S, Gornstein E, Frampton GM, et al.: BRCA1/2 reversion mutations in prostate cancer identified from clinical tissue and liquid biopsy samples. *J Clin Oncol* 35: no pagination, 2017.
10. Feldman RA, Dan Basu G, Xiu J, et al.: Molecular profiling of advanced refractory prostate cancer. *J Clin Oncol* 32: no pagination, 2014.
11. Dawson NA, Heath EI, Feldman R, et al.: Use of panomic assessment to reveal DNA repair alterations and to predict potential therapeutic response to taxaneplatinum combination therapy in prostate cancer. *J Clin Oncol* 34: no pagination, 2016.
12. Uchida T, Wang C, Sato T, et al.: BRCA1 gene mutation and loss of heterozygosity on chromosome 17q21 in primary prostate cancer. *Int J Cancer* 84: 19-23, 1999.
13. Angele S, Falconer A, Edwards SM, et al.: ATM polymorphisms as risk factors for prostate cancer development. *Br J Cancer* 91: 783-787, 2004.
14. Browning REt, Li H, Shinohara ET, et al.: ATM polymorphism IVS62+60G>A is not associated with disease aggressiveness in prostate cancer. *Urology* 67: 1320-1323, 2006.
15. Nam RK, Zhang WW, Jewett MA, et al.: The use of genetic markers to determine risk for prostate cancer at prostate biopsy. *Clin Cancer Res* 11: 8391-8397, 2005.
16. Naslund-Koch C, Nordestgaard BG and Bojesen SE: Increased risk for other cancers in addition to breast cancer for CHEK2\*1100delC heterozygotes estimated from the Copenhagen General Population Study. *J Clin Oncol* 34: 1208-1216, 2016.
17. Gambhira R, Ledet EM, Dotiwala A, Mandal D and Sartor AO: Copy number variations in AR-associated and DNA repair genes from plasma cell-free DNA of metastatic CRPC patients. *J Clin Oncol* 34: no pagination, 2016.

18. Xia S, Kohli M, Du M, et al.: Plasma genetic and genomic abnormalities predict treatment response and clinical outcome in advanced prostate cancer. *Oncotarget* 6: 16411-16421, 2015.
19. Beltran H, Eng K, Mosquera JM, et al.: Whole-exome sequencing of metastatic cancer and biomarkers of treatment response. *JAMA Oncol* 1: 466-474, 2015.
20. Palapattu GS, Cani AK, Huang J, et al.: Progression of low-to high-grade prostate cancer: molecular profiling of tissue obtained by serial targeted biopsy. *J Clin Oncol* 33: no pagination, 2015.
21. Robbins CM, Tembe WA, Baker A, et al.: Copy number and targeted mutational analysis reveals novel somatic events in metastatic prostate tumors. *Genome Res* 21: 47-55, 2011.
22. Beltran H, Yelensky R, Frampton GM, et al.: Targeted next-generation sequencing of advanced prostate cancer identifies potential therapeutic targets and disease heterogeneity. *Eur Urol* 63: 920-926, 2013.
23. Cheng Y, Thorne H, Bolton D, et al.: Altered significance of D'Amico risk assessment in BRCA2 positive vs negative patients from high risk breast cancer families. *J Urol* 185: e62, 2011.
24. Nicolas E, Arora S, Zhou Y, et al.: Systematic evaluation of underlying defects in DNA repair as an approach to case-only assessment of familial prostate cancer. *Oncotarget* 6: 39614-39633, 2015.
25. Meyer A, Wilhelm B, Dork T, et al.: ATM missense variant P1054R predisposes to prostate cancer. *Radiother Oncol* 83: 283-288, 2007.
26. Damaraju S, Murray D, Dufour J, et al.: Association of DNA repair and steroid metabolism gene polymorphisms with clinical late toxicity in patients treated with conformal radiotherapy for prostate cancer. *Clin Cancer Res* 12: 2545-2554, 2006.
27. Schweizer MT, Cheng HH, Tretiakova MS, et al.: Mismatch repair deficiency may be common in ductal adenocarcinoma of the prostate. *Oncotarget* 7: 82504-82510, 2016.
28. True L, Gulati R, Lange J, et al.: Histological patterns of ductal adenocarcinoma of prostate correlates with mutations in DNA repair genes and may aid in selecting the type of systemic therapy for castration-resistant prostate carcinoma. Presented at the United States & Canadian Academy of Pathology (USCAP) Annual Meeting; 4-10 Mar 2017; San Antonio: US. 2017 [accessed 7.12.17].
29. Stephens PJ, Gay LM, Ali SM, et al.: Comprehensive genomic profiling of neuroendocrine carcinoma of the prostate. *J Clin Oncol* 34: no pagination, 2016.
30. Abida W, Armenia J, Gopalan A, et al.: Prospective genomic profiling of prostate cancer across disease states reveals germline and somatic alterations that may affect clinical decision making. *JCO Precis Oncol*. 31 May, 2017.
31. Agalliu I, Karlins E, Kwon EM, et al.: Rare germline mutations in the BRCA2 gene are associated with early-onset prostate cancer. *Br J Cancer* 97: 826-831, 2007.
32. Agalliu I, Gern R, Leanza S and Burk RD: Associations of high-grade prostate cancer with BRCA1 and BRCA2 founder mutations. *Clin Cancer Res* 15: 1112-1120, 2009.
33. Annala M, Struss WJ, Warner EW, et al.: Treatment outcomes and tumor loss of heterozygosity in germline DNA repair-deficient prostate cancer. *Eur Urol* 72: 34-42, 2017.
34. Antonarakis ES, Lu C, Lubber B, et al.: Germline DNA-repair gene mutations and outcomes in men with metastatic castration-resistant prostate cancer receiving first-line abiraterone and enzalutamide. *Eur Urol*, 2018.



35. Beltran H, Sboner A, Mosquera JM, et al.: Precision medicine program for whole-exome sequencing (WES) provides new insight on platinum sensitivity in advanced prostate cancer (PCa). *J Clin Oncol* 33: no pagination, 2015.
36. Boudadi K, Suzman DL, Lubner B, et al.: Phase 2 biomarker-driven study of ipilimumab plus nivolumab (Ipi/Nivo) for ARV7-positive metastatic castrate-resistant prostate cancer (mCRPC). *J Clin Oncol* 35: no pagination, 2017.
37. Cancer Genome Atlas Research N: The molecular taxonomy of primary prostate cancer. *Cell* 163: 1011-1025, 2015.
38. Castro E, Goh CL, Olmos D, et al.: Correlation of germ-line BRCA2 mutations with aggressive prostate cancer and outcome. *J Clin Oncol* 29: no pagination, 2011.
39. Castro E, Olmos D, Goh CL, et al.: Effect of germ-line BRCA mutations in biochemical relapse and survival after treatment for localized prostate cancer. *J Clin Oncol* 31: no pagination, 2013.
40. Castro E, Goh C, Leongamornlert D, et al.: Effect of BRCA mutations on metastatic relapse and cause-specific survival after radical treatment for localised prostate cancer. *Eur Urol* 68: 186-193, 2015.
41. Cesaretti JA, Stock RG, Atencio DP, et al.: A genetically determined dose-volume histogram predicts for rectal bleeding among patients treated with prostate brachytherapy. *Int J Radiat Oncol Biol Phys* 68: 1410-1416, 2007.
42. Chi KN, Annala M, Sunderland K, et al.: A randomized phase II cross-over study of abiraterone + prednisone (ABI) vs enzalutamide (ENZ) for patients (pts) with metastatic, castration-resistant prostate cancer (mCRPC). *J Clin Oncol* 35: no pagination, 2017.
43. Decker B, Karyadi DM, Davis BW, et al.: Biallelic BRCA2 mutations shape the somatic mutational landscape of aggressive prostate tumors. *Am J Hum Genet* 98: 818-829, 2016.
44. Edwards SM, Kote-Jarai Z, Meitz J, et al.: Two percent of men with early-onset prostate cancer harbor germline mutations in the BRCA2 gene. *Am J Hum Genet* 72: 1-12, 2003.
45. Evans JR, Zhao SG, Chang SL, et al.: Patient-level DNA damage and repair pathway profiles and prognosis after prostatectomy for high-risk prostate cancer. *JAMA Oncol* 2: 471-480, 2016.
46. Fachal L, Gomez-Caamano A, Peleteiro P, et al.: Association of a XRCC3 polymorphism and rectum mean dose with the risk of acute radio-induced gastrointestinal toxicity in prostate cancer patients. *Radiation Oncol* 105: 321-328, 2012.
47. Fontugne J, Ramazanoglu S, Knudsen K, et al.: DNA damage response genes in prostate cancer: development of a novel targeted sequencing platform. *Lab Invest* 95: 220A-221A, 2015.
48. Gallagher DJ, Cronin AM, Milowsky MI, et al.: Germline BRCA mutation does not prevent response to taxane-based therapy for the treatment of castration-resistant prostate cancer. *BJU Int* 109: 713-719, 29 Jan 2011.
49. Gallagher DJ, Gaudet MM, Pal P, et al.: Germline BRCA mutations denote a clinicopathologic subset of prostate cancer. *Clin Cancer Res* 16: 2115-2121, 2010.
50. Gayther SA, de Foy KA, Harrington P, et al.: The frequency of germ-line mutations in the breast cancer predisposition genes BRCA1 and BRCA2 in familial prostate cancer. The Cancer Research Campaign/British Prostate Group United Kingdom Familial Prostate Cancer Study Collaborators. *Cancer Res* 60: 4513-4518, 2000.
51. Giusti RM, Rutter JL, Duray PH, et al.: A twofold increase in BRCA mutation related prostate cancer among Ashkenazi Israelis is not associated with distinctive histopathology. *J Med Genet* 40: 787-792, 2003.

52. Gourdin TS and Lilly MB: Genomic profiling of metastatic prostate cancer through analysis of circulating tumor DNA (ctDNA). *J Clin Oncol* 34: no pagination, 2016.
53. Grasso CS, Wu YM, Robinson DR, et al.: The mutational landscape of lethal castration-resistant prostate cancer. *Nature* 487: 239-243, 2012.
54. Hall EJ, Schiff PB, Hanks GE, et al.: A preliminary report: frequency of A-T heterozygotes among prostate cancer patients with severe late responses to radiation therapy. *Cancer J Sci Am* 4: 385-389, 1998.
55. Hamel N, Kotar K and Foulkes WD: Founder mutations in BRCA1/2 are not frequent in Canadian Ashkenazi Jewish men with prostate cancer. *BMC Med Genet* 4: 7, 2003.
56. Hart SN, Ellingson MS, Schahl K, et al.: Determining the frequency of pathogenic germline variants from exome sequencing in patients with castrate-resistant prostate cancer. *BMJ Open* 6: e010332, 2016.
57. Hayano T, Matsui H, Nakaoka H, et al.: Germline variants of prostate cancer in Japanese families. *PLoS One* 11: e0164233, 2016.
58. Hebbingring SJ, Fredriksson H, White KA, et al.: Role of the Nijmegen breakage syndrome 1 gene in familial and sporadic prostate cancer. *Cancer Epidemiol Biomarkers Prev* 15: 935-938, 2006.
59. Hubert A, Peretz T, Manor O, et al.: The Jewish Ashkenazi founder mutations in the BRCA1/BRCA2 genes are not found at an increased frequency in Ashkenazi patients with prostate cancer. *Am J Hum Genet* 65: 921-924, 1999.
60. Hussain M, Daignault S, Twardowski P, et al.: Abiraterone + prednisone (Abi) +/- veliparib (Vel) for patients (pts) with metastatic castration-resistant prostate cancer (CRPC): NCI 9012 updated clinical and genomics data. *J Clin Oncol* 35: no pagination, 2017.
61. Jefferies M, Cox A, Clarke A and Kynaston H: Targeted next-generation sequencing analysis of primary prostate cancer identifies potential therapeutic targets. *J Urol* 197: e594-e595, 2017.
62. Kaufman B, Shapira-Frommer R, Schmutzler RK, et al.: Olaparib monotherapy in patients with advanced cancer and a germline BRCA1/2 mutation. *J Clin Oncol* 33: 244-250, 2015.
63. Kirchhoff T, Kauff ND, Mitra N, et al.: BRCA mutations and risk of prostate cancer in Ashkenazi Jews. *Clin Cancer Res* 10: 2918-2921, 2004.
64. Kote-Jarai Z, Leongamornlert D, Saunders E, et al.: BRCA2 is a moderate penetrance gene contributing to young onset prostate cancer, but not disease over 65 years. *Cancer Res* 71: no pagination, 2011.
65. LaDuca H, Espenschied C, Dolinsky JS, et al.: Hereditary cancer panel results identify gaps in knowledge of cancer risks and limitations in current guidelines. Presented at the American Society of Human Genetics Annual Meeting; 17-21 Oct 2017; Orlando: US. 2017 [accessed 7.12.17].
66. Lara P, McPherson J, Heyer W, et al.: 827P - Comprehensive characterization of BRCA1 and BRCA2 alterations in circulating tumor DNA and tumor tissue in men with prostate cancer: Implications for clinical care. Presented at European Society for Medical Oncology (ESMO) 2017 Congress; 1-12 Sep 2017; Madrid: Spain. 2017 [accessed 28.2.18].
67. Ledet EM, Ernst EM, Schiff J, Lin S, Lewis BE and Sartor AO: Germline variants and family history in caucasian and African-American prostate cancer. *J Clin Oncol* 35: no pagination, 2017.

68. Lehrer S, Fodor F, Stock RG, et al.: Absence of 185delAG mutation of the BRCA1 gene and 6174delT mutation of the BRCA2 gene in Ashkenazi Jewish men with prostate cancer. *Br J Cancer* 78: 771-773, 1998.
69. Leongamornlert D, Mahmud N, Tymrakiewicz M, et al.: Germline BRCA1 mutations increase prostate cancer risk. *Br J Cancer* 106: 1697-1701, 2012.
70. Leongamornlert D, Saunders E, Dadaev T, et al.: Frequent germline deleterious mutations in DNA repair genes in familial prostate cancer cases are associated with advanced disease. *Br J Cancer* 110: 1663-1672, 2014.
71. Lu C, Xie M, Wendl MC, et al.: Patterns and functional implications of rare germline variants across 12 cancer types. *Nat Commun* 6, 2015.
72. Maier C, Herkommer K, Luedeke M, Rinckleb A, Schrader M and Vogel W: Subgroups of familial and aggressive prostate cancer with considerable frequencies of BRCA2 mutations. *Prostate* 74: 1444-1451, 2014.
73. Manson-Bahr D, Ball R, Gundem G, et al.: Mutation detection in formalin-fixed prostate cancer biopsies taken at the time of diagnosis using next-generation DNA sequencing. *J Clin Pathol* 68: 212-217, 2015.
74. Marshall M, Tully D, Susswein L, Theobald K, Murphy P and Klein R: Panel testing in men with prostate cancer meeting NCCN genetic testing criteria (AB2017-59). *J Natl Compr Canc Netw* 15: e15-e16, 2017.
75. Mateo J, Carreira S, Sandhu S, et al.: DNA-repair defects and olaparib in metastatic prostate cancer. *N Engl J Med* 373: 1697-1708, 2015.
76. Myers CE, Feldman R, Abbott BL, Reddy SK and Castro M: Frequency of BRCA mutations and co-occurring alterations in prostate cancer. *J Clin Oncol* 34: no pagination, 2016.
77. Na R, Lilly S, Han M, et al.: Germline mutations in DNA repair genes are significantly enriched in lethal prostate cancer and are associated with disease survival. *Int J Urol* 197: e763, 2017.
78. Nastiuk KL, Mansukhani M, Terry MB, et al.: Common mutations in BRCA1 and BRCA2 do not contribute to early prostate cancer in Jewish men. *Prostate* 40: 172-177, 1999.
79. Nelson P, Mateo J, Beltran H, et al.: Inherited mutations in DNA repair genes in men with metastatic castration-resistant prostate cancer. *J Clin Oncol* 34: no pagination, 2016.
80. Nguyen PL, Yang M, Werner L, et al.: The impact of genetic variants in the double-stranded DNA break repair pathway on cancer control in men treated with radiation for prostate cancer. *Int J Radiat Oncol Biol Phys* 81: S380, 2011.
81. Nicolosi PLW, Michalski ST, Freschi B, et al.: Need for re-evaluation of current guidelines based on results from germline genetic testing in prostate cancer. *J Clin Oncol* 35: no pagination, 2017.
82. Nientiedt C, Heller M, Endris V, et al.: Mutations in BRCA2 and taxane resistance in prostate cancer. *Sci Rep* 7: 4574, 2017.
83. Patel VL, Busch E, D'Amico AV and Rebbeck TR: BRCA2 mutations in prostate cancer assort into cluster regions. *Int J Radiat Oncol* 96: E569-E570, 2016.
84. Petrovics G, Ravindranath L, Chen Y, et al.: Higher frequency of germline BRCA1 and BRCA2 mutations in African American prostate cancer. *J Urol* 195: e548, 2016.
85. Pomerantz MM, Spisak S, Jia L, et al.: The association between germline BRCA2 variants and sensitivity to platinum-based chemotherapy among men with metastatic prostate cancer. *Cancer* 123: 3532-3539, 2017.

86. Pritchard CC, Morrissey C, Kumar A, et al.: Complex MSH2 and MSH6 mutations in hypermutated microsatellite unstable advanced prostate cancer. *Nat Commun* 5: 4988, 2014.
87. Pritchard CC, Mateo J, Walsh MF, et al.: Inherited DNA-repair gene mutations in men with metastatic prostate cancer. *N Engl J Med* 375: 443-453, 2016.
88. Pugh TJ, Keyes M, Barclay L, et al.: Sequence variant discovery in DNA repair genes from radiosensitive and radiotolerant prostate brachytherapy patients. *Clin Cancer Res* 15: 5008-5016, 2009.
89. Robinson D, Van Allen EM, Wu YM, et al.: Integrative clinical genomics of advanced prostate cancer. *Cell* 161: 1215-1228, 2015.
90. Romero Laorden N, Lozano Mejorada R, Piulats Rodriguez J, et al.: 826P - Prevalence and baseline clinico-pathological associations of germline deleterious mutations in DNA repair genes (gmDDR) in a metastatic castration resistant prostate cancer (mCRPC) prospective spanish cohort (PROREPAIR-B study). Presented at European Society for Medical Oncology (ESMO) 2017 Congress; 1-12 Sep 2017; Madrid: Spain. 2017 [accessed 28.2.18].
91. Sanchez A, Schoenfeld JD, Nguyen PL, et al.: Common variation in BRCA1 may have a role in progression to lethal prostate cancer after radiation treatment. *Prostate Cancer Prostatic Dis* 19: 197-201, 2016.
92. Sandhu SK, Omlin A, Hylands L, et al.: Poly (ADP-ribose) polymerase (PARP) inhibitors for the treatment of advanced germline BRCA2 mutant prostate cancer. *Ann Oncol* 24: 1416-1418, 2013.
93. Shapiro J, Voskoboynik M, Krieger L, et al.: Trial of rucaparib in prostate indications 2 (TRITON2): an international, multicentre, open-label phase 2 study of the PARP inhibitor rucaparib in patients with metastatic castration-resistant prostate cancer (MCRPC) associated with homologous recombination deficiency (HRD). Presented at the Annual Scientific Meeting of the Australian and New Zealand Urogenital and Prostate (ANZUP) 2017: Australia. *Asia Pac J Clin Oncol* 13: 61, 2017.
94. Sofronescu AG, Marshall D and Zhu Y: TGFbeta1 -509 C>T and XRCC1 399 Arg>Gln (28152G>A) correlate with increased side effects induced by radiotherapy in prostate cancer patients. *Clin Chem* 58: A42, 2012.
95. Struss WJ, Annala M, Warner EW, et al.: Germline DNA repair mutations in metastatic castration-resistant prostate cancer: therapy response and applicability of circulating tumor DNA. *J Clin Oncol* 35: no pagination, 2017.
96. Timms KM, Cuzick J, Neff C, et al.: The molecular landscape of genome instability in prostate cancer. Presented at the European Society for Medical Oncology Congress; 2016. 2016 [accessed 7.12.17].
97. Tischkowitz MD, Yilmaz A, Chen LQ, et al.: Identification and characterization of novel SNPs in CHEK2 in Ashkenazi Jewish men with prostate cancer. *Cancer Lett* 270: 173-180, 2008.
98. Vazina A, Baniel J, Yaacobi Y, et al.: The rate of the founder Jewish mutations in BRCA1 and BRCA2 in prostate cancer patients in Israel. *Br J Cancer* 83: 463-466, 2000.
99. Williams BJ, Jones E, Zhu XL, et al.: Evidence for a tumor suppressor gene distal to BRCA1 in prostate cancer. *J Urol* 155: 720-725, 1996.
100. Wu X, Dong X, Liu W and Chen J: Characterization of CHEK2 mutations in prostate cancer. *Hum Mutat* 27: 742-747, 2006.

101. Zhu Y, Marshall D, Garrett-Mayer E, Zhou D and Jenrette J: Association between urinary morbidity/erectile dysfunction induced by radiotherapy and SNPs of radiosensitivity-relevant genes in prostate cancer patients. *Clin Chem* 56: A90, 2010.
102. Zuhlke KA, Johnson AM, Okoth LA, et al.: Identification of a novel NBN truncating mutation in a family with hereditary prostate cancer. *Fam Cancer* 11: 595-600, 2012.
103. Akbari MR, Wallis CJD, Toi A, et al.: The impact of a BRCA2 mutation on mortality from screen-detected prostate cancer. *Curr Oncol* 21: e362, 2014.
104. Kote-Jarai Z, Leongamornlert D, Saunders E, et al.: BRCA2 is a moderate penetrance gene contributing to young-onset prostate cancer: implications for genetic testing in prostate cancer patients. *Br J Cancer* 105: 1230-1234, 2011.
105. Edwards SM, Evans DG, Hope Q, et al.: Prostate cancer in BRCA2 germline mutation carriers is associated with poorer prognosis. *Br J Cancer* 103: 918-924, 2010.
106. Na R, Zheng SL, Han M, et al.: Germline mutations in ATM and BRCA1/2 distinguish risk for lethal and indolent prostate cancer and are associated with early age at death. *Eur Urol* 71: 740-747, 2017.
107. Maier C, Wiest I, Luedeke M, et al.: BRCA2 mutation analysis in familial and early onset prostate cancer. *Medizinische Genetik* 11: 97-98, 2010.
108. Lin S, Ledet EM, Schiff J, et al.: Inherited pathologic mutations and family history in patients with prostate cancer. *J Clin Oncol* 35: no pagination, 2017.
109. Mayo Clinic and National Cancer Institute: Gene expression in patients with metastatic prostate cancer receiving CYP-17 inhibition therapy. NCT01953640. In: *ClinicalTrials.gov* [Internet]. Bethesda (MD): National Library of Medicine (US). In: NCT01953640, 2018 [accessed 25.4.18].
110. Cesaretti JA, Stock RG, Lehrer S, et al.: ATM sequence variants are predictive of adverse radiotherapy response among patients treated for prostate cancer. *Int J Radiat Oncol Biol Phys* 61: 196-202, 2005.
111. Na R, Zheng SL, Han M, et al.: Germline mutations in ATM and BRCA1/2 distinguish risk for lethal and indolent prostate cancer and are associated with early age at death. *Eur Urol Suppl* 16: e832-e833, 2017.
112. Zheng SL, Na R, Han M, et al.: CHEK2 mutations increase risk for prostate cancer but do not differentiate risk of lethal from indolent disease. *J Urol* 197: e678, 2017.
113. Na R, Xu J and Isaacs WB: DNA-repair gene mutations in metastatic prostate cancer. *N Engl J Med* 375: 1802-1803, 2016.

Figure S1. Percentage of studies meeting JBI prevalence quality criteria by question. JBI, Joanna Briggs Institute; NA, not applicable.

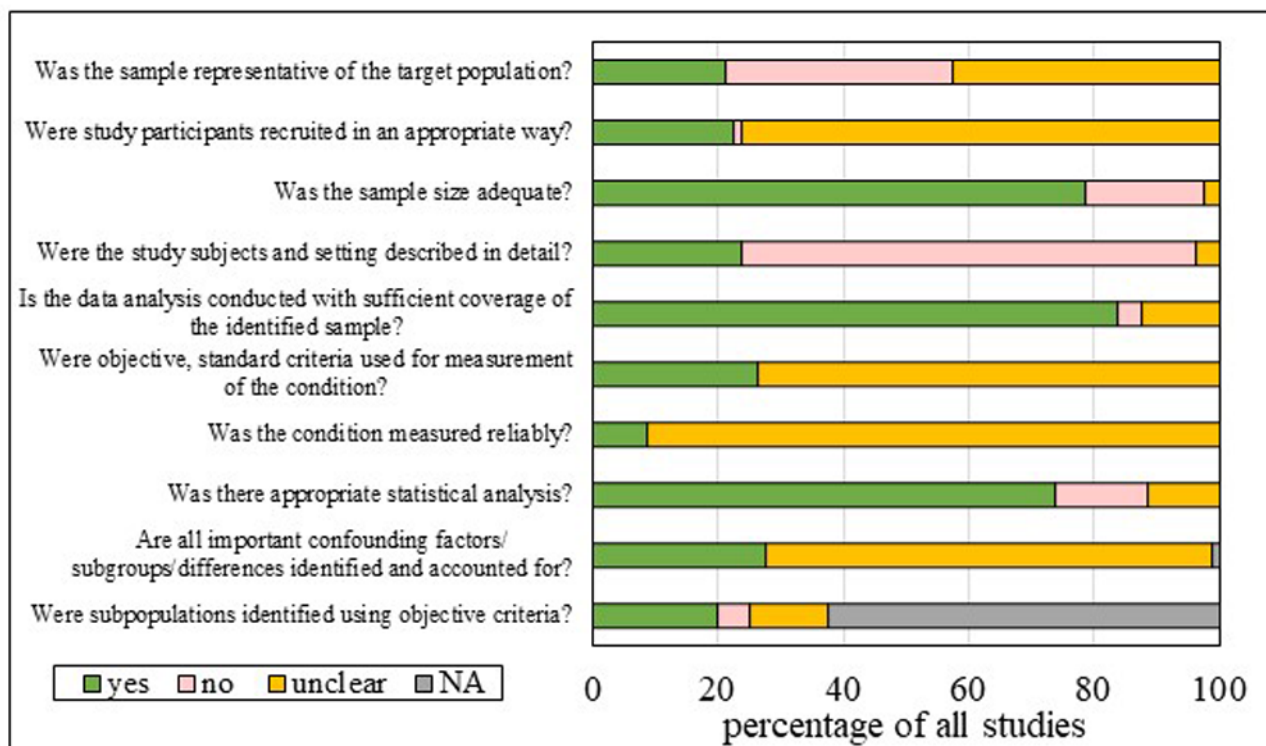

Supplement: Supplementary_Data.pdf [file Supplementary_Data.pdf]
